# Supplementary material for: Identification of candidate mitochondrial inheritance determinants using the mammalian cell-free system
Source: eLife. 2023 Jul 20;12:RP85596. doi: 10.7554/eLife.85596 (PMC10393022; doi:10.7554/eLife.85596)
Supplement: Supplementary file 1. [file elife-85596-supp1.xlsx]

## Sheet: Legend
Terms
Sus scrofa UniProt Accession	Unique UniProt accession for Sus scrofa. Information accessible at https://www.uniprot.org/
# Peptides	The total number of peptide sequences used to identify the protein.
# Unique	The total number of distinct peptide sequences unique to the protein.
OS = Organism Name	All protien were investigated in Sus scrofa.
OX = Organism Identifier	9823 is the identification number for Sus scrofa.
GN = Gene Name	Displays the Entrez Gene database identification of the gene that the protein is derived from.
SV = Sequence Version	The version of the sequence for a protien, proteins can have multiple sequence version in the Uniprot data base
PE = Protein Existence Level	This number indicates the type of evidence that supports the existence of the protein; 1 = Experimental evidence at the protein level 2 = Experimental evidence at the transcript level 3 = Protein inferred by homolgy 4 = Protein is predicited 5 = Protein is uncertain For more information visit https://www.uniprot.org/help/protein_existence

## Sheet: 4 hrs Original Data
Sus scrofa UniProt Accession	Protein Description	Avg. Mass	#Peptides	#Unique Peptides	Control Sperm Rep 1	Control Sperm Rep 2	Control Sperm Rep 3	Primed Control Rep 1	Primed Control Rep 2	Primed Control Rep 3	Cell-Free Treated Rep 1	Cell-Free Treated Rep 2	Cell-Free Treated Rep 3	Oocyte Extract Rep 1	Oocyte Extract Rep 2	Oocyte Extract Rep 3
A0A286ZWH7|A0A286ZWH7_PIG	A-kinase anchoring protein 4 OS=Sus scrofa OX=9823 GN=AKAP4 PE=4 SV=1	94393	651	651	4536	1733	400	3518	1394	2156	4631	1856	1533	394	414	85
F1RR82|F1RR82_PIG	Outer dense fiber of sperm tails 2 OS=Sus scrofa OX=9823 GN=ODF2 PE=4 SV=3	99196	426	20	1700	603	864	1693	778	1290	2113	1015	924	227	165	81
D9IFC3|D9IFC3_PIG	Outer dense fiber 2 OS=Sus scrofa OX=9823 GN=ODF2 PE=2 SV=1	93261	408	2	1625	558	787	1610	731	1204	2048	974	804	222	149	61
F1RYK8|F1RYK8_PIG	Fibrous sheath interacting protein 2 OS=Sus scrofa OX=9823 GN=FSIP2 PE=4 SV=3	761102	463	458	618	394	58	531	360	364	502	326	202	30	14	1
A0A286ZQX0|A0A286ZQX0_PIG	A-kinase anchoring protein 3 OS=Sus scrofa OX=9823 GN=AKAP3 PE=4 SV=1	95052	306	5	983	375	123	882	259	393	721	289	176	69	155	11
D3K5M3|D3K5M3_PIG	A-kinase (PRKA) anchor protein 3 OS=Sus scrofa OX=9823 GN=AKAP3 PE=2 SV=1	94045	302	1	982	0	0	872	0	0	720	0	0	69	0	0
I3LJA4|I3LJA4_PIG	Uncharacterized protein OS=Sus scrofa OX=9823 PE=3 SV=2	134207	310	310	791	330	133	396	331	170	309	121	134	47	46	14
A0A287A275|A0A287A275_PIG	Tubulin beta chain OS=Sus scrofa OX=9823 GN=TUBB4B PE=1 SV=1	49831	213	4	269	77	690	1495	276	1224	1263	415	1386	191	116	190
F1STE2|F1STE2_PIG	Testis specific 10 OS=Sus scrofa OX=9823 GN=TSGA10 PE=4 SV=3	81106	263	263	281	173	216	412	271	323	505	384	297	50	34	9
F2Z5B2|F2Z5B2_PIG	Tubulin beta chain OS=Sus scrofa OX=9823 GN=TUBB PE=1 SV=2	51268	182	7	185	58	435	1083	201	841	836	280	1000	143	88	160
sp|Q767L7|TBB5_PIG	Tubulin beta chain OS=Sus scrofa OX=9823 GN=TUBB PE=2 SV=1	49671	182	7	185	0	435	1083	0	841	836	0	1000	143	0	160
sp|Q29077|ODFP1_PIG	Outer dense fiber protein 1 OS=Sus scrofa OX=9823 GN=ODF1 PE=2 SV=1	29526	211	211	2081	685	44	1768	823	193	1987	920	105	100	85	10
F2Y3N8|F2Y3N8_PIG	Outer dense fiber protein OS=Sus scrofa OX=9823 GN=ODFP PE=4 SV=1	29526	211	211	2081	0	44	1768	0	193	1987	0	105	100	0	10
F1SS24|F1SS24_PIG	Fibronectin 1 OS=Sus scrofa OX=9823 GN=FN1 PE=1 SV=2	270595	302	6	204	32	2	141	116	4	101	52	0	17	161	0
F1RMX7|F1RMX7_PIG	Zonadhesin OS=Sus scrofa OX=9823 GN=ZAN PE=4 SV=3	270339	269	269	869	23	399	375	104	360	200	72	229	33	53	97
A0A286ZY95|A0A286ZY95_PIG	Fibronectin 1 OS=Sus scrofa OX=9823 GN=FN1 PE=1 SV=1	262325	298	2	206	32	2	140	116	4	101	52	0	17	162	0
F1SE27|F1SE27_PIG	Voltage-dependent anion-selective channel protein 3 OS=Sus scrofa OX=9823 GN=VDAC3 PE=1 SV=3	30604	133	126	942	465	381	719	185	773	615	278	658	66	53	32
F1SCU0|F1SCU0_PIG	Uncharacterized protein OS=Sus scrofa OX=9823 GN=LOC100516797 PE=4 SV=2	64948	170	170	369	381	384	547	160	616	549	186	509	34	47	62
A0A286ZIR3|A0A286ZIR3_PIG	Uncharacterized protein OS=Sus scrofa OX=9823 GN=LOC100516797 PE=4 SV=1	71872	170	170	369	0	384	547	0	616	549	0	509	34	0	62
F2Z5K5|F2Z5K5_PIG	Tubulin beta chain OS=Sus scrofa OX=9823 GN=TUBB4A PE=1 SV=2	49572	170	1	202	53	459	1073	203	868	791	237	934	124	85	158
F1RQD7|F1RQD7_PIG	Family with sequence similarity 71 member B OS=Sus scrofa OX=9823 GN=FAM71B PE=4 SV=2	61392	165	155	628	239	84	636	377	196	734	245	232	51	53	15
A0A287B6S4|A0A287B6S4_PIG	Uncharacterized protein OS=Sus scrofa OX=9823 GN=LOC100626097 PE=4 SV=1	766738	269	264	247	218	36	199	161	126	152	118	62	4	6	1
A0A287AGS9|A0A287AGS9_PIG	ALMS1 centrosome and basal body associated protein OS=Sus scrofa OX=9823 GN=ALMS1 PE=1 SV=1	476846	242	242	383	0	44	91	0	91	82	0	54	1	0	0
A0A287AH92|A0A287AH92_PIG	ALMS1 centrosome and basal body associated protein OS=Sus scrofa OX=9823 GN=ALMS1 PE=1 SV=1	481619	242	242	383	0	44	91	0	91	82	0	54	1	0	0
I3LQ79|I3LQ79_PIG	Major vault protein OS=Sus scrofa OX=9823 GN=MVP PE=1 SV=2	99703	191	191	0	0	0	0	0	0	33	3	4	717	343	100
F1RM74|F1RM74_PIG	Glyceraldehyde-3-phosphate dehydrogenase OS=Sus scrofa OX=9823 GN=GAPDHS PE=1 SV=2	35520	148	141	368	110	224	571	101	74	471	208	33	42	42	47
A0A288CFT0|A0A288CFT0_PIG	Triosephosphate isomerase OS=Sus scrofa OX=9823 GN=TPI1 PE=1 SV=1	30505	147	147	383	189	213	508	116	307	377	71	101	55	54	12
sp|P08001|ACRO_PIG	Acrosin OS=Sus scrofa OX=9823 GN=ACR PE=1 SV=5	45362	178	12	523	0	889	1374	0	490	739	0	682	134	0	327
F1S605|F1S605_PIG	Glutathione S-transferase OS=Sus scrofa OX=9823 GN=GSTM3 PE=1 SV=2	26933	171	158	827	515	521	979	293	952	949	518	855	96	130	70
I3LD62|I3LD62_PIG	Acrosin OS=Sus scrofa OX=9823 GN=ACR PE=3 SV=2	45044	171	5	480	35	889	1296	221	490	709	173	682	134	84	327
A0A287AI93|A0A287AI93_PIG	Uncharacterized protein OS=Sus scrofa OX=9823 GN=IQCN PE=4 SV=1	82674	161	98	331	133	17	214	167	90	222	76	76	38	41	2
F1RHU4|F1RHU4_PIG	Amine oxidase OS=Sus scrofa OX=9823 GN=IL4I1 PE=1 SV=3	64426	146	146	73	0	362	391	0	288	310	0	326	64	0	109
A0A287BPT0|A0A287BPT0_PIG	Amine oxidase OS=Sus scrofa OX=9823 GN=IL4I1 PE=1 SV=1	63550	146	146	73	41	362	391	71	288	310	107	326	64	49	109
F1RL08|F1RL08_PIG	Tektin 5 OS=Sus scrofa OX=9823 GN=TEKT5 PE=4 SV=2	56664	165	163	401	131	145	366	190	236	426	209	299	41	32	29
A0A287BPZ5|A0A287BPZ5_PIG	Uncharacterized protein OS=Sus scrofa OX=9823 GN=IQCN PE=4 SV=1	70295	156	93	412	176	28	267	213	95	280	79	57	20	24	6
F1S2F6|F1S2F6_PIG	Voltage-dependent anion-selective channel protein 2 OS=Sus scrofa OX=9823 GN=VDAC2 PE=4 SV=3	31605	114	2	897	364	307	678	164	476	507	213	529	42	44	21
F1SL45|F1SL45_PIG	Acrosin-binding protein OS=Sus scrofa OX=9823 GN=ACRBP PE=4 SV=1	60827	107	107	521	0	688	564	0	215	399	0	48	59	0	304
sp|Q29016|ACRBP_PIG	Acrosin-binding protein (Fragment) OS=Sus scrofa OX=9823 GN=ACRBP PE=1 SV=1	60540	107	107	521	35	688	564	195	215	399	197	48	59	141	304
sp|Q9MZ15|VDAC2_PIG	Voltage-dependent anion-selective channel protein 2 OS=Sus scrofa OX=9823 GN=VDAC2 PE=2 SV=1	31593	113	1	896	0	0	667	0	0	497	0	0	42	0	0
F1ST87|F1ST87_PIG	Calicin OS=Sus scrofa OX=9823 GN=CCIN PE=4 SV=1	66818	136	136	261	192	152	347	251	323	416	240	121	40	38	29
F1SMN3|F1SMN3_PIG	Coiled-coil domain containing 136 OS=Sus scrofa OX=9823 GN=CCDC136 PE=1 SV=3	133275	142	142	257	172	78	134	155	101	137	110	57	6	13	1
F1SMN4|F1SMN4_PIG	Coiled-coil domain containing 136 OS=Sus scrofa OX=9823 GN=CCDC136 PE=1 SV=2	133510	142	142	257	0	78	134	0	101	137	0	57	6	0	1
sp|Q5XLD3|KCRM_PIG	Creatine kinase M-type OS=Sus scrofa OX=9823 GN=CKM PE=2 SV=1	43059	143	121	159	0	0	464	0	0	82	59	9	837	1311	105
F1SEF3|F1SEF3_PIG	Chromosome 2 open reading frame 16 OS=Sus scrofa OX=9823 GN=C2orf16 PE=4 SV=2	221205	136	136	193	163	24	121	148	66	74	36	33	5	1	0
A0A287B8G0|A0A287B8G0_PIG	Pyruvate kinase OS=Sus scrofa OX=9823 GN=PKM PE=1 SV=1	63182	110	6	62	0	57	126	0	31	129	0	3	44	0	10
A0A287AFU3|A0A287AFU3_PIG	Dynein axonemal heavy chain 17 OS=Sus scrofa OX=9823 GN=DNAH17 PE=4 SV=1	502796	208	203	83	59	39	32	110	1	14	45	0	0	3	0
A0A287AK58|A0A287AK58_PIG	Keratin 14 OS=Sus scrofa OX=9823 GN=KRT14 PE=1 SV=1	54797	123	1	36	0	0	28	0	0	61	0	0	523	0	0
F1SP29|F1SP29_PIG	Actin like 7A OS=Sus scrofa OX=9823 GN=ACTL7A PE=1 SV=1	49203	121	121	153	122	94	95	76	69	95	51	27	11	27	17
F1RVC1|F1RVC1_PIG	Glycerol kinase 2 OS=Sus scrofa OX=9823 GN=GK2 PE=3 SV=2	60651	121	97	57	39	95	270	80	212	225	106	79	15	20	10
A0A287A3S5|A0A287A3S5_PIG	Tektin 4 OS=Sus scrofa OX=9823 GN=TEKT4 PE=4 SV=1	51941	102	101	106	68	108	135	78	141	163	94	213	11	14	9
F1SHL9|F1SHL9_PIG	Pyruvate kinase OS=Sus scrofa OX=9823 GN=PKM PE=1 SV=3	57878	109	5	58	32	48	122	53	26	116	15	3	45	30	10
A0A0B8S031|A0A0B8S031_PIG	Pyruvate kinase OS=Sus scrofa domesticus OX=9825 GN=PKM PE=3 SV=1	57878	109	5	58	0	48	122	0	26	116	0	3	45	0	10
F1SHC1|F1SHC1_PIG	Tubulin alpha chain OS=Sus scrofa OX=9823 GN=LOC100127131 PE=1 SV=1	49927	103	1	95	0	0	594	0	0	511	0	0	77	0	0
sp|D5K8A2|MIEAP_PIG	Mitochondria-eating protein OS=Sus scrofa OX=9823 GN=SPATA18 PE=2 SV=1	63300	119	119	339	147	83	49	97	46	41	42	41	5	16	1
F1SE68|F1SE68_PIG	Mitochondria-eating protein OS=Sus scrofa OX=9823 GN=SPATA18 PE=4 SV=3	63960	119	119	339	0	83	49	0	46	41	0	41	5	0	1
F1SHQ8|F1SHQ8_PIG	Tubulin alpha chain OS=Sus scrofa OX=9823 GN=TUBA1A PE=3 SV=2	48286	101	1	101	0	0	645	0	0	547	0	0	80	0	0
A0A0B8RTY2|A0A0B8RTY2_PIG	Actin beta OS=Sus scrofa domesticus OX=9825 GN=ACTB PE=3 SV=1	41737	84	2	79	0	0	106	0	0	106	0	0	172	0	0
sp|Q6QAQ1|ACTB_PIG	Actin cytoplasmic 1 OS=Sus scrofa OX=9823 GN=ACTB PE=1 SV=2	41737	84	2	79	0	0	106	0	0	106	0	0	172	0	0
sp|P02550|TBA1A_PIG	Tubulin alpha-1A chain OS=Sus scrofa OX=9823 GN=TUBA1A PE=1 SV=1	50069	107	3	101	0	0	630	0	0	517	0	0	70	0	0
A0A0B8RTA2|A0A0B8RTA2_PIG	Actin gamma 1 OS=Sus scrofa domesticus OX=9825 GN=ACTG1 PE=3 SV=1	41793	83	1	82	0	0	106	0	0	104	0	0	171	0	0
I3LVD5|I3LVD5_PIG	Actin gamma 1 OS=Sus scrofa OX=9823 GN=ACTG1 PE=1 SV=1	41793	83	1	82	0	0	106	0	0	104	0	0	171	0	0
A0A287AD85|A0A287AD85_PIG	Polycystin family receptor for egg jelly OS=Sus scrofa OX=9823 GN=PKDREJ PE=4 SV=1	250153	121	121	93	0	128	23	0	4	22	0	5	4	0	19
F1S6M7|F1S6M7_PIG	Tubulin beta chain OS=Sus scrofa OX=9823 PE=1 SV=1	50419	96	8	90	37	222	510	123	443	442	157	458	80	53	58
I7HJH6|I7HJH6_PIG	Seminal plasma sperm motility inhibitor OS=Sus scrofa OX=9823 GN=AQN-3 PE=2 SV=1	15034	83	30	192	49	63	731	252	97	701	364	147	122	230	6
F1SQZ1|F1SQZ1_PIG	F-actin-capping protein subunit alpha OS=Sus scrofa OX=9823 GN=CAPZA3 PE=3 SV=1	34878	95	95	66	114	65	147	99	110	175	145	116	11	24	19
F1RW75|F1RW75_PIG	Desmoplakin OS=Sus scrofa OX=9823 GN=DSP PE=1 SV=3	331618	128	128	14	25	0	2	29	0	4	2	2	246	56	1
X4ZHK0|X4ZHK0_PIG	Phosphoglycerate kinase OS=Sus scrofa OX=9823 GN=PGK2 PE=2 SV=1	44895	97	77	137	83	158	121	81	61	97	53	28	13	5	17
sp|Q6RI85|PGK2_PIG	Phosphoglycerate kinase 2 OS=Sus scrofa OX=9823 GN=PGK2 PE=2 SV=3	44895	97	77	137	0	158	121	0	61	97	0	28	13	0	17
X4ZFQ2|X4ZFQ2_PIG	Phosphoglycerate kinase OS=Sus scrofa OX=9823 GN=PGK2 PE=2 SV=1	44846	97	77	137	0	158	121	0	61	97	0	28	13	0	17
A0A286ZUM8|A0A286ZUM8_PIG	Transitional endoplasmic reticulum ATPase OS=Sus scrofa OX=9823 GN=VCP PE=1 SV=1	98280	123	123	134	0	85	72	0	44	65	0	41	10	0	8
F1SIH8|F1SIH8_PIG	Transitional endoplasmic reticulum ATPase OS=Sus scrofa OX=9823 GN=VCP PE=1 SV=3	91001	123	123	134	97	85	72	143	44	65	171	41	10	34	8
F1SDE8|F1SDE8_PIG	Tektin 3 OS=Sus scrofa OX=9823 GN=TEKT3 PE=4 SV=2	56473	93	93	152	210	100	156	100	140	184	124	187	17	13	23
Q2I373|Q2I373_PIG	Fascin OS=Sus scrofa OX=9823 GN=FSCN3 PE=2 SV=1	56181	104	104	282	145	52	252	157	140	180	109	72	16	14	2
A0A0B8RTA5|A0A0B8RTA5_PIG	Aconitate hydratase mitochondrial OS=Sus scrofa domesticus OX=9825 GN=ACO2 PE=3 SV=1	85577	134	134	101	52	127	2	36	0	3	15	1	32	26	21
A0A287AQA6|A0A287AQA6_PIG	SPEM family member 3 OS=Sus scrofa OX=9823 GN=SPEM3 PE=4 SV=1	125423	127	127	213	143	25	64	109	29	52	13	10	1	3	0
F1RVR2|F1RVR2_PIG	Dynein axonemal heavy chain 8 OS=Sus scrofa OX=9823 GN=DNAH8 PE=4 SV=2	536125	179	2	61	54	0	21	77	0	4	43	0	1	3	0
A0A286ZSC6|A0A286ZSC6_PIG	Dynein axonemal heavy chain 8 OS=Sus scrofa OX=9823 GN=DNAH8 PE=4 SV=1	509113	178	1	60	53	37	21	77	1	4	43	0	1	3	0
K7GSU4|K7GSU4_PIG	EF-hand domain containing 2 OS=Sus scrofa OX=9823 GN=EFHC2 PE=4 SV=2	87130	109	109	145	90	66	135	110	48	110	108	94	15	9	3
F1SGG6|F1SGG6_PIG	Keratin 5 OS=Sus scrofa OX=9823 GN=KRT5 PE=1 SV=3	63166	94	16	37	83	0	20	108	3	45	33	10	495	151	12
sp|A5A8V7|HS71L_PIG	Heat shock 70 kDa protein 1-like OS=Sus scrofa OX=9823 GN=HSPA1L PE=2 SV=1	70344	115	81	79	60	248	51	43	32	41	19	5	51	74	34
A0A287BIL8|A0A287BIL8_PIG	Endoplasmic reticulum chaperone BiP OS=Sus scrofa OX=9823 GN=HSPA5 PE=1 SV=1	72269	89	86	8	7	9	11	16	0	15	4	4	361	322	86
A0A287BJP9|A0A287BJP9_PIG	Uncharacterized protein OS=Sus scrofa OX=9823 GN=SPATA31D1 PE=4 SV=1	170033	122	122	240	145	53	63	114	38	57	23	20	2	7	2
K7GLT8|K7GLT8_PIG	ATP synthase subunit beta OS=Sus scrofa OX=9823 GN=ATP5F1B PE=1 SV=2	60831	119	108	115	0	0	6	0	0	6	0	0	128	0	0
A0A287BD08|A0A287BD08_PIG	Uncharacterized protein OS=Sus scrofa OX=9823 PE=3 SV=1	60682	103	50	39	34	68	148	68	163	134	81	74	12	17	15
D3K5J6|D3K5J6_PIG	Acrosomal vesicle protein 1 OS=Sus scrofa OX=9823 GN=ACRV1 PE=1 SV=1	28797	72	72	47	11	230	302	37	432	378	5	64	21	16	70
F1SV60|F1SV60_PIG	Tektin 2 OS=Sus scrofa OX=9823 GN=TEKT2 PE=4 SV=1	49899	88	87	54	53	87	71	32	115	112	86	188	6	9	14
F1SEB3|F1SEB3_PIG	Chromosome 9 open reading frame 24 OS=Sus scrofa OX=9823 GN=C9orf24 PE=4 SV=2	34413	92	92	192	105	107	208	126	152	167	106	133	23	18	11
F1RRQ6|F1RRQ6_PIG	Uncharacterized protein OS=Sus scrofa OX=9823 GN=LOC102158372 PE=4 SV=3	94348	74	12	135	14	236	245	18	135	166	8	41	22	15	23
B2CZF8|B2CZF8_PIG	Milk fat globule-EGF factor 8 protein OS=Sus scrofa OX=9823 PE=2 SV=1	47850	118	9	111	15	392	14	14	38	6	13	41	9	52	151
A0A286ZY29|A0A286ZY29_PIG	Lactadherin OS=Sus scrofa OX=9823 GN=MFGE8 PE=1 SV=1	51168	118	9	111	0	392	14	0	38	6	0	41	9	0	151
A0A287AIU0|A0A287AIU0_PIG	Lactadherin OS=Sus scrofa OX=9823 GN=MFGE8 PE=1 SV=1	54526	118	9	111	0	392	14	0	38	6	0	41	9	0	151
F1S7E5|F1S7E5_PIG	EF-hand domain containing 1 OS=Sus scrofa OX=9823 GN=EFHC1 PE=4 SV=1	74016	103	103	138	80	96	139	78	135	127	114	183	13	9	14
A0A287BMB7|A0A287BMB7_PIG	Tubulin alpha chain OS=Sus scrofa OX=9823 GN=TUBA8 PE=1 SV=1	50045	86	8	95	0	267	578	0	445	473	0	614	63	0	68
A0A287B5H5|A0A287B5H5_PIG	Tubulin alpha chain OS=Sus scrofa OX=9823 GN=TUBA8 PE=1 SV=1	49325	86	8	95	33	0	578	89	0	473	172	0	63	44	0
F1S2W0|F1S2W0_PIG	Family with sequence similarity 71 member A OS=Sus scrofa OX=9823 GN=FAM71A PE=4 SV=2	63984	83	78	118	54	44	95	36	55	100	23	37	4	9	5
A0A286ZU97|A0A286ZU97_PIG	Uncharacterized protein OS=Sus scrofa OX=9823 GN=MTCH2 PE=1 SV=1	33404	73	72	250	207	55	79	43	77	97	41	52	12	27	7
sp|Q29092|ENPL_PIG	Endoplasmin OS=Sus scrofa OX=9823 GN=HSP90B1 PE=2 SV=3	92471	93	61	4	10	10	8	20	0	7	16	1	192	123	40
Q8MI02|Q8MI02_PIG	Hyaluronidase OS=Sus scrofa OX=9823 GN=SPAM-1 PE=1 SV=1	56040	84	84	75	30	194	162	26	134	148	39	131	19	17	44
Q4R0H8|Q4R0H8_PIG	Spermadhesin AWN OS=Sus scrofa OX=9823 GN=AWN PE=2 SV=1	16902	74	74	79	30	61	517	97	67	394	214	89	55	271	11
F1SMZ7|F1SMZ7_PIG	Uncharacterized protein OS=Sus scrofa OX=9823 GN=HSPD1 PE=1 SV=3	60907	98	98	32	48	112	3	11	3	7	0	0	179	31	46
A0A287BM82|A0A287BM82_PIG	Keratin 14 OS=Sus scrofa OX=9823 GN=KRT14 PE=1 SV=1	54199	101	9	31	33	0	24	28	0	55	21	0	440	81	0
F1SF28|F1SF28_PIG	Zona pellucida-binding protein 1 OS=Sus scrofa OX=9823 GN=ZPBP PE=4 SV=2	39610	109	109	85	16	405	73	41	69	72	32	32	5	34	71
sp|Q29108|ZPBP1_PIG	Zona pellucida-binding protein 1 OS=Sus scrofa OX=9823 GN=ZPBP PE=2 SV=1	39624	109	109	85	0	405	73	0	69	72	0	32	5	0	71
A0A287B7V7|A0A287B7V7_PIG	DNA (cytosine-5)-methyltransferase OS=Sus scrofa OX=9823 GN=DNMT1 PE=3 SV=1	184043	125	125	0	0	0	0	0	0	10	0	0	299	0	28
A0A287A8G0|A0A287A8G0_PIG	DNA (cytosine-5)-methyltransferase OS=Sus scrofa OX=9823 GN=DNMT1 PE=3 SV=1	181954	125	125	0	0	0	0	0	0	10	24	0	299	403	28
sp|Q29554|ECHA_PIG	Trifunctional enzyme subunit alpha mitochondrial OS=Sus scrofa OX=9823 GN=HADHA PE=1 SV=1	83107	106	106	48	37	0	3	35	0	2	13	0	46	72	0
A0A287BT68|A0A287BT68_PIG	Uncharacterized protein OS=Sus scrofa OX=9823 GN=LUZP2 PE=1 SV=1	38530	121	121	157	56	234	8	4	25	14	1	6	0	19	23
F1RVX7|F1RVX7_PIG	Family with sequence similarity 166 member A OS=Sus scrofa OX=9823 GN=FAM166A PE=4 SV=1	36265	92	92	149	85	49	133	78	78	117	82	114	4	3	11
F1RJB0|F1RJB0_PIG	Actin related protein T2 OS=Sus scrofa OX=9823 GN=ACTRT2 PE=1 SV=1	41729	81	72	135	189	119	84	62	87	75	32	36	6	17	10
sp|P36968|GPX4_PIG	Phospholipid hydroperoxide glutathione peroxidase OS=Sus scrofa OX=9823 GN=GPX4 PE=1 SV=3	22337	81	19	482	223	143	128	80	154	99	89	134	10	34	16
sp|P00355|G3P_PIG	Glyceraldehyde-3-phosphate dehydrogenase OS=Sus scrofa OX=9823 GN=GAPDH PE=1 SV=4	35836	68	45	68	22	0	45	22	0	65	33	0	51	59	0
A0A286ZVK5|A0A286ZVK5_PIG	Glyceraldehyde-3-phosphate dehydrogenase OS=Sus scrofa OX=9823 GN=GAPDH PE=1 SV=1	37248	68	45	68	0	0	45	0	0	65	0	0	51	0	0
A0A287BBI5|A0A287BBI5_PIG	Glyceraldehyde-3-phosphate dehydrogenase OS=Sus scrofa OX=9823 GN=GAPDH PE=1 SV=1	35051	68	45	68	0	0	45	0	0	65	0	0	51	0	0
A0A287BG23|A0A287BG23_PIG	Glyceraldehyde-3-phosphate dehydrogenase OS=Sus scrofa OX=9823 GN=GAPDH PE=1 SV=1	42567	68	45	68	0	0	45	0	0	65	0	0	51	0	0
A0A287B8J5|A0A287B8J5_PIG	Heat shock protein HSP 90-alpha OS=Sus scrofa OX=9823 GN=HSP90AA1 PE=1 SV=1	90601	88	54	36	0	0	8	0	0	6	0	0	103	0	0
sp|O02705|HS90A_PIG	Heat shock protein HSP 90-alpha OS=Sus scrofa OX=9823 GN=HSP90AA1 PE=2 SV=3	84775	88	54	36	38	134	8	32	1	6	20	0	103	165	21
A0A287AQK7|A0A287AQK7_PIG	Heat shock protein HSP 90-alpha OS=Sus scrofa OX=9823 GN=HSP90AA1 PE=1 SV=1	90640	88	54	36	0	0	8	0	0	6	0	0	103	0	0
A0A287BAY9|A0A287BAY9_PIG	Serum albumin OS=Sus scrofa OX=9823 GN=ALB PE=1 SV=1	74503	81	76	10	0	6	4	0	5	11	0	8	374	0	39
A0A286ZT13|A0A286ZT13_PIG	Serum albumin OS=Sus scrofa OX=9823 GN=ALB PE=1 SV=1	68171	81	76	10	21	6	4	14	5	11	4	8	374	116	39
F1RUN2|F1RUN2_PIG	Serum albumin OS=Sus scrofa OX=9823 GN=ALB PE=1 SV=1	69670	81	76	10	0	6	4	0	5	11	0	8	374	0	39
I3LND4|I3LND4_PIG	Fibronectin type III domain containing 8 OS=Sus scrofa OX=9823 GN=FNDC8 PE=4 SV=2	35106	80	80	120	59	56	120	68	53	96	47	34	11	15	4
A0A287AGU2|A0A287AGU2_PIG	ATP synthase subunit alpha OS=Sus scrofa OX=9823 GN=ATP5F1A PE=1 SV=1	59428	91	91	29	9	179	4	18	7	5	15	1	54	45	49
sp|P80021|ATPA_PIG	ATP synthase subunit alpha mitochondrial OS=Sus scrofa OX=9823 GN=ATP5F1A PE=1 SV=2	59688	91	91	29	0	179	4	0	7	5	0	1	54	0	49
sp|P42098|ZP3_PIG	Zona pellucida sperm-binding protein 3 OS=Sus scrofa OX=9823 GN=ZP3 PE=1 SV=1	46239	67	67	0	0	0	0	0	0	24	4	11	457	47	84
F1RKE0|F1RKE0_PIG	Zona pellucida sperm-binding protein 3 OS=Sus scrofa OX=9823 GN=ZP3 PE=4 SV=1	46213	67	67	0	0	0	0	0	0	24	0	11	457	0	84
A0A287AP52|A0A287AP52_PIG	F-actin-capping protein subunit beta OS=Sus scrofa OX=9823 GN=CAPZB PE=1 SV=1	34446	69	8	55	83	104	131	58	215	116	72	100	16	15	15
F1RNL4|F1RNL4_PIG	Serine/threonine-protein phosphatase OS=Sus scrofa OX=9823 GN=PPP1CC PE=1 SV=3	38548	68	26	118	95	84	98	93	61	79	85	55	16	23	10
sp|Q9TSX5|LDHC_PIG	L-lactate dehydrogenase C chain OS=Sus scrofa OX=9823 GN=LDHC PE=2 SV=3	36053	56	40	21	16	114	115	68	108	95	59	35	10	13	9
F1SFX0|F1SFX0_PIG	L-lactate dehydrogenase OS=Sus scrofa OX=9823 GN=LDHC PE=2 SV=2	36053	56	40	21	0	114	115	0	108	95	0	35	10	0	9
sp|Q28920|SPMI_PIG	Seminal plasma sperm motility inhibitor OS=Sus scrofa OX=9823 GN=SPMI PE=2 SV=2	15203	54	1	157	0	0	596	0	0	547	0	0	70	0	0
A0A287B423|A0A287B423_PIG	Uncharacterized protein OS=Sus scrofa OX=9823 GN=SPESP1 PE=4 SV=1	39862	83	9	50	10	131	30	35	7	30	12	0	5	13	31
F1RT87|F1RT87_PIG	RAB2A member RAS oncogene family OS=Sus scrofa OX=9823 GN=RAB2A PE=1 SV=3	23519	72	38	61	63	90	144	44	113	154	53	44	32	29	16
A0A0B8RSC2|A0A0B8RSC2_PIG	RAB2A member RAS oncogene family OS=Sus scrofa domesticus OX=9825 GN=RAB2A PE=4 SV=1	23519	72	38	61	0	90	144	0	113	154	0	44	32	0	16
F1RPC0|F1RPC0_PIG	Zona pellucida sperm-binding protein 2 OS=Sus scrofa OX=9823 GN=ZP2 PE=4 SV=1	79701	56	2	0	0	0	0	0	0	15	0	0	209	0	0
A0A287AHL5|A0A287AHL5_PIG	Dynein axonemal heavy chain 7 OS=Sus scrofa OX=9823 GN=DNAH7 PE=4 SV=1	460563	113	111	38	13	24	22	72	14	12	32	0	0	1	0
sp|D5K8A9|SACA1_PIG	Sperm acrosome membrane-associated protein 1 OS=Sus scrofa OX=9823 GN=SPACA1 PE=1 SV=1	32239	67	67	86	14	126	219	108	111	139	58	30	16	30	35
sp|P42099|ZP2_PIG	Zona pellucida sperm-binding protein 2 OS=Sus scrofa OX=9823 GN=ZP2 PE=2 SV=2	79729	55	1	0	0	0	0	0	0	15	0	1	209	22	22
F1RGJ3|F1RGJ3_PIG	Heat shock protein family A (Hsp70) member 9 OS=Sus scrofa OX=9823 GN=HSPA9 PE=3 SV=3	66572	78	76	25	0	0	0	0	0	4	0	0	159	0	0
A0A287ADJ2|A0A287ADJ2_PIG	Heat shock protein family A (Hsp70) member 9 OS=Sus scrofa OX=9823 GN=HSPA9 PE=1 SV=1	73651	78	76	25	12	61	0	7	0	4	2	0	159	133	28
A0A286ZNM0|A0A286ZNM0_PIG	Stabilizer of axonemal microtubules 1 OS=Sus scrofa OX=9823 GN=SAXO1 PE=4 SV=1	52513	68	68	53	39	63	103	55	101	104	67	34	5	3	0
F1SA46|F1SA46_PIG	Actin like 9 OS=Sus scrofa OX=9823 GN=ACTL9 PE=3 SV=1	45693	67	67	59	62	60	40	44	19	23	18	9	0	4	7
A0A287BCE6|A0A287BCE6_PIG	Uncharacterized protein OS=Sus scrofa OX=9823 GN=FCGBP PE=1 SV=1	265392	78	78	47	5	2	69	70	0	34	28	0	0	22	0
F1RPD2|F1RPD2_PIG	Ubiquinol-cytochrome c reductase core protein 2 OS=Sus scrofa OX=9823 GN=UQCRC2 PE=1 SV=3	48210	55	55	30	3	76	51	14	62	60	25	40	11	14	10
F1S3A9|F1S3A9_PIG	Polyamine modulated factor 1 binding protein 1 OS=Sus scrofa OX=9823 GN=PMFBP1 PE=4 SV=3	118944	78	2	74	79	0	54	70	0	43	41	0	1	1	0
F1S1R1|F1S1R1_PIG	Cylicin 1 OS=Sus scrofa OX=9823 GN=CYLC1 PE=4 SV=2	74014	73	73	40	82	133	37	63	9	61	41	5	1	10	2
E1CAJ5|E1CAJ5_PIG	Protein disulfide-isomerase OS=Sus scrofa OX=9823 GN=grp-58 PE=2 SV=1	56859	84	3	2	19	2	7	16	0	8	7	0	262	230	124
F1SIK7|F1SIK7_PIG	Dpy-19 like 2 OS=Sus scrofa OX=9823 GN=DPY19L2 PE=4 SV=2	100143	72	69	166	103	0	54	69	69	58	75	41	15	33	4
F1SS88|F1SS88_PIG	Cilia and flagella associated protein 52 OS=Sus scrofa OX=9823 GN=CFAP52 PE=4 SV=3	68118	68	68	13	4	56	100	60	92	48	36	35	3	4	0
F1S5N4|F1S5N4_PIG	Glutathione S-transferase omega 2 OS=Sus scrofa OX=9823 GN=GSTO2 PE=3 SV=1	28350	61	61	271	64	20	135	73	69	161	84	54	11	15	2
I3LT05|I3LT05_PIG	Uncharacterized protein OS=Sus scrofa OX=9823 GN=ROPN1 PE=4 SV=2	23949	59	59	155	165	113	68	62	44	34	54	52	10	28	12
A0A287B749|A0A287B749_PIG	Tubulin beta chain OS=Sus scrofa OX=9823 GN=TUBB6 PE=1 SV=1	45362	73	12	51	14	80	356	54	197	317	71	187	38	26	49
sp|Q1KYT0|ENOB_PIG	Beta-enolase OS=Sus scrofa OX=9823 GN=ENO3 PE=2 SV=1	47130	67	38	18	4	50	18	4	0	4	1	0	165	138	15
B1A3A0|B1A3A0_PIG	Beta-enolase 3 transcript variant 1 OS=Sus scrofa OX=9823 GN=ENO3 PE=2 SV=1	47130	67	38	18	0	50	18	0	0	4	0	0	165	0	15
C8C4M8|C8C4M8_PIG	Zona pellucida binding protein 2 OS=Sus scrofa OX=9823 GN=ZPBP2 PE=1 SV=1	37181	73	73	169	10	108	8	6	6	8	3	3	2	6	29
sp|Q07287|ZP4_PIG	Zona pellucida sperm-binding protein 4 OS=Sus scrofa OX=9823 GN=ZP4 PE=1 SV=1	59334	64	64	0	0	0	0	0	0	36	2	3	419	27	33
I3L912|I3L912_PIG	Uncharacterized protein OS=Sus scrofa OX=9823 PE=4 SV=2	152820	77	77	111	78	10	85	70	53	52	27	34	7	9	1
A0A0B8RSY9|A0A0B8RSY9_PIG	Enolase 1 (Alpha) OS=Sus scrofa domesticus OX=9825 GN=ENO1 PE=3 SV=1	47288	74	51	34	6	115	10	7	0	5	1	0	74	77	32
I3LK59|I3LK59_PIG	Enolase 1 OS=Sus scrofa OX=9823 GN=ENO1 PE=1 SV=2	47288	74	51	34	0	115	10	0	0	5	0	0	74	0	32
Q6YT39|Q6YT39_PIG	Lactotransferrin OS=Sus scrofa OX=9823 GN=LTF PE=1 SV=1	77612	66	1	3	0	0	42	0	0	58	0	0	9	0	0
F1S8J6|F1S8J6_PIG	RAB2B member RAS oncogene family OS=Sus scrofa OX=9823 GN=RAB2B PE=1 SV=1	24236	70	36	94	107	75	83	41	99	97	48	34	17	33	11
F1S8P1|F1S8P1_PIG	Uncharacterized protein OS=Sus scrofa OX=9823 GN=SCCPDH PE=1 SV=3	47333	59	59	56	135	90	26	52	18	24	33	2	14	37	9
F1RS61|F1RS61_PIG	EF-hand domain family member B OS=Sus scrofa OX=9823 GN=EFHB PE=4 SV=3	96167	68	68	66	62	34	57	62	37	48	63	47	3	0	0
Q8WMN8|Q8WMN8_PIG	Lactoferrin (Fragment) OS=Sus scrofa OX=9823 GN=LTF PE=2 SV=1	77682	66	1	3	0	27	42	0	17	60	0	25	9	0	1
D5K893|D5K893_PIG	Sperm equatorial segment protein 1 OS=Sus scrofa OX=9823 GN=SPESP1 PE=2 SV=1	39863	75	1	38	0	112	27	0	7	18	0	0	5	0	27
A0A287B2H7|A0A287B2H7_PIG	L-lactate dehydrogenase OS=Sus scrofa OX=9823 GN=LDHA PE=1 SV=1	39754	61	7	24	69	69	93	84	77	58	125	34	7	18	11
A0A287B8F3|A0A287B8F3_PIG	Fructose-bisphosphate aldolase OS=Sus scrofa OX=9823 GN=ALDOA PE=1 SV=1	44999	57	50	27	13	57	57	35	56	79	9	3	13	25	6
A0A287BH52|A0A287BH52_PIG	Keratin 5 OS=Sus scrofa OX=9823 GN=KRT5 PE=1 SV=1	60500	63	2	23	0	0	9	0	0	34	0	0	353	0	0
sp|P00346|MDHM_PIG	Malate dehydrogenase mitochondrial OS=Sus scrofa OX=9823 GN=MDH2 PE=1 SV=2	35603	57	57	31	13	48	2	11	1	2	7	0	55	44	13
I3LP41|I3LP41_PIG	Malate dehydrogenase OS=Sus scrofa OX=9823 GN=MDH2 PE=3 SV=2	41996	57	57	31	0	48	2	0	1	2	0	0	55	0	13
A0A287AA61|A0A287AA61_PIG	Centrosomal protein 135 OS=Sus scrofa OX=9823 GN=CEP135 PE=4 SV=1	132950	84	84	66	57	37	60	68	61	54	56	40	0	0	0
K9IW73|K9IW73_PIG	Dihydrolipoyllysine-residue succinyltransferase OS=Sus scrofa OX=9823 GN=DLST-tv1 PE=2 SV=1	48993	75	75	5	1	20	1	4	0	0	2	10	210	91	27
sp|Q9N0F1|ODO2_PIG	Dihydrolipoyllysine-residue succinyltransferase component of 2-oxoglutarate dehydrogenase complex mitochondrial OS=Sus scrofa OX=9823 GN=DLST PE=1 SV=1	48977	75	75	5	0	20	1	0	0	0	0	10	210	0	27
F1RYX9|F1RYX9_PIG	Armadillo repeat containing 12 OS=Sus scrofa OX=9823 GN=ARMC12 PE=4 SV=2	38747	71	71	101	103	29	94	98	75	77	81	55	2	15	6
A0A287BLV7|A0A287BLV7_PIG	NADH:ubiquinone oxidoreductase core subunit S1 OS=Sus scrofa OX=9823 GN=NDUFS1 PE=1 SV=1	79540	65	65	28	9	56	83	25	48	60	23	3	17	11	4
F1SKP4|F1SKP4_PIG	Phospholipase A2 group VI OS=Sus scrofa OX=9823 GN=PLA2G6 PE=1 SV=3	89753	60	60	85	73	20	50	56	33	34	36	26	0	0	0
D0G0C8|D0G0C8_PIG	Chaperonin containing TCP1 subunit 2 OS=Sus scrofa OX=9823 GN=CCT2 PE=1 SV=1	57444	67	67	27	41	51	36	26	20	40	31	6	20	17	9
F1SUQ9|F1SUQ9_PIG	Peptidyl arginine deiminase 6 OS=Sus scrofa OX=9823 GN=PADI6 PE=2 SV=2	76926	79	79	0	0	0	0	0	0	8	2	3	226	243	18
A0A287ADK3|A0A287ADK3_PIG	Aldehyde dehydrogenase 7 family member A1 OS=Sus scrofa OX=9823 GN=ALDH7A1 PE=1 SV=1	55456	66	66	1	0	4	0	0	0	2	0	1	194	0	12
A0A286ZL79|A0A286ZL79_PIG	Aldehyde dehydrogenase 7 family member A1 OS=Sus scrofa OX=9823 GN=ALDH7A1 PE=1 SV=1	58561	66	66	1	0	4	0	0	0	2	0	1	194	0	12
F1SA70|F1SA70_PIG	Heat shock protein family A (Hsp70) member 2 OS=Sus scrofa OX=9823 GN=HSPA2 PE=1 SV=2	69025	67	41	32	57	36	42	55	21	54	36	10	32	49	13
F1SFT7|F1SFT7_PIG	Uncharacterized protein OS=Sus scrofa OX=9823 PE=4 SV=2	54899	68	68	63	49	61	49	61	40	34	10	18	4	3	1
sp|Q8WNW3|PLAK_PIG	Junction plakoglobin OS=Sus scrofa OX=9823 GN=Jup PE=2 SV=1	81850	53	45	11	23	0	17	13	0	9	28	0	170	58	0
F6Q109|F6Q109_PIG	Glutamine synthetase OS=Sus scrofa OX=9823 GN=GLUL PE=3 SV=1	42916	56	56	108	56	77	94	54	51	50	37	12	2	11	7
F6PXR6|F6PXR6_PIG	Uncharacterized protein OS=Sus scrofa OX=9823 GN=FHL1 PE=1 SV=1	36401	65	11	75	0	0	18	0	0	19	0	0	1	0	0
Q9GJV4|Q9GJV4_PIG	Four and a half LIM domains 1 protein isoform C OS=Sus scrofa OX=9823 GN=fhl1C PE=2 SV=1	33667	65	11	75	0	0	18	0	0	19	0	0	1	0	0
K7GLQ8|K7GLQ8_PIG	Uncharacterized protein OS=Sus scrofa OX=9823 GN=FHL1 PE=1 SV=2	31999	65	11	75	55	49	18	35	15	19	30	5	1	7	0
K7GSI9|K7GSI9_PIG	Uncharacterized protein OS=Sus scrofa OX=9823 GN=FHL1 PE=4 SV=2	38750	65	11	75	0	0	18	0	0	19	0	0	1	0	0
F1ST22|F1ST22_PIG	Dynein axonemal heavy chain 2 OS=Sus scrofa OX=9823 GN=DNAH2 PE=4 SV=3	499887	77	76	23	9	10	59	60	2	38	34	2	1	0	0
F1RRW4|F1RRW4_PIG	Angiotensin-converting enzyme OS=Sus scrofa OX=9823 GN=ACE PE=1 SV=2	84816	68	2	43	11	85	25	20	5	12	19	1	4	11	23
F1RPN9|F1RPN9_PIG	Malic enzyme OS=Sus scrofa OX=9823 GN=ME2 PE=1 SV=3	65650	66	66	0	0	0	0	0	0	6	14	12	151	110	3
A0A286ZN09|A0A286ZN09_PIG	Uncharacterized protein OS=Sus scrofa OX=9823 PE=4 SV=1	73962	48	6	81	0	0	73	0	0	87	0	0	11	0	0
Q4R0H3|Q4R0H3_PIG	Spermadhesin AQN-1 OS=Sus scrofa OX=9823 GN=AQN-1 PE=2 SV=1	13989	44	41	38	0	4	138	0	9	109	0	5	20	0	0
I3L8Z8|I3L8Z8_PIG	Uncharacterized protein OS=Sus scrofa OX=9823 GN=LOC100514982 PE=1 SV=2	96079	51	17	95	12	171	156	13	89	111	4	26	13	10	22
F1RRW5|F1RRW5_PIG	Angiotensin-converting enzyme OS=Sus scrofa OX=9823 GN=ACE PE=1 SV=3	150311	67	1	42	0	85	25	0	5	12	0	1	4	0	23
A0A0B8RT86|A0A0B8RT86_PIG	Succinate dehydrogenase [ubiquinone] flavoprotein subunit mitochondrial OS=Sus scrofa domesticus OX=9825 GN=SDHA PE=3 SV=1	72832	64	64	30	24	67	0	8	1	2	7	1	23	16	3
sp|Q0QF01|SDHA_PIG	Succinate dehydrogenase [ubiquinone] flavoprotein subunit mitochondrial OS=Sus scrofa OX=9823 GN=SDHA PE=1 SV=2	72832	64	64	30	0	67	0	0	1	2	0	1	23	0	3
K9IW70|K9IW70_PIG	Acetyltransferase component of pyruvate dehydrogenase complex OS=Sus scrofa OX=9823 GN=DLAT PE=2 SV=1	69188	73	5	33	13	66	72	21	1	22	17	1	28	31	5
F1SGG3|F1SGG3_PIG	Keratin 1 OS=Sus scrofa OX=9823 GN=KRT1 PE=1 SV=2	64874	67	40	39	42	0	48	57	3	45	48	7	765	141	22
A5A758|A5A758_PIG	Keratin 1 (Fragment) OS=Sus scrofa OX=9823 GN=KRT1 PE=2 SV=1	65207	67	40	39	0	0	48	0	3	45	0	7	765	0	22
K9IVI1|K9IVI1_PIG	2-oxoglutarate dehydrogenase mitochondrial OS=Sus scrofa OX=9823 GN=OGDH PE=1 SV=1	115640	89	76	53	27	85	3	21	0	2	12	0	75	64	3
K7GMX6|K7GMX6_PIG	Uncharacterized protein OS=Sus scrofa OX=9823 GN=GK PE=1 SV=2	57437	46	1	31	17	36	83	45	96	79	50	43	7	9	10
A0A287BBB5|A0A287BBB5_PIG	VAMP associated protein A OS=Sus scrofa OX=9823 GN=VAPA PE=1 SV=1	32235	56	6	83	77	16	17	37	5	12	4	3	2	11	1
F1SDN2|F1SDN2_PIG	Uncharacterized protein OS=Sus scrofa OX=9823 GN=HADHB PE=1 SV=2	51250	68	68	28	24	76	2	18	0	0	8	0	19	27	4
I3LC61|I3LC61_PIG	Uncharacterized protein OS=Sus scrofa OX=9823 PE=4 SV=2	47273	59	59	27	3	77	66	29	9	59	36	3	4	3	3
F1S9Q1|F1S9Q1_PIG	Uncharacterized protein OS=Sus scrofa OX=9823 GN=HSPA8 PE=1 SV=3	70866	61	33	29	32	22	34	26	9	35	18	5	83	130	28
F1S9Q3|F1S9Q3_PIG	Uncharacterized protein OS=Sus scrofa OX=9823 GN=HSPA8 PE=1 SV=3	71882	61	33	29	0	22	34	0	9	35	0	5	83	0	28
Q2EHH8|Q2EHH8_PIG	Serine/threonine-protein phosphatase OS=Sus scrofa OX=9823 GN=PPP1CA PE=1 SV=1	37512	43	1	100	0	0	92	0	0	60	0	0	14	0	0
A0A286ZL42|A0A286ZL42_PIG	Serine/threonine-protein phosphatase OS=Sus scrofa OX=9823 GN=PPP1CA PE=1 SV=1	38364	43	1	100	0	0	92	0	0	60	0	0	14	0	0
I3LDM6|I3LDM6_PIG	Keratin 3 OS=Sus scrofa OX=9823 GN=KRT3 PE=1 SV=2	64800	53	13	18	24	0	18	31	0	31	18	4	306	94	8
A0A287BI14|A0A287BI14_PIG	Chromosome 7 open reading frame 31 OS=Sus scrofa OX=9823 GN=C7orf31 PE=4 SV=1	67440	56	56	74	36	30	53	50	57	39	36	58	0	0	0
C0MHR2|C0MHR2_PIG	Clathrin heavy chain OS=Sus scrofa OX=9823 GN=CLTC PE=1 SV=1	191613	72	72	21	0	25	7	0	2	5	0	0	95	0	1
I3LGD4|I3LGD4_PIG	Clathrin heavy chain OS=Sus scrofa OX=9823 GN=CLTC PE=1 SV=2	189395	72	72	21	61	25	7	40	2	5	22	0	95	168	1
A0A287AL41|A0A287AL41_PIG	Parkin coregulated OS=Sus scrofa OX=9823 GN=PACRG PE=4 SV=1	29373	39	39	15	16	32	98	37	40	98	57	48	8	3	3
F1RRU4|F1RRU4_PIG	EF-hand calcium binding domain 3 OS=Sus scrofa OX=9823 GN=EFCAB3 PE=4 SV=1	49802	44	44	53	104	25	46	41	35	37	71	40	0	0	0
A0A287AC42|A0A287AC42_PIG	VAMP associated protein A OS=Sus scrofa OX=9823 GN=VAPA PE=1 SV=1	27718	52	2	79	73	0	17	36	0	12	4	0	2	11	0
F1SB63|F1SB63_PIG	Uncharacterized protein OS=Sus scrofa OX=9823 GN=TCP1 PE=1 SV=2	60653	47	47	23	19	68	32	25	11	27	35	5	20	24	10
A0A287BMQ2|A0A287BMQ2_PIG	Actin related protein T3 OS=Sus scrofa OX=9823 GN=ACTRT3 PE=1 SV=1	41107	47	47	42	75	78	18	41	30	12	19	11	6	9	2
D2SW96|D2SW96_PIG	L-lactate dehydrogenase OS=Sus scrofa OX=9823 PE=2 SV=1	36591	51	1	14	0	0	58	0	0	40	0	0	5	0	0
A0A287AMZ2|A0A287AMZ2_PIG	T-complex protein 1 subunit gamma OS=Sus scrofa OX=9823 GN=CCT3 PE=1 SV=1	60654	58	58	25	35	53	40	31	14	34	26	4	40	16	4
F1SP30|F1SP30_PIG	Actin like 7B OS=Sus scrofa OX=9823 GN=ACTL7B PE=3 SV=1	45511	49	49	60	84	56	40	52	30	21	17	7	3	4	5
F1RVJ8|F1RVJ8_PIG	Armadillo repeat containing 4 OS=Sus scrofa OX=9823 GN=ARMC4 PE=4 SV=3	112898	57	57	47	0	36	18	0	10	17	0	4	0	0	1
A0A287BDJ3|A0A287BDJ3_PIG	Armadillo repeat containing 4 OS=Sus scrofa OX=9823 GN=ARMC4 PE=4 SV=1	116832	57	57	47	66	36	18	34	10	17	24	4	0	0	1
B6VNT8|B6VNT8_PIG	Cardiac muscle alpha actin 1 OS=Sus scrofa OX=9823 GN=ACTC1 PE=2 SV=1	42019	41	7	21	18	0	43	18	0	42	14	0	91	42	0
I3LR32|I3LR32_PIG	T-complex protein 1 subunit epsilon OS=Sus scrofa OX=9823 GN=CCT5 PE=1 SV=2	59664	50	49	16	35	44	33	17	12	26	16	0	13	5	8
A0A0K0KW08|A0A0K0KW08_PIG	L-lactate dehydrogenase OS=Sus scrofa OX=9823 GN=LDHAL6B PE=2 SV=1	41861	51	46	65	63	98	17	28	8	5	20	5	4	14	17
F1SA43|F1SA43_PIG	Family with sequence similarity 71 member D OS=Sus scrofa OX=9823 GN=FAM71D PE=4 SV=2	44240	51	51	76	45	22	80	61	43	56	21	20	5	8	2
D0G0C9|D0G0C9_PIG	T-complex protein 1 subunit eta OS=Sus scrofa OX=9823 GN=CCT7 PE=1 SV=1	59474	51	51	14	41	48	28	18	6	25	19	1	19	16	4
A0A286ZP34|A0A286ZP34_PIG	HYDIN axonemal central pair apparatus protein OS=Sus scrofa OX=9823 GN=HYDIN PE=4 SV=1	565224	72	72	17	5	20	67	44	26	40	29	3	0	0	0
F1RXB7|F1RXB7_PIG	Leucine rich repeat and coiled-coil centrosomal protein 1 OS=Sus scrofa OX=9823 GN=LRRCC1 PE=4 SV=3	113249	50	6	53	57	12	50	51	42	37	44	32	0	0	0
D5K8A1|D5K8A1_PIG	Spermatogenesis associated 6 OS=Sus scrofa OX=9823 GN=SPATA6 PE=2 SV=1	56013	46	46	42	55	29	31	55	31	29	54	30	0	2	0
A0A286ZJB1|A0A286ZJB1_PIG	Uncharacterized protein OS=Sus scrofa OX=9823 PE=4 SV=1	28164	42	42	28	21	82	115	60	44	148	32	23	16	9	8
C1PIG4|C1PIG4_PIG	cAMP-dependent protein kinase regulatory subunit type II alpha OS=Sus scrofa OX=9823 GN=PRKAR2A PE=1 SV=1	45125	48	39	61	48	158	13	37	8	10	24	8	6	12	22
F1SAF0|F1SAF0_PIG	Dihydrolipoyl dehydrogenase OS=Sus scrofa OX=9823 GN=DLD PE=1 SV=1	54219	43	43	30	4	69	3	6	0	3	0	2	51	29	15
F1RPW8|F1RPW8_PIG	Asparaginase like 1 OS=Sus scrofa OX=9823 GN=ASRGL1 PE=1 SV=3	32091	39	39	65	98	198	13	33	6	9	20	4	1	14	24
F1SKM0|F1SKM0_PIG	Ubiquinol-cytochrome c reductase core protein 1 OS=Sus scrofa OX=9823 GN=UQCRC1 PE=1 SV=2	50607	50	50	16	2	0	42	19	0	39	21	0	19	12	0
A0A287AJH5|A0A287AJH5_PIG	Ubiquinol-cytochrome c reductase core protein 1 OS=Sus scrofa OX=9823 GN=UQCRC1 PE=1 SV=1	52827	50	50	16	0	56	42	0	52	39	0	33	19	0	1
A0A287A558|A0A287A558_PIG	Ubiquinol-cytochrome c reductase core protein 1 OS=Sus scrofa OX=9823 GN=UQCRC1 PE=1 SV=1	57836	50	50	16	0	0	42	0	0	39	0	0	19	0	0
A0A286ZPG4|A0A286ZPG4_PIG	Filamin B OS=Sus scrofa OX=9823 GN=FLNB PE=1 SV=1	278931	76	73	8	0	4	3	0	0	0	0	0	84	0	5
A0A287BLE0|A0A287BLE0_PIG	Filamin B OS=Sus scrofa OX=9823 GN=FLNB PE=1 SV=1	281396	76	73	8	0	4	3	0	0	0	0	0	84	0	5
A0A287BGW3|A0A287BGW3_PIG	Filamin B OS=Sus scrofa OX=9823 GN=FLNB PE=1 SV=1	277824	76	73	8	13	4	3	5	0	0	0	0	84	109	5
F1SGH5|F1SGH5_PIG	Uncharacterized protein OS=Sus scrofa OX=9823 GN=PDHB PE=1 SV=1	39273	51	51	51	39	73	8	31	5	4	13	0	25	26	18
I3LP02|I3LP02_PIG	Acetyl-CoA acetyltransferase 1 OS=Sus scrofa OX=9823 GN=ACAT1 PE=1 SV=2	45330	40	40	3	5	23	0	6	0	0	1	0	78	36	7
F1S7L6|F1S7L6_PIG	UBX domain protein 6 OS=Sus scrofa OX=9823 GN=UBXN6 PE=1 SV=2	55592	36	36	47	39	9	34	37	16	30	19	14	2	0	0
A0A287ATD0|A0A287ATD0_PIG	Keratin 75 OS=Sus scrofa OX=9823 GN=KRT75 PE=1 SV=1	58738	42	14	13	0	0	10	0	0	21	0	0	223	0	0
F1RFM8|F1RFM8_PIG	Dynein axonemal heavy chain 10 OS=Sus scrofa OX=9823 GN=DNAH10 PE=4 SV=3	528786	78	76	22	12	1	15	38	1	15	22	0	0	1	0
A0A287A1G6|A0A287A1G6_PIG	Uncharacterized protein OS=Sus scrofa OX=9823 GN=HK1 PE=1 SV=1	102294	52	50	35	50	65	6	12	4	5	11	1	0	7	0
F1RQP0|F1RQP0_PIG	Uncharacterized protein OS=Sus scrofa OX=9823 GN=PRDX5 PE=1 SV=2	17266	40	40	47	64	184	19	23	26	18	13	5	11	37	58
sp|Q6S4N2|HS71B_PIG	Heat shock 70 kDa protein 1B OS=Sus scrofa OX=9823 GN=HSPA1B PE=2 SV=1	70098	53	16	33	17	0	19	14	0	16	5	0	67	76	0
A5A8V6|A5A8V6_PIG	Heat shock 70kDa protein 1A OS=Sus scrofa OX=9823 GN=HSPA1A PE=3 SV=1	70098	53	16	33	0	0	19	0	0	16	0	0	67	0	0
F1RTJ0|F1RTJ0_PIG	Uncharacterized protein OS=Sus scrofa OX=9823 GN=LOC100154405 PE=3 SV=1	41868	38	29	39	38	8	27	21	29	34	13	18	3	2	1
F1RGN9|F1RGN9_PIG	Tektin 1 OS=Sus scrofa OX=9823 GN=TEKT1 PE=4 SV=3	48356	43	42	12	4	39	41	15	55	61	44	78	2	0	7
B5KJG2|B5KJG2_PIG	Phosphoglycerate mutase OS=Sus scrofa OX=9823 GN=PGAM2 PE=1 SV=1	28677	51	39	24	18	120	16	13	6	16	11	8	15	13	6
A0A287AIB2|A0A287AIB2_PIG	Glycerol-3-phosphate dehydrogenase OS=Sus scrofa OX=9823 GN=GPD2 PE=1 SV=1	80721	59	59	45	0	60	5	0	8	2	0	1	0	0	0
I6R469|I6R469_PIG	Calcium binding tyrosine-(Y)-phosphorylation regulated transcript variant 3 OS=Sus scrofa OX=9823 GN=CABYR PE=2 SV=1	41275	55	24	47	11	54	18	16	7	16	2	2	3	3	7
I3LBP3|I3LBP3_PIG	Maestro heat like repeat family member 2B OS=Sus scrofa OX=9823 GN=MROH2B PE=4 SV=2	179800	57	57	19	26	29	1	11	0	0	4	0	0	44	0
F1SBT8|F1SBT8_PIG	Uncharacterized protein OS=Sus scrofa OX=9823 GN=ACSBG2 PE=1 SV=2	68193	44	44	36	43	30	2	13	0	1	9	0	0	4	0
F1SM62|F1SM62_PIG	RIB43A domain with coiled-coils 2 OS=Sus scrofa OX=9823 GN=RIBC2 PE=4 SV=3	44925	41	41	34	24	27	46	21	19	47	36	54	1	0	0
D5K8A6|D5K8A6_PIG	Sperm associated antigen 4-like protein OS=Sus scrofa OX=9823 GN=SPAG4L PE=2 SV=1	43833	42	42	56	34	0	30	17	4	35	47	6	0	2	0
sp|P61292|PP1B_PIG	Serine/threonine-protein phosphatase PP1-beta catalytic subunit OS=Sus scrofa OX=9823 GN=PPP1CB PE=1 SV=3	37187	34	5	86	55	53	77	61	45	51	62	42	13	12	4
F1SSA1|F1SSA1_PIG	Chromosome 1 open reading frame 56 OS=Sus scrofa OX=9823 GN=C1orf56 PE=1 SV=2	37745	41	41	180	8	260	23	49	16	11	6	0	5	17	107
C4TP28|C4TP28_PIG	Phosphatidylethanolamine-binding protein 4 OS=Sus scrofa OX=9823 GN=pebp4 PE=1 SV=1	25177	37	37	74	16	207	22	10	9	13	10	3	8	14	33
sp|Q7YR83|ESPB1_PIG	Epididymal sperm-binding protein 1 OS=Sus scrofa OX=9823 GN=ELSPBP1 PE=1 SV=1	26199	45	45	86	0	101	43	0	36	14	0	13	3	0	16
F1RLA2|F1RLA2_PIG	Epididymal sperm-binding protein 1 OS=Sus scrofa OX=9823 GN=ELSPBP1 PE=4 SV=2	26230	45	45	86	19	101	43	31	36	14	20	13	3	7	16
F1STB9|F1STB9_PIG	Testis expressed 37 OS=Sus scrofa OX=9823 GN=TEX37 PE=4 SV=1	20624	37	37	95	40	15	58	54	38	43	44	41	1	1	1
A0A286ZR68|A0A286ZR68_PIG	Uncharacterized protein OS=Sus scrofa OX=9823 GN=HSP90AB1 PE=1 SV=1	83967	48	9	17	0	57	2	0	0	1	0	0	58	0	13
A0A287A9T4|A0A287A9T4_PIG	Uncharacterized protein OS=Sus scrofa OX=9823 GN=HSP90AB1 PE=1 SV=1	81421	48	9	17	0	57	2	0	0	1	0	0	58	0	13
F1RQU2|F1RQU2_PIG	Uncharacterized protein OS=Sus scrofa OX=9823 GN=HSP90AB1 PE=1 SV=1	83253	48	9	17	23	57	2	21	0	1	5	0	58	85	13
I3L7T4|I3L7T4_PIG	Lon protease homolog mitochondrial OS=Sus scrofa OX=9823 GN=LONP1 PE=1 SV=2	106899	67	67	16	12	56	1	9	1	0	3	0	47	31	11
Q0PY11|Q0PY11_PIG	Elongation factor 1-alpha OS=Sus scrofa OX=9823 GN=EEF1A PE=1 SV=1	50141	44	27	44	0	9	29	0	17	30	0	12	34	0	5
A0A286ZUI3|A0A286ZUI3_PIG	Eukaryotic translation elongation factor 1 alpha 1 OS=Sus scrofa OX=9823 GN=EEF1A1 PE=1 SV=1	46662	44	27	44	49	9	29	46	17	30	43	12	34	25	5
A0A288CG57|A0A288CG57_PIG	Elongation factor 1-alpha OS=Sus scrofa OX=9823 GN=EEF1A1 PE=1 SV=1	48943	44	27	44	0	9	29	0	17	30	0	12	34	0	5
F2Z5G3|F2Z5G3_PIG	Calmodulin 2 OS=Sus scrofa OX=9823 GN=CALM2 PE=1 SV=1	16838	38	25	32	4	37	62	19	36	45	9	18	13	16	20
I3LDS3|I3LDS3_PIG	Keratin 10 OS=Sus scrofa OX=9823 GN=KRT10 PE=1 SV=2	58980	39	11	14	43	2	19	63	7	44	45	5	240	91	21
F1S9K1|F1S9K1_PIG	Isoleucyl-tRNA synthetase 2 mitochondrial OS=Sus scrofa OX=9823 GN=IARS2 PE=1 SV=3	113521	49	49	10	0	23	0	0	0	2	0	0	56	0	3
F1RTI5|F1RTI5_PIG	Coiled-coil alpha-helical rod protein 1 OS=Sus scrofa OX=9823 GN=CCHCR1 PE=4 SV=3	96149	34	34	38	0	13	19	0	23	20	0	22	0	0	0
F2Z5I5|F2Z5I5_PIG	Uncharacterized protein OS=Sus scrofa OX=9823 GN=CSNK2A1 PE=1 SV=1	45144	34	33	13	3	64	49	15	24	26	36	17	12	16	1
F1RZ12|F1RZ12_PIG	T-complex 11 OS=Sus scrofa OX=9823 GN=TCP11 PE=4 SV=3	55552	33	33	37	55	15	34	41	23	26	45	14	1	4	0
A0A287AAP0|A0A287AAP0_PIG	Uncharacterized protein OS=Sus scrofa OX=9823 GN=LOC100522130 PE=1 SV=1	34339	33	28	12	13	22	2	12	4	2	9	2	53	41	13
I3LSM7|I3LSM7_PIG	MICOS complex subunit MIC60 OS=Sus scrofa OX=9823 GN=IMMT PE=1 SV=2	79091	48	48	13	0	0	1	0	0	1	0	0	5	0	0
A0A287A2N6|A0A287A2N6_PIG	MICOS complex subunit MIC60 OS=Sus scrofa OX=9823 GN=IMMT PE=1 SV=1	75567	48	48	13	0	0	1	0	0	1	0	0	5	0	0
F1RIU3|F1RIU3_PIG	Chaperonin containing TCP1 subunit 6B OS=Sus scrofa OX=9823 GN=CCT6B PE=3 SV=2	57894	34	19	13	23	27	35	19	11	41	23	12	3	2	3
Q4R0H6|Q4R0H6_PIG	Spermadhesin PSP-I OS=Sus scrofa OX=9823 GN=PSP-I PE=2 SV=1	14501	37	7	36	18	10	43	20	7	48	23	3	23	74	11
A0A286ZPA9|A0A286ZPA9_PIG	Uncharacterized protein OS=Sus scrofa OX=9823 GN=PSP-I PE=4 SV=1	14467	37	7	36	0	10	43	0	7	48	0	3	23	0	11
sp|P35495|PSP1_PIG	Major seminal plasma glycoprotein PSP-I OS=Sus scrofa OX=9823 PE=1 SV=2	14501	37	7	36	0	10	43	0	7	48	0	3	23	0	11
F1RZG8|F1RZG8_PIG	Meiosis specific nuclear structural 1 OS=Sus scrofa OX=9823 GN=MNS1 PE=4 SV=3	59922	46	46	33	46	36	43	38	44	52	51	72	3	0	0
F1SAI8|F1SAI8_PIG	Hypoxia up-regulated 1 OS=Sus scrofa OX=9823 GN=HYOU1 PE=1 SV=2	111496	48	48	3	4	3	9	24	0	3	3	0	65	23	15
A0A286ZIH0|A0A286ZIH0_PIG	Hypoxia up-regulated 1 OS=Sus scrofa OX=9823 GN=HYOU1 PE=1 SV=1	109790	48	48	3	0	3	9	0	0	3	0	0	65	0	15
K9IWD4|K9IWD4_PIG	Hypoxia up-regulated protein 1 OS=Sus scrofa OX=9823 GN=HYOU1_tv1 PE=2 SV=1	111396	48	48	3	0	3	9	0	0	3	0	0	65	0	15
K9IVC8|K9IVC8_PIG	Nardilysin convertase OS=Sus scrofa OX=9823 GN=NRD1_tv2 PE=1 SV=1	133163	48	48	41	46	1	24	46	7	6	20	2	1	0	0
A0A0B8S072|A0A0B8S072_PIG	3-hydroxyisobutyrate dehydrogenase OS=Sus scrofa domesticus OX=9825 GN=HIBADH PE=4 SV=1	35392	34	34	12	5	27	0	1	0	0	1	1	44	28	10
F1SHU0|F1SHU0_PIG	3-hydroxyisobutyrate dehydrogenase OS=Sus scrofa OX=9823 GN=HIBADH PE=1 SV=3	35392	34	34	12	0	27	0	0	0	0	0	1	44	0	10
D9D839|D9D839_PIG	Superoxide dismutase [Cu-Zn] OS=Sus scrofa OX=9823 GN=SOD1 PE=2 SV=1	15892	34	34	9	4	57	0	0	3	0	0	0	4	12	10
sp|P04178|SODC_PIG	Superoxide dismutase [Cu-Zn] OS=Sus scrofa OX=9823 GN=SOD1 PE=1 SV=2	15892	34	34	9	0	57	0	0	3	0	0	0	4	0	10
Q95ME5|Q95ME5_PIG	Superoxide dismutase 1 (Fragment) OS=Sus scrofa OX=9823 GN=SOD1 PE=2 SV=1	15246	34	34	9	0	0	0	0	0	0	0	0	4	0	0
F1RH55|F1RH55_PIG	Vaccinia related kinase 3 OS=Sus scrofa OX=9823 GN=VRK3 PE=4 SV=2	52886	40	40	67	47	23	36	29	26	20	19	13	2	4	0
F1SQN1|F1SQN1_PIG	T-complex protein 1 subunit delta OS=Sus scrofa OX=9823 GN=CCT4 PE=1 SV=1	58057	45	44	19	17	41	29	25	15	26	18	1	17	9	3
Q9GLE7|Q9GLE7_PIG	Ferritin (Fragment) OS=Sus scrofa OX=9823 PE=2 SV=1	18274	29	11	29	30	16	35	16	35	28	19	41	2	4	0
F1RIP3|F1RIP3_PIG	Ferritin OS=Sus scrofa OX=9823 GN=FTL PE=1 SV=2	19993	29	11	29	0	16	35	0	35	28	0	41	2	0	0
I3LCI2|I3LCI2_PIG	Pyruvate dehydrogenase E1 component subunit alpha OS=Sus scrofa OX=9823 GN=PDHA1 PE=1 SV=1	43365	51	51	37	35	97	3	28	7	1	26	0	31	41	14
sp|P29804|ODPA_PIG	Pyruvate dehydrogenase E1 component subunit alpha somatic form mitochondrial (Fragment) OS=Sus scrofa OX=9823 GN=PDHA1 PE=1 SV=1	43121	51	51	37	0	0	3	0	0	1	0	0	31	0	0
A0A287BPA2|A0A287BPA2_PIG	Translocase of outer mitochondrial membrane 34 OS=Sus scrofa OX=9823 GN=TOMM34 PE=1 SV=1	34553	51	51	48	38	15	35	38	22	27	19	7	6	17	0
sp|P35496|PSP2_PIG	Major seminal plasma glycoprotein PSP-II OS=Sus scrofa OX=9823 PE=1 SV=2	14816	35	11	46	0	0	100	0	0	83	0	0	13	0	0
Q4R0H5|Q4R0H5_PIG	Spermadhesin PSP-II OS=Sus scrofa OX=9823 GN=PSP-II PE=2 SV=1	14802	35	11	46	9	0	100	10	0	83	11	0	13	40	0
I3LD43|I3LD43_PIG	Cytosol aminopeptidase OS=Sus scrofa OX=9823 GN=LAP3 PE=1 SV=2	56047	48	47	10	2	52	0	1	0	0	0	0	40	22	13
F1RP44|F1RP44_PIG	Uncharacterized protein OS=Sus scrofa OX=9823 GN=IPO5 PE=1 SV=2	123625	39	39	39	54	0	25	51	12	16	29	13	0	13	0
F1SKK4|F1SKK4_PIG	Transmembrane protein 89 OS=Sus scrofa OX=9823 GN=TMEM89 PE=4 SV=2	21905	25	25	85	223	10	103	127	51	53	184	27	4	13	6
A0A287AEH4|A0A287AEH4_PIG	Uncharacterized protein OS=Sus scrofa OX=9823 PE=4 SV=1	27523	42	42	70	41	7	26	31	19	15	6	7	1	1	0
I3LPE2|I3LPE2_PIG	Tubulin polymerization promoting protein family member 2 OS=Sus scrofa OX=9823 GN=TPPP2 PE=1 SV=2	18539	41	41	25	5	125	2	2	3	2	0	0	1	4	12
I3LH70|I3LH70_PIG	Collagen type XVIII alpha 1 chain OS=Sus scrofa OX=9823 GN=COL18A1 PE=1 SV=2	134046	28	28	13	0	0	49	0	0	38	0	0	1	0	0
A0A287BQN5|A0A287BQN5_PIG	Collagen type XVIII alpha 1 chain OS=Sus scrofa OX=9823 GN=COL18A1 PE=1 SV=1	158086	28	28	13	0	0	49	0	0	38	0	0	1	0	0
F1RID8|F1RID8_PIG	Cilia and flagella associated protein 161 OS=Sus scrofa OX=9823 GN=CFAP161 PE=4 SV=2	37453	29	29	36	30	15	44	34	33	27	38	43	0	1	5
A0A287BMT0|A0A287BMT0_PIG	Uncharacterized protein OS=Sus scrofa OX=9823 GN=LOC100154312 PE=4 SV=1	56803	23	1	50	0	0	18	0	0	8	0	0	1	0	0
Q0R678|Q0R678_PIG	DJ-1 protein OS=Sus scrofa OX=9823 GN=PARK7 PE=1 SV=1	19936	33	33	3	11	63	0	1	2	0	1	0	33	38	26
I3L9J4|I3L9J4_PIG	Uncharacterized protein OS=Sus scrofa OX=9823 GN=CCT6A PE=1 SV=2	57970	27	12	13	29	27	24	18	3	15	14	3	4	6	3
F1RGZ7|F1RGZ7_PIG	Outer dense fiber of sperm tails 3 OS=Sus scrofa OX=9823 GN=ODF3 PE=4 SV=3	27545	39	39	12	6	37	37	28	5	58	39	2	3	2	1
H9N9G8|H9N9G8_PIG	Lactate dehydrogenase C isoform 3 OS=Sus scrofa OX=9823 GN=LDHC PE=2 SV=1	10486	20	7	8	3	0	53	23	0	58	32	0	3	7	0
F1RKZ5|F1RKZ5_PIG	Uncharacterized protein OS=Sus scrofa OX=9823 GN=LOC100154312 PE=4 SV=2	58264	23	1	44	20	10	13	13	7	7	8	1	1	0	0
A0A0B8RZH9|A0A0B8RZH9_PIG	Huntingtin interacting protein 1 OS=Sus scrofa domesticus OX=9825 GN=HIP1 PE=4 SV=1	113499	39	39	37	34	38	12	33	6	3	19	6	0	1	3
F1SAN2|F1SAN2_PIG	Coiled-coil domain containing 105 OS=Sus scrofa OX=9823 GN=CCDC105 PE=4 SV=2	57067	43	43	4	12	33	35	22	6	48	45	35	4	0	0
A0A0A8IK66|A0A0A8IK66_PIG	Heparin-binding protein WGA16 OS=Sus scrofa OX=9823 GN=wga16 PE=1 SV=1	18211	27	27	9	8	12	32	30	17	40	74	7	16	35	0
sp|P00761|TRYP_PIG	Trypsin OS=Sus scrofa OX=9823 PE=1 SV=1	24409	29	29	40	16	34	31	39	68	48	32	119	366	303	919
A0A287B5W2|A0A287B5W2_PIG	Uncharacterized protein OS=Sus scrofa OX=9823 GN=LOC100302368 PE=3 SV=1	25895	29	29	40	0	34	31	0	68	48	0	119	366	0	919
C5IWV5|C5IWV5_PIG	Trypsinogen OS=Sus scrofa OX=9823 PE=2 SV=1	25881	29	29	40	0	34	31	0	68	48	0	119	366	0	919
F1RPH0|F1RPH0_PIG	Phosphoglycerate kinase OS=Sus scrofa OX=9823 GN=PGK1 PE=1 SV=3	44575	31	11	34	19	34	35	14	5	26	5	3	12	10	3
A0A287BLC7|A0A287BLC7_PIG	Acyl-CoA synthetase long chain family member 6 OS=Sus scrofa OX=9823 GN=ACSL6 PE=1 SV=1	80707	41	38	32	58	19	16	24	9	4	18	3	0	4	0
A0A287AFA5|A0A287AFA5_PIG	Uncharacterized protein OS=Sus scrofa OX=9823 PE=1 SV=1	37423	34	2	3	0	0	3	0	0	2	0	0	70	0	0
F1SHH9|F1SHH9_PIG	1-aminocyclopropane-1-carboxylate synthase homolog (inactive) like OS=Sus scrofa OX=9823 GN=ACCSL PE=4 SV=3	64625	38	38	0	0	0	0	0	0	2	6	0	74	101	3
F1SL49|F1SL49_PIG	Tripartite motif containing 42 OS=Sus scrofa OX=9823 GN=TRIM42 PE=4 SV=2	77478	30	30	37	37	2	31	50	11	28	33	11	0	0	0
A0A287AHH1|A0A287AHH1_PIG	NME/NM23 family member 7 OS=Sus scrofa OX=9823 GN=NME7 PE=3 SV=1	42481	35	35	50	0	24	44	0	45	23	0	63	3	0	5
A0A287AN02|A0A287AN02_PIG	26S proteasome non-ATPase regulatory subunit 2 OS=Sus scrofa OX=9823 GN=PSMD2 PE=1 SV=1	100242	40	40	25	38	25	12	34	5	7	24	2	2	9	0
F1S764|F1S764_PIG	Uncharacterized protein OS=Sus scrofa OX=9823 GN=CPT2 PE=1 SV=1	73967	39	39	0	0	11	0	0	0	2	0	0	67	0	1
D5LIE7|D5LIE7_PIG	Mitochondrial carnitine palmitoyltransferase II OS=Sus scrofa OX=9823 PE=2 SV=1	73877	39	39	0	3	11	0	1	0	2	4	0	67	57	1
F1RRH7|F1RRH7_PIG	Radial spoke head 9 homolog OS=Sus scrofa OX=9823 GN=RSPH9 PE=4 SV=1	31260	37	37	5	0	43	35	16	18	21	34	0	2	1	2
A6M928|A6M928_PIG	Eukaryotic translation initiation factor 4A isoform 1 OS=Sus scrofa OX=9823 GN=EIF4A1 PE=1 SV=1	46154	33	24	22	40	18	26	21	19	26	25	14	6	7	1
I3LLD5|I3LLD5_PIG	Eukaryotic translation initiation factor 4A1 OS=Sus scrofa OX=9823 GN=EIF4A1 PE=1 SV=2	44492	33	24	22	0	18	26	0	19	26	0	14	6	0	1
A0A286ZQY6|A0A286ZQY6_PIG	Isocitrate dehydrogenase [NAD] subunit mitochondrial OS=Sus scrofa OX=9823 GN=IDH3A PE=1 SV=1	39651	34	34	19	19	44	2	10	2	1	8	0	25	14	11
F1RR24|F1RR24_PIG	Uncharacterized protein OS=Sus scrofa OX=9823 PE=4 SV=3	38263	53	53	35	34	56	2	8	4	4	0	1	0	0	0
Q6IMG8|Q6IMG8_PIG	Tepp OS=Sus scrofa OX=9823 GN=Tepp PE=2 SV=1	24840	39	6	36	44	20	57	48	16	27	30	21	1	0	1
F2Z5N0|F2Z5N0_PIG	Proteasome subunit alpha type OS=Sus scrofa OX=9823 GN=PSMA6 PE=1 SV=1	27399	23	23	17	24	15	11	13	22	21	25	11	6	6	0
I3LNF2|I3LNF2_PIG	Dynein axonemal heavy chain 1 OS=Sus scrofa OX=9823 GN=DNAH1 PE=4 SV=2	497682	62	61	11	9	2	2	36	1	7	45	0	0	0	0
sp|P00506|AATM_PIG	Aspartate aminotransferase mitochondrial OS=Sus scrofa OX=9823 GN=GOT2 PE=1 SV=2	47436	42	42	6	0	0	0	0	0	0	0	0	19	0	0
F1RPZ6|F1RPZ6_PIG	Cysteine-rich secretory protein 2 OS=Sus scrofa OX=9823 GN=CRISP2 PE=2 SV=2	27053	30	25	47	13	55	33	13	32	35	9	19	3	1	5
A0A287AGG3|A0A287AGG3_PIG	Proteasome subunit beta OS=Sus scrofa OX=9823 GN=PSMB5 PE=1 SV=1	30160	26	26	30	25	17	25	26	18	26	26	22	7	10	2
A0A287A4T2|A0A287A4T2_PIG	Electron transfer flavoprotein subunit alpha OS=Sus scrofa OX=9823 GN=ETFA PE=1 SV=1	35052	31	31	12	0	27	1	0	0	2	0	0	24	0	11
Q6UAQ9|Q6UAQ9_PIG	Electron transfer flavoprotein alpha subunit (Fragment) OS=Sus scrofa OX=9823 GN=ETFA PE=2 SV=1	32884	31	31	12	29	27	1	7	0	2	0	0	24	9	11
F1SFH7|F1SFH7_PIG	LIM domain containing preferred translocation partner in lipoma OS=Sus scrofa OX=9823 GN=LPP PE=1 SV=3	65650	39	39	60	33	8	20	31	8	18	11	4	0	0	0
G9F6X8|G9F6X8_PIG	Protein disulfide-isomerase OS=Sus scrofa OX=9823 GN=P4HB PE=2 SV=1	56399	33	33	1	2	2	3	1	0	2	0	0	57	60	23
F1RFS5|F1RFS5_PIG	Uncharacterized protein OS=Sus scrofa OX=9823 GN=TEPP PE=4 SV=2	24842	36	3	37	0	0	58	0	0	22	0	0	1	0	0
sp|P0CG68|UBC_PIG	Polyubiquitin-C OS=Sus scrofa OX=9823 GN=UBC PE=2 SV=1	59993	27	27	7	0	17	29	0	10	72	0	10	76	0	32
A0A0B8RT13|A0A0B8RT13_PIG	Ubiquitin C OS=Sus scrofa domesticus OX=9825 GN=UBC PE=4 SV=1	59993	27	27	7	0	17	29	0	10	72	0	10	76	0	32
A0A2C9F3G2|A0A2C9F3G2_PIG	Polyubiquitin-C OS=Sus scrofa OX=9823 GN=UBC PE=4 SV=1	102727	27	27	7	0	17	29	0	10	72	0	10	76	0	32
F1RKR0|F1RKR0_PIG	Protein phosphatase 1 regulatory subunit 32 OS=Sus scrofa OX=9823 GN=PPP1R32 PE=4 SV=2	47269	25	25	20	16	13	40	17	27	36	24	30	1	0	0
A0A287BFZ1|A0A287BFZ1_PIG	Chromosome 1 open reading frame 194 OS=Sus scrofa OX=9823 GN=C1orf194 PE=4 SV=1	19276	28	28	1	1	31	23	12	51	25	32	16	0	0	0
F1ST43|F1ST43_PIG	Acyl-CoA dehydrogenase very long chain OS=Sus scrofa OX=9823 GN=ACADVL PE=1 SV=3	70327	34	34	8	7	17	1	11	0	1	9	0	8	18	2
A0A0B8RTA8|A0A0B8RTA8_PIG	Acyl-CoA dehydrogenase very long chain OS=Sus scrofa domesticus OX=9825 GN=ACADVL PE=3 SV=1	70327	34	34	8	0	17	1	0	0	1	0	0	8	0	2
A0A287AGL6|A0A287AGL6_PIG	Radial spoke head 6 homolog A OS=Sus scrofa OX=9823 GN=RSPH6A PE=4 SV=1	82092	24	24	16	5	48	28	28	16	22	30	2	2	16	4
F1S0Q1|F1S0Q1_PIG	Heat shock protein family B (small) member 9 OS=Sus scrofa OX=9823 GN=HSPB9 PE=3 SV=2	16987	24	24	74	25	23	46	31	24	38	18	23	4	7	3
F1RJW3|F1RJW3_PIG	Cilia and flagella associated protein 45 OS=Sus scrofa OX=9823 GN=CFAP45 PE=4 SV=2	66484	38	38	3	1	48	31	6	43	55	20	26	0	0	0
M3VH37|M3VH37_PIG	ITPRIP like 1 OS=Sus scrofa OX=9823 GN=ITPRIPL1 PE=2 SV=1	62611	25	25	40	35	0	26	43	14	19	25	10	0	0	0
A0A286ZLS7|A0A286ZLS7_PIG	ITPRIP like 1 OS=Sus scrofa OX=9823 GN=ITPRIPL1 PE=4 SV=1	69490	25	25	40	0	0	26	0	14	19	0	10	0	0	0
sp|P28491|CALR_PIG	Calreticulin OS=Sus scrofa OX=9823 GN=CALR PE=1 SV=3	48288	28	28	2	0	4	1	0	2	2	0	2	58	0	52
A0A287B0P6|A0A287B0P6_PIG	Calreticulin OS=Sus scrofa OX=9823 GN=CALR PE=1 SV=1	42610	28	28	2	6	0	1	6	0	2	4	0	58	74	0
A0A286ZVY3|A0A286ZVY3_PIG	Uncharacterized protein OS=Sus scrofa OX=9823 GN=PSP-I PE=4 SV=1	12542	31	1	14	0	0	34	0	0	38	0	0	13	0	0
F1RSL4|F1RSL4_PIG	Maestro heat like repeat family member 1 OS=Sus scrofa OX=9823 GN=MROH1 PE=4 SV=2	176621	42	42	17	27	18	11	12	6	2	16	3	0	1	0
A0A287BD47|A0A287BD47_PIG	Maestro heat like repeat family member 1 OS=Sus scrofa OX=9823 GN=MROH1 PE=4 SV=1	180292	42	42	17	0	18	11	0	6	2	0	3	0	0	0
I3LAZ9|I3LAZ9_PIG	Maestro heat like repeat family member 1 OS=Sus scrofa OX=9823 GN=MROH1 PE=4 SV=2	181260	42	42	17	0	18	11	0	6	2	0	3	0	0	0
F1RT97|F1RT97_PIG	Spermatogenesis-associated protein 20 OS=Sus scrofa OX=9823 GN=SPATA20 PE=1 SV=1	88538	28	28	37	39	21	39	32	28	28	18	20	1	1	1
sp|P00348|HCDH_PIG	Hydroxyacyl-coenzyme A dehydrogenase mitochondrial OS=Sus scrofa OX=9823 GN=HADH PE=1 SV=2	34161	34	34	4	8	21	1	1	0	2	0	0	40	25	10
I3LIC2|I3LIC2_PIG	Leucine rich pentatricopeptide repeat containing OS=Sus scrofa OX=9823 GN=LRPPRC PE=1 SV=2	155981	36	36	0	0	0	0	0	0	0	0	0	48	0	2
F1S5J1|F1S5J1_PIG	Leucine rich pentatricopeptide repeat containing OS=Sus scrofa OX=9823 GN=LRPPRC PE=1 SV=2	158770	36	36	0	0	0	0	0	0	0	0	0	48	43	2
F1SIL5|F1SIL5_PIG	Vacuolar protein sorting 13 homolog A OS=Sus scrofa OX=9823 GN=VPS13A PE=1 SV=3	291884	43	43	23	86	10	14	21	13	4	3	3	0	0	0
F1RZ80|F1RZ80_PIG	Coiled-coil domain containing 40 OS=Sus scrofa OX=9823 GN=CCDC40 PE=4 SV=3	110615	35	35	9	6	25	18	10	6	25	22	0	0	0	0
I3LTK6|I3LTK6_PIG	Uncharacterized protein OS=Sus scrofa OX=9823 GN=OAZ3 PE=4 SV=2	27303	26	26	90	35	111	129	40	75	225	119	81	15	9	15
F1SQZ0|F1SQZ0_PIG	Phosphoinositide phospholipase C OS=Sus scrofa OX=9823 GN=PLCZ1 PE=4 SV=1	73754	25	25	14	33	19	12	22	4	12	23	5	1	5	4
I3LCA2|I3LCA2_PIG	Chaperonin containing TCP1 subunit 8 OS=Sus scrofa OX=9823 GN=CCT8 PE=1 SV=2	59976	41	41	7	20	38	4	9	2	10	11	0	21	11	0
A0A2C9F357|A0A2C9F357_PIG	Uncharacterized protein OS=Sus scrofa OX=9823 GN=BSP1 PE=4 SV=1	17851	25	25	65	41	42	59	44	19	51	46	6	6	38	4
sp|P80964|PB1_PIG	Seminal plasma protein pB1 OS=Sus scrofa OX=9823 PE=1 SV=2	15373	25	25	65	0	42	59	0	19	51	0	6	6	0	4
A0A0B8RW53|A0A0B8RW53_PIG	ATP-citrate synthase OS=Sus scrofa domesticus OX=9825 GN=ACLY PE=3 SV=1	120884	33	33	8	18	39	2	16	0	5	8	0	1	7	0
F1S0N2|F1S0N2_PIG	ATP-citrate synthase OS=Sus scrofa OX=9823 GN=ACLY PE=1 SV=3	123708	33	33	8	0	39	2	0	0	5	0	0	1	0	0
F1SMZ6|F1SMZ6_PIG	Uncharacterized protein OS=Sus scrofa OX=9823 GN=HSPE1 PE=1 SV=1	10960	28	2	2	0	17	0	0	0	0	0	1	88	84	38
F1RPP5|F1RPP5_PIG	Methyl-CpG binding domain protein 1 OS=Sus scrofa OX=9823 GN=MBD1 PE=4 SV=3	62072	34	34	18	28	19	33	33	27	30	40	48	0	1	0
F2Z558|F2Z558_PIG	Tyrosine 3-monooxygenase/tryptophan 5-monooxygenase activation protein zeta OS=Sus scrofa OX=9823 GN=YWHAZ PE=1 SV=3	27745	36	27	13	16	56	12	11	8	3	7	2	27	38	18
A0A287AXR5|A0A287AXR5_PIG	Tyrosine 3-monooxygenase/tryptophan 5-monooxygenase activation protein zeta OS=Sus scrofa OX=9823 GN=YWHAZ PE=1 SV=1	26683	36	27	13	0	56	12	0	8	3	0	2	27	0	18
Q8WNR3|Q8WNR3_PIG	Arylsulfatase A OS=Sus scrofa OX=9823 GN=AS-A PE=2 SV=2	53603	32	32	36	4	70	2	1	0	1	1	0	2	9	25
I3LPP1|I3LPP1_PIG	Fumarate hydratase mitochondrial OS=Sus scrofa OX=9823 GN=FH PE=1 SV=2	49970	30	30	7	0	12	0	0	0	0	0	0	29	0	3
A0A287AR55|A0A287AR55_PIG	Fumarate hydratase mitochondrial OS=Sus scrofa OX=9823 GN=FH PE=1 SV=1	54749	30	30	7	1	12	0	0	0	0	0	0	29	10	3
Q6WSP6|Q6WSP6_PIG	Chaperonin 10 OS=Sus scrofa OX=9823 PE=2 SV=1	10932	28	2	2	0	18	0	0	0	0	0	1	83	0	35
A0A0B8RZA3|A0A0B8RZA3_PIG	Prohibitin OS=Sus scrofa domesticus OX=9825 GN=PHB PE=4 SV=1	29804	29	29	0	0	34	5	2	16	13	3	14	9	16	2
F2Z543|F2Z543_PIG	Prohibitin OS=Sus scrofa OX=9823 GN=PHB PE=1 SV=3	29804	29	29	0	0	34	5	0	16	13	0	14	9	0	2
F1S418|F1S418_PIG	Uncharacterized protein OS=Sus scrofa OX=9823 GN=PRDX3 PE=1 SV=1	28471	25	25	0	0	0	0	0	0	2	2	3	123	41	6
F1SSP4|F1SSP4_PIG	Chaperonin containing TCP1 subunit 8 like 2 OS=Sus scrofa OX=9823 GN=CCT8L2 PE=3 SV=3	57807	24	24	9	5	8	28	14	4	21	21	2	0	0	0
F1SBB1|F1SBB1_PIG	Uncharacterized protein OS=Sus scrofa OX=9823 GN=CABYR PE=1 SV=2	46771	37	6	19	7	50	14	10	7	12	3	3	3	2	5
K4IWU4|K4IWU4_PIG	Profilin OS=Sus scrofa OX=9823 PE=2 SV=1	14726	29	29	16	15	36	16	7	16	10	11	11	1	3	2
F1SP87|F1SP87_PIG	Uncharacterized protein OS=Sus scrofa OX=9823 PE=1 SV=3	15379	25	25	34	11	32	40	12	71	47	2	5	1	2	1
A0A287AGN3|A0A287AGN3_PIG	Heat shock protein family A (Hsp70) member 4 like OS=Sus scrofa OX=9823 GN=HSPA4L PE=1 SV=1	108590	36	33	30	40	8	8	26	4	8	13	0	5	3	0
D3K5J4|D3K5J4_PIG	LY6/PLAUR domain containing 4 OS=Sus scrofa OX=9823 GN=LYPD4 PE=1 SV=1	26631	25	25	23	8	19	18	11	3	14	13	0	2	7	4
F1SMW9|F1SMW9_PIG	26S proteasome non-ATPase regulatory subunit 1 OS=Sus scrofa OX=9823 GN=PSMD1 PE=1 SV=3	105814	26	26	22	17	16	7	20	0	3	10	0	1	7	1
A0A0B8RTB9|A0A0B8RTB9_PIG	26S proteasome non-ATPase regulatory subunit 1 OS=Sus scrofa domesticus OX=9825 GN=PSMD1 PE=3 SV=1	105814	26	26	22	0	16	7	0	0	3	0	0	1	0	1
F1RUK8|F1RUK8_PIG	Rab GDP dissociation inhibitor OS=Sus scrofa OX=9823 GN=GDI2 PE=1 SV=1	50327	33	29	5	7	47	1	2	1	1	3	0	24	20	3
D0G6X7|D0G6X7_PIG	Dihydroxyacetone phosphate acyltransferase OS=Sus scrofa OX=9823 GN=GNPAT PE=2 SV=1	77268	28	3	22	42	0	21	20	0	18	20	0	1	1	0
F1RVN1|F1RVN1_PIG	NADH dehydrogenase [ubiquinone] flavoprotein 1 mitochondrial OS=Sus scrofa OX=9823 GN=NDUFV1 PE=1 SV=1	50570	27	27	11	0	47	25	18	38	11	6	11	3	6	3
A0A287A5Y7|A0A287A5Y7_PIG	Dynein axonemal heavy chain 3 OS=Sus scrofa OX=9823 GN=DNAH3 PE=4 SV=1	462801	44	42	10	31	2	3	42	5	1	10	0	0	1	0
D0G782|D0G782_PIG	NAD(P) dependent steroid dehydrogenase-like OS=Sus scrofa OX=9823 GN=NSDHL PE=2 SV=1	40501	23	23	15	0	0	13	0	0	10	0	0	9	0	0
F1S2D0|F1S2D0_PIG	NAD(P) dependent steroid dehydrogenase-like OS=Sus scrofa OX=9823 GN=NSDHL PE=1 SV=1	40502	23	23	15	30	0	13	22	0	10	14	0	9	4	0
F1S8I7|F1S8I7_PIG	IZUMO family member 4 OS=Sus scrofa OX=9823 GN=IZUMO4 PE=4 SV=3	23770	29	29	17	3	72	4	0	5	6	1	3	1	14	31
F1SGG9|F1SGG9_PIG	Uncharacterized protein OS=Sus scrofa OX=9823 PE=1 SV=3	35349	35	4	8	35	0	5	43	0	17	13	0	144	70	0
F2Z5K2|F2Z5K2_PIG	Proteasome subunit alpha type OS=Sus scrofa OX=9823 GN=PSMA5 PE=1 SV=1	26411	25	25	33	30	7	20	19	15	23	29	9	7	8	0
A0A287BNS1|A0A287BNS1_PIG	Chromosome 10 open reading frame 82 OS=Sus scrofa OX=9823 GN=C10orf82 PE=4 SV=1	28702	37	37	44	32	28	48	25	40	35	25	45	1	0	0
I3LLI7|I3LLI7_PIG	Dynein axonemal intermediate chain 2 OS=Sus scrofa OX=9823 GN=DNAI2 PE=4 SV=2	69308	36	36	11	6	42	16	15	5	8	8	0	0	0	4
I3LNB4|I3LNB4_PIG	Uncharacterized protein OS=Sus scrofa OX=9823 GN=ALDH4A1 PE=1 SV=2	61799	23	23	9	5	14	0	4	0	1	2	0	28	33	8
F1RJ25|F1RJ25_PIG	Fructose-bisphosphate aldolase OS=Sus scrofa OX=9823 GN=ALDOC PE=1 SV=2	39377	22	15	9	2	9	21	3	8	16	0	0	23	33	1
A0A287B8Z2|A0A287B8Z2_PIG	Fructose-bisphosphate aldolase OS=Sus scrofa OX=9823 GN=ALDOC PE=1 SV=1	46847	22	15	9	0	9	21	0	8	16	0	0	23	0	1
Q8WNW8|Q8WNW8_PIG	Nexin-1 OS=Sus scrofa OX=9823 GN=PN-1 PE=2 SV=2	44084	27	26	6	0	0	28	1	0	27	2	0	5	0	0
F1RKZ6|F1RKZ6_PIG	Ubiquitin specific peptidase 7 OS=Sus scrofa OX=9823 GN=USP7 PE=1 SV=2	128502	40	40	27	36	33	6	22	4	2	19	0	4	12	0
I3LDJ2|I3LDJ2_PIG	Uncharacterized protein OS=Sus scrofa OX=9823 GN=SPATA19 PE=4 SV=1	17970	28	28	27	69	34	21	11	32	18	5	2	1	5	3
D9U8D1|D9U8D1_PIG	Dynein light chain OS=Sus scrofa OX=9823 GN=LC8 PE=1 SV=1	10366	23	8	36	36	66	32	18	31	30	22	10	19	33	13
F1S0S5|F1S0S5_PIG	Sperm acrosome associated 9 OS=Sus scrofa OX=9823 GN=SPACA9 PE=1 SV=2	25291	26	26	10	27	173	27	26	164	45	30	25	1	10	33
F1S0U2|F1S0U2_PIG	Cilia and flagella associated protein 77 OS=Sus scrofa OX=9823 GN=CFAP77 PE=4 SV=3	31623	30	30	5	5	17	37	8	17	31	22	18	1	0	0
F2Z5L7|F2Z5L7_PIG	Proteasome subunit alpha type OS=Sus scrofa OX=9823 GN=PSMA1 PE=1 SV=1	29556	25	25	21	15	13	19	7	16	20	25	9	8	10	0
F1STS5|F1STS5_PIG	Coiled-coil domain containing 81 OS=Sus scrofa OX=9823 GN=CCDC81 PE=4 SV=3	70053	31	12	1	14	14	22	7	25	30	24	14	0	0	1
A0A287BA78|A0A287BA78_PIG	Uncharacterized protein OS=Sus scrofa OX=9823 GN=CYB5B PE=1 SV=1	16199	21	21	15	9	13	19	7	18	21	17	24	3	8	3
F1RI22|F1RI22_PIG	Uncharacterized protein OS=Sus scrofa OX=9823 GN=PSP-I PE=4 SV=3	14719	26	2	23	10	0	47	17	0	31	24	0	11	63	0
A0A287B7T2|A0A287B7T2_PIG	Dihydroxyacetone phosphate acyltransferase OS=Sus scrofa OX=9823 GN=GNPAT PE=3 SV=1	77266	26	1	21	41	10	20	19	27	18	16	13	1	1	0
sp|P41367|ACADM_PIG	Medium-chain specific acyl-CoA dehydrogenase mitochondrial OS=Sus scrofa OX=9823 GN=ACADM PE=1 SV=3	46485	33	33	1	2	31	1	6	0	2	4	0	45	42	7
F1RUI2|F1RUI2_PIG	RIB43A domain with coiled-coils 1 OS=Sus scrofa OX=9823 GN=RIBC1 PE=4 SV=1	44528	19	19	2	4	10	21	6	20	40	16	40	0	0	1
F1S598|F1S598_PIG	Coiled-coil domain containing 151 OS=Sus scrofa OX=9823 GN=CCDC151 PE=4 SV=3	71995	29	29	6	2	42	1	8	5	6	7	0	0	0	0
F1S227|F1S227_PIG	Peptidyl-tRNA hydrolase 2 OS=Sus scrofa OX=9823 GN=PTRH2 PE=1 SV=1	19274	24	24	9	16	26	33	10	26	30	12	1	0	0	0
A0A0B8S099|A0A0B8S099_PIG	Citrate synthase OS=Sus scrofa domesticus OX=9825 GN=CS PE=3 SV=1	51630	34	34	1	6	38	0	1	0	0	2	1	25	28	5
sp|P00889|CISY_PIG	Citrate synthase mitochondrial OS=Sus scrofa OX=9823 GN=CS PE=1 SV=2	51630	34	34	1	0	38	0	0	0	0	0	1	25	0	5
C8C420|C8C420_PIG	Solute carrier family 25 member 3 OS=Sus scrofa OX=9823 GN=SLC25A3 PE=2 SV=1	39990	28	28	6	17	16	1	0	0	1	1	0	4	33	0
F1S1V4|F1S1V4_PIG	Coiled-coil domain containing 173 OS=Sus scrofa OX=9823 GN=CCDC173 PE=4 SV=2	66150	29	29	2	0	19	18	7	1	21	16	4	0	0	0
F1RSL2|F1RSL2_PIG	Spermatogenesis and centriole associated 1 OS=Sus scrofa OX=9823 GN=SPATC1 PE=1 SV=3	46263	25	20	14	23	56	4	9	6	7	3	3	0	1	0
F1S0K2|F1S0K2_PIG	Keratin 15 OS=Sus scrofa OX=9823 GN=KRT15 PE=1 SV=2	47368	30	1	4	22	0	4	39	0	24	14	0	116	31	0
A0A286ZYN0|A0A286ZYN0_PIG	Keratin 15 OS=Sus scrofa OX=9823 GN=KRT15 PE=1 SV=1	46767	30	1	4	0	0	4	0	0	24	0	0	116	0	0
I3LLY8|I3LLY8_PIG	Keratin 79 OS=Sus scrofa OX=9823 GN=KRT79 PE=1 SV=1	57902	32	1	8	0	0	5	0	0	18	0	0	136	0	0
A0A287A2X0|A0A287A2X0_PIG	Keratin 79 OS=Sus scrofa OX=9823 GN=KRT79 PE=1 SV=1	58669	32	1	8	0	0	5	0	0	18	0	0	136	0	0
F1RUH0|F1RUH0_PIG	HECT UBA and WWE domain containing 1 E3 ubiquitin protein ligase OS=Sus scrofa OX=9823 GN=HUWE1 PE=1 SV=2	486178	23	23	10	0	4	1	0	0	2	0	0	2	0	0
I3L770|I3L770_PIG	HECT UBA and WWE domain containing 1 E3 ubiquitin protein ligase OS=Sus scrofa OX=9823 GN=HUWE1 PE=1 SV=2	482602	23	23	10	27	4	1	17	0	2	0	0	2	6	0
A0A286ZQ50|A0A286ZQ50_PIG	Nucleoporin 155 OS=Sus scrofa OX=9823 GN=NUP155 PE=1 SV=1	154398	30	30	19	0	6	8	0	4	2	0	3	1	0	0
A0A286ZN52|A0A286ZN52_PIG	Proteasome subunit beta OS=Sus scrofa OX=9823 GN=PSMB3 PE=1 SV=1	23008	18	18	22	18	12	16	20	20	23	18	17	6	10	1
F1S0J8|F1S0J8_PIG	Keratin 14 OS=Sus scrofa OX=9823 GN=KRT14 PE=1 SV=1	44213	28	6	14	12	0	12	15	0	8	6	0	93	22	0
sp|P11607|AT2A2_PIG	Sarcoplasmic/endoplasmic reticulum calcium ATPase 2 OS=Sus scrofa OX=9823 GN=ATP2A2 PE=1 SV=1	114792	32	32	31	32	0	9	38	11	12	13	5	0	0	0
F1S0P7|F1S0P7_PIG	Tetratricopeptide repeat domain 25 OS=Sus scrofa OX=9823 GN=TTC25 PE=4 SV=3	78584	29	29	9	7	54	2	3	0	4	4	0	0	0	4
A5GFW9|A5GFW9_PIG	Orthologue of H. sapiens chromosome 20 open reading frame 106 (C20orf106) OS=Sus scrofa OX=9823 GN=C17H20orf106 PE=4 SV=1	19441	21	21	35	38	3	10	14	18	12	8	5	2	2	0
A0A287A690|A0A287A690_PIG	Peroxiredoxin-2 OS=Sus scrofa OX=9823 GN=PRDX2 PE=1 SV=1	25937	24	5	0	0	1	0	0	0	7	0	1	103	0	25
A0A287AJ76|A0A287AJ76_PIG	Peroxiredoxin-2 OS=Sus scrofa OX=9823 GN=PRDX2 PE=1 SV=1	23360	24	5	0	0	1	0	0	0	7	0	1	103	0	25
A0A287BAZ6|A0A287BAZ6_PIG	Peroxiredoxin 2 OS=Sus scrofa OX=9823 GN=PRDX2 PE=1 SV=1	21880	24	5	0	1	1	0	0	0	7	1	1	103	45	25
I3LCA1|I3LCA1_PIG	ATP-dependent 6-phosphofructokinase OS=Sus scrofa OX=9823 GN=PFKM PE=1 SV=2	85315	23	21	13	12	16	3	14	0	3	9	2	2	7	0
A0A286ZIJ9|A0A286ZIJ9_PIG	ATP-dependent 6-phosphofructokinase OS=Sus scrofa OX=9823 GN=PFKM PE=1 SV=1	89068	23	21	13	0	16	3	0	0	3	0	2	2	0	0
A0A287A1E4|A0A287A1E4_PIG	ATP-dependent 6-phosphofructokinase OS=Sus scrofa OX=9823 GN=PFKM PE=1 SV=1	88986	23	21	13	0	16	3	0	0	3	0	2	2	0	0
A0A286ZQ47|A0A286ZQ47_PIG	ATP-dependent 6-phosphofructokinase OS=Sus scrofa OX=9823 GN=PFKM PE=1 SV=1	88547	23	21	13	0	16	3	0	0	3	0	2	2	0	0
A0A287A4Z2|A0A287A4Z2_PIG	Superoxide dismutase OS=Sus scrofa OX=9823 GN=SOD2 PE=1 SV=1	24710	26	26	2	0	26	0	0	0	0	0	0	27	21	5
A0A2C9F3F5|A0A2C9F3F5_PIG	Uncharacterized protein OS=Sus scrofa OX=9823 GN=LOC396905 PE=4 SV=1	18094	30	18	31	12	12	58	12	20	71	33	34	7	12	4
sp|P26461|IACS_PIG	Sperm-associated acrosin inhibitor OS=Sus scrofa OX=9823 PE=1 SV=2	11141	30	18	31	0	12	58	0	20	71	0	34	7	0	4
E2IUK7|E2IUK7_PIG	DNAJB13 OS=Sus scrofa OX=9823 GN=DNAJB13 PE=2 SV=1	36058	27	27	8	3	27	23	14	10	24	23	1	3	0	2
sp|P19620|ANXA2_PIG	Annexin A2 OS=Sus scrofa OX=9823 GN=ANXA2 PE=1 SV=4	38542	26	26	1	0	0	3	0	0	1	0	0	36	0	0
F1S073|F1S073_PIG	Annexin OS=Sus scrofa OX=9823 GN=ANXA2 PE=1 SV=2	38579	26	26	1	5	0	3	3	0	1	0	0	36	56	0
A0A286ZJV6|A0A286ZJV6_PIG	Annexin OS=Sus scrofa OX=9823 GN=ANXA2 PE=1 SV=1	46949	26	26	1	0	0	3	0	0	1	0	0	36	0	0
A0A287BJ16|A0A287BJ16_PIG	Uncharacterized protein OS=Sus scrofa OX=9823 GN=LOC110255463 PE=1 SV=1	45713	27	27	12	6	16	0	2	0	0	5	0	30	22	5
F1RQT8|F1RQT8_PIG	T-complex-associated-testis-expressed 1 OS=Sus scrofa OX=9823 GN=TCTE1 PE=4 SV=1	55322	21	5	1	1	16	27	10	7	24	12	2	0	0	0
Q28956|Q28956_PIG	17beta-estradiol dehydrogenase OS=Sus scrofa OX=9823 PE=2 SV=1	80102	29	29	4	9	0	3	8	0	3	2	0	40	33	0
A0A286ZYC3|A0A286ZYC3_PIG	Beta-hexosaminidase OS=Sus scrofa OX=9823 GN=HEXB PE=1 SV=1	59710	25	25	8	17	8	19	11	2	10	13	0	2	18	0
D0G6X8|D0G6X8_PIG	Beta-hexosaminidase OS=Sus scrofa OX=9823 GN=HEXB PE=1 SV=1	62110	25	25	8	0	8	19	0	2	10	0	0	2	0	0
G3CKJ2|G3CKJ2_PIG	Glyceraldehyde-3-phosphate dehydrogenase (Fragment) OS=Sus scrofa OX=9823 GN=GAPDH PE=2 SV=1	29469	32	11	8	2	11	4	1	7	6	2	2	39	27	4
F1SDW6|F1SDW6_PIG	Oxoglutarate dehydrogenase like OS=Sus scrofa OX=9823 GN=OGDHL PE=1 SV=3	111354	33	20	3	1	6	1	1	1	0	0	0	40	40	3
A0A286ZWR6|A0A286ZWR6_PIG	Oxoglutarate dehydrogenase like OS=Sus scrofa OX=9823 GN=OGDHL PE=1 SV=1	109992	33	20	3	0	0	1	0	0	0	0	0	40	0	0
A0A287BDE3|A0A287BDE3_PIG	Hormone-sensitive lipase OS=Sus scrofa OX=9823 GN=LIPE PE=4 SV=1	83450	24	24	16	0	28	7	0	4	3	0	1	0	0	0
B9ZUV0|B9ZUV0_PIG	Cytochrome c oxidase subunit 2 OS=Sus scrofa domesticus OX=9825 GN=COII PE=3 SV=1	26442	24	5	9	5	15	43	10	14	18	10	11	7	8	1
Q9G1G3|Q9G1G3_PIG	Cytochrome c oxidase subunit 2 OS=Sus scrofa OX=9823 GN=COII PE=3 SV=1	26442	24	5	9	0	15	43	0	14	18	0	11	7	0	1
K7GP28|K7GP28_PIG	Hydroxysteroid 17-beta dehydrogenase 10 OS=Sus scrofa OX=9823 GN=HSD17B10 PE=1 SV=1	30788	27	27	21	11	21	1	12	1	0	9	1	21	10	7
I3LER5|I3LER5_PIG	Cytochrome c oxidase subunit 4 isoform 1 mitochondrial OS=Sus scrofa OX=9823 GN=COX4I1 PE=1 SV=2	19641	20	20	2	0	22	14	5	25	29	20	22	6	8	1
I3LHM6|I3LHM6_PIG	Epididymis-specific alpha-mannosidase OS=Sus scrofa OX=9823 GN=MAN2B2 PE=4 SV=2	115185	33	3	9	19	7	11	27	2	9	19	1	0	5	0
A0A287AXS7|A0A287AXS7_PIG	ADP/ATP translocase 3 OS=Sus scrofa OX=9823 GN=SLC25A6 PE=3 SV=1	32920	35	16	5	1	20	0	0	1	0	5	0	17	36	2
A0A287AVQ0|A0A287AVQ0_PIG	ADP/ATP translocase 3 OS=Sus scrofa OX=9823 GN=SLC25A6 PE=3 SV=1	38521	35	16	5	0	0	0	0	0	0	0	0	17	0	0
F1SEN2|F1SEN2_PIG	Glutamate dehydrogenase 1 mitochondrial OS=Sus scrofa OX=9823 GN=GLUD1 PE=1 SV=1	61308	29	27	1	0	6	0	1	0	0	0	0	26	44	0
A0A287AR48|A0A287AR48_PIG	Succinate--CoA ligase [ADP-forming] subunit beta mitochondrial OS=Sus scrofa OX=9823 GN=SUCLA2 PE=1 SV=1	50304	30	29	12	0	34	0	0	0	0	0	0	3	0	3
I3LTX2|I3LTX2_PIG	Uncharacterized protein OS=Sus scrofa OX=9823 GN=CEP70 PE=4 SV=2	72013	26	26	31	26	22	1	6	0	3	9	2	0	2	0
I3LK18|I3LK18_PIG	Polycystin 2 like 2 transient receptor potential cation channel OS=Sus scrofa OX=9823 GN=PKD2L2 PE=4 SV=2	71584	27	27	19	3	32	1	8	2	6	14	1	1	10	2
A0A287AH93|A0A287AH93_PIG	Extended synaptotagmin 1 OS=Sus scrofa OX=9823 GN=ESYT1 PE=1 SV=1	115172	25	25	0	0	0	0	0	0	1	0	0	44	0	10
F1SPG9|F1SPG9_PIG	Extended synaptotagmin 1 OS=Sus scrofa OX=9823 GN=ESYT1 PE=1 SV=2	117291	25	25	0	0	0	0	0	0	1	2	0	44	71	10
A0A287ASV9|A0A287ASV9_PIG	Extended synaptotagmin 1 OS=Sus scrofa OX=9823 GN=ESYT1 PE=1 SV=1	119322	25	25	0	0	0	0	0	0	1	0	0	44	0	10
sp|Q28949|MA2B2_PIG	Epididymis-specific alpha-mannosidase OS=Sus scrofa OX=9823 GN=MAN2B2 PE=1 SV=2	114230	32	2	9	0	5	11	0	1	9	0	1	0	0	0
F1RWZ8|F1RWZ8_PIG	Uncharacterized protein OS=Sus scrofa OX=9823 GN=DUSP21 PE=3 SV=2	21119	18	16	18	13	15	25	12	20	19	14	29	2	2	1
A0A287BPP9|A0A287BPP9_PIG	Proteasome subunit beta OS=Sus scrofa OX=9823 GN=PSMB1 PE=1 SV=1	26330	21	21	24	31	12	20	33	19	19	48	31	6	6	4
F1S6Q0|F1S6Q0_PIG	Testis-specific serine kinase 6 OS=Sus scrofa OX=9823 GN=TSSK6 PE=2 SV=2	30211	30	30	8	11	7	18	11	9	36	18	12	6	2	2
F1SJQ2|F1SJQ2_PIG	Septin 3 OS=Sus scrofa OX=9823 GN=SEPT3 PE=4 SV=2	35922	20	20	29	20	21	17	26	12	11	8	6	1	0	0
A0A0B8RZ10|A0A0B8RZ10_PIG	Ubiquitin-like modifier activating enzyme 1 OS=Sus scrofa domesticus OX=9825 GN=UBA1 PE=3 SV=1	117771	27	27	19	19	20	5	11	2	4	5	0	7	25	0
K7GRY0|K7GRY0_PIG	Ubiquitin like modifier activating enzyme 1 OS=Sus scrofa OX=9823 GN=UBA1 PE=1 SV=2	117771	27	27	19	0	20	5	0	2	4	0	0	7	0	0
I3LPR1|I3LPR1_PIG	Cancer/testis antigen 83 OS=Sus scrofa OX=9823 GN=CT83 PE=4 SV=2	14128	16	16	21	13	2	18	17	5	21	13	5	2	2	0
D7EZJ4|D7EZJ4_PIG	Immunity-related GTPase family cinema protein OS=Sus scrofa OX=9823 GN=IRGC PE=2 SV=1	50264	19	19	16	19	7	19	12	13	18	10	5	0	0	0
F1RMV3|F1RMV3_PIG	Uncharacterized protein OS=Sus scrofa OX=9823 GN=IRGC PE=4 SV=1	50322	19	19	16	0	7	19	0	13	18	0	5	0	0	0
F1SAD9|F1SAD9_PIG	Protein disulfide-isomerase OS=Sus scrofa OX=9823 GN=PDIA4 PE=1 SV=1	72909	33	33	0	0	0	0	0	0	0	0	0	51	77	24
F1SK95|F1SK95_PIG	Uncharacterized protein OS=Sus scrofa OX=9823 GN=CPOX PE=1 SV=2	49158	25	25	16	27	27	0	1	3	0	1	2	1	1	0
F1RJB2|F1RJB2_PIG	Uncharacterized protein OS=Sus scrofa OX=9823 GN=UBQLNL PE=4 SV=1	66616	24	24	25	16	11	15	15	14	22	15	6	1	0	0
A0A287AE88|A0A287AE88_PIG	NADH:ubiquinone oxidoreductase subunit A9 OS=Sus scrofa OX=9823 GN=NDUFA9 PE=1 SV=1	42008	25	25	7	0	27	19	0	22	13	0	3	1	0	1
F1SL07|F1SL07_PIG	NADH:ubiquinone oxidoreductase subunit A9 OS=Sus scrofa OX=9823 GN=NDUFA9 PE=1 SV=2	42543	25	25	7	0	27	19	14	22	13	6	3	1	4	1
A0A287AWI9|A0A287AWI9_PIG	Eukaryotic translation elongation factor 2 OS=Sus scrofa OX=9823 GN=EEF2 PE=1 SV=1	95354	30	30	11	15	0	17	14	1	2	7	1	23	31	0
I3LII3|I3LII3_PIG	Eukaryotic translation elongation factor 2 OS=Sus scrofa OX=9823 GN=EEF2 PE=1 SV=2	95868	30	30	11	0	0	17	0	1	2	0	1	23	0	0
I3LL69|I3LL69_PIG	Family with sequence similarity 81 member B OS=Sus scrofa OX=9823 GN=FAM81B PE=4 SV=2	46712	26	26	13	15	2	17	12	13	21	17	8	0	3	0
A0A286ZKH3|A0A286ZKH3_PIG	Uncharacterized protein OS=Sus scrofa OX=9823 GN=SPR PE=1 SV=1	28774	22	22	14	15	29	12	13	4	15	9	0	8	14	2
K9J6M4|K9J6M4_PIG	E3 ubiquitin-protein ligase UBR4 OS=Sus scrofa OX=9823 GN=UBR4 PE=2 SV=1	572985	38	38	19	15	6	1	7	0	0	3	0	3	4	0
F1SED5|F1SED5_PIG	Proline rich 30 OS=Sus scrofa OX=9823 GN=PRR30 PE=4 SV=2	42653	25	25	48	38	11	15	27	10	9	13	7	0	0	0
F1RWT2|F1RWT2_PIG	Plastin 3 OS=Sus scrofa OX=9823 GN=PLS3 PE=1 SV=3	63851	35	32	2	5	0	8	8	0	4	5	0	6	21	0
I3LT95|I3LT95_PIG	Proteasome assembly chaperone 1 OS=Sus scrofa OX=9823 GN=BRWD1 PE=1 SV=2	32825	19	19	32	24	3	19	14	19	10	19	11	0	1	0
A0A287AKY1|A0A287AKY1_PIG	cAMP-dependent protein kinase type I-alpha regulatory subunit OS=Sus scrofa OX=9823 GN=PRKAR1A PE=4 SV=1	42921	31	29	21	29	50	11	11	9	8	8	3	2	1	6
A0A287B7K6|A0A287B7K6_PIG	Keratin 78 OS=Sus scrofa OX=9823 GN=KRT78 PE=1 SV=1	62608	27	8	13	10	0	24	21	0	24	4	0	308	22	0
Q1G1K7|Q1G1K7_PIG	Isocitrate dehydrogenase [NAD] subunit mitochondrial OS=Sus scrofa OX=9823 GN=IDH3B PE=1 SV=1	42360	25	25	8	15	31	0	10	0	0	8	0	15	6	3
F1SF27|F1SF27_PIG	Spermatogenesis associated 48 OS=Sus scrofa OX=9823 GN=SPATA48 PE=4 SV=3	49234	18	18	9	8	11	16	6	23	19	12	25	0	0	0
sp|P62936|PPIA_PIG	Peptidyl-prolyl cis-trans isomerase A OS=Sus scrofa OX=9823 GN=PPIA PE=1 SV=2	17869	19	13	23	25	4	27	20	1	18	15	1	11	31	4
F2Q9A3|F2Q9A3_PIG	Peptidyl-prolyl cis-trans isomerase OS=Sus scrofa OX=9823 GN=ppia PE=2 SV=1	17869	19	13	23	0	4	27	0	1	18	0	1	11	0	4
I3LJP1|I3LJP1_PIG	Glutamine rich 2 OS=Sus scrofa OX=9823 GN=QRICH2 PE=4 SV=2	194874	36	4	9	4	39	1	8	1	0	2	0	0	0	0
F1SRW7|F1SRW7_PIG	Cilia and flagella associated protein 65 OS=Sus scrofa OX=9823 GN=CFAP65 PE=4 SV=3	198151	27	3	1	3	7	25	28	8	17	26	11	0	0	0
A0A287AZF9|A0A287AZF9_PIG	Cytochrome c1 OS=Sus scrofa OX=9823 GN=CYC1 PE=1 SV=1	35442	21	21	3	5	33	19	12	16	26	17	13	4	9	0
I3LCN1|I3LCN1_PIG	Enolase 2 OS=Sus scrofa OX=9823 GN=ENO2 PE=1 SV=2	47197	19	1	10	1	0	8	0	0	1	1	0	18	16	0
D5K890|D5K890_PIG	Sperm acrosome associated 4 OS=Sus scrofa OX=9823 GN=SPACA4 PE=2 SV=1	13116	23	23	6	2	15	37	10	11	22	7	17	2	4	4
sp|A7Y521|CSN4_PIG	COP9 signalosome complex subunit 4 OS=Sus scrofa OX=9823 GN=COPS4 PE=2 SV=1	46269	20	20	12	19	4	12	12	10	17	14	6	4	13	0
A0A287B574|A0A287B574_PIG	Succinate--CoA ligase [ADP/GDP-forming] subunit alpha mitochondrial OS=Sus scrofa OX=9823 GN=SUCLG1 PE=3 SV=1	35534	25	25	13	0	15	0	0	0	0	0	0	10	0	3
A0A287BA50|A0A287BA50_PIG	Succinate--CoA ligase [ADP/GDP-forming] subunit alpha mitochondrial OS=Sus scrofa OX=9823 GN=SUCLG1 PE=3 SV=1	36103	25	25	13	0	15	0	0	0	0	0	0	10	0	3
sp|O19069|SUCA_PIG	Succinate--CoA ligase [ADP/GDP-forming] subunit alpha mitochondrial OS=Sus scrofa OX=9823 GN=SUCLG1 PE=1 SV=2	36117	25	25	13	5	15	0	7	0	0	1	0	10	2	3
F1S1A8|F1S1A8_PIG	NADH:ubiquinone oxidoreductase core subunit S2 OS=Sus scrofa OX=9823 GN=NDUFS2 PE=1 SV=2	53641	24	24	5	0	16	27	15	20	18	21	15	2	6	7
A0A286ZMB2|A0A286ZMB2_PIG	Folate gamma-glutamyl hydrolase OS=Sus scrofa OX=9823 GN=GGH PE=1 SV=1	35429	19	19	7	1	52	20	2	26	1	0	20	6	14	11
F1SBQ7|F1SBQ7_PIG	Putative homeodomain transcription factor 1 OS=Sus scrofa OX=9823 GN=PHTF1 PE=4 SV=3	87088	17	17	24	15	0	5	20	4	1	6	4	0	2	0
A0A287A0W4|A0A287A0W4_PIG	Putative homeodomain transcription factor 1 OS=Sus scrofa OX=9823 GN=PHTF1 PE=4 SV=1	80993	17	17	24	0	0	5	0	4	1	0	4	0	0	0
K9IVP5|K9IVP5_PIG	N-myosin-9 OS=Sus scrofa OX=9823 GN=MYH9 PE=2 SV=1	226452	32	28	4	10	0	1	9	0	1	1	0	31	33	0
A0A287AA21|A0A287AA21_PIG	Uncharacterized protein OS=Sus scrofa OX=9823 GN=ECHS1 PE=1 SV=1	31236	25	25	7	26	31	4	12	1	5	12	1	19	5	4
A0A287BCL9|A0A287BCL9_PIG	Glutamine rich 2 OS=Sus scrofa OX=9823 GN=QRICH2 PE=4 SV=1	188955	37	5	9	3	39	0	6	1	0	1	0	0	0	0
A0A287BBF3|A0A287BBF3_PIG	3-hydroxyisobutyryl-CoA hydrolase mitochondrial OS=Sus scrofa OX=9823 GN=HIBCH PE=1 SV=1	40286	23	23	4	0	15	0	0	0	1	0	0	32	0	3
A0A287B9G2|A0A287B9G2_PIG	3-hydroxyisobutyryl-CoA hydrolase mitochondrial OS=Sus scrofa OX=9823 GN=HIBCH PE=1 SV=1	43276	23	23	4	9	15	0	2	0	1	3	0	32	17	3
A0A287AL53|A0A287AL53_PIG	Abhydrolase domain containing 10 OS=Sus scrofa OX=9823 GN=ABHD10 PE=1 SV=1	33825	29	29	0	13	31	0	1	0	0	0	0	29	14	0
sp|Q3BDI7|DSG1_PIG	Desmoglein-1 OS=Sus scrofa OX=9823 GN=DSG1 PE=2 SV=1	113318	19	19	3	0	0	2	0	0	1	0	0	60	0	0
I3LA65|I3LA65_PIG	Desmoglein-1 OS=Sus scrofa OX=9823 GN=DSG1 PE=4 SV=1	113296	19	19	3	1	0	2	1	0	1	0	0	60	15	0
A0A287BIV4|A0A287BIV4_PIG	Proteasome subunit alpha type OS=Sus scrofa OX=9823 GN=PSMA4 PE=1 SV=1	29484	21	21	16	23	7	14	9	15	14	5	13	3	2	0
A0A0B8RTH9|A0A0B8RTH9_PIG	Lysophospholipase I OS=Sus scrofa domesticus OX=9825 GN=LYPLA1 PE=4 SV=1	24789	18	15	9	8	9	8	5	5	5	6	3	1	5	2
F1RSG9|F1RSG9_PIG	Uncharacterized protein OS=Sus scrofa OX=9823 GN=LYPLA1 PE=1 SV=3	24789	18	15	9	0	9	8	0	5	5	0	3	1	0	2
A0A287BE53|A0A287BE53_PIG	Kelch like family member 10 OS=Sus scrofa OX=9823 GN=KLHL10 PE=4 SV=1	68947	28	28	23	29	22	8	18	16	12	13	8	0	1	0
B2ZF47|B2ZF47_PIG	Mitochondrial aldehyde dehydrogenase 2 OS=Sus scrofa OX=9823 GN=ALDH2 PE=2 SV=1	56920	22	21	8	0	11	0	0	0	0	0	0	13	0	1
sp|Q2XQV4|ALDH2_PIG	Aldehyde dehydrogenase mitochondrial OS=Sus scrofa OX=9823 GN=ALDH2 PE=2 SV=1	56921	22	21	8	1	11	0	4	0	0	0	0	13	21	1
A0A0B8S0B6|A0A0B8S0B6_PIG	ATPase H+ transporting lysosomal 70kDa V1 subunit A OS=Sus scrofa domesticus OX=9825 GN=ATP6V1A PE=3 SV=1	68444	25	25	13	14	36	5	15	7	6	1	2	6	4	0
F1SP93|F1SP93_PIG	V-type proton ATPase catalytic subunit A OS=Sus scrofa OX=9823 GN=ATP6V1A PE=1 SV=1	68444	25	25	13	0	36	5	0	7	6	0	2	6	0	0
F2Z565|F2Z565_PIG	Solute carrier family 25 member 5 OS=Sus scrofa OX=9823 GN=SLC25A5 PE=1 SV=1	32955	30	11	5	1	18	0	0	1	0	5	0	16	36	2
A0A286ZJU5|A0A286ZJU5_PIG	Malignant T-cell-amplified sequence OS=Sus scrofa OX=9823 GN=LOC100738684 PE=1 SV=1	20546	19	19	15	14	15	29	18	12	18	10	17	2	1	0
A0A286ZT91|A0A286ZT91_PIG	Abhydrolase domain containing 16B OS=Sus scrofa OX=9823 GN=ABHD16B PE=4 SV=1	52367	25	25	22	15	3	23	23	3	21	13	2	1	0	0
A0A286ZJM8|A0A286ZJM8_PIG	Keratin 77 OS=Sus scrofa OX=9823 GN=KRT77 PE=3 SV=1	63296	25	6	14	7	0	9	8	0	11	6	0	323	38	0
I3LNT6|I3LNT6_PIG	Keratin 77 OS=Sus scrofa OX=9823 GN=KRT77 PE=3 SV=2	62898	25	6	14	0	0	9	0	0	11	0	0	323	0	0
A0A287A8E9|A0A287A8E9_PIG	Uncharacterized protein OS=Sus scrofa OX=9823 GN=KRT8 PE=1 SV=1	46178	23	4	1	0	0	7	0	0	16	0	0	102	0	0
F1SGG2|F1SGG2_PIG	Uncharacterized protein OS=Sus scrofa OX=9823 GN=KRT8 PE=1 SV=2	50408	23	4	1	0	0	7	0	0	16	0	0	102	0	0
A0A287A784|A0A287A784_PIG	Uncharacterized protein OS=Sus scrofa OX=9823 GN=KRT8 PE=1 SV=1	54427	23	4	1	0	0	7	0	0	16	0	0	102	0	0
A0A287ARG4|A0A287ARG4_PIG	Uncharacterized protein OS=Sus scrofa OX=9823 GN=KRT8 PE=1 SV=1	51763	23	4	1	5	0	7	16	0	16	5	0	102	42	0
I3LPB5|I3LPB5_PIG	Creatine kinase B-type OS=Sus scrofa OX=9823 GN=CKB PE=3 SV=2	42687	27	5	18	0	0	65	0	1	3	0	0	11	0	0
sp|Q29594|KCRB_PIG	Creatine kinase B-type OS=Sus scrofa OX=9823 GN=CKB PE=2 SV=2	42657	27	5	18	3	0	65	3	1	3	1	0	11	14	0
B6UV57|B6UV57_PIG	Nitrogen fixation 1-like protein OS=Sus scrofa OX=9823 GN=NFS1 PE=1 SV=1	50401	22	22	12	9	16	0	6	0	0	2	0	11	4	1
A0A287B088|A0A287B088_PIG	Proteasome subunit beta OS=Sus scrofa OX=9823 GN=PSMB4 PE=1 SV=1	29053	13	13	23	21	7	23	13	11	21	20	22	3	9	2
A0A286ZIE6|A0A286ZIE6_PIG	Enkurin TRPC channel interacting protein OS=Sus scrofa OX=9823 GN=ENKUR PE=4 SV=1	29891	19	19	2	0	32	19	7	20	21	24	19	1	0	1
F1SDX9|F1SDX9_PIG	Peroxiredoxin-2 OS=Sus scrofa OX=9823 GN=PRDX2 PE=4 SV=3	22210	20	1	0	0	1	0	0	0	7	0	1	91	0	25
I3L6Y1|I3L6Y1_PIG	Uncharacterized protein OS=Sus scrofa OX=9823 GN=TLE6 PE=4 SV=2	51079	20	20	0	0	0	0	0	0	0	0	0	41	49	0
A0A0B8S0C5|A0A0B8S0C5_PIG	Actinin alpha 4 OS=Sus scrofa domesticus OX=9825 GN=ACTN4 PE=4 SV=1	104905	29	3	1	11	1	0	9	0	0	0	0	34	38	2
A0A287A4Q7|A0A287A4Q7_PIG	Actinin alpha 4 OS=Sus scrofa OX=9823 GN=ACTN4 PE=1 SV=1	104905	29	3	1	0	1	0	0	0	0	0	0	34	0	2
A0A287AA30|A0A287AA30_PIG	Actinin alpha 4 OS=Sus scrofa OX=9823 GN=ACTN4 PE=1 SV=1	117026	29	3	1	0	1	0	0	0	0	0	0	34	0	2
F1SGC2|F1SGC2_PIG	Uncharacterized protein OS=Sus scrofa OX=9823 GN=CCDC39 PE=4 SV=2	110108	20	20	3	2	33	11	4	5	19	14	0	0	0	0
sp|A1XQU1|PSB7_PIG	Proteasome subunit beta type-7 OS=Sus scrofa OX=9823 GN=PSMB7 PE=2 SV=2	29980	19	19	17	9	3	6	9	6	8	8	9	1	2	0
F1SU45|F1SU45_PIG	Metalloendopeptidase OS=Sus scrofa OX=9823 GN=ASTL PE=4 SV=2	42968	21	21	0	0	0	0	0	0	9	4	9	72	53	8
I3LRS5|I3LRS5_PIG	Aldehyde dehydrogenase 1 family member A1 OS=Sus scrofa OX=9823 GN=ALDH1A1 PE=1 SV=2	54842	21	20	16	17	3	11	16	7	6	8	1	1	1	0
A0A287B1I6|A0A287B1I6_PIG	Heme oxygenase OS=Sus scrofa OX=9823 GN=HMOX2 PE=1 SV=1	35726	17	15	17	0	4	12	0	10	12	0	6	0	0	0
F1RK58|F1RK58_PIG	Heme oxygenase OS=Sus scrofa OX=9823 GN=HMOX2 PE=1 SV=2	33607	17	15	17	20	4	12	17	10	12	10	6	0	1	0
A0A287BHY5|A0A287BHY5_PIG	Uncharacterized protein OS=Sus scrofa OX=9823 GN=KRT2 PE=1 SV=1	65663	23	11	7	0	0	7	0	0	12	0	2	70	0	7
I3LGN8|I3LGN8_PIG	Plakophilin 1 OS=Sus scrofa OX=9823 GN=PKP1 PE=1 SV=2	80688	16	16	0	0	0	0	0	0	0	0	0	22	4	0
A5GFM6|A5GFM6_PIG	NACHT leucine rich repeat and PYD containing 7 (Fragment) OS=Sus scrofa OX=9823 GN=NALP7 PE=4 SV=1	104075	25	25	0	0	0	0	0	0	1	0	0	32	0	0
F1RK45|F1RK45_PIG	Uncharacterized protein OS=Sus scrofa OX=9823 GN=TRAP1 PE=1 SV=3	80957	27	26	0	0	1	0	0	0	0	0	0	41	27	5
A0A287AKT9|A0A287AKT9_PIG	Cilia and flagella associated protein 65 OS=Sus scrofa OX=9823 GN=CFAP65 PE=4 SV=1	168974	25	1	1	0	0	23	0	0	15	0	0	0	0	0
A0A287AID8|A0A287AID8_PIG	Cilia and flagella associated protein 65 OS=Sus scrofa OX=9823 GN=CFAP65 PE=4 SV=1	170772	25	1	1	0	0	23	0	0	15	0	0	0	0	0
F1SPF8|F1SPF8_PIG	DnaJ heat shock protein family (Hsp40) member B8 OS=Sus scrofa OX=9823 GN=DNAJB8 PE=4 SV=1	25494	20	17	23	17	14	21	13	19	33	9	11	1	2	0
A0A287ABC6|A0A287ABC6_PIG	Uncharacterized protein OS=Sus scrofa OX=9823 GN=CROT PE=4 SV=1	66458	24	24	0	0	0	0	0	0	0	0	0	38	24	0
A0A286ZT09|A0A286ZT09_PIG	Uncharacterized protein OS=Sus scrofa OX=9823 GN=CROT PE=4 SV=1	66766	24	24	0	0	0	0	0	0	0	0	0	38	0	0
F1SBY8|F1SBY8_PIG	Uncharacterized protein OS=Sus scrofa OX=9823 GN=CROT PE=3 SV=1	70092	24	24	0	0	0	0	0	0	0	0	0	38	0	0
A0A287BQI8|A0A287BQI8_PIG	Uncharacterized protein OS=Sus scrofa OX=9823 GN=LOC100155249 PE=1 SV=1	66183	22	5	0	14	0	2	19	0	7	8	0	92	26	0
F1SIC8|F1SIC8_PIG	TBC1 domain family member 21 OS=Sus scrofa OX=9823 GN=TBC1D21 PE=4 SV=1	39153	22	22	35	45	7	19	20	31	15	21	16	1	2	0
F1SLH0|F1SLH0_PIG	Uncharacterized protein OS=Sus scrofa OX=9823 GN=MTHFD2 PE=3 SV=3	40684	21	21	0	0	0	0	0	0	0	0	0	33	0	5
I3LQ16|I3LQ16_PIG	Uncharacterized protein OS=Sus scrofa OX=9823 GN=MTHFD2 PE=3 SV=2	40999	21	21	0	0	0	0	0	0	0	0	0	33	22	5
F1SF79|F1SF79_PIG	Schlafen like 1 OS=Sus scrofa OX=9823 GN=SLFNL1 PE=4 SV=3	44092	27	27	17	17	15	10	13	3	6	3	0	0	0	0
F1SPZ6|F1SPZ6_PIG	POC1 centriolar protein B OS=Sus scrofa OX=9823 GN=POC1B PE=4 SV=3	53458	21	21	20	0	16	10	0	16	10	0	19	0	0	1
F1SBA5|F1SBA5_PIG	Proteasome subunit alpha type OS=Sus scrofa OX=9823 GN=PSMA8 PE=3 SV=1	27928	20	10	15	18	10	11	5	13	19	21	16	2	5	0
A0A287BF02|A0A287BF02_PIG	Dynein axonemal light intermediate chain 1 OS=Sus scrofa OX=9823 GN=DNALI1 PE=4 SV=1	29690	18	18	7	5	31	13	3	7	15	4	3	0	1	5
sp|P19757|PRM2_PIG	Protamine-2 OS=Sus scrofa OX=9823 GN=PRM2 PE=2 SV=1	11807	17	17	188	12	0	2	8	0	13	12	0	0	2	0
I3LIV5|I3LIV5_PIG	Protamine-2 OS=Sus scrofa OX=9823 GN=PRM2 PE=4 SV=1	11964	17	17	188	0	0	2	0	0	13	0	0	0	0	0
A0A287BAZ5|A0A287BAZ5_PIG	Actinin alpha 4 OS=Sus scrofa OX=9823 GN=ACTN4 PE=1 SV=1	104378	27	1	1	12	1	0	8	0	0	0	0	33	39	2
F1S7B1|F1S7B1_PIG	Sperm surface protein Sp17 OS=Sus scrofa OX=9823 GN=SPA17 PE=1 SV=2	17645	17	17	3	19	47	5	4	3	8	7	1	0	1	5
A0A287B6X7|A0A287B6X7_PIG	Target of myb1 like 2 membrane trafficking protein OS=Sus scrofa OX=9823 GN=TOM1L2 PE=3 SV=1	52169	21	20	20	25	7	17	22	4	12	7	3	0	0	0
A0A287BAN7|A0A287BAN7_PIG	Target of myb1 like 2 membrane trafficking protein OS=Sus scrofa OX=9823 GN=TOM1L2 PE=3 SV=1	54448	21	20	20	0	7	17	0	4	12	0	3	0	0	0
A0A287BFP2|A0A287BFP2_PIG	Adenylate kinase 8 OS=Sus scrofa OX=9823 GN=AK8 PE=3 SV=1	45947	20	20	3	2	19	15	12	6	19	22	0	0	0	1
F1S7R5|F1S7R5_PIG	Chromosome 19 open reading frame 71 OS=Sus scrofa OX=9823 GN=C19orf71 PE=4 SV=3	24867	21	21	19	10	19	37	10	23	18	13	47	1	1	3
A0A286ZL94|A0A286ZL94_PIG	Uncharacterized protein OS=Sus scrofa OX=9823 GN=SQOR PE=1 SV=1	47566	28	28	7	0	60	0	0	0	0	0	0	0	0	2
sp|Q2QLE3|TES_PIG	Testin OS=Sus scrofa OX=9823 GN=TES PE=3 SV=1	47947	20	20	16	26	6	16	22	12	11	8	3	0	2	0
A6M930|A6M930_PIG	Eukaryotic translation initiation factor 4A isoform 2 OS=Sus scrofa OX=9823 GN=EIF4A2 PE=1 SV=1	46402	22	13	8	34	5	12	17	7	18	16	8	5	5	1
A0A287AN77|A0A287AN77_PIG	Testis expressed 43 OS=Sus scrofa OX=9823 GN=TEX43 PE=4 SV=1	15563	14	14	1	1	17	18	5	23	25	8	12	3	2	0
I3LUR5|I3LUR5_PIG	Acyl-CoA dehydrogenase family member 9 OS=Sus scrofa OX=9823 GN=ACAD9 PE=1 SV=2	68645	24	24	4	11	23	0	7	0	0	6	1	8	5	0
I3LIQ4|I3LIQ4_PIG	Cilia and flagella associated protein 126 OS=Sus scrofa OX=9823 GN=CFAP126 PE=4 SV=1	22171	14	14	3	2	22	27	6	27	9	17	12	1	0	0
A0A287AL55|A0A287AL55_PIG	Alpha-1 4 glucan phosphorylase OS=Sus scrofa OX=9823 GN=PYGB PE=1 SV=1	96273	27	24	1	14	0	2	3	0	3	3	0	30	47	3
F1SIS9|F1SIS9_PIG	NADH dehydrogenase [ubiquinone] 1 alpha subcomplex subunit 10 mitochondrial OS=Sus scrofa OX=9823 GN=NDUFA10 PE=1 SV=1	40421	19	19	5	3	22	8	7	20	7	5	2	5	0	4
F1RHM6|F1RHM6_PIG	Coiled-coil domain containing 188 OS=Sus scrofa OX=9823 GN=CCDC188 PE=4 SV=3	33241	16	16	40	20	0	14	28	15	8	15	4	0	0	0
A0A286ZXT4|A0A286ZXT4_PIG	Uncharacterized protein OS=Sus scrofa OX=9823 PE=4 SV=1	36893	21	21	1	4	6	17	3	5	21	13	1	5	0	0
K7GND3|K7GND3_PIG	DExH-box helicase 9 OS=Sus scrofa OX=9823 GN=DHX9 PE=1 SV=2	149740	23	23	20	55	0	15	85	0	7	35	0	0	2	0
A0A287A7F6|A0A287A7F6_PIG	Uncharacterized protein OS=Sus scrofa OX=9823 GN=PHB2 PE=1 SV=1	32343	22	22	3	1	25	12	2	9	9	3	9	14	16	7
I3LQN4|I3LQN4_PIG	Uncharacterized protein OS=Sus scrofa OX=9823 GN=PHB2 PE=1 SV=1	33388	22	22	3	0	25	12	0	9	9	0	9	14	0	7
F1S4N2|F1S4N2_PIG	NADH-cytochrome b5 reductase OS=Sus scrofa OX=9823 GN=CYB5R1 PE=1 SV=2	34145	18	18	10	11	10	3	4	1	2	0	0	0	0	0
K9IVC2|K9IVC2_PIG	BAG family molecular chaperone regulator 5 isoform b OS=Sus scrofa OX=9823 GN=BAG5_tv3 PE=2 SV=1	50585	20	20	15	28	11	12	24	12	5	16	4	0	0	0
A0A287AAF5|A0A287AAF5_PIG	OPA1 mitochondrial dynamin like GTPase OS=Sus scrofa OX=9823 GN=OPA1 PE=1 SV=1	115790	27	27	7	11	5	0	0	0	0	0	0	28	27	9
A0A286ZLB3|A0A286ZLB3_PIG	OPA1 mitochondrial dynamin like GTPase OS=Sus scrofa OX=9823 GN=OPA1 PE=1 SV=1	117721	27	27	7	0	5	0	0	0	0	0	0	28	0	9
K7GQK6|K7GQK6_PIG	Casein kinase II subunit beta OS=Sus scrofa OX=9823 GN=CSNK2B PE=1 SV=1	27024	16	16	19	9	0	24	15	0	8	4	0	10	10	0
sp|P67872|CSK2B_PIG	Casein kinase II subunit beta OS=Sus scrofa OX=9823 GN=CSNK2B PE=2 SV=1	24942	16	16	19	0	13	24	0	16	8	0	17	10	0	1
B9TSQ8|B9TSQ8_PIG	Casein kinase II subunit beta OS=Sus scrofa OX=9823 GN=CSNK2B PE=2 SV=1	24942	16	16	19	0	13	24	0	16	8	0	17	10	0	1
I3LTB4|I3LTB4_PIG	Cystatin OS=Sus scrofa OX=9823 GN=LOC100516302 PE=3 SV=2	17221	14	14	1	0	45	1	0	0	1	0	0	0	2	17
sp|P62802|H4_PIG	Histone H4 OS=Sus scrofa OX=9823 PE=1 SV=2	11367	17	17	10	10	6	17	7	1	14	9	3	8	35	2
F1RK79|F1RK79_PIG	Testis-specific serine kinase 2 OS=Sus scrofa OX=9823 GN=TSSK2 PE=2 SV=1	40941	21	14	13	28	31	17	25	15	11	24	18	0	0	0
F2Z513|F2Z513_PIG	Cilia and flagella associated protein 20 OS=Sus scrofa OX=9823 GN=CFAP20 PE=4 SV=1	22748	18	18	1	0	14	20	15	10	18	18	16	0	2	3
I3LS60|I3LS60_PIG	ATP-dependent (S)-NAD(P)H-hydrate dehydratase OS=Sus scrofa OX=9823 GN=CARKD PE=1 SV=2	36394	19	19	3	0	12	0	0	0	0	0	0	41	28	9
F1SSL6|F1SSL6_PIG	Proteasome subunit alpha type OS=Sus scrofa OX=9823 GN=PSMA3 PE=1 SV=1	28433	17	17	6	5	9	6	5	6	14	16	12	4	9	0
F1STB2|F1STB2_PIG	Sperm associated antigen 8 OS=Sus scrofa OX=9823 GN=SPAG8 PE=4 SV=2	53497	24	24	22	0	11	14	0	21	7	0	38	2	0	0
I3LPT7|I3LPT7_PIG	Sperm associated antigen 8 OS=Sus scrofa OX=9823 GN=SPAG8 PE=4 SV=2	48549	24	24	22	15	11	14	10	21	7	11	38	2	2	0
A0A287BA79|A0A287BA79_PIG	Sperm associated antigen 8 OS=Sus scrofa OX=9823 GN=SPAG8 PE=4 SV=1	49710	24	24	22	0	11	14	0	21	7	0	38	2	0	0
A0A287BEN1|A0A287BEN1_PIG	Uncharacterized protein OS=Sus scrofa OX=9823 GN=SPINK2 PE=1 SV=1	9497	14	14	133	0	31	74	18	39	78	21	50	5	5	10
I3LVS2|I3LVS2_PIG	Uncharacterized protein OS=Sus scrofa OX=9823 GN=LOC110255463 PE=3 SV=2	72616	20	20	6	10	9	11	9	5	8	6	2	1	0	0
A0A286ZND5|A0A286ZND5_PIG	Uncharacterized protein OS=Sus scrofa OX=9823 GN=PRDX1 PE=1 SV=1	25050	22	19	8	0	4	6	0	11	9	0	3	36	0	6
F1S3U9|F1S3U9_PIG	Uncharacterized protein OS=Sus scrofa OX=9823 GN=PRDX1 PE=1 SV=3	22249	22	19	8	17	4	6	5	11	9	3	3	36	40	6
K7GNL4|K7GNL4_PIG	Hydroxysteroid dehydrogenase like 2 OS=Sus scrofa OX=9823 GN=HSDL2 PE=1 SV=2	48217	16	16	14	19	15	3	19	0	2	6	0	11	6	0
F2Z536|F2Z536_PIG	Dynein light chain OS=Sus scrofa OX=9823 GN=DYNLL2 PE=1 SV=1	10350	15	7	16	12	55	19	13	24	25	12	8	28	39	14
A0A287AV28|A0A287AV28_PIG	Glycerol-3-phosphate dehydrogenase [NAD(+)] OS=Sus scrofa OX=9823 PE=1 SV=1	37970	19	13	8	0	47	2	0	2	2	0	2	0	0	1
A0A287BF29|A0A287BF29_PIG	Glycerol-3-phosphate dehydrogenase [NAD(+)] OS=Sus scrofa OX=9823 PE=1 SV=1	38977	19	13	8	8	47	2	5	2	2	6	2	0	0	1
I3LK43|I3LK43_PIG	NADH:ubiquinone oxidoreductase core subunit S7 OS=Sus scrofa OX=9823 GN=NDUFS7 PE=1 SV=2	21767	18	3	3	0	10	21	0	1	13	0	3	1	0	2
A0A287A2J9|A0A287A2J9_PIG	Cullin 3 OS=Sus scrofa OX=9823 GN=CUL3 PE=1 SV=1	88959	18	18	7	6	33	3	5	0	3	5	0	3	14	0
sp|Q6SEG5|UCHL1_PIG	Ubiquitin carboxyl-terminal hydrolase isozyme L1 OS=Sus scrofa OX=9823 GN=UCHL1 PE=2 SV=1	24859	14	14	3	5	11	0	4	0	0	0	0	28	33	9
F1RLB6|F1RLB6_PIG	NSF attachment protein alpha OS=Sus scrofa OX=9823 GN=NAPA PE=1 SV=2	33292	18	18	11	17	12	12	16	9	8	8	4	9	11	2
sp|Q5D144|TFAM_PIG	Transcription factor A mitochondrial OS=Sus scrofa OX=9823 GN=TFAM PE=2 SV=1	28726	25	25	22	17	18	4	11	2	6	22	0	3	14	2
F1SS26|F1SS26_PIG	Uncharacterized protein OS=Sus scrofa OX=9823 GN=THBS1 PE=1 SV=2	129546	24	24	10	4	0	5	27	0	2	11	0	0	12	1
A0A286ZSD7|A0A286ZSD7_PIG	Stomatin like 2 OS=Sus scrofa OX=9823 GN=STOML2 PE=1 SV=1	38645	17	17	1	0	16	1	1	2	3	4	7	23	8	3
I3LTE3|I3LTE3_PIG	Serine protease 54 OS=Sus scrofa OX=9823 GN=PRSS54 PE=1 SV=2	43943	17	17	34	2	41	0	0	0	1	0	0	0	2	2
F1RKX1|F1RKX1_PIG	Uncharacterized protein OS=Sus scrofa OX=9823 GN=SPACA3 PE=3 SV=2	18067	21	21	40	1	48	4	3	7	2	5	2	1	2	10
I3LQM5|I3LQM5_PIG	Protein S OS=Sus scrofa OX=9823 GN=PROS1 PE=1 SV=2	70328	19	8	7	0	0	22	0	0	11	0	0	1	0	0
A0A287A6Q0|A0A287A6Q0_PIG	Protein S OS=Sus scrofa OX=9823 GN=PROS1 PE=1 SV=1	74667	19	8	7	0	0	22	12	0	11	2	0	1	2	0
F1S0K1|F1S0K1_PIG	Uncharacterized protein OS=Sus scrofa OX=9823 GN=LOC100515166 PE=1 SV=2	45868	21	7	21	147	10	11	169	18	8	42	4	78	55	7
K7GR26|K7GR26_PIG	Tripartite motif containing 45 OS=Sus scrofa OX=9823 GN=TRIM45 PE=4 SV=2	63550	18	18	22	24	0	11	26	18	10	22	4	0	0	0
F1RKG8|F1RKG8_PIG	Uncharacterized protein OS=Sus scrofa OX=9823 GN=PEBP1 PE=1 SV=1	20972	20	20	10	1	41	0	0	0	0	0	0	10	26	5
A0A286ZPQ6|A0A286ZPQ6_PIG	Keratin 4 OS=Sus scrofa OX=9823 GN=KRT4 PE=1 SV=1	55896	24	6	13	0	0	10	0	0	6	0	0	82	0	0
I3LQN8|I3LQN8_PIG	Keratin 4 OS=Sus scrofa OX=9823 GN=KRT4 PE=1 SV=2	55389	24	6	13	157	7	10	176	8	6	44	0	82	30	1
F1RFV5|F1RFV5_PIG	Proteasome subunit beta OS=Sus scrofa OX=9823 GN=PSMB6 PE=1 SV=2	25692	15	15	9	13	3	6	11	7	10	14	6	1	1	1
G3DRF8|G3DRF8_PIG	Proteasome subunit beta OS=Sus scrofa OX=9823 GN=PSMB6 PE=2 SV=1	25433	15	15	9	0	3	6	0	7	10	0	6	1	0	1
F1SFU0|F1SFU0_PIG	Y-box binding protein 2 OS=Sus scrofa OX=9823 GN=YBX2 PE=1 SV=2	38116	15	15	0	3	0	8	10	0	4	0	0	26	3	25
A0A286ZTC0|A0A286ZTC0_PIG	Uncharacterized protein OS=Sus scrofa OX=9823 GN=CDC14B PE=4 SV=1	57046	20	20	25	19	0	8	14	5	1	8	5	0	0	0
A0A287ALM0|A0A287ALM0_PIG	Aspartyl aminopeptidase OS=Sus scrofa OX=9823 GN=DNPEP PE=1 SV=1	59150	24	24	13	17	8	6	9	3	5	6	2	5	8	1
F1SR76|F1SR76_PIG	Aspartyl aminopeptidase OS=Sus scrofa OX=9823 GN=DNPEP PE=1 SV=3	51883	24	24	13	0	8	6	0	3	5	0	2	5	0	1
A0A287ADP5|A0A287ADP5_PIG	Protein lin-7 homolog OS=Sus scrofa OX=9823 GN=LIN7A PE=1 SV=1	26003	16	16	6	8	9	16	4	11	15	6	3	0	0	0
F1RRA6|F1RRA6_PIG	Solute carrier family 25 member 31 OS=Sus scrofa OX=9823 GN=SLC25A31 PE=3 SV=2	33332	20	12	7	5	33	0	2	1	0	3	0	3	14	1
F1RX66|F1RX66_PIG	Glutathione reductase OS=Sus scrofa OX=9823 GN=GSR PE=1 SV=3	56202	21	21	1	4	12	0	0	0	0	1	0	23	22	0
F1SGR0|F1SGR0_PIG	Eukaryotic translation initiation factor 3 subunit M OS=Sus scrofa OX=9823 GN=EIF3M PE=1 SV=1	42516	15	15	17	17	6	14	14	15	9	11	10	1	10	0
F1SM09|F1SM09_PIG	IQ motif containing with AAA domain 1 OS=Sus scrofa OX=9823 GN=IQCA1 PE=4 SV=3	96931	19	18	1	0	10	15	3	2	11	3	0	0	1	0
A0A287AY61|A0A287AY61_PIG	Coiled-coil domain containing 81 OS=Sus scrofa OX=9823 GN=CCDC81 PE=4 SV=1	41330	20	1	1	0	0	15	0	0	21	0	0	0	0	0
A0A287ABK3|A0A287ABK3_PIG	Uncharacterized protein OS=Sus scrofa OX=9823 PE=4 SV=1	15119	11	1	13	0	0	12	0	0	15	0	0	0	0	0
J9JIK8|J9JIK8_PIG	Protein-L-isoaspartate O-methyltransferase OS=Sus scrofa OX=9823 GN=PCMT1 PE=3 SV=2	30294	20	20	3	0	14	2	0	2	0	0	0	2	0	1
A0A287ANM8|A0A287ANM8_PIG	Uncharacterized protein OS=Sus scrofa OX=9823 GN=GATD3A PE=1 SV=1	28826	22	22	3	10	23	0	5	0	0	2	0	5	1	1
Q8WNY6|Q8WNY6_PIG	Dynein light chain OS=Sus scrofa OX=9823 PE=2 SV=2	10882	17	2	12	0	0	9	0	0	10	0	0	15	0	0
A0A287B478|A0A287B478_PIG	Neutral alpha-glucosidase AB OS=Sus scrofa OX=9823 GN=GANAB PE=1 SV=1	109213	18	18	2	0	3	5	5	0	3	3	0	25	46	2
sp|P79403|GANAB_PIG	Neutral alpha-glucosidase AB OS=Sus scrofa OX=9823 GN=GANAB PE=1 SV=1	106662	18	18	2	0	3	5	0	0	3	0	0	25	0	2
I3LNH3|I3LNH3_PIG	Neutral alpha-glucosidase AB OS=Sus scrofa OX=9823 GN=GANAB PE=1 SV=1	106676	18	18	2	0	3	5	0	0	3	0	0	25	0	2
A0A286ZJG2|A0A286ZJG2_PIG	Ubiquitin like with PHD and ring finger domains 2 OS=Sus scrofa OX=9823 GN=UHRF2 PE=4 SV=1	89828	18	18	0	0	0	0	0	0	0	0	0	18	62	13
F1SMM6|F1SMM6_PIG	Ubiquitin like with PHD and ring finger domains 2 OS=Sus scrofa OX=9823 GN=UHRF2 PE=4 SV=3	81445	18	18	0	0	0	0	0	0	0	0	0	18	0	13
F1SB42|F1SB42_PIG	Ezrin OS=Sus scrofa OX=9823 GN=EZR PE=1 SV=2	69371	24	18	3	8	2	6	10	2	6	8	3	23	28	5
F1RPL2|F1RPL2_PIG	Histone H3 OS=Sus scrofa OX=9823 PE=3 SV=2	15224	13	1	3	0	0	9	0	0	9	0	0	2	0	0
K9IWF3|K9IWF3_PIG	Histone H3 OS=Sus scrofa OX=9823 GN=H3F3B PE=2 SV=1	15328	13	1	3	3	0	9	6	0	9	5	0	2	22	0
sp|Q71LE2|H33_PIG	Histone H3.3 OS=Sus scrofa OX=9823 GN=H3F3A PE=2 SV=3	15328	13	1	3	0	0	9	0	0	9	0	0	2	0	0
F1RLQ7|F1RLQ7_PIG	Uncharacterized protein OS=Sus scrofa OX=9823 GN=CCDC168 PE=4 SV=3	200440	26	26	23	28	1	10	10	2	6	2	1	0	0	0
F1RTQ6|F1RTQ6_PIG	Histone H2B OS=Sus scrofa OX=9823 GN=HIST1H2BA PE=1 SV=1	14123	14	7	5	3	0	22	8	0	13	4	0	2	21	0
A0A286ZNN4|A0A286ZNN4_PIG	Uncharacterized protein OS=Sus scrofa OX=9823 GN=NDUFS3 PE=1 SV=1	30201	20	20	0	0	28	11	0	29	14	5	16	2	5	4
K7GM53|K7GM53_PIG	Serine/threonine-protein phosphatase OS=Sus scrofa OX=9823 GN=PPEF1 PE=3 SV=2	69552	22	22	9	0	0	0	0	0	0	0	0	0	0	0
I3LR47|I3LR47_PIG	Serine/threonine-protein phosphatase with EF-hands OS=Sus scrofa OX=9823 GN=PPEF1 PE=3 SV=2	75253	22	22	9	12	27	0	2	0	0	1	0	0	0	1
A0A287AQ90|A0A287AQ90_PIG	Chromosome X open reading frame 57 OS=Sus scrofa OX=9823 GN=CXorf57 PE=4 SV=1	92699	15	15	21	21	0	5	29	4	6	13	6	0	1	0
F1RXM3|F1RXM3_PIG	Chromosome X open reading frame 57 OS=Sus scrofa OX=9823 GN=CXorf57 PE=4 SV=3	97679	15	15	21	0	0	5	0	4	6	0	6	0	0	0
A0A287ACY1|A0A287ACY1_PIG	RAN guanine nucleotide release factor OS=Sus scrofa OX=9823 GN=RANGRF PE=1 SV=1	16290	17	17	19	15	0	9	17	0	1	11	0	2	5	0
A0A287AY47|A0A287AY47_PIG	RAN guanine nucleotide release factor OS=Sus scrofa OX=9823 GN=RANGRF PE=1 SV=1	20169	17	17	19	0	9	9	0	7	1	0	8	2	0	2
I3LAB6|I3LAB6_PIG	Proteasome subunit alpha type OS=Sus scrofa OX=9823 GN=PSMA2 PE=1 SV=1	25899	11	11	19	17	14	3	15	13	11	22	13	3	4	0
F1RPA7|F1RPA7_PIG	Glycoprotein 2 OS=Sus scrofa OX=9823 GN=GP2 PE=1 SV=3	58072	20	20	9	6	7	0	1	15	0	2	22	0	5	0
F1RLS7|F1RLS7_PIG	Radial spoke head 14 homolog OS=Sus scrofa OX=9823 GN=RSPH14 PE=4 SV=3	37182	15	15	1	4	18	12	4	14	11	20	1	0	0	0
A0A287ASI0|A0A287ASI0_PIG	Keratin 7 OS=Sus scrofa OX=9823 GN=KRT7 PE=3 SV=1	50787	20	3	1	0	0	7	0	0	13	0	0	106	0	0
A0A287AG48|A0A287AG48_PIG	Keratin 7 OS=Sus scrofa OX=9823 GN=KRT7 PE=3 SV=1	51859	20	3	1	7	0	7	10	0	13	4	0	106	47	0
F1S297|F1S297_PIG	Isocitrate dehydrogenase [NAD] subunit mitochondrial OS=Sus scrofa OX=9823 GN=IDH3G PE=1 SV=3	41265	18	18	9	6	19	0	5	0	0	6	0	10	2	0
A0A287B4U1|A0A287B4U1_PIG	Rab GDP dissociation inhibitor OS=Sus scrofa OX=9823 GN=GDI1 PE=1 SV=1	51105	14	10	2	0	31	0	0	1	0	0	0	11	0	3
I3L893|I3L893_PIG	Rab GDP dissociation inhibitor OS=Sus scrofa OX=9823 GN=GDI1 PE=1 SV=2	48154	14	10	2	5	31	0	2	1	0	3	0	11	15	3
A0A287BPJ1|A0A287BPJ1_PIG	Rab GDP dissociation inhibitor OS=Sus scrofa OX=9823 GN=GDI1 PE=1 SV=1	55356	14	10	2	0	31	0	0	1	0	0	0	11	0	3
A0A287B9B0|A0A287B9B0_PIG	NADH:ubiquinone oxidoreductase core subunit S7 OS=Sus scrofa OX=9823 GN=NDUFS7 PE=1 SV=1	28460	17	2	2	0	10	18	4	1	11	6	3	1	5	2
F1SGT3|F1SGT3_PIG	Dihydrolipoamide acetyltransferase component of pyruvate dehydrogenase complex OS=Sus scrofa OX=9823 GN=PDHX PE=1 SV=2	51180	17	17	2	1	16	8	5	0	3	3	0	6	2	0
A0A287AT18|A0A287AT18_PIG	Proteasome subunit alpha type OS=Sus scrofa OX=9823 GN=PSMA7 PE=1 SV=1	27867	16	6	17	16	6	8	4	7	9	17	8	4	7	0
F1SI77|F1SI77_PIG	Uncharacterized protein OS=Sus scrofa OX=9823 GN=CKMT1A PE=1 SV=1	46935	21	16	1	0	0	5	0	0	0	4	2	37	93	5
A0A286ZRE9|A0A286ZRE9_PIG	CKLF like MARVEL transmembrane domain containing 2 OS=Sus scrofa OX=9823 GN=CMTM2 PE=4 SV=1	28331	13	13	17	0	2	2	0	0	2	0	0	0	0	0
sp|P80276|ALDR_PIG	Aldose reductase OS=Sus scrofa OX=9823 GN=AKR1B1 PE=1 SV=2	35868	20	19	6	8	0	3	4	0	2	5	0	8	15	0
A0A0B8S0C2|A0A0B8S0C2_PIG	Aldo-keto reductase family 1 member B1 (Aldose reductase) OS=Sus scrofa domesticus OX=9825 GN=AKR1B1 PE=4 SV=1	35867	20	19	6	0	42	3	0	2	2	0	0	8	0	4
A0A287A5M7|A0A287A5M7_PIG	Aldose reductase OS=Sus scrofa OX=9823 GN=AKR1B1 PE=4 SV=1	35867	20	19	6	0	42	3	0	2	2	0	0	8	0	4
Q95JA4|Q95JA4_PIG	Gelatinase A OS=Sus scrofa OX=9823 GN=MMP-2 PE=2 SV=1	73670	15	2	6	0	0	14	0	0	6	0	0	0	0	0
sp|P83686|NB5R3_PIG	NADH-cytochrome b5 reductase 3 (Fragment) OS=Sus scrofa OX=9823 GN=CYB5R3 PE=1 SV=1	30831	17	17	5	13	0	2	4	0	1	2	0	10	16	0
A0A286ZT52|A0A286ZT52_PIG	Proteasome 26S subunit ATPase 3 OS=Sus scrofa OX=9823 GN=PSMC3 PE=1 SV=1	54806	17	17	21	11	15	0	10	0	1	5	0	3	7	0
F1SID4|F1SID4_PIG	Proteasome 26S subunit ATPase 3 OS=Sus scrofa OX=9823 GN=PSMC3 PE=1 SV=2	49574	17	17	21	0	15	0	0	0	1	0	0	3	0	0
F1RM45|F1RM45_PIG	Apolipoprotein E OS=Sus scrofa OX=9823 GN=APOE PE=1 SV=1	36665	18	18	0	0	0	0	0	0	0	0	0	18	18	6
I3LGU2|I3LGU2_PIG	Uncharacterized protein OS=Sus scrofa OX=9823 GN=CCDC114 PE=4 SV=2	80220	12	12	9	12	38	1	2	0	2	2	0	0	0	0
A0A287B6B5|A0A287B6B5_PIG	Uncharacterized protein OS=Sus scrofa OX=9823 PE=4 SV=1	28813	12	12	16	8	6	11	12	8	14	7	7	0	0	0
F1S2N0|F1S2N0_PIG	Glutathione S-transferase zeta 1 OS=Sus scrofa OX=9823 GN=GSTZ1 PE=1 SV=2	24121	14	14	10	7	11	13	10	3	12	8	4	4	0	0
K7GLP9|K7GLP9_PIG	Uncharacterized protein OS=Sus scrofa OX=9823 GN=SMS PE=1 SV=2	41239	15	15	1	1	0	0	1	0	3	1	0	23	43	12
F1SRG9|F1SRG9_PIG	Lysozyme like 4 OS=Sus scrofa OX=9823 GN=LYZL4 PE=3 SV=2	16120	15	15	7	2	73	8	8	16	6	6	5	0	2	18
sp|P08059|G6PI_PIG	Glucose-6-phosphate isomerase OS=Sus scrofa OX=9823 GN=GPI PE=1 SV=3	63126	23	23	3	4	25	0	2	0	0	0	0	5	13	1
F1SKJ0|F1SKJ0_PIG	RBR-type E3 ubiquitin transferase OS=Sus scrofa OX=9823 GN=ARIH2 PE=1 SV=1	57557	14	14	21	21	7	7	22	15	13	18	13	0	0	0
A0A286ZZ94|A0A286ZZ94_PIG	RBR-type E3 ubiquitin transferase OS=Sus scrofa OX=9823 GN=ARIH2 PE=1 SV=1	49647	14	14	21	0	0	7	0	0	13	0	0	0	0	0
A0A287AKD1|A0A287AKD1_PIG	Chromosome 1 open reading frame 185 OS=Sus scrofa OX=9823 GN=C1orf185 PE=4 SV=1	25879	16	16	15	7	1	14	10	7	8	7	14	0	0	0
A0A287ABW8|A0A287ABW8_PIG	Succinate--CoA ligase [GDP-forming] subunit beta mitochondrial OS=Sus scrofa OX=9823 GN=SUCLG2 PE=3 SV=1	46724	18	17	1	0	8	0	0	0	0	0	0	20	6	1
A0A287BA45|A0A287BA45_PIG	Succinate--CoA ligase [GDP-forming] subunit beta mitochondrial OS=Sus scrofa OX=9823 GN=SUCLG2 PE=3 SV=1	44837	18	17	1	0	8	0	0	0	0	0	0	20	0	1
sp|P53590|SUCB2_PIG	Succinate--CoA ligase [GDP-forming] subunit beta mitochondrial (Fragment) OS=Sus scrofa OX=9823 GN=SUCLG2 PE=1 SV=2	46803	18	17	1	0	8	0	0	0	0	0	0	20	0	1
A0A286ZWJ9|A0A286ZWJ9_PIG	Succinate--CoA ligase [GDP-forming] subunit beta mitochondrial OS=Sus scrofa OX=9823 GN=SUCLG2 PE=3 SV=1	49503	18	17	1	0	8	0	0	0	0	0	0	20	0	1
F1S0V3|F1S0V3_PIG	Annexin OS=Sus scrofa OX=9823 GN=ANXA6 PE=1 SV=3	75798	22	22	0	0	0	0	0	0	0	0	0	26	0	0
M3VH45|M3VH45_PIG	Annexin OS=Sus scrofa OX=9823 GN=ANXA6 PE=2 SV=1	75869	22	22	0	0	0	0	0	0	0	0	0	26	49	0
F1SAQ8|F1SAQ8_PIG	Adenylate kinase 7 OS=Sus scrofa OX=9823 GN=AK7 PE=4 SV=3	82887	18	18	6	8	33	2	4	0	3	2	0	0	0	0
F1SA50|F1SA50_PIG	Heterogeneous nuclear ribonucleoprotein M OS=Sus scrofa OX=9823 GN=HNRNPM PE=1 SV=2	81189	15	15	10	0	0	11	0	0	7	0	0	1	0	0
F1RF11|F1RF11_PIG	Uncharacterized protein OS=Sus scrofa OX=9823 GN=MMP2 PE=1 SV=3	65621	14	1	7	0	0	14	0	0	5	0	0	0	0	0
F1SK09|F1SK09_PIG	Uncharacterized protein OS=Sus scrofa OX=9823 GN=LOC100519930 PE=1 SV=2	14122	11	11	21	11	0	11	14	4	10	28	6	2	2	0
K9IVE3|K9IVE3_PIG	Casein kinase 2 alpha 2 OS=Sus scrofa OX=9823 GN=CSNK2A2 PE=1 SV=1	41187	19	18	6	5	21	8	9	6	8	14	3	19	21	0
K7GQ35|K7GQ35_PIG	Uncharacterized protein OS=Sus scrofa OX=9823 GN=IGBP1 PE=1 SV=1	38993	17	17	7	12	26	13	18	15	8	4	12	0	4	3
F1RQ00|F1RQ00_PIG	Uncharacterized protein OS=Sus scrofa OX=9823 PE=4 SV=3	86204	16	16	11	10	5	8	21	11	5	12	16	0	0	0
A0A286ZL57|A0A286ZL57_PIG	Uncharacterized protein OS=Sus scrofa OX=9823 PE=4 SV=1	88943	16	16	11	0	5	8	0	11	5	0	16	0	0	0
F1SJU0|F1SJU0_PIG	Uncharacterized protein OS=Sus scrofa OX=9823 PE=4 SV=3	31603	14	14	3	6	15	16	10	20	17	21	15	2	0	0
sp|Q29549|CLUS_PIG	Clusterin OS=Sus scrofa OX=9823 GN=CLU PE=1 SV=1	51775	19	19	11	0	11	1	0	3	2	0	2	2	0	1
K7GND8|K7GND8_PIG	Clusterin OS=Sus scrofa OX=9823 GN=CLU PE=1 SV=2	51904	19	19	11	14	11	1	18	3	2	8	2	2	6	1
sp|Q29387|EF1G_PIG	Elongation factor 1-gamma (Fragment) OS=Sus scrofa OX=9823 GN=EEF1G PE=2 SV=2	49624	23	1	9	0	4	6	0	4	2	0	3	10	0	5
I3LMV8|I3LMV8_PIG	ATP binding cassette subfamily B member 8 OS=Sus scrofa OX=9823 GN=ABCB8 PE=1 SV=2	77069	16	16	24	16	0	0	1	0	0	1	0	2	8	0
A0A287AXF5|A0A287AXF5_PIG	Calnexin OS=Sus scrofa OX=9823 GN=CANX PE=1 SV=1	67597	21	21	0	0	0	0	0	0	0	0	0	21	0	18
I3LRR4|I3LRR4_PIG	NADH:ubiquinone oxidoreductase subunit V3 OS=Sus scrofa OX=9823 GN=NDUFV3 PE=1 SV=2	48157	15	15	2	1	17	1	5	1	1	0	0	4	3	2
A0A287BEK4|A0A287BEK4_PIG	NADH:ubiquinone oxidoreductase subunit V3 OS=Sus scrofa OX=9823 GN=NDUFV3 PE=1 SV=1	43166	15	15	2	0	17	1	0	1	1	0	0	4	0	2
F1RPW9|F1RPW9_PIG	Elongation factor 1-gamma OS=Sus scrofa OX=9823 GN=EEF1G PE=4 SV=2	48459	23	1	8	0	4	6	0	4	2	0	3	10	0	5
F1SFB7|F1SFB7_PIG	Family with sequence similarity 183 member A OS=Sus scrofa OX=9823 GN=FAM183A PE=4 SV=3	16293	13	13	0	0	8	5	1	16	13	8	9	0	0	0
A0A286ZIH3|A0A286ZIH3_PIG	Elongation factor 1-alpha OS=Sus scrofa OX=9823 GN=LOC100620900 PE=1 SV=1	49666	16	3	4	7	0	4	3	0	7	7	0	15	27	0
F1SGN4|F1SGN4_PIG	Importin 4 OS=Sus scrofa OX=9823 GN=IPO4 PE=4 SV=3	117685	18	18	12	21	0	9	16	1	6	15	2	0	1	0
F1RK80|F1RK80_PIG	Testis-specific serine kinase 1 OS=Sus scrofa OX=9823 GN=TSSK1B PE=2 SV=1	41341	14	7	6	28	25	11	18	6	7	13	10	0	0	0
F1RMZ8|F1RMZ8_PIG	ATPase H+ transporting V1 subunit B2 OS=Sus scrofa OX=9823 GN=ATP6V1B2 PE=3 SV=1	56613	18	18	8	5	18	1	3	0	0	1	0	9	1	1
A0A2C9F3A3|A0A2C9F3A3_PIG	ATP synthase subunit O mitochondrial OS=Sus scrofa OX=9823 GN=ATP5PO PE=3 SV=1	23384	20	20	7	0	29	0	0	0	0	0	0	2	0	2
I3LDC7|I3LDC7_PIG	Isocitrate dehydrogenase [NADP] OS=Sus scrofa OX=9823 GN=IDH1 PE=1 SV=2	46777	15	14	5	4	23	1	2	1	2	1	1	7	4	1
A0A287AH85|A0A287AH85_PIG	Adenylate kinase 2 mitochondrial OS=Sus scrofa OX=9823 GN=AK2 PE=1 SV=1	25640	16	16	3	13	17	0	0	0	0	0	0	10	7	11
A0A0B8S035|A0A0B8S035_PIG	Prenylcysteine oxidase 1 OS=Sus scrofa domesticus OX=9825 GN=PCYOX1 PE=3 SV=1	57002	18	18	0	0	0	0	0	0	1	0	0	26	0	0
I3L9F5|I3L9F5_PIG	Prenylcysteine oxidase 1 OS=Sus scrofa OX=9823 GN=PCYOX1 PE=1 SV=2	56989	18	18	0	0	0	0	0	0	1	0	0	26	34	0
A0A287AJQ2|A0A287AJQ2_PIG	Phosphoglycerate mutase OS=Sus scrofa OX=9823 GN=PGAM1 PE=1 SV=1	28804	13	1	4	2	14	5	1	2	7	3	1	13	8	1
F1S8Y5|F1S8Y5_PIG	Phosphoglycerate mutase OS=Sus scrofa OX=9823 GN=PGAM1 PE=1 SV=3	29923	13	1	4	0	14	5	0	2	7	0	1	13	0	1
sp|P01965|HBA_PIG	Hemoglobin subunit alpha OS=Sus scrofa OX=9823 GN=HBA PE=1 SV=1	15039	14	14	0	0	0	3	0	0	3	0	0	24	0	0
F1RGX4|F1RGX4_PIG	Uncharacterized protein OS=Sus scrofa OX=9823 GN=LOC110259958 PE=1 SV=1	15170	14	14	0	0	0	3	0	0	3	0	0	24	0	0
F1SLR1|F1SLR1_PIG	Uncharacterized protein OS=Sus scrofa OX=9823 GN=NDUFA8 PE=1 SV=3	27716	16	16	1	0	22	10	0	29	16	6	7	0	0	1
sp|Q6UAQ8|ETFB_PIG	Electron transfer flavoprotein subunit beta OS=Sus scrofa OX=9823 GN=ETFB PE=1 SV=3	27764	17	17	5	1	12	0	0	0	0	2	0	22	5	7
E1CAJ6|E1CAJ6_PIG	Protein disulfide isomerase P5 OS=Sus scrofa OX=9823 GN=pdi-p5 PE=1 SV=1	48074	17	17	0	1	1	0	0	0	0	0	0	22	32	12
I3LN92|I3LN92_PIG	NME/NM23 family member 5 OS=Sus scrofa OX=9823 GN=NME5 PE=3 SV=1	24116	12	12	5	0	18	9	7	14	13	23	0	0	0	5
F1S089|F1S089_PIG	Lactamase beta OS=Sus scrofa OX=9823 GN=LACTB PE=1 SV=1	61827	21	21	0	0	0	0	0	0	0	0	0	24	14	0
sp|P62895|CYC_PIG	Cytochrome c OS=Sus scrofa OX=9823 GN=CYCS PE=1 SV=2	11704	15	15	4	2	21	0	0	0	0	0	0	1	5	17
I3LAJ9|I3LAJ9_PIG	Histone H2B OS=Sus scrofa OX=9823 GN=LOC110261669 PE=3 SV=1	13906	11	4	3	0	0	6	0	0	5	0	0	4	0	0
F2Z584|F2Z584_PIG	Histone H2B OS=Sus scrofa OX=9823 GN=HIST1H2BD PE=3 SV=1	13936	11	4	3	0	0	6	0	0	5	0	0	4	0	0
F1RVW9|F1RVW9_PIG	Uncharacterized protein OS=Sus scrofa OX=9823 PE=4 SV=3	70631	13	13	12	0	0	7	0	4	8	0	3	0	0	0
I3LAM0|I3LAM0_PIG	Uncharacterized protein OS=Sus scrofa OX=9823 PE=4 SV=2	70959	13	13	12	10	0	7	9	4	8	9	3	0	0	0
A0A2C9F352|A0A2C9F352_PIG	Dehydrogenase/reductase SDR family member 4 OS=Sus scrofa OX=9823 GN=DHRS4 PE=1 SV=1	26311	15	15	4	3	8	0	2	0	0	0	0	16	12	0
sp|Q8WNV7|DHRS4_PIG	Dehydrogenase/reductase SDR family member 4 OS=Sus scrofa OX=9823 GN=DHRS4 PE=1 SV=2	29919	15	15	4	0	8	0	0	0	0	0	0	16	0	0
Q000H9|Q000H9_PIG	Glutathione S-transferase mu 2 OS=Sus scrofa OX=9823 PE=2 SV=1	25764	18	5	35	0	0	23	0	0	48	0	0	5	0	0
Q000H8|Q000H8_PIG	Glutathione S-transferase (Fragment) OS=Sus scrofa OX=9823 PE=3 SV=1	22368	18	5	35	0	0	23	0	0	48	0	0	5	0	0
A0A286ZPY2|A0A286ZPY2_PIG	Uncharacterized protein OS=Sus scrofa OX=9823 GN=LOC110260348 PE=3 SV=1	28739	18	5	35	0	0	23	0	0	48	0	0	5	0	0
A0A287AZ99|A0A287AZ99_PIG	Uncharacterized protein OS=Sus scrofa OX=9823 GN=LOC110260348 PE=3 SV=1	28624	18	5	35	0	0	23	0	0	48	0	0	5	0	0
A0A286ZNH2|A0A286ZNH2_PIG	Uncharacterized protein OS=Sus scrofa OX=9823 GN=LOC110260348 PE=3 SV=1	25591	18	5	35	0	0	23	0	0	48	0	0	5	0	0
F1SGS9|F1SGS9_PIG	Catalase OS=Sus scrofa OX=9823 GN=CAT PE=1 SV=2	62148	17	17	1	0	0	0	0	0	0	0	0	20	0	0
A0A286ZSG3|A0A286ZSG3_PIG	Catalase OS=Sus scrofa OX=9823 GN=CAT PE=1 SV=1	59929	17	17	1	0	0	0	0	0	0	0	0	20	22	0
A0A286ZYL7|A0A286ZYL7_PIG	ATP synthase subunit delta mitochondrial OS=Sus scrofa OX=9823 GN=ATP5F1D PE=1 SV=1	17475	14	14	17	0	18	0	1	1	0	0	0	5	2	6
C5H0C6|C5H0C6_PIG	Ubiquitin thioesterase OS=Sus scrofa OX=9823 GN=OTUB1 PE=1 SV=1	31284	12	12	6	7	2	5	3	5	3	3	2	16	30	2
F1SGG4|F1SGG4_PIG	Keratin 73 OS=Sus scrofa OX=9823 GN=KRT73 PE=3 SV=3	58788	18	2	3	0	0	7	0	0	13	0	0	67	0	0
A0A287AWU6|A0A287AWU6_PIG	Keratin 73 OS=Sus scrofa OX=9823 GN=KRT73 PE=3 SV=1	58940	18	2	3	0	0	7	0	0	13	0	0	67	0	0
A0A287AGB7|A0A287AGB7_PIG	Cilia and flagella associated protein 61 OS=Sus scrofa OX=9823 GN=CFAP61 PE=4 SV=1	140487	19	19	1	0	4	15	13	2	6	15	0	0	2	0
F1S5N5|F1S5N5_PIG	Cilia and flagella associated protein 58 OS=Sus scrofa OX=9823 GN=CFAP58 PE=4 SV=3	103711	20	20	0	0	39	0	1	0	1	3	0	0	0	0
F1STP2|F1STP2_PIG	N-acetylated alpha-linked acidic dipeptidase 2 OS=Sus scrofa OX=9823 GN=NAALAD2 PE=1 SV=3	83066	16	16	0	0	0	0	0	0	0	0	0	17	24	0
I3LDC1|I3LDC1_PIG	Succinate dehydrogenase [ubiquinone] iron-sulfur subunit mitochondrial OS=Sus scrofa OX=9823 GN=SDHB PE=1 SV=1	31585	17	17	5	2	25	0	2	0	0	0	0	11	3	0
sp|Q007T0|SDHB_PIG	Succinate dehydrogenase [ubiquinone] iron-sulfur subunit mitochondrial OS=Sus scrofa OX=9823 GN=SDHB PE=1 SV=1	31586	17	17	5	0	0	0	0	0	0	0	0	11	0	0
A0A286ZIE8|A0A286ZIE8_PIG	Solute carrier family 25 member 4 OS=Sus scrofa OX=9823 GN=SLC25A4 PE=1 SV=1	33026	17	1	5	1	0	0	0	0	0	5	0	5	15	0
F1RIJ5|F1RIJ5_PIG	DnaJ heat shock protein family (Hsp40) member C11 OS=Sus scrofa OX=9823 GN=DNAJC11 PE=1 SV=3	63353	13	13	2	8	8	8	7	4	8	4	2	0	0	0
sp|P00999|IACA_PIG	Seminal plasma acrosin inhibitor A1 OS=Sus scrofa OX=9823 PE=1 SV=1	7595	16	4	15	0	0	35	0	0	33	0	0	5	0	0
A0A287A978|A0A287A978_PIG	Radial spoke head component 1 OS=Sus scrofa OX=9823 GN=RSPH1 PE=4 SV=1	32623	12	12	3	0	14	16	0	7	8	0	2	0	0	0
A0A287BHE0|A0A287BHE0_PIG	Radial spoke head component 1 OS=Sus scrofa OX=9823 GN=RSPH1 PE=4 SV=1	34529	12	12	3	1	14	16	9	7	8	10	2	0	0	0
F1SDN7|F1SDN7_PIG	Chromosome 2 open reading frame 70 OS=Sus scrofa OX=9823 GN=C2orf70 PE=4 SV=2	23443	16	16	1	0	8	18	10	17	18	11	25	4	0	0
A0A287A699|A0A287A699_PIG	Heterogeneous nuclear ribonucleoprotein K OS=Sus scrofa OX=9823 GN=HNRNPK PE=1 SV=1	48502	14	14	10	0	0	15	0	0	12	0	0	0	0	0
I3LQS0|I3LQS0_PIG	Heterogeneous nuclear ribonucleoprotein K OS=Sus scrofa OX=9823 GN=HNRNPK PE=1 SV=2	48553	14	14	10	28	0	15	33	0	12	12	0	0	4	0
I3LDC3|I3LDC3_PIG	NADH:ubiquinone oxidoreductase subunit B10 OS=Sus scrofa OX=9823 GN=NDUFB10 PE=1 SV=1	20912	14	14	0	0	19	11	4	10	19	13	22	1	5	0
F1RF34|F1RF34_PIG	Dynein regulatory complex subunit 7 OS=Sus scrofa OX=9823 GN=DRC7 PE=4 SV=3	103119	16	16	0	1	19	10	6	2	6	0	0	0	0	0
F1SJ34|F1SJ34_PIG	Cytochrome c oxidase subunit 5A OS=Sus scrofa OX=9823 GN=COX5A PE=1 SV=1	16748	11	11	4	0	25	7	4	22	14	9	22	8	7	8
F1SAE4|F1SAE4_PIG	NME/NM23 family member 8 OS=Sus scrofa OX=9823 GN=NME8 PE=4 SV=3	58750	17	17	4	10	37	0	7	0	0	3	0	0	2	5
F1SN51|F1SN51_PIG	Inositol polyphosphate-1-phosphatase OS=Sus scrofa OX=9823 GN=INPP1 PE=1 SV=1	44501	15	15	0	1	5	0	2	0	2	0	0	19	34	2
A0A287BAW0|A0A287BAW0_PIG	Uncharacterized protein OS=Sus scrofa OX=9823 GN=NDUFA5 PE=1 SV=1	13451	14	14	1	0	10	9	1	6	20	11	3	1	2	0
A0A287BKD9|A0A287BKD9_PIG	Heterogeneous nuclear ribonucleoprotein A2/B1 OS=Sus scrofa OX=9823 GN=HNRNPA2B1 PE=1 SV=1	35959	13	13	7	20	0	10	16	0	4	5	0	1	1	0
A0A286ZI52|A0A286ZI52_PIG	Heterogeneous nuclear ribonucleoprotein A2/B1 OS=Sus scrofa OX=9823 GN=HNRNPA2B1 PE=1 SV=1	39477	13	13	7	0	0	10	0	0	4	0	0	1	0	0
M3UZ37|M3UZ37_PIG	Heterogeneous nuclear ribonucleoprotein A2/B1 OS=Sus scrofa OX=9823 GN=HNRNPA2B1 PE=1 SV=1	36006	13	13	7	0	0	10	0	0	4	0	0	1	0	0
A0A286ZYY2|A0A286ZYY2_PIG	Heterogeneous nuclear ribonucleoprotein A2/B1 OS=Sus scrofa OX=9823 GN=HNRNPA2B1 PE=1 SV=1	37430	13	13	7	0	0	10	0	0	4	0	0	1	0	0
A0A287AW32|A0A287AW32_PIG	Heterogeneous nuclear ribonucleoprotein A2/B1 OS=Sus scrofa OX=9823 GN=HNRNPA2B1 PE=1 SV=1	38403	13	13	7	0	0	10	0	0	4	0	0	1	0	0
A0A287A453|A0A287A453_PIG	Heterogeneous nuclear ribonucleoprotein A2/B1 OS=Sus scrofa OX=9823 GN=HNRNPA2B1 PE=1 SV=1	33866	13	13	7	0	0	10	0	0	4	0	0	1	0	0
A0A287ARR1|A0A287ARR1_PIG	Ferritin OS=Sus scrofa OX=9823 GN=FTH1 PE=1 SV=1	21186	15	15	5	18	37	4	6	9	8	9	13	0	1	0
K9IVR7|K9IVR7_PIG	WD repeat domain 1 OS=Sus scrofa OX=9823 GN=WDR1 PE=2 SV=1	66187	14	14	4	11	8	2	10	0	1	3	0	12	27	0
F1RTM7|F1RTM7_PIG	Profilin OS=Sus scrofa OX=9823 GN=LOC102159063 PE=3 SV=2	17082	11	11	13	30	13	17	21	22	22	18	22	2	4	8
F1SBK5|F1SBK5_PIG	Ankyrin repeat and EF-hand domain containing 1 OS=Sus scrofa OX=9823 GN=ANKEF1 PE=4 SV=1	86902	11	11	3	0	13	8	1	6	11	3	0	0	0	0
I3L9V2|I3L9V2_PIG	Vesicle amine transport 1 OS=Sus scrofa OX=9823 GN=VAT1 PE=1 SV=1	42687	17	17	1	0	9	0	0	0	0	0	0	13	16	0
F1RRB7|F1RRB7_PIG	Acetyl-CoA acyltransferase 1 OS=Sus scrofa OX=9823 GN=ACAA1 PE=1 SV=2	44501	18	18	0	0	0	0	0	0	0	0	0	27	4	0
F1SNC1|F1SNC1_PIG	Sperm flagellar protein 2 OS=Sus scrofa OX=9823 GN=SPEF2 PE=4 SV=3	208685	19	19	0	1	27	0	1	0	0	0	0	0	0	0
I3L5Q9|I3L5Q9_PIG	Uncharacterized protein OS=Sus scrofa OX=9823 PE=3 SV=2	27345	12	12	10	9	2	8	7	5	11	6	7	0	0	0
F1SJ70|F1SJ70_PIG	Outer dense fiber of sperm tails 3 like 1 OS=Sus scrofa OX=9823 GN=ODF3L1 PE=4 SV=1	30635	15	15	0	2	7	11	8	20	9	7	24	0	0	0
F1SU30|F1SU30_PIG	Coiled-coil domain containing 138 OS=Sus scrofa OX=9823 GN=CCDC138 PE=4 SV=2	76420	14	14	13	8	0	7	7	0	4	19	0	0	0	0
B0LXF7|B0LXF7_PIG	Aprotinin (Fragment) OS=Sus scrofa OX=9823 PE=4 SV=1	6700	12	7	0	0	0	0	0	0	21	2	2	364	151	146
F1RII7|F1RII7_PIG	Hemoglobin subunit beta OS=Sus scrofa OX=9823 GN=HBB PE=3 SV=1	16167	9	2	0	0	0	1	0	0	2	0	0	17	4	0
F1SQ01|F1SQ01_PIG	Peroxiredoxin 4 OS=Sus scrofa OX=9823 GN=PRDX4 PE=1 SV=1	30555	11	8	3	6	3	3	2	2	3	2	4	20	22	4
A0A0B8RTC3|A0A0B8RTC3_PIG	Peroxiredoxin 4 OS=Sus scrofa domesticus OX=9825 GN=PRDX4 PE=4 SV=1	30555	11	8	3	0	3	3	0	2	3	0	4	20	0	4
K7GLN4|K7GLN4_PIG	Peroxiredoxin 4 OS=Sus scrofa OX=9823 GN=PRDX4 PE=1 SV=2	30722	11	8	3	0	3	3	0	2	3	0	4	20	0	4
F1RFQ7|F1RFQ7_PIG	GTP-binding nuclear protein Ran OS=Sus scrofa OX=9823 GN=RAN PE=1 SV=2	24423	17	17	8	20	5	10	11	9	6	17	2	4	10	0
A0A287AJI7|A0A287AJI7_PIG	RAB11 binding and LisH domain coiled-coil and HEAT repeat containing OS=Sus scrofa OX=9823 GN=RELCH PE=1 SV=1	135609	18	7	11	0	0	0	0	0	0	0	0	0	0	0
I6YZK2|I6YZK2_PIG	Glycogen synthase kinase 3 beta variant 5 OS=Sus scrofa OX=9823 GN=GSK3B PE=2 SV=1	44445	16	16	21	17	7	6	8	2	1	1	0	0	0	0
I6ZX61|I6ZX61_PIG	Glycogen synthase kinase 3 beta variant 1 OS=Sus scrofa OX=9823 GN=GSK3B PE=1 SV=1	46760	16	16	21	0	7	6	0	2	1	0	0	0	0	0
A0A0B8S076|A0A0B8S076_PIG	Glycogen synthase kinase 3 beta OS=Sus scrofa domesticus OX=9825 GN=GSK3B PE=3 SV=1	46760	16	16	21	0	7	6	0	2	1	0	0	0	0	0
I6YP72|I6YP72_PIG	Glycogen synthase kinase 3 beta OS=Sus scrofa OX=9823 GN=GSK3B PE=1 SV=1	48050	16	16	21	0	7	6	0	2	1	0	0	0	0	0
L8B180|L8B180_PIG	IgG heavy chain OS=Sus scrofa OX=9823 GN=IGHG PE=2 SV=1	50818	15	1	0	0	0	0	0	0	0	0	0	29	0	0
sp|Q9GMB0|RPN1_PIG	Dolichyl-diphosphooligosaccharide--protein glycosyltransferase subunit 1 OS=Sus scrofa OX=9823 GN=RPN1 PE=1 SV=1	68695	15	15	2	12	0	2	3	0	1	2	0	19	27	0
A0A287BR84|A0A287BR84_PIG	Dolichyl-diphosphooligosaccharide--protein glycosyltransferase subunit 1 OS=Sus scrofa OX=9823 GN=RPN1 PE=3 SV=1	75733	15	15	2	0	0	2	0	0	1	0	0	19	0	0
A0A286ZW70|A0A286ZW70_PIG	Peptidyl-prolyl cis-trans isomerase OS=Sus scrofa OX=9823 GN=PPIB PE=1 SV=1	23785	15	14	0	0	0	4	1	0	4	0	0	11	25	0
A0A286ZKG9|A0A286ZKG9_PIG	Peptidyl-prolyl cis-trans isomerase OS=Sus scrofa OX=9823 GN=PPIB PE=1 SV=1	22283	15	14	0	0	0	4	0	0	4	0	0	11	0	0
I3LGM4|I3LGM4_PIG	Uncharacterized protein OS=Sus scrofa OX=9823 GN=NDUFA11 PE=1 SV=1	14672	9	9	2	1	15	9	4	17	9	19	16	1	4	6
A0A287A9I6|A0A287A9I6_PIG	SAMM50 sorting and assembly machinery component OS=Sus scrofa OX=9823 GN=SAMM50 PE=1 SV=1	51872	12	12	5	10	6	8	7	16	7	5	8	2	0	0
F1RT17|F1RT17_PIG	N(4)-(Beta-N-acetylglucosaminyl)-L-asparaginase OS=Sus scrofa OX=9823 GN=AGA PE=1 SV=2	36651	14	14	2	0	36	0	0	0	0	0	0	1	3	7
A0A287B8K8|A0A287B8K8_PIG	Transmembrane protein 210 OS=Sus scrofa OX=9823 GN=TMEM210 PE=4 SV=1	13886	11	11	29	0	0	29	0	0	17	0	0	2	0	0
F1S0G4|F1S0G4_PIG	Chromosome 6 open reading frame 163 OS=Sus scrofa OX=9823 GN=C6orf163 PE=4 SV=3	38565	16	16	0	0	14	4	1	9	18	5	0	0	0	0
A0A0B8RW24|A0A0B8RW24_PIG	ATP synthase subunit gamma OS=Sus scrofa domesticus OX=9825 GN=ATP5C1 PE=3 SV=1	32992	16	16	4	0	27	0	0	0	0	0	0	6	0	11
A0A287A9I8|A0A287A9I8_PIG	ATP synthase subunit gamma OS=Sus scrofa OX=9823 GN=ATP5F1C PE=3 SV=1	32992	16	16	4	0	27	0	0	0	0	0	0	6	0	11
A0A287AHM1|A0A287AHM1_PIG	ATP synthase subunit gamma OS=Sus scrofa OX=9823 GN=ATP5F1C PE=3 SV=1	32863	16	16	4	1	0	0	5	0	0	0	0	6	5	0
F1SDH5|F1SDH5_PIG	Casein kinase 1 gamma 2 OS=Sus scrofa OX=9823 GN=CSNK1G2 PE=3 SV=2	47258	14	14	5	7	11	0	2	0	0	0	0	0	0	0
I3LDE6|I3LDE6_PIG	Rhophilin associated tail protein 1 like OS=Sus scrofa OX=9823 GN=ROPN1L PE=4 SV=1	24581	15	15	12	23	24	15	17	10	6	14	4	0	0	1
F1RVI7|F1RVI7_PIG	Armadillo repeat containing 3 OS=Sus scrofa OX=9823 GN=ARMC3 PE=4 SV=3	96349	15	15	2	0	28	0	0	0	0	0	0	0	0	0
A0A286ZP09|A0A286ZP09_PIG	Armadillo repeat containing 3 OS=Sus scrofa OX=9823 GN=ARMC3 PE=4 SV=1	96722	15	15	2	3	28	0	3	0	0	2	0	0	0	0
F1RJZ6|F1RJZ6_PIG	Spermatid associated OS=Sus scrofa OX=9823 GN=SPERT PE=4 SV=2	49393	17	17	19	22	4	6	21	5	7	15	4	0	0	0
sp|Q864V5|FUND2_PIG	FUN14 domain-containing protein 2 OS=Sus scrofa OX=9823 GN=FUNDC2 PE=2 SV=1	20572	16	16	10	19	30	3	5	4	0	3	1	1	5	4
A5A4F6|A5A4F6_PIG	ADAM3a OS=Sus scrofa OX=9823 PE=2 SV=1	82947	14	14	20	0	56	0	0	1	0	0	1	0	0	8
F1RGI7|F1RGI7_PIG	Uncharacterized protein OS=Sus scrofa OX=9823 GN=MATR3 PE=1 SV=2	94733	9	9	11	0	0	17	0	0	5	0	0	0	0	0
A0A0B8RVQ4|A0A0B8RVQ4_PIG	Matrin 3 OS=Sus scrofa domesticus OX=9825 GN=MATR3 PE=4 SV=1	94733	9	9	11	0	0	17	0	0	5	0	0	0	0	0
A0A286ZWJ3|A0A286ZWJ3_PIG	Uncharacterized protein OS=Sus scrofa OX=9823 GN=MATR3 PE=1 SV=1	96456	9	9	11	35	0	17	47	0	5	76	0	0	1	0
F1RH17|F1RH17_PIG	Family with sequence similarity 71 member E1 OS=Sus scrofa OX=9823 GN=FAM71E1 PE=4 SV=2	24054	9	9	18	16	6	25	13	10	14	12	8	0	0	0
A0A287BFY2|A0A287BFY2_PIG	Uncharacterized protein OS=Sus scrofa OX=9823 GN=LOC110261265 PE=1 SV=1	24186	16	16	13	0	0	5	0	0	3	0	0	0	0	0
F1RT57|F1RT57_PIG	Protein phosphatase 1 regulatory subunit 9B OS=Sus scrofa OX=9823 GN=PPP1R9B PE=1 SV=2	88497	9	9	7	24	4	12	14	2	4	2	0	0	0	0
A0A287B4P8|A0A287B4P8_PIG	Proteasome 26S subunit ATPase 4 OS=Sus scrofa OX=9823 GN=PSMC4 PE=3 SV=1	47366	15	15	11	18	10	5	6	0	2	6	1	1	0	0
K7GSE0|K7GSE0_PIG	Leucine zipper and EF-hand containing transmembrane protein 1 OS=Sus scrofa OX=9823 GN=LETM1 PE=1 SV=2	74499	12	12	0	0	35	0	0	0	0	0	0	0	0	0
A0A287B3U1|A0A287B3U1_PIG	Endosome associated trafficking regulator 1 OS=Sus scrofa OX=9823 GN=ENTR1 PE=4 SV=1	47705	11	11	7	15	4	9	12	13	8	10	14	0	0	0
A0A287B2Z0|A0A287B2Z0_PIG	Endosome associated trafficking regulator 1 OS=Sus scrofa OX=9823 GN=ENTR1 PE=4 SV=1	41151	11	11	7	0	0	9	0	0	8	0	0	0	0	0
I3LQ82|I3LQ82_PIG	Endosome associated trafficking regulator 1 OS=Sus scrofa OX=9823 GN=ENTR1 PE=4 SV=2	45760	11	11	7	0	0	9	0	0	8	0	0	0	0	0
F1RFQ4|F1RFQ4_PIG	Piwi like RNA-mediated gene silencing 1 OS=Sus scrofa OX=9823 GN=PIWIL1 PE=1 SV=1	98541	15	15	5	70	0	12	45	0	9	30	0	2	3	0
D9YJ48|D9YJ48_PIG	Piwi-like 1 OS=Sus scrofa OX=9823 PE=2 SV=1	98472	15	15	5	0	0	12	0	0	9	0	0	2	0	0
A0A287B186|A0A287B186_PIG	Vesicle-associated membrane protein-associated protein B OS=Sus scrofa OX=9823 GN=VAPB PE=4 SV=1	27037	11	10	18	19	2	4	16	0	1	0	1	1	8	1
sp|A5GFS8|VAPB_PIG	Vesicle-associated membrane protein-associated protein B OS=Sus scrofa OX=9823 GN=VAPB PE=3 SV=1	27053	11	10	18	0	2	4	0	0	1	0	1	1	0	1
sp|P05207|KAP2_PIG	cAMP-dependent protein kinase type II-alpha regulatory subunit (Fragment) OS=Sus scrofa OX=9823 GN=PRKAR2A PE=1 SV=1	17706	10	1	16	0	0	2	0	0	1	0	0	3	0	0
A0A286ZS69|A0A286ZS69_PIG	Proteasome subunit beta OS=Sus scrofa OX=9823 GN=PSMB2 PE=1 SV=1	22780	13	13	18	16	10	7	3	18	7	16	20	1	5	0
A0A0B8RVK4|A0A0B8RVK4_PIG	Proteasome subunit beta OS=Sus scrofa domesticus OX=9825 GN=PSMB2 PE=3 SV=1	22780	13	13	18	0	10	7	0	18	7	0	20	1	0	0
A0A286ZZ91|A0A286ZZ91_PIG	Oviduct-specific glycoprotein OS=Sus scrofa OX=9823 GN=OVGP1 PE=3 SV=1	56064	13	13	0	0	0	0	0	0	0	0	0	18	3	0
A0A287ATT7|A0A287ATT7_PIG	Oviduct-specific glycoprotein OS=Sus scrofa OX=9823 GN=OVGP1 PE=3 SV=1	57095	13	13	0	0	0	0	0	0	0	0	0	18	0	0
A0A287A6T7|A0A287A6T7_PIG	Oviduct-specific glycoprotein OS=Sus scrofa OX=9823 GN=OVGP1 PE=3 SV=1	58284	13	13	0	0	0	0	0	0	0	0	0	18	0	0
sp|Q28990|OVGP1_PIG	Oviduct-specific glycoprotein OS=Sus scrofa OX=9823 GN=OVGP1 PE=2 SV=1	58519	13	13	0	0	0	0	0	0	0	0	0	18	0	0
A0A287A2R9|A0A287A2R9_PIG	Uncharacterized protein OS=Sus scrofa OX=9823 GN=YWHAE PE=1 SV=1	29174	16	15	3	21	7	4	8	0	2	8	1	12	20	4
F1RNC3|F1RNC3_PIG	Protein interacting with cyclin A1 OS=Sus scrofa OX=9823 GN=PROCA1 PE=4 SV=3	42427	15	15	21	7	4	9	17	35	5	6	12	0	0	0
F1S3H1|F1S3H1_PIG	Aldehyde dehydrogenase 6 family member A1 OS=Sus scrofa OX=9823 GN=ALDH6A1 PE=1 SV=2	57704	14	14	3	5	14	0	5	1	0	0	0	7	2	0
A0A287AAS9|A0A287AAS9_PIG	Catenin beta 1 OS=Sus scrofa OX=9823 GN=CTNNB1 PE=1 SV=1	80081	13	5	4	0	0	0	0	0	0	0	0	31	0	0
A0A287ACQ4|A0A287ACQ4_PIG	Catenin beta 1 OS=Sus scrofa OX=9823 GN=CTNNB1 PE=1 SV=1	84147	13	5	4	4	0	0	4	0	0	0	0	31	9	0
F1RX81|F1RX81_PIG	Catenin beta 1 OS=Sus scrofa OX=9823 GN=CTNNB1 PE=1 SV=2	84780	13	5	4	0	0	0	0	0	0	0	0	31	0	0
Q8WNW4|Q8WNW4_PIG	Beta-catenin OS=Sus scrofa OX=9823 GN=CTNNB1 PE=1 SV=1	85511	13	5	4	0	0	0	0	0	0	0	0	31	0	0
F1SLD2|F1SLD2_PIG	Uncharacterized protein OS=Sus scrofa OX=9823 GN=FAM136A PE=1 SV=2	16889	11	11	12	20	24	4	16	17	8	8	13	0	1	4
F1SMM8|F1SMM8_PIG	Family with sequence similarity 71 member F2 OS=Sus scrofa OX=9823 GN=FAM71F2 PE=4 SV=3	33158	10	10	20	13	3	5	11	3	4	4	0	1	0	0
F1RRD6|F1RRD6_PIG	Uncharacterized protein OS=Sus scrofa OX=9823 GN=PDCD6IP PE=1 SV=3	84454	15	15	0	1	1	4	7	0	6	2	0	6	14	0
I3L719|I3L719_PIG	Dipeptidase OS=Sus scrofa OX=9823 GN=DPEP1 PE=1 SV=1	44698	15	15	0	0	0	0	0	0	0	0	0	22	0	0
sp|P22412|DPEP1_PIG	Dipeptidase 1 OS=Sus scrofa OX=9823 GN=DPEP1 PE=1 SV=1	44700	15	15	0	0	0	0	0	0	0	0	0	22	0	0
A0A287BCG1|A0A287BCG1_PIG	ASPSCR1 UBX domain containing tether for SLC2A4 OS=Sus scrofa OX=9823 GN=ASPSCR1 PE=4 SV=1	59755	13	13	16	15	3	6	20	4	3	4	5	1	0	0
A0A287AC59|A0A287AC59_PIG	Uncharacterized protein OS=Sus scrofa OX=9823 GN=LCN5 PE=1 SV=1	19906	13	13	6	2	7	3	4	0	2	2	0	11	7	0
A0A173G6G7|A0A173G6G7_PIG	Septin 10 OS=Sus scrofa OX=9823 PE=2 SV=1	52748	14	14	7	6	32	1	8	6	3	3	0	0	0	1
I3LBW6|I3LBW6_PIG	Septin 10 OS=Sus scrofa OX=9823 GN=SEPT10 PE=1 SV=2	52720	14	14	7	0	32	1	0	6	3	0	0	0	0	1
I3LC31|I3LC31_PIG	Nucleoporin 205 OS=Sus scrofa OX=9823 GN=NUP205 PE=1 SV=2	229650	16	3	0	0	0	0	0	0	0	0	0	0	0	0
Q5S233|Q5S233_PIG	Mitochondrial associated cysteine-rich protein OS=Sus scrofa OX=9823 GN=SMCP PE=1 SV=1	11420	16	16	55	37	16	13	5	7	6	1	0	0	5	0
A0A287AIW7|A0A287AIW7_PIG	Spermatogenesis associated 7 OS=Sus scrofa OX=9823 GN=SPATA7 PE=4 SV=1	61609	12	1	11	9	2	4	6	4	2	1	2	0	0	0
A0A287AY42|A0A287AY42_PIG	Calcium/calmodulin dependent protein kinase IV OS=Sus scrofa OX=9823 GN=CAMK4 PE=1 SV=1	49791	14	14	2	0	19	9	0	1	6	0	0	0	0	0
A0A286ZKQ7|A0A286ZKQ7_PIG	Calcium/calmodulin dependent protein kinase IV OS=Sus scrofa OX=9823 GN=CAMK4 PE=1 SV=1	52174	14	14	2	0	19	9	10	1	6	10	0	0	1	0
sp|Q5S3G4|COX5B_PIG	Cytochrome c oxidase subunit 5B mitochondrial OS=Sus scrofa OX=9823 GN=COX5B PE=2 SV=1	13783	12	12	7	0	0	7	6	0	14	12	0	4	5	0
F1SU68|F1SU68_PIG	Cilia and flagella associated protein 70 OS=Sus scrofa OX=9823 GN=CFAP70 PE=4 SV=2	125865	13	13	6	2	10	3	4	0	2	4	0	0	1	0
A0A287AXJ7|A0A287AXJ7_PIG	Inositol-3-phosphate synthase 1 OS=Sus scrofa OX=9823 GN=ISYNA1 PE=4 SV=1	60785	10	10	8	5	14	2	3	0	1	0	0	4	13	0
A0A0B8RVT0|A0A0B8RVT0_PIG	Inositol-3-phosphate synthase 1 OS=Sus scrofa domesticus OX=9825 GN=ISYNA1 PE=4 SV=1	60785	10	10	8	0	14	2	0	0	1	0	0	4	0	0
A0A287ADQ1|A0A287ADQ1_PIG	Inositol-3-phosphate synthase 1 OS=Sus scrofa OX=9823 GN=ISYNA1 PE=4 SV=1	56323	10	10	8	0	0	2	0	0	1	0	0	4	0	0
A0A1B2TT55|A0A1B2TT55_PIG	Aspartate aminotransferase OS=Sus scrofa OX=9823 GN=GOT1 PE=2 SV=1	46475	13	13	4	4	19	1	3	0	0	1	0	2	2	1
sp|P00503|AATC_PIG	Aspartate aminotransferase cytoplasmic OS=Sus scrofa OX=9823 GN=GOT1 PE=1 SV=3	46475	13	13	4	0	19	1	0	0	0	0	0	2	0	1
A0A286ZWN6|A0A286ZWN6_PIG	Uncharacterized protein OS=Sus scrofa OX=9823 PE=4 SV=1	27501	12	12	0	0	2	0	0	0	0	0	1	19	0	4
A0A287A8U7|A0A287A8U7_PIG	Uncharacterized protein OS=Sus scrofa OX=9823 PE=4 SV=1	23145	12	12	0	0	2	0	0	0	0	0	1	19	0	4
F1SKR5|F1SKR5_PIG	WD repeat domain 38 OS=Sus scrofa OX=9823 GN=WDR38 PE=4 SV=2	34430	10	10	17	9	6	13	8	9	8	6	11	0	0	0
sp|P59083|PHP14_PIG	14 kDa phosphohistidine phosphatase OS=Sus scrofa OX=9823 GN=PHPT1 PE=1 SV=2	13932	12	12	8	6	15	16	6	15	12	7	11	0	0	0
B2CZR7|B2CZR7_PIG	CFL2b variant 1 OS=Sus scrofa OX=9823 GN=CFL2b PE=2 SV=1	18737	11	8	5	4	10	4	4	7	7	5	6	6	1	0
sp|Q5G6V9|COF2_PIG	Cofilin-2 OS=Sus scrofa OX=9823 GN=CFL2 PE=2 SV=4	18737	11	8	5	0	10	4	0	7	7	0	6	6	0	0
A0A286ZIC5|A0A286ZIC5_PIG	Tripartite motif containing 36 OS=Sus scrofa OX=9823 GN=TRIM36 PE=1 SV=1	82510	12	12	15	0	2	9	0	7	5	0	5	0	0	0
A0A287AB27|A0A287AB27_PIG	Tripartite motif containing 36 OS=Sus scrofa OX=9823 GN=TRIM36 PE=1 SV=1	81719	12	12	15	16	2	9	15	7	5	38	5	0	0	0
F1RLE9|F1RLE9_PIG	Tripartite motif containing 36 OS=Sus scrofa OX=9823 GN=TRIM36 PE=1 SV=3	83157	12	12	15	0	2	9	0	7	5	0	5	0	0	0
K7GPW0|K7GPW0_PIG	Tripartite motif containing 36 OS=Sus scrofa OX=9823 GN=TRIM36 PE=1 SV=2	82917	12	12	15	0	2	9	0	7	5	0	5	0	0	0
I3LQT7|I3LQT7_PIG	Ferritin OS=Sus scrofa OX=9823 GN=LOC102162930 PE=3 SV=2	20274	11	11	0	0	0	0	0	0	0	0	0	18	20	0
A0A287AN37|A0A287AN37_PIG	Ras-related protein Rab-14 OS=Sus scrofa OX=9823 GN=RAB14 PE=4 SV=1	23897	13	11	2	10	12	4	1	0	4	2	0	5	11	0
sp|Q52NJ6|RAB14_PIG	Ras-related protein Rab-14 OS=Sus scrofa OX=9823 GN=RAB14 PE=2 SV=3	23927	13	11	2	0	12	4	0	0	4	0	0	5	0	0
F1RRS3|F1RRS3_PIG	N-ethylmaleimide sensitive factor vesicle fusing ATPase OS=Sus scrofa OX=9823 GN=NSF PE=1 SV=3	83546	14	14	1	8	10	0	0	0	0	2	0	12	14	0
A0A287AYL9|A0A287AYL9_PIG	N-ethylmaleimide sensitive factor vesicle fusing ATPase OS=Sus scrofa OX=9823 GN=NSF PE=1 SV=1	85379	14	14	1	0	10	0	0	0	0	0	0	12	0	0
I3LTE8|I3LTE8_PIG	N-ethylmaleimide sensitive factor vesicle fusing ATPase OS=Sus scrofa OX=9823 GN=NSF PE=1 SV=2	83044	14	14	1	0	10	0	0	0	0	0	0	12	0	0
A0A287ANT8|A0A287ANT8_PIG	N-ethylmaleimide sensitive factor vesicle fusing ATPase OS=Sus scrofa OX=9823 GN=NSF PE=1 SV=1	82245	14	14	1	0	0	0	0	0	0	0	0	12	0	0
F1SLL4|F1SLL4_PIG	DEAD (Asp-Glu-Ala-Asp) box polypeptide 4 OS=Sus scrofa OX=9823 GN=DDX4 PE=1 SV=3	79782	11	6	6	25	0	11	24	0	7	11	0	0	0	0
F1SDE3|F1SDE3_PIG	Centromere protein V OS=Sus scrofa OX=9823 GN=CENPV PE=1 SV=2	28087	15	15	13	11	2	14	14	5	20	9	5	2	2	0
F1SPN2|F1SPN2_PIG	Coiled-coil domain containing 65 OS=Sus scrofa OX=9823 GN=CCDC65 PE=4 SV=3	58817	12	12	0	0	16	5	2	5	10	5	1	0	0	0
sp|P02067|HBB_PIG	Hemoglobin subunit beta OS=Sus scrofa OX=9823 GN=HBB PE=1 SV=3	16166	8	1	0	0	0	1	0	0	2	0	0	14	0	0
I3L8I5|I3L8I5_PIG	Eukaryotic translation initiation factor 6 OS=Sus scrofa OX=9823 GN=EIF6 PE=1 SV=2	26613	9	9	14	10	7	10	13	7	10	6	8	2	3	0
F1SND1|F1SND1_PIG	Uncharacterized protein OS=Sus scrofa OX=9823 GN=TXNDC8 PE=4 SV=3	13549	12	12	4	8	21	5	3	2	5	4	1	0	0	1
A0A287BDJ1|A0A287BDJ1_PIG	Septin 7 OS=Sus scrofa OX=9823 GN=SEPT7 PE=1 SV=1	50567	17	17	5	0	30	2	0	16	2	0	1	0	0	0
A0A173G6H5|A0A173G6H5_PIG	Septin 7 isoform 2 OS=Sus scrofa OX=9823 PE=2 SV=1	50680	17	17	5	1	30	2	2	16	2	2	1	0	0	0
A0A287B0I4|A0A287B0I4_PIG	ADP ribosylation factor like GTPase 8B OS=Sus scrofa OX=9823 GN=ARL8B PE=1 SV=1	21554	12	12	7	8	4	6	5	5	4	8	1	6	9	0
I3LQG1|I3LQG1_PIG	GLIPR1 like 1 OS=Sus scrofa OX=9823 GN=GLIPR1L1 PE=1 SV=2	26264	9	9	7	2	13	6	5	4	5	3	6	0	2	4
A0A287BCV9|A0A287BCV9_PIG	GLIPR1 like 1 OS=Sus scrofa OX=9823 GN=GLIPR1L1 PE=1 SV=1	26962	9	9	7	0	13	6	0	4	5	0	6	0	0	4
A0A287AYJ5|A0A287AYJ5_PIG	Uncharacterized protein OS=Sus scrofa OX=9823 GN=GAS6 PE=4 SV=1	74117	13	13	5	0	0	6	0	0	2	0	0	1	0	0
F1RN32|F1RN32_PIG	Uncharacterized protein OS=Sus scrofa OX=9823 GN=GAS6 PE=4 SV=3	74288	13	13	5	0	0	6	0	0	2	0	0	1	0	0
M1TFP4|M1TFP4_PIG	GAS6 OS=Sus scrofa OX=9823 GN=GAS6 PE=2 SV=1	74377	13	13	5	0	0	6	7	0	2	2	0	1	0	0
A0A287A531|A0A287A531_PIG	Annexin OS=Sus scrofa OX=9823 GN=ANXA5 PE=1 SV=1	36134	15	15	0	0	0	0	0	0	0	0	0	15	49	0
F2Z5C1|F2Z5C1_PIG	Annexin OS=Sus scrofa OX=9823 GN=ANXA5 PE=1 SV=3	36148	15	15	0	0	0	0	0	0	0	0	0	15	0	0
K7GL74|K7GL74_PIG	Uncharacterized protein OS=Sus scrofa OX=9823 GN=PRPS2 PE=1 SV=2	34783	13	6	5	0	0	8	0	0	5	0	0	2	0	0
A0A1B2TT56|A0A1B2TT56_PIG	Phosphoribosyl pyrophosphate synthetase 2 OS=Sus scrofa OX=9823 GN=PRPS2 PE=2 SV=1	34829	13	6	5	5	0	8	2	0	5	1	0	2	10	0
sp|Q9TVC1|VATH_PIG	V-type proton ATPase subunit H OS=Sus scrofa OX=9823 GN=ATP6V1H PE=2 SV=1	55850	17	17	7	0	10	7	0	1	6	0	0	0	0	0
I3LQB3|I3LQB3_PIG	V-type proton ATPase subunit H OS=Sus scrofa OX=9823 GN=ATP6V1H PE=3 SV=2	54134	17	17	7	9	10	7	11	1	6	12	0	0	0	0
F1RSG6|F1RSG6_PIG	V-type proton ATPase subunit H OS=Sus scrofa OX=9823 GN=ATP6V1H PE=3 SV=3	55866	17	17	7	0	10	7	0	1	6	0	0	0	0	0
A0A287BJ74|A0A287BJ74_PIG	Regulator of G protein signaling 22 OS=Sus scrofa OX=9823 GN=RGS22 PE=4 SV=1	146840	13	13	3	1	21	5	6	4	4	3	1	0	0	0
F1S0P1|F1S0P1_PIG	Regulator of G protein signaling 22 OS=Sus scrofa OX=9823 GN=RGS22 PE=4 SV=3	146170	13	13	3	0	21	5	0	4	4	0	1	0	0	0
F1SJP6|F1SJP6_PIG	NADH dehydrogenase [ubiquinone] 1 alpha subcomplex subunit 6 OS=Sus scrofa OX=9823 GN=NDUFA6 PE=1 SV=2	14926	10	10	0	0	7	8	0	7	11	3	0	1	0	0
F1SSR3|F1SSR3_PIG	Kinetochore localized astrin (SPAG5) binding protein OS=Sus scrofa OX=9823 GN=KNSTRN PE=4 SV=2	26753	10	10	6	4	3	12	9	9	10	7	3	0	2	0
F1RNR9|F1RNR9_PIG	WD repeat domain 66 OS=Sus scrofa OX=9823 GN=WDR66 PE=4 SV=3	136976	16	16	4	1	0	13	16	0	4	19	0	0	0	0
F1SRY6|F1SRY6_PIG	Phosphoinositide phospholipase C OS=Sus scrofa OX=9823 GN=PLCD4 PE=1 SV=3	87575	15	15	16	6	16	0	0	0	0	0	0	0	0	0
F1RFI1|F1RFI1_PIG	Elongation factor Tu OS=Sus scrofa OX=9823 GN=TUFM PE=1 SV=1	49451	15	15	2	11	11	0	12	0	0	6	0	16	12	6
A0A287A2J3|A0A287A2J3_PIG	Cysteinyl-tRNA synthetase 2 mitochondrial OS=Sus scrofa OX=9823 GN=CARS2 PE=1 SV=1	61101	14	14	1	0	6	0	0	0	0	0	0	10	23	1
A0A287BM70|A0A287BM70_PIG	Uncharacterized protein OS=Sus scrofa OX=9823 PE=4 SV=1	16876	7	7	14	8	18	3	4	3	6	3	3	0	1	1
F1RV19|F1RV19_PIG	Archaelysin family metallopeptidase 2 OS=Sus scrofa OX=9823 GN=AMZ2 PE=4 SV=3	42419	15	15	11	9	6	9	9	12	12	7	8	0	0	0
A0A287A563|A0A287A563_PIG	Archaelysin family metallopeptidase 2 OS=Sus scrofa OX=9823 GN=AMZ2 PE=4 SV=1	41555	15	15	11	0	6	9	0	12	12	0	8	0	0	0
I3L847|I3L847_PIG	IQ motif containing F1 OS=Sus scrofa OX=9823 GN=IQCF1 PE=4 SV=2	24434	16	14	9	26	4	5	21	0	11	13	3	0	0	0
F1SDN3|F1SDN3_PIG	Dynein regulatory complex subunit 1 OS=Sus scrofa OX=9823 GN=DRC1 PE=4 SV=2	76491	10	10	1	0	15	4	0	3	13	4	0	0	0	0
A0A286ZTR0|A0A286ZTR0_PIG	Dynein regulatory complex subunit 1 OS=Sus scrofa OX=9823 GN=DRC1 PE=4 SV=1	75798	10	10	1	0	15	4	0	3	13	0	0	0	0	0
sp|Q29545|ICA_PIG	Inhibitor of carbonic anhydrase OS=Sus scrofa OX=9823 GN=ICA PE=1 SV=1	77634	12	7	0	0	0	2	0	0	2	0	0	9	0	0
I3LBF1|I3LBF1_PIG	Serotransferrin OS=Sus scrofa OX=9823 GN=TF PE=3 SV=2	77622	12	7	0	0	0	2	8	0	2	7	0	9	7	0
D5K891|D5K891_PIG	Sperm acrosome associated 5 OS=Sus scrofa OX=9823 GN=SPACA5 PE=2 SV=1	18012	14	14	1	0	8	2	3	7	4	2	3	0	0	11
I3LE65|I3LE65_PIG	ATP6V1F neighbor OS=Sus scrofa OX=9823 GN=ATP6V1FNB PE=4 SV=2	24520	11	11	8	6	19	12	5	23	13	4	7	1	0	0
A0A287B9W3|A0A287B9W3_PIG	Dynein cytoplasmic 1 heavy chain 1 OS=Sus scrofa OX=9823 GN=DYNC1H1 PE=1 SV=1	428407	13	13	7	26	0	1	22	0	2	5	0	10	20	0
A0A287AN43|A0A287AN43_PIG	Terminal nucleotidyltransferase 5C OS=Sus scrofa OX=9823 GN=TENT5C PE=4 SV=1	44799	12	12	8	10	0	10	13	8	9	15	12	0	0	0
F1SAY7|F1SAY7_PIG	Terminal nucleotidyltransferase 5C OS=Sus scrofa OX=9823 GN=TENT5C PE=4 SV=2	48103	12	12	8	0	0	10	0	8	9	0	12	0	0	0
F1SDZ0|F1SDZ0_PIG	Spermatogenesis associated 7 OS=Sus scrofa OX=9823 GN=SPATA7 PE=4 SV=2	65177	12	1	11	0	2	4	0	4	1	0	2	0	0	0
A0A286ZM75|A0A286ZM75_PIG	Uncharacterized protein OS=Sus scrofa OX=9823 GN=LOC102165484 PE=4 SV=1	50239	12	12	4	4	2	9	2	3	5	2	2	0	0	0
F2Z545|F2Z545_PIG	Elongin C OS=Sus scrofa OX=9823 GN=ELOC PE=1 SV=1	12473	7	7	5	11	5	12	8	7	12	8	1	0	0	0
A0A287B6J6|A0A287B6J6_PIG	Heat shock protein family A (Hsp70) member 4 OS=Sus scrofa OX=9823 GN=HSPA4 PE=1 SV=1	95424	11	10	5	11	2	4	9	0	1	3	0	8	15	1
F1SGG5|F1SGG5_PIG	Keratin 72 OS=Sus scrofa OX=9823 GN=KRT72 PE=3 SV=2	57537	18	1	3	0	0	3	0	0	10	0	0	63	0	0
sp|P60982|DEST_PIG	Destrin OS=Sus scrofa OX=9823 GN=DSTN PE=1 SV=3	18506	16	14	5	7	10	3	7	18	7	10	15	4	2	1
A0A287BPK5|A0A287BPK5_PIG	Nucleoporin 205 OS=Sus scrofa OX=9823 GN=NUP205 PE=1 SV=1	192601	14	1	1	0	0	0	0	0	0	0	0	0	0	0
A0A286ZJQ0|A0A286ZJQ0_PIG	Histone H3 OS=Sus scrofa OX=9823 GN=LOC102161782 PE=3 SV=1	15388	11	1	2	0	0	7	0	0	6	0	0	3	0	0
A0A287AT21|A0A287AT21_PIG	Sorbitol dehydrogenase OS=Sus scrofa OX=9823 GN=SORD PE=1 SV=1	38049	11	11	5	4	0	10	2	0	4	3	0	0	0	0
A0A287BEZ2|A0A287BEZ2_PIG	RAN binding protein 17 OS=Sus scrofa OX=9823 GN=RANBP17 PE=4 SV=1	120186	15	15	12	0	0	0	0	0	1	0	0	0	0	0
F1SLY1|F1SLY1_PIG	IQ motif and ubiquitin domain containing OS=Sus scrofa OX=9823 GN=IQUB PE=4 SV=2	93486	14	14	0	1	15	5	4	2	7	7	0	0	0	1
Q7YS28|Q7YS28_PIG	Pyruvate carboxylase OS=Sus scrofa OX=9823 PE=2 SV=1	129612	17	1	3	10	0	0	2	0	0	2	0	3	0	0
A0A0B8RW47|A0A0B8RW47_PIG	Adenosine deaminase OS=Sus scrofa domesticus OX=9825 GN=ADA PE=3 SV=1	40865	14	14	0	0	0	0	0	0	0	0	0	23	22	4
F1RST3|F1RST3_PIG	Testis expressed 26 OS=Sus scrofa OX=9823 GN=TEX26 PE=4 SV=3	31216	14	14	4	5	4	13	3	8	13	11	7	0	0	0
A0A286ZVK0|A0A286ZVK0_PIG	Uncharacterized protein OS=Sus scrofa OX=9823 GN=TMEM38B PE=1 SV=1	32477	18	18	12	10	2	0	2	1	0	2	1	1	97	0
A0A286ZR94|A0A286ZR94_PIG	Myosin-11 OS=Sus scrofa OX=9823 GN=MYH11 PE=1 SV=1	202680	14	11	0	0	0	1	0	0	0	0	0	15	0	0
A0A287ASK1|A0A287ASK1_PIG	Myosin-11 OS=Sus scrofa OX=9823 GN=MYH11 PE=1 SV=1	203430	14	11	0	1	0	1	1	0	0	0	0	15	35	0
F1RQI7|F1RQI7_PIG	Unconventional myosin-VI OS=Sus scrofa OX=9823 GN=MYO6 PE=1 SV=1	144927	10	10	0	0	0	2	0	0	0	0	0	12	0	0
F1RLQ9|F1RLQ9_PIG	Tripeptidyl peptidase 2 OS=Sus scrofa OX=9823 GN=TPP2 PE=1 SV=3	134617	19	19	4	3	26	0	6	0	0	0	0	1	4	0
F1SNZ1|F1SNZ1_PIG	Leucine zipper transcription factor like 1 OS=Sus scrofa OX=9823 GN=LZTFL1 PE=1 SV=1	34546	11	11	4	8	9	9	6	3	5	4	1	0	0	0
B9TSR5|B9TSR5_PIG	Valyl-tRNA synthetase OS=Sus scrofa OX=9823 GN=VARS PE=2 SV=1	140236	14	14	4	21	0	10	9	0	3	12	0	0	15	0
A5A8V9|A5A8V9_PIG	Valyl-tRNA synthetase 2 OS=Sus scrofa OX=9823 GN=VARS2 PE=3 SV=1	140163	14	14	4	0	0	10	0	0	3	0	0	0	0	0
F1SR72|F1SR72_PIG	Acyl-CoA synthetase long chain family member 3 OS=Sus scrofa OX=9823 GN=ACSL3 PE=1 SV=2	81382	12	10	4	7	0	4	4	0	1	2	0	6	4	0
A0A0B8RZS5|A0A0B8RZS5_PIG	Acyl-CoA synthetase long-chain family member 3 OS=Sus scrofa domesticus OX=9825 GN=ACSL3 PE=4 SV=1	80276	12	10	4	0	0	4	0	0	1	0	0	6	0	0
A0A287APD5|A0A287APD5_PIG	Acyl-CoA synthetase long chain family member 3 OS=Sus scrofa OX=9823 GN=ACSL3 PE=1 SV=1	80276	12	10	4	0	0	4	0	0	1	0	0	6	0	0
B8XSJ5|B8XSJ5_PIG	Acyl-CoA synthetase long-chain family member 3 OS=Sus scrofa OX=9823 GN=ACSL3 PE=2 SV=1	80297	12	10	4	0	0	4	0	0	1	0	0	6	0	0
D0G7F3|D0G7F3_PIG	SH3 domain containing GRB2 like endophilin B1 OS=Sus scrofa OX=9823 GN=SH3GLB1 PE=1 SV=1	40683	11	11	3	0	0	0	0	0	0	0	0	0	0	0
A0A288CG11|A0A288CG11_PIG	SH3 domain containing GRB2 like endophilin B1 OS=Sus scrofa OX=9823 GN=SH3GLB1 PE=1 SV=1	45075	11	11	3	4	5	0	2	0	0	0	0	0	0	0
A0A287AKB2|A0A287AKB2_PIG	YOD1 deubiquitinase OS=Sus scrofa OX=9823 GN=YOD1 PE=1 SV=1	38192	10	10	8	10	5	5	14	3	8	6	3	4	0	0
F1RML9|F1RML9_PIG	Chromosome 11 open reading frame 42 OS=Sus scrofa OX=9823 GN=C11orf42 PE=4 SV=1	36123	12	12	9	12	0	16	14	2	5	5	5	0	0	0
Q29094|Q29094_PIG	Protein S (Fragment) OS=Sus scrofa OX=9823 GN=PROS PE=2 SV=1	71915	12	1	4	0	0	10	0	0	8	0	0	1	0	0
A0A287AP64|A0A287AP64_PIG	Short-chain-specific acyl-CoA dehydrogenase mitochondrial OS=Sus scrofa OX=9823 GN=ACADS PE=1 SV=1	42880	12	12	3	0	7	2	0	0	1	0	0	2	0	3
A0A0B8RTY5|A0A0B8RTY5_PIG	Acyl-CoA dehydrogenase C-2 to C-3 short chain OS=Sus scrofa domesticus OX=9825 GN=ACADS PE=3 SV=1	44679	12	12	3	0	7	2	0	0	1	0	0	2	0	3
A0A287A8Y8|A0A287A8Y8_PIG	Short-chain-specific acyl-CoA dehydrogenase mitochondrial OS=Sus scrofa OX=9823 GN=ACADS PE=1 SV=1	44679	12	12	3	0	7	2	0	0	1	0	0	2	0	3
F1RUV5|F1RUV5_PIG	Pyruvate carboxylase OS=Sus scrofa OX=9823 GN=PC PE=1 SV=3	129294	17	1	3	0	0	0	0	0	0	0	0	2	0	0
A0A287B7T3|A0A287B7T3_PIG	Phospholipase B-like OS=Sus scrofa OX=9823 GN=PLBD1 PE=1 SV=1	60140	15	15	1	0	52	0	0	0	0	0	0	1	0	1
I3LCG5|I3LCG5_PIG	Phospholipase B-like OS=Sus scrofa OX=9823 GN=PLBD1 PE=1 SV=2	62308	15	15	1	0	0	0	0	0	0	0	0	1	0	0
F1SUP1|F1SUP1_PIG	Uncharacterized protein OS=Sus scrofa OX=9823 GN=AKR7A2 PE=1 SV=2	40898	10	10	1	3	4	0	1	0	0	0	0	11	9	1
A0A287ABG2|A0A287ABG2_PIG	Proliferating cell nuclear antigen OS=Sus scrofa OX=9823 GN=PCNA PE=1 SV=1	28779	13	13	0	0	0	0	0	0	0	0	0	17	0	0
I3L813|I3L813_PIG	Proliferating cell nuclear antigen OS=Sus scrofa OX=9823 GN=PCNA PE=3 SV=2	29827	13	13	0	0	0	0	0	0	0	0	0	17	16	0
A0A287B9A9|A0A287B9A9_PIG	Uncharacterized protein OS=Sus scrofa OX=9823 PE=4 SV=1	38392	12	12	14	0	4	9	0	6	8	0	1	0	0	0
A0A287BR23|A0A287BR23_PIG	Uncharacterized protein OS=Sus scrofa OX=9823 PE=4 SV=1	42405	12	12	14	12	4	9	12	6	8	5	1	0	0	0
F1S6Q1|F1S6Q1_PIG	Uncharacterized protein OS=Sus scrofa OX=9823 GN=NDUFA13 PE=1 SV=3	18494	16	16	0	0	10	9	2	11	7	2	0	1	1	1
F1S2E2|F1S2E2_PIG	Annexin OS=Sus scrofa OX=9823 GN=ANXA11 PE=1 SV=2	53943	13	13	0	0	0	0	0	0	0	0	0	16	22	0
F2Z5L6|F2Z5L6_PIG	Histone H2A OS=Sus scrofa OX=9823 GN=HIST2H2AB PE=1 SV=1	13995	7	2	12	5	0	16	10	0	12	8	0	9	6	0
A0A287BG40|A0A287BG40_PIG	Uncharacterized protein OS=Sus scrofa OX=9823 GN=NDUFV2 PE=1 SV=1	27407	13	13	0	0	19	7	6	19	8	4	5	7	5	0
A0A286ZPT6|A0A286ZPT6_PIG	Uncharacterized protein OS=Sus scrofa OX=9823 GN=NDUFV2 PE=1 SV=1	25543	13	13	0	0	19	7	0	19	8	0	5	7	0	0
A0A0B8RVD2|A0A0B8RVD2_PIG	Tyrosine 3-monooxygenase/tryptophan 5-monooxygenase activation protein beta OS=Sus scrofa domesticus OX=9825 GN=YWHAB PE=3 SV=1	28112	14	7	0	2	5	3	3	0	0	0	0	9	18	5
F1SDR7|F1SDR7_PIG	Uncharacterized protein OS=Sus scrofa OX=9823 GN=YWHAB PE=1 SV=1	28112	14	7	0	0	5	3	0	0	0	0	0	9	0	5
D6BV38|D6BV38_PIG	L-gulonate 3-dehydrogenase OS=Sus scrofa OX=9823 GN=GulDH PE=2 SV=1	35057	9	9	7	11	0	8	4	6	5	6	2	0	1	0
A0A287AE42|A0A287AE42_PIG	Enoyl-CoA hydratase 1 OS=Sus scrofa OX=9823 GN=ECH1 PE=1 SV=1	39986	10	10	1	0	6	0	0	0	0	0	0	9	0	0
I3LJJ4|I3LJJ4_PIG	Enoyl-CoA hydratase 1 OS=Sus scrofa OX=9823 GN=ECH1 PE=1 SV=2	32400	10	10	1	0	6	0	0	0	0	0	0	9	0	0
Q3Y5G5|Q3Y5G5_PIG	Peroxisomal enoyl coenzyme A hydratase 1 OS=Sus scrofa OX=9823 GN=ECH1 PE=2 SV=2	35518	10	10	1	0	6	0	0	0	0	0	0	9	10	0
A0A0D5BWD2|A0A0D5BWD2_PIG	Mitochondrial complement component 1 Q subcomponent-binding protein OS=Sus scrofa OX=9823 GN=C1QBP PE=2 SV=1	31015	11	11	5	0	6	1	1	3	0	0	4	20	12	9
M3TYK5|M3TYK5_PIG	Calcium-transporting ATPase OS=Sus scrofa OX=9823 GN=ATP2B4 PE=1 SV=1	133580	15	15	1	1	2	0	0	0	0	0	0	2	0	0
I3L918|I3L918_PIG	Chromosome segregation 1 like OS=Sus scrofa OX=9823 GN=CSE1L PE=1 SV=2	103958	13	13	2	0	0	5	0	0	2	0	0	7	0	0
A0A0B8RZM8|A0A0B8RZM8_PIG	Exportin-2 OS=Sus scrofa domesticus OX=9825 GN=CSE1L PE=4 SV=1	110447	13	13	2	0	0	5	0	0	2	0	0	7	0	0
I3LPP4|I3LPP4_PIG	Chromosome segregation 1 like OS=Sus scrofa OX=9823 GN=CSE1L PE=1 SV=2	110649	13	13	2	0	0	5	0	0	2	0	0	7	0	0
sp|P09571|TRFE_PIG	Serotransferrin OS=Sus scrofa OX=9823 GN=TF PE=1 SV=2	76968	11	5	1	0	0	1	0	0	1	0	0	15	22	27
B3CL06|B3CL06_PIG	Transferrin OS=Sus scrofa OX=9823 GN=TF PE=3 SV=1	78919	11	5	1	0	0	1	0	0	1	0	0	15	0	27
A0A288CFV5|A0A288CFV5_PIG	Serotransferrin OS=Sus scrofa OX=9823 GN=TF PE=3 SV=1	78806	11	5	1	0	0	1	0	0	1	0	0	15	0	27
A0A286ZRQ7|A0A286ZRQ7_PIG	Uncharacterized protein OS=Sus scrofa OX=9823 PE=4 SV=1	17370	9	9	16	5	31	1	4	5	0	7	7	0	0	1
A0A286ZPR8|A0A286ZPR8_PIG	Cytochrome b-c1 complex subunit 7 OS=Sus scrofa OX=9823 GN=UQCRB PE=1 SV=1	13564	12	12	0	0	27	4	0	21	10	8	10	1	1	0
I3LAJ6|I3LAJ6_PIG	RAS like proto-oncogene A OS=Sus scrofa OX=9823 GN=RALA PE=1 SV=1	23522	11	7	0	0	6	0	0	0	0	0	0	21	28	0
F1SL35|F1SL35_PIG	Uncharacterized protein OS=Sus scrofa OX=9823 PE=1 SV=3	25397	13	4	28	20	14	23	26	22	48	30	13	2	4	5
F1S4R7|F1S4R7_PIG	Uncharacterized protein OS=Sus scrofa OX=9823 GN=LOC100624062 PE=4 SV=3	67468	11	11	2	0	2	0	4	0	0	6	0	0	0	0
A0A287BB72|A0A287BB72_PIG	Serine/threonine-protein phosphatase 2A 65 kDa regulatory subunit A alpha isoform OS=Sus scrofa OX=9823 GN=PPP2R1A PE=1 SV=1	78016	11	9	5	0	13	1	0	2	1	0	0	0	0	0
sp|P54612|2AAA_PIG	Serine/threonine-protein phosphatase 2A 65 kDa regulatory subunit A alpha isoform OS=Sus scrofa OX=9823 GN=PPP2R1A PE=2 SV=2	65323	11	9	5	14	13	1	10	2	1	1	0	0	2	0
F1RJM2|F1RJM2_PIG	Endoplasmic reticulum resident protein 29 OS=Sus scrofa OX=9823 GN=ERP29 PE=1 SV=2	29230	10	10	0	0	0	0	0	0	0	0	0	15	19	4
F2Z5L5|F2Z5L5_PIG	Histone H2A OS=Sus scrofa OX=9823 GN=HIST2H2AC PE=1 SV=1	13988	8	1	9	0	0	13	0	0	14	0	0	12	0	0
F2Z5L2|F2Z5L2_PIG	Histone H2A OS=Sus scrofa OX=9823 GN=LOC102159655 PE=3 SV=1	14095	8	1	9	0	0	13	0	0	14	0	0	12	0	0
F1SAR7|F1SAR7_PIG	Uncharacterized protein OS=Sus scrofa OX=9823 GN=CLMN PE=1 SV=2	111102	15	15	4	9	13	1	2	0	2	1	0	0	0	0
sp|P10775|RINI_PIG	Ribonuclease inhibitor OS=Sus scrofa OX=9823 GN=RNH1 PE=1 SV=1	49023	15	15	5	17	7	1	10	1	0	5	1	12	8	0
A0A287A4B9|A0A287A4B9_PIG	Uncharacterized protein OS=Sus scrofa OX=9823 PE=1 SV=1	19430	7	7	9	3	7	10	7	1	21	24	3	0	0	0
I3LAA0|I3LAA0_PIG	Retinoic acid receptor responder 1 OS=Sus scrofa OX=9823 GN=RARRES1 PE=4 SV=2	32871	9	9	4	0	8	5	1	9	4	1	5	0	1	1
F1SB53|F1SB53_PIG	Uncharacterized protein OS=Sus scrofa OX=9823 GN=PSMC2 PE=1 SV=2	48634	12	12	9	10	16	6	18	2	3	8	0	1	2	0
A0A287ABX4|A0A287ABX4_PIG	Ring finger protein 138 OS=Sus scrofa OX=9823 GN=RNF138 PE=4 SV=1	28219	10	10	9	5	2	10	17	5	6	5	10	0	0	0
D5K8A4|D5K8A4_PIG	Spermatogenesis associated 3 OS=Sus scrofa OX=9823 GN=SPATA3 PE=2 SV=1	22127	9	9	16	13	11	18	17	8	9	11	3	6	5	0
F1RPQ3|F1RPQ3_PIG	Proteasome 26S subunit non-ATPase 14 OS=Sus scrofa OX=9823 GN=PSMD14 PE=1 SV=3	34577	9	9	9	18	7	7	2	3	6	10	4	1	0	1
F1S6P4|F1S6P4_PIG	Growth arrest specific 8 OS=Sus scrofa OX=9823 GN=GAS8 PE=4 SV=3	55962	9	9	0	0	14	3	3	11	10	1	0	0	0	0
F1SMG3|F1SMG3_PIG	Nicotinamide nucleotide transhydrogenase OS=Sus scrofa OX=9823 GN=NNT PE=1 SV=2	113895	13	13	0	0	0	0	0	0	0	0	0	14	0	0
K9IW80|K9IW80_PIG	Nicotinamide nucleotide transhydrogenase OS=Sus scrofa OX=9823 GN=NNT PE=2 SV=1	113881	13	13	0	4	0	0	0	0	0	0	0	14	9	0
I3LHI0|I3LHI0_PIG	Keratin 23 OS=Sus scrofa OX=9823 GN=KRT23 PE=3 SV=2	46906	12	2	0	1	0	1	0	0	6	1	0	29	13	0
A0A287AXD4|A0A287AXD4_PIG	Keratin 23 OS=Sus scrofa OX=9823 GN=KRT23 PE=3 SV=1	43180	12	2	0	0	0	1	0	0	6	0	0	29	0	0
A0A287BR26|A0A287BR26_PIG	Keratin 23 OS=Sus scrofa OX=9823 GN=KRT23 PE=3 SV=1	46279	12	2	0	0	0	1	0	0	6	0	0	29	0	0
A0A286ZL11|A0A286ZL11_PIG	Keratin 80 OS=Sus scrofa OX=9823 GN=KRT80 PE=3 SV=1	48452	10	5	0	0	0	1	0	0	3	0	0	19	0	0
A0A287A2M2|A0A287A2M2_PIG	Keratin 80 OS=Sus scrofa OX=9823 GN=KRT80 PE=3 SV=1	50865	10	5	0	4	0	1	10	0	3	2	0	19	6	0
A0A286ZYM9|A0A286ZYM9_PIG	Centrosomal protein 128 OS=Sus scrofa OX=9823 GN=CEP128 PE=4 SV=1	125231	13	13	7	0	12	0	0	0	0	0	0	0	0	0
F1RUP7|F1RUP7_PIG	Nudix hydrolase 5 OS=Sus scrofa OX=9823 GN=NUDT5 PE=1 SV=2	24225	9	9	1	0	4	0	0	0	0	0	0	15	28	8
A0A287BL23|A0A287BL23_PIG	Isocitrate dehydrogenase [NADP] OS=Sus scrofa OX=9823 GN=IDH2 PE=3 SV=1	47760	14	13	9	4	9	1	2	0	0	1	0	3	3	0
F1SK00|F1SK00_PIG	Isocitrate dehydrogenase [NADP] OS=Sus scrofa OX=9823 GN=IDH2 PE=3 SV=3	50864	14	13	9	0	9	1	0	0	0	0	0	3	0	0
sp|P33198|IDHP_PIG	Isocitrate dehydrogenase [NADP] mitochondrial (Fragment) OS=Sus scrofa OX=9823 GN=IDH2 PE=1 SV=1	47526	14	13	9	0	9	1	0	0	0	0	0	3	0	0
A0A286ZMB5|A0A286ZMB5_PIG	ATP synthase subunit beta OS=Sus scrofa OX=9823 PE=3 SV=1	52410	12	1	6	0	0	0	0	0	0	0	0	8	0	0
A0A287ANH8|A0A287ANH8_PIG	ATP synthase subunit beta OS=Sus scrofa OX=9823 PE=3 SV=1	53903	12	1	6	0	0	0	0	0	0	0	0	8	0	0
A0A287B4A9|A0A287B4A9_PIG	Myeloid leukemia factor 1 OS=Sus scrofa OX=9823 GN=MLF1 PE=4 SV=1	29628	11	11	1	4	13	7	8	14	13	10	12	0	0	0
F1RVA0|F1RVA0_PIG	Histone H3 OS=Sus scrofa OX=9823 GN=LOC110261664 PE=2 SV=2	15404	10	4	2	0	0	8	0	0	6	0	0	2	0	0
A0A287BKF7|A0A287BKF7_PIG	Histone H3 OS=Sus scrofa OX=9823 PE=3 SV=1	14677	10	4	2	0	0	8	0	0	6	0	0	2	0	0
I3LH35|I3LH35_PIG	Spermatogenesis and centriole associated 1 like OS=Sus scrofa OX=9823 GN=SPATC1L PE=4 SV=2	37921	11	6	10	13	11	5	11	5	5	4	2	0	0	0
E2IUK8|E2IUK8_PIG	Oocyte expressed protein OS=Sus scrofa OX=9823 GN=OOEP PE=2 SV=1	16626	12	12	0	0	0	0	0	0	1	0	0	27	20	7
F1SKY2|F1SKY2_PIG	Nitrilase family member 2 OS=Sus scrofa OX=9823 GN=NIT2 PE=1 SV=3	31192	12	12	0	0	3	0	0	0	0	0	0	15	8	1
F2Z5N6|F2Z5N6_PIG	Serine/threonine-protein phosphatase OS=Sus scrofa OX=9823 GN=PPP6C PE=1 SV=1	35144	9	9	4	7	5	8	7	6	7	6	4	2	0	0
A0A286ZLE0|A0A286ZLE0_PIG	RAB11 binding and LisH domain coiled-coil and HEAT repeat containing OS=Sus scrofa OX=9823 GN=RELCH PE=1 SV=1	112011	12	1	5	0	0	0	0	0	0	0	0	0	0	0
F2Z5B4|F2Z5B4_PIG	Heterogeneous nuclear ribonucleoprotein A3 OS=Sus scrofa OX=9823 GN=HNRNPA3 PE=1 SV=2	39595	11	11	5	26	0	8	19	0	4	9	0	0	0	0
Q197W4|Q197W4_PIG	Cyclin-dependent kinase 5 OS=Sus scrofa OX=9823 GN=CDK5 PE=1 SV=2	33288	11	11	0	0	0	0	0	0	0	1	0	16	20	0
A0A287AYC9|A0A287AYC9_PIG	WD repeat domain 63 OS=Sus scrofa OX=9823 GN=WDR63 PE=4 SV=1	102272	10	10	1	0	24	2	0	1	1	0	0	0	0	0
A0A286ZT81|A0A286ZT81_PIG	WD repeat domain 63 OS=Sus scrofa OX=9823 GN=WDR63 PE=4 SV=1	103905	10	10	1	0	24	2	5	1	1	1	0	0	0	0
A0A287ASY9|A0A287ASY9_PIG	Serine racemase OS=Sus scrofa OX=9823 GN=SRR PE=4 SV=1	35699	8	8	8	11	5	2	9	3	3	5	1	0	0	0
A0A287B1I4|A0A287B1I4_PIG	Uncharacterized protein OS=Sus scrofa OX=9823 GN=DCTN1 PE=1 SV=1	138422	12	12	0	3	13	0	4	0	0	0	0	0	2	1
A0A286ZRC7|A0A286ZRC7_PIG	Uncharacterized protein OS=Sus scrofa OX=9823 GN=DCTN1 PE=1 SV=1	138471	12	12	0	0	13	0	0	0	0	0	0	0	0	1
F1SNT8|F1SNT8_PIG	Uncharacterized protein OS=Sus scrofa OX=9823 GN=DCTN1 PE=1 SV=3	139887	12	12	0	0	13	0	0	0	0	0	0	0	0	1
A7XXV9|A7XXV9_PIG	NAD-dependent protein deacylase sirtuin-5 mitochondrial OS=Sus scrofa OX=9823 GN=SIRT5 PE=2 SV=1	33619	11	11	0	0	10	0	0	0	0	0	0	8	0	0
B0FWP7|B0FWP7_PIG	NAD-dependent protein deacylase sirtuin-5 mitochondrial OS=Sus scrofa OX=9823 GN=SIRT5 PE=2 SV=1	33590	11	11	0	1	10	0	0	0	0	0	0	8	5	0
A0A287AQS7|A0A287AQS7_PIG	Uncharacterized protein OS=Sus scrofa OX=9823 GN=SCO2 PE=1 SV=1	29594	7	7	5	9	4	2	4	1	1	1	0	0	0	0
F1RG75|F1RG75_PIG	Phosphorylase kinase catalytic subunit gamma 2 OS=Sus scrofa OX=9823 GN=PHKG2 PE=1 SV=1	46556	10	10	9	6	1	9	14	5	6	8	3	0	0	0
A0A286ZYM6|A0A286ZYM6_PIG	ATP synthase peripheral stalk-membrane subunit b OS=Sus scrofa OX=9823 GN=ATP5PB PE=1 SV=1	28627	12	12	0	0	15	0	0	0	0	0	0	2	3	1
A0A287BSD3|A0A287BSD3_PIG	Chromosome 9 open reading frame 116 OS=Sus scrofa OX=9823 GN=C9orf116 PE=4 SV=1	15674	6	6	8	5	2	5	4	2	9	3	2	0	0	0
O77818|O77818_PIG	Cysteine-rich secretory protein-3 (Fragment) OS=Sus scrofa OX=9823 GN=crisp-3 PE=2 SV=1	8808	6	1	25	0	0	21	0	0	19	0	0	2	0	0
A0A287BHL2|A0A287BHL2_PIG	Phosphoglycolate phosphatase OS=Sus scrofa OX=9823 GN=PGP PE=1 SV=1	34290	11	11	5	7	3	8	10	2	11	6	3	1	0	0
sp|P10668|COF1_PIG	Cofilin-1 OS=Sus scrofa OX=9823 GN=CFL1 PE=1 SV=3	18519	10	7	3	6	1	1	3	0	1	3	0	5	1	0
K7GQY9|K7GQY9_PIG	Cofilin-1 OS=Sus scrofa OX=9823 GN=CFL1 PE=1 SV=2	21876	10	7	3	0	1	1	0	0	1	0	0	5	0	0
A0A286ZPY4|A0A286ZPY4_PIG	Testis expressed 35 OS=Sus scrofa OX=9823 GN=TEX35 PE=4 SV=1	23336	8	8	14	12	1	2	6	6	5	3	1	0	0	0
A0A287AZX2|A0A287AZX2_PIG	Uncharacterized protein OS=Sus scrofa OX=9823 PE=4 SV=1	26138	9	4	17	2	0	14	2	0	9	1	0	0	0	0
A0A287BJQ2|A0A287BJQ2_PIG	NADH:ubiquinone oxidoreductase core subunit S8 OS=Sus scrofa OX=9823 GN=NDUFS8 PE=1 SV=1	27097	6	6	1	0	14	7	6	9	6	6	1	2	4	2
A0A286ZUN9|A0A286ZUN9_PIG	NADH:ubiquinone oxidoreductase core subunit S8 OS=Sus scrofa OX=9823 GN=NDUFS8 PE=1 SV=1	23787	6	6	1	0	14	7	0	9	6	0	1	2	0	2
A0A286ZZC2|A0A286ZZC2_PIG	NADH:ubiquinone oxidoreductase core subunit S8 OS=Sus scrofa OX=9823 GN=NDUFS8 PE=1 SV=1	23863	6	6	1	0	14	7	0	9	6	0	1	2	0	2
F1RKY8|F1RKY8_PIG	Phosphomannomutase OS=Sus scrofa OX=9823 GN=PMM2 PE=1 SV=2	28014	10	10	11	8	2	5	7	3	3	9	6	0	0	0
F1SB15|F1SB15_PIG	5' 3'-nucleotidase mitochondrial OS=Sus scrofa OX=9823 GN=NT5M PE=4 SV=1	26158	11	11	4	2	6	6	2	3	6	2	4	0	0	0
F1SIX3|F1SIX3_PIG	UTP--glucose-1-phosphate uridylyltransferase OS=Sus scrofa OX=9823 GN=UGP2 PE=1 SV=3	55680	10	10	1	2	12	0	0	0	0	1	0	7	25	0
sp|P79303|UGPA_PIG	UTP--glucose-1-phosphate uridylyltransferase OS=Sus scrofa OX=9823 GN=UGP2 PE=2 SV=3	56961	10	10	1	0	0	0	0	0	0	0	0	7	0	0
A0A287ABI6|A0A287ABI6_PIG	Dynein regulatory complex subunit 3 OS=Sus scrofa OX=9823 GN=DRC3 PE=4 SV=1	58676	11	11	0	3	9	3	5	1	9	1	0	0	0	0
F1RV80|F1RV80_PIG	TBC1 domain family member 7 OS=Sus scrofa OX=9823 GN=TBC1D7 PE=4 SV=2	30672	8	8	7	0	0	5	0	0	8	0	0	0	0	0
A0A287A809|A0A287A809_PIG	TBC1 domain family member 7 OS=Sus scrofa OX=9823 GN=TBC1D7 PE=4 SV=1	33891	8	8	7	5	0	5	6	6	8	11	3	0	0	0
K7GPJ4|K7GPJ4_PIG	Acyl-CoA thioesterase 9 OS=Sus scrofa OX=9823 GN=ACOT9 PE=1 SV=2	51305	12	12	0	0	8	0	0	0	0	0	0	14	16	0
F2Z572|F2Z572_PIG	Uncharacterized protein OS=Sus scrofa OX=9823 GN=PRPS1 PE=1 SV=1	34834	11	4	3	4	5	3	2	2	2	1	0	3	13	0
I3LGD9|I3LGD9_PIG	Agrin OS=Sus scrofa OX=9823 GN=AGRN PE=1 SV=2	216437	8	8	1	0	0	11	0	0	7	0	0	0	0	0
A0A286ZS39|A0A286ZS39_PIG	Agrin OS=Sus scrofa OX=9823 GN=AGRN PE=1 SV=1	223046	8	8	1	0	0	11	0	0	7	0	0	0	0	0
A0A287BRA3|A0A287BRA3_PIG	Agrin OS=Sus scrofa OX=9823 GN=AGRN PE=1 SV=1	216061	8	8	1	0	0	11	0	0	7	0	0	0	0	0
A0A287BPU0|A0A287BPU0_PIG	Agrin OS=Sus scrofa OX=9823 GN=AGRN PE=1 SV=1	201865	8	8	1	0	0	11	0	0	7	0	0	0	0	0
A0A286ZW89|A0A286ZW89_PIG	Agrin OS=Sus scrofa OX=9823 GN=AGRN PE=1 SV=1	190463	8	8	1	0	0	11	0	0	7	0	0	0	0	0
A0A287B6G6|A0A287B6G6_PIG	Agrin OS=Sus scrofa OX=9823 GN=AGRN PE=1 SV=1	199349	8	8	1	0	0	11	0	0	7	0	0	0	0	0
M3TYQ4|M3TYQ4_PIG	EFR3-like A OS=Sus scrofa OX=9823 GN=EFR3A PE=2 SV=1	92852	14	14	10	0	7	0	0	0	0	0	0	0	0	0
A0A287AYC0|A0A287AYC0_PIG	EFR3 homolog A OS=Sus scrofa OX=9823 GN=EFR3A PE=1 SV=1	92765	14	14	10	0	7	0	0	0	0	0	0	0	0	0
I3LSC5|I3LSC5_PIG	EFR3 homolog A OS=Sus scrofa OX=9823 GN=EFR3A PE=1 SV=2	88759	14	14	10	0	0	0	0	0	0	0	0	0	0	0
Q2A6Z6|Q2A6Z6_PIG	K6-irs1 keratin (Fragment) OS=Sus scrofa OX=9823 GN=K6-irs1 PE=2 SV=1	51272	14	2	1	0	0	1	0	0	5	0	0	54	0	0
A0A287BI27|A0A287BI27_PIG	TBC1 domain family member 31 OS=Sus scrofa OX=9823 GN=TBC1D31 PE=4 SV=1	124310	10	10	12	0	0	6	0	0	1	0	0	0	0	0
A0A287B550|A0A287B550_PIG	TBC1 domain family member 31 OS=Sus scrofa OX=9823 GN=TBC1D31 PE=4 SV=1	116417	10	10	12	0	0	6	0	0	1	0	0	0	0	0
A0A287AVV2|A0A287AVV2_PIG	Voltage-dependent anion-selective channel protein 1 OS=Sus scrofa OX=9823 GN=VDAC1 PE=1 SV=1	32072	13	8	9	8	5	20	2	4	10	7	6	11	9	1
sp|Q9MZ16|VDAC1_PIG	Voltage-dependent anion-selective channel protein 1 OS=Sus scrofa OX=9823 GN=VDAC1 PE=2 SV=3	30727	13	8	9	0	5	20	0	4	10	0	6	11	0	1
K7GM09|K7GM09_PIG	Uncharacterized protein OS=Sus scrofa OX=9823 PE=4 SV=2	38172	8	8	1	0	1	10	6	3	4	4	0	0	0	0
A0A287BKK8|A0A287BKK8_PIG	Uncharacterized protein OS=Sus scrofa OX=9823 PE=4 SV=1	34590	8	8	9	11	0	3	18	0	4	7	3	0	0	0
A0A287BR34|A0A287BR34_PIG	Kinesin-like protein OS=Sus scrofa OX=9823 GN=KIF9 PE=3 SV=1	90030	9	9	4	4	20	4	10	1	2	3	0	0	0	0
F1RIY9|F1RIY9_PIG	Protein kinase cAMP-dependent type I regulatory subunit beta OS=Sus scrofa OX=9823 GN=PRKAR1B PE=4 SV=3	43069	12	10	8	9	11	9	9	1	3	2	0	0	0	0
A0A287AFZ3|A0A287AFZ3_PIG	Protein kinase cAMP-dependent type I regulatory subunit beta OS=Sus scrofa OX=9823 GN=PRKAR1B PE=4 SV=1	45931	12	10	8	0	0	9	0	0	3	0	0	0	0	0
F1S232|F1S232_PIG	4-trimethylaminobutyraldehyde dehydrogenase OS=Sus scrofa OX=9823 GN=ALDH9A1 PE=1 SV=3	64727	12	12	0	0	0	0	0	0	0	0	0	15	0	0
A0A286ZNV5|A0A286ZNV5_PIG	4-trimethylaminobutyraldehyde dehydrogenase OS=Sus scrofa OX=9823 GN=ALDH9A1 PE=1 SV=1	53941	12	12	0	1	8	0	1	0	0	1	0	15	27	0
I3LCP8|I3LCP8_PIG	Serpin family B member 6 OS=Sus scrofa OX=9823 GN=SERPINB6 PE=1 SV=2	42869	11	10	4	6	18	2	5	5	1	3	2	1	7	1
F1SGU6|F1SGU6_PIG	H1 histone family member N testis specific OS=Sus scrofa OX=9823 GN=H1FNT PE=4 SV=3	31079	12	12	3	3	0	0	1	0	3	2	0	0	0	0
A0A287AE72|A0A287AE72_PIG	Uncharacterized protein OS=Sus scrofa OX=9823 GN=TEX101 PE=1 SV=1	27369	7	7	3	2	7	3	3	1	3	4	0	2	2	2
F1RMW6|F1RMW6_PIG	Uncharacterized protein OS=Sus scrofa OX=9823 GN=TEX101 PE=1 SV=2	26757	7	7	3	0	7	3	0	1	3	0	0	2	0	2
A0A287B283|A0A287B283_PIG	LanC like 1 OS=Sus scrofa OX=9823 GN=LANCL1 PE=1 SV=1	45384	9	9	12	0	9	2	0	5	0	0	2	1	0	0
A0A286ZXU8|A0A286ZXU8_PIG	LanC like 1 OS=Sus scrofa OX=9823 GN=LANCL1 PE=1 SV=1	45515	9	9	12	21	9	2	14	5	0	8	2	1	10	0
D5K8A3|D5K8A3_PIG	Spermatogenesis associated 24 OS=Sus scrofa OX=9823 GN=SPATA24 PE=2 SV=1	23682	8	2	8	6	2	3	5	2	2	7	3	0	0	0
B2MUB6|B2MUB6_PIG	Small calcium-binding mitochondrial carrier 1 OS=Sus scrofa OX=9823 GN=SCAMC-1 PE=1 SV=1	53265	10	10	0	0	0	0	0	0	0	0	0	15	20	0
F6Q4L6|F6Q4L6_PIG	Uncharacterized protein OS=Sus scrofa OX=9823 GN=SLC25A24 PE=1 SV=2	37640	10	10	0	0	0	0	0	0	0	0	0	15	0	0
A0A287AAR6|A0A287AAR6_PIG	Uncharacterized protein OS=Sus scrofa OX=9823 GN=LOC102164346 PE=4 SV=1	125097	12	12	10	13	1	8	17	7	5	1	1	0	0	0
A0A287B6G0|A0A287B6G0_PIG	Uncharacterized protein OS=Sus scrofa OX=9823 GN=LOC102164346 PE=4 SV=1	143060	12	12	10	0	1	8	0	7	5	0	1	0	0	0
F1SPT2|F1SPT2_PIG	Chromosome 3 open reading frame 84 OS=Sus scrofa OX=9823 GN=C3orf84 PE=4 SV=3	23302	10	10	3	2	12	15	14	16	9	9	1	0	0	0
F1SQP4|F1SQP4_PIG	NADH dehydrogenase [ubiquinone] 1 alpha subcomplex subunit 12 OS=Sus scrofa OX=9823 GN=NDUFA12 PE=1 SV=2	17136	7	7	0	0	19	7	3	11	10	7	1	0	2	0
I3LKN8|I3LKN8_PIG	NLR family pyrin domain containing 13 OS=Sus scrofa OX=9823 GN=NLRP13 PE=4 SV=2	115749	14	14	0	0	0	0	0	0	0	0	0	16	21	0
A0A287AAW4|A0A287AAW4_PIG	Uncharacterized protein OS=Sus scrofa OX=9823 PE=4 SV=1	8088	6	6	8	7	6	10	3	9	10	8	9	0	2	0
A0A287ASY8|A0A287ASY8_PIG	NADPH:adrenodoxin oxidoreductase mitochondrial OS=Sus scrofa OX=9823 GN=FDXR PE=1 SV=1	56104	14	14	2	0	4	0	0	0	0	0	0	10	0	2
F1RV70|F1RV70_PIG	NADPH:adrenodoxin oxidoreductase mitochondrial OS=Sus scrofa OX=9823 GN=FDXR PE=1 SV=1	54193	14	14	2	2	4	0	2	0	0	0	0	10	11	2
A0A287AQR4|A0A287AQR4_PIG	Importin 9 OS=Sus scrofa OX=9823 GN=IPO9 PE=1 SV=1	119595	8	8	5	0	0	7	0	0	4	0	0	0	0	0
A0A287A765|A0A287A765_PIG	Importin 9 OS=Sus scrofa OX=9823 GN=IPO9 PE=1 SV=1	115235	8	8	5	0	0	7	0	0	4	0	0	0	0	0
A0A286ZP63|A0A286ZP63_PIG	Importin 9 OS=Sus scrofa OX=9823 GN=IPO9 PE=1 SV=1	112171	8	8	5	7	0	7	3	0	4	3	0	0	3	0
A0A0B8RZ32|A0A0B8RZ32_PIG	Stress-induced phosphoprotein 1 OS=Sus scrofa domesticus OX=9825 GN=STIP1 PE=4 SV=1	62463	10	10	0	12	0	0	8	0	0	0	0	11	37	7
A0A287AMV5|A0A287AMV5_PIG	Polyribonucleotide nucleotidyltransferase 1 OS=Sus scrofa OX=9823 GN=PNPT1 PE=1 SV=1	86011	12	12	0	0	0	0	0	0	0	0	0	15	12	0
F1RZL9|F1RZL9_PIG	Uncharacterized protein OS=Sus scrofa OX=9823 GN=LOC100049687 PE=4 SV=3	82643	8	8	12	0	16	0	0	8	0	0	0	0	0	0
I3LHV1|I3LHV1_PIG	Uncharacterized protein OS=Sus scrofa OX=9823 GN=LOC100049687 PE=4 SV=2	83533	8	8	12	0	16	0	0	8	0	0	0	0	0	0
A5HJZ3|A5HJZ3_PIG	ADAM3b OS=Sus scrofa OX=9823 PE=2 SV=1	83583	8	8	12	0	16	0	0	8	0	0	0	0	0	0
A0A287AF66|A0A287AF66_PIG	Listerin E3 ubiquitin protein ligase 1 OS=Sus scrofa OX=9823 GN=LTN1 PE=1 SV=1	178625	10	10	5	0	0	8	0	0	3	0	0	0	0	0
I3L9S9|I3L9S9_PIG	Listerin E3 ubiquitin protein ligase 1 OS=Sus scrofa OX=9823 GN=LTN1 PE=1 SV=1	200511	10	10	5	0	0	8	0	0	3	0	0	0	0	0
A0A286ZIB3|A0A286ZIB3_PIG	Listerin E3 ubiquitin protein ligase 1 OS=Sus scrofa OX=9823 GN=LTN1 PE=1 SV=1	209270	10	10	5	3	0	8	6	0	3	2	0	0	0	0
F1SKB1|F1SKB1_PIG	Ceruloplasmin OS=Sus scrofa OX=9823 GN=CP PE=1 SV=4	123853	9	2	3	0	0	10	0	0	2	0	0	2	0	0
K7GMZ8|K7GMZ8_PIG	Ceruloplasmin OS=Sus scrofa OX=9823 GN=CP PE=1 SV=2	121858	9	2	3	0	0	10	0	0	2	0	0	2	0	0
F1S031|F1S031_PIG	NADH dehydrogenase [ubiquinone] iron-sulfur protein 6 mitochondrial OS=Sus scrofa OX=9823 GN=NDUFS6 PE=1 SV=1	13329	9	9	1	0	20	7	5	16	4	0	0	1	1	1
F1RXT6|F1RXT6_PIG	Outer dense fiber of sperm tails 3B OS=Sus scrofa OX=9823 GN=ODF3B PE=4 SV=1	27382	8	8	3	2	17	2	3	0	1	7	0	0	0	0
F1SSQ5|F1SSQ5_PIG	Uncharacterized protein OS=Sus scrofa OX=9823 GN=SPAG16 PE=4 SV=3	33271	5	5	4	0	9	2	6	0	6	0	0	0	0	0
I3LG10|I3LG10_PIG	Uncharacterized protein OS=Sus scrofa OX=9823 PE=4 SV=2	24146	8	8	0	0	0	0	0	0	2	0	0	13	10	0
C4MXZ1|C4MXZ1_PIG	ADP-ribosylation factor 1 OS=Sus scrofa OX=9823 GN=ARF1 PE=1 SV=1	20697	11	8	2	8	1	4	7	1	0	7	2	10	16	0
A0A287B5T6|A0A287B5T6_PIG	Uncharacterized protein OS=Sus scrofa OX=9823 GN=ARF3 PE=3 SV=1	20601	11	8	2	0	1	4	0	1	0	0	2	10	0	0
sp|P79274|ACADL_PIG	Long-chain specific acyl-CoA dehydrogenase mitochondrial OS=Sus scrofa OX=9823 GN=ACADL PE=2 SV=1	47957	9	9	0	2	16	0	1	0	0	0	0	8	12	2
I3LT29|I3LT29_PIG	IQ motif containing with AAA domain 1 like OS=Sus scrofa OX=9823 GN=IQCA1L PE=4 SV=2	95045	9	8	0	0	5	8	0	8	10	0	4	0	0	0
A0A287AR07|A0A287AR07_PIG	IQ motif containing with AAA domain 1 like OS=Sus scrofa OX=9823 GN=IQCA1L PE=4 SV=1	91920	9	8	0	0	5	8	2	8	10	7	4	0	0	0
F1SAZ0|F1SAZ0_PIG	Sperm associated antigen 17 OS=Sus scrofa OX=9823 GN=SPAG17 PE=4 SV=3	240877	12	12	5	4	12	0	2	0	0	0	0	0	0	0
A0A287BEC7|A0A287BEC7_PIG	Vesicle associated membrane protein 3 OS=Sus scrofa OX=9823 GN=VAMP3 PE=1 SV=1	15264	9	9	0	2	4	3	2	0	7	2	1	2	1	0
F1RSY4|F1RSY4_PIG	Sphingomyelin phosphodiesterase 2 OS=Sus scrofa OX=9823 GN=SMPD2 PE=1 SV=2	47573	10	10	8	10	0	6	7	0	2	3	0	0	0	0
A8U4R4|A8U4R4_PIG	Transketolase OS=Sus scrofa OX=9823 GN=tkt PE=1 SV=1	67838	11	11	0	2	0	0	3	0	0	1	0	13	37	0
F1S814|F1S814_PIG	Phosphoglucomutase 1 OS=Sus scrofa OX=9823 GN=PGM1 PE=1 SV=3	61534	11	11	3	0	19	1	0	0	0	0	0	2	6	0
A0A287A9L8|A0A287A9L8_PIG	2' 3'-cyclic-nucleotide 3'-phosphodiesterase OS=Sus scrofa OX=9823 GN=CNP PE=1 SV=1	47069	7	7	0	0	0	0	0	0	0	0	0	7	0	0
A0A287BD93|A0A287BD93_PIG	2' 3'-cyclic-nucleotide 3'-phosphodiesterase OS=Sus scrofa OX=9823 GN=CNP PE=1 SV=1	47200	7	7	0	0	0	0	0	0	0	0	0	7	0	0
F1RMR6|F1RMR6_PIG	HSPA (Hsp70) binding protein 1 OS=Sus scrofa OX=9823 GN=HSPBP1 PE=1 SV=2	39113	7	7	8	10	4	3	5	3	3	8	1	0	5	0
A0A287A5U7|A0A287A5U7_PIG	HSPA (Hsp70) binding protein 1 OS=Sus scrofa OX=9823 GN=HSPBP1 PE=1 SV=1	34656	7	7	8	0	4	3	0	3	3	0	1	0	0	0
Q2XQY5|Q2XQY5_PIG	Tropomyosin 3 OS=Sus scrofa OX=9823 GN=tpm3 PE=2 SV=1	28921	10	4	0	0	5	0	0	0	0	0	0	8	0	10
Q6QA25|Q6QA25_PIG	Tropomyosin 3 OS=Sus scrofa OX=9823 GN=TPM3 PE=2 SV=1	29033	10	4	0	2	5	0	1	0	0	0	0	8	12	10
F1RGK5|F1RGK5_PIG	Tropomyosin alpha-3 chain OS=Sus scrofa OX=9823 GN=TPM3 PE=1 SV=3	29358	10	4	0	0	0	0	0	0	0	0	0	8	0	0
A0A0B8RZ16|A0A0B8RZ16_PIG	Tropomyosin 3 OS=Sus scrofa domesticus OX=9825 GN=TPM3 PE=3 SV=1	28922	10	4	0	0	5	0	0	0	0	0	0	8	0	10
A0A288CFY3|A0A288CFY3_PIG	Tropomyosin alpha-3 chain OS=Sus scrofa OX=9823 GN=TPM3 PE=1 SV=1	28922	10	4	0	0	5	0	0	0	0	0	0	8	0	10
sp|P11708|MDHC_PIG	Malate dehydrogenase cytoplasmic OS=Sus scrofa OX=9823 GN=MDH1 PE=1 SV=4	36454	7	7	2	2	14	0	0	0	0	0	0	4	3	0
K7GLF7|K7GLF7_PIG	Transglutaminase 1 OS=Sus scrofa OX=9823 GN=TGM1 PE=4 SV=1	90879	7	7	1	0	0	0	0	0	0	0	0	9	4	0
F1RG16|F1RG16_PIG	Uncharacterized protein OS=Sus scrofa OX=9823 GN=HNRNPF PE=1 SV=1	45670	7	6	4	0	0	4	0	0	0	0	0	1	0	0
A0A287A9H4|A0A287A9H4_PIG	Uncharacterized protein OS=Sus scrofa OX=9823 GN=HNRNPF PE=1 SV=1	42478	7	6	4	17	0	4	24	0	0	8	0	1	8	0
I7HD36|I7HD36_PIG	Sodium/potassium-transporting ATPase subunit alpha (Fragment) OS=Sus scrofa OX=9823 GN=atp1a1 PE=2 SV=1	112624	9	7	1	0	0	2	0	0	0	0	0	1	0	0
D2WKD6|D2WKD6_PIG	Sodium/potassium-transporting ATPase subunit alpha OS=Sus scrofa OX=9823 GN=ATP1A1 PE=1 SV=1	112755	9	7	1	0	0	2	0	0	0	0	0	1	0	0
F1SAX3|F1SAX3_PIG	Sodium/potassium-transporting ATPase subunit alpha OS=Sus scrofa OX=9823 GN=ATP1A1 PE=1 SV=3	113678	9	7	1	2	0	2	0	0	0	0	0	1	9	0
sp|P05024|AT1A1_PIG	Sodium/potassium-transporting ATPase subunit alpha-1 OS=Sus scrofa OX=9823 GN=ATP1A1 PE=1 SV=1	112681	9	7	1	0	0	2	0	0	0	0	0	1	0	0
A0A286ZVL0|A0A286ZVL0_PIG	Heterogeneous nuclear ribonucleoprotein U OS=Sus scrofa OX=9823 GN=HNRNPU PE=1 SV=1	90666	7	7	4	0	0	4	0	0	4	0	0	0	0	0
A0A286ZJR3|A0A286ZJR3_PIG	Heterogeneous nuclear ribonucleoprotein U OS=Sus scrofa OX=9823 GN=HNRNPU PE=1 SV=1	77187	7	7	4	17	0	4	12	0	4	13	0	0	1	0
A0A286ZP67|A0A286ZP67_PIG	Heterogeneous nuclear ribonucleoprotein U OS=Sus scrofa OX=9823 GN=HNRNPU PE=1 SV=1	89061	7	7	4	0	0	4	0	0	4	0	0	0	0	0
F1S8L9|F1S8L9_PIG	Heterogeneous nuclear ribonucleoprotein U OS=Sus scrofa OX=9823 GN=HNRNPU PE=1 SV=3	88413	7	7	4	0	0	4	0	0	4	0	0	0	0	0
sp|Q45FY6|HPRT_PIG	Hypoxanthine-guanine phosphoribosyltransferase OS=Sus scrofa OX=9823 GN=HPRT1 PE=2 SV=3	24555	12	12	1	2	5	2	2	3	0	1	0	14	20	0
B0LXK8|B0LXK8_PIG	Hypoxanthine phosphoribosyltransferase OS=Sus scrofa OX=9823 GN=HPRT1 PE=3 SV=1	24555	12	12	1	0	5	2	0	3	0	0	0	14	0	0
I3LCU9|I3LCU9_PIG	Calcium regulated heat stable protein 1 OS=Sus scrofa OX=9823 GN=CARHSP1 PE=1 SV=2	15786	8	8	10	7	3	4	3	1	1	2	3	0	1	0
A0A287B356|A0A287B356_PIG	Eukaryotic translation initiation factor 5A OS=Sus scrofa OX=9823 GN=EIF5A PE=1 SV=1	16832	8	8	6	19	3	2	9	10	4	8	4	3	1	1
A0A287B3T4|A0A287B3T4_PIG	Theg spermatid protein OS=Sus scrofa OX=9823 GN=THEG PE=4 SV=1	42989	9	9	8	0	18	4	0	2	3	0	5	0	0	0
F1S5Q9|F1S5Q9_PIG	Theg spermatid protein OS=Sus scrofa OX=9823 GN=THEG PE=4 SV=3	43616	9	9	8	9	18	4	6	2	3	5	5	0	0	0
A0A286ZJT2|A0A286ZJT2_PIG	Spermatogenesis associated 24 OS=Sus scrofa OX=9823 GN=SPATA24 PE=4 SV=1	18334	7	1	7	6	0	2	5	0	3	4	0	0	0	0
F1SNE3|F1SNE3_PIG	Centlein OS=Sus scrofa OX=9823 GN=CNTLN PE=4 SV=3	154343	9	9	8	6	1	3	6	1	1	3	1	0	0	1
A0A287BPV4|A0A287BPV4_PIG	Centlein OS=Sus scrofa OX=9823 GN=CNTLN PE=4 SV=1	161857	9	9	8	0	1	3	0	1	1	0	1	0	0	1
A0A287A260|A0A287A260_PIG	Chromosome 17 open reading frame 98 OS=Sus scrofa OX=9823 GN=C17orf98 PE=4 SV=1	17830	7	7	7	3	6	2	3	5	2	2	3	0	0	0
F1SR05|F1SR05_PIG	L-lactate dehydrogenase OS=Sus scrofa OX=9823 GN=LDHB PE=3 SV=3	41416	9	3	2	1	4	12	8	6	8	5	9	4	6	1
A0A287B094|A0A287B094_PIG	L-lactate dehydrogenase OS=Sus scrofa OX=9823 GN=LDHB PE=3 SV=1	36738	9	3	2	0	0	12	0	0	8	0	0	4	0	0
sp|P00336|LDHB_PIG	L-lactate dehydrogenase B chain OS=Sus scrofa OX=9823 GN=LDHB PE=1 SV=3	36612	9	3	2	0	4	12	0	6	8	0	9	4	0	1
A0A287BCT2|A0A287BCT2_PIG	Acyl-CoA thioesterase 4 OS=Sus scrofa OX=9823 GN=ACOT4 PE=1 SV=1	55153	6	6	0	0	8	0	0	0	0	0	0	1	0	3
A0A287B5Z7|A0A287B5Z7_PIG	Acyl-CoA thioesterase 4 OS=Sus scrofa OX=9823 GN=ACOT4 PE=1 SV=1	55048	6	6	0	0	8	0	0	0	0	0	0	1	0	3
F1SQM3|F1SQM3_PIG	Chromosome 2 open reading frame 74 OS=Sus scrofa OX=9823 GN=C2orf74 PE=4 SV=2	13326	12	12	12	6	2	4	3	2	2	2	2	1	0	0
A0A287ACK8|A0A287ACK8_PIG	Erythrocyte membrane protein band 4.1 like 2 OS=Sus scrofa OX=9823 GN=EPB41L2 PE=1 SV=1	115654	9	9	0	0	0	0	0	0	0	0	0	12	7	0
A0A287BFZ2|A0A287BFZ2_PIG	Erythrocyte membrane protein band 4.1 like 2 OS=Sus scrofa OX=9823 GN=EPB41L2 PE=1 SV=1	116676	9	9	0	0	0	0	0	0	0	0	0	12	0	0
A0A287BIL4|A0A287BIL4_PIG	Erythrocyte membrane protein band 4.1 like 2 OS=Sus scrofa OX=9823 GN=EPB41L2 PE=1 SV=1	108448	9	9	0	0	0	0	0	0	0	0	0	12	0	0
I3LUL5|I3LUL5_PIG	Erythrocyte membrane protein band 4.1 like 2 OS=Sus scrofa OX=9823 GN=EPB41L2 PE=1 SV=2	110411	9	9	0	0	0	0	0	0	0	0	0	12	0	0
A0A287BAF7|A0A287BAF7_PIG	Erythrocyte membrane protein band 4.1 like 2 OS=Sus scrofa OX=9823 GN=EPB41L2 PE=1 SV=1	112740	9	9	0	0	0	0	0	0	0	0	0	12	0	0
F1S3M9|F1S3M9_PIG	Erythrocyte membrane protein band 4.1 like 2 OS=Sus scrofa OX=9823 GN=EPB41L2 PE=1 SV=3	110985	9	9	0	0	0	0	0	0	0	0	0	12	0	0
A0A287BNA1|A0A287BNA1_PIG	Erythrocyte membrane protein band 4.1 like 2 OS=Sus scrofa OX=9823 GN=EPB41L2 PE=1 SV=1	108515	9	9	0	0	0	0	0	0	0	0	0	12	0	0
A0A287ASJ1|A0A287ASJ1_PIG	Erythrocyte membrane protein band 4.1 like 2 OS=Sus scrofa OX=9823 GN=EPB41L2 PE=1 SV=1	102757	9	9	0	0	0	0	0	0	0	0	0	12	0	0
C1KBY9|C1KBY9_PIG	Bactericidal/permeability increasing protein OS=Sus scrofa OX=9823 PE=2 SV=1	53364	9	9	0	0	0	8	0	0	6	0	0	0	1	0
A0A287BLV6|A0A287BLV6_PIG	Bactericidal permeability increasing protein OS=Sus scrofa OX=9823 GN=BPI PE=1 SV=1	53251	9	9	0	0	0	8	0	0	6	0	0	0	0	0
C7C1I8|C7C1I8_PIG	WAP four-disulfide core domain 10A-like (Fragment) OS=Sus scrofa OX=9823 GN=WFDC10AL PE=2 SV=1	11726	8	8	51	16	11	6	10	0	2	5	0	1	1	0
A0A287AEV7|A0A287AEV7_PIG	Uncharacterized protein OS=Sus scrofa OX=9823 GN=WFDC10AL PE=1 SV=1	11986	8	8	51	0	11	6	0	0	2	0	0	1	0	0
F1SEJ6|F1SEJ6_PIG	Family with sequence similarity 170 member B OS=Sus scrofa OX=9823 GN=FAM170B PE=4 SV=2	32152	10	10	15	12	2	6	19	7	2	5	5	0	0	0
F1SUB4|F1SUB4_PIG	Thymus brain and testes associated OS=Sus scrofa OX=9823 GN=TBATA PE=4 SV=3	38489	8	8	0	6	1	14	1	2	11	10	3	0	0	2
A0A287BL05|A0A287BL05_PIG	Heterogeneous nuclear ribonucleoprotein H1 OS=Sus scrofa OX=9823 GN=HNRNPH1 PE=1 SV=1	51221	7	6	5	16	0	5	20	0	4	11	0	1	3	0
A0A286ZQN9|A0A286ZQN9_PIG	Heterogeneous nuclear ribonucleoprotein H1 OS=Sus scrofa OX=9823 GN=HNRNPH1 PE=1 SV=1	49229	7	6	5	0	0	5	0	0	4	0	0	1	0	0
A0A286ZRL1|A0A286ZRL1_PIG	ATP-dependent Clp protease proteolytic subunit OS=Sus scrofa OX=9823 GN=CLPP PE=1 SV=1	29826	13	13	0	0	2	0	0	0	0	0	0	12	0	2
sp|A1E295|CATB_PIG	Cathepsin B OS=Sus scrofa OX=9823 GN=CTSB PE=1 SV=1	36901	10	10	2	0	0	3	0	0	1	0	0	8	0	12
A0A287BF94|A0A287BF94_PIG	Cathepsin B OS=Sus scrofa OX=9823 GN=CTSB PE=1 SV=1	40511	10	10	2	4	0	3	9	0	1	6	0	8	16	12
Q2EN80|Q2EN80_PIG	NADH dehydrogenase 1 beta subcomplex 6 OS=Sus scrofa OX=9823 GN=NDUFB6 PE=1 SV=1	15577	8	8	0	0	3	9	0	3	13	5	3	1	1	0
F1SGC6|F1SGC6_PIG	Uncharacterized protein OS=Sus scrofa OX=9823 GN=NDUFB5 PE=1 SV=1	21554	8	8	0	0	7	4	3	2	11	6	3	2	1	0
sp|Q710C4|SAHH_PIG	Adenosylhomocysteinase OS=Sus scrofa OX=9823 GN=AHCY PE=3 SV=3	47694	9	9	0	0	12	0	0	0	0	0	0	8	9	1
A0A287B4J2|A0A287B4J2_PIG	Adenosylhomocysteinase OS=Sus scrofa OX=9823 GN=AHCY PE=3 SV=1	52680	9	9	0	0	12	0	0	0	0	0	0	8	0	1
D0G0C3|D0G0C3_PIG	Adenosylhomocysteinase OS=Sus scrofa OX=9823 GN=AHCY PE=2 SV=1	47724	9	9	0	0	12	0	0	0	0	0	0	8	0	1
A0A287BQ35|A0A287BQ35_PIG	Alpha-L-fucosidase OS=Sus scrofa OX=9823 GN=FUCA1 PE=1 SV=1	51787	11	11	1	0	18	1	0	1	0	1	0	4	6	3
I3LNS9|I3LNS9_PIG	Alpha-L-fucosidase OS=Sus scrofa OX=9823 GN=FUCA1 PE=1 SV=2	54047	11	11	1	0	18	1	0	1	0	0	0	4	0	3
F1SJV8|F1SJV8_PIG	RNA exonuclease 2 OS=Sus scrofa OX=9823 GN=REXO2 PE=1 SV=3	26901	10	10	0	0	3	0	0	0	0	0	0	13	5	5
A0A287BTG4|A0A287BTG4_PIG	Myosin IB OS=Sus scrofa OX=9823 GN=MYO1B PE=1 SV=1	124938	8	8	2	0	0	1	0	0	2	0	0	2	0	0
A0A287AR16|A0A287AR16_PIG	Myosin IB OS=Sus scrofa OX=9823 GN=MYO1B PE=1 SV=1	128468	8	8	2	0	0	1	0	0	2	0	0	2	0	0
A0A287AIF2|A0A287AIF2_PIG	Myosin IB OS=Sus scrofa OX=9823 GN=MYO1B PE=1 SV=1	128314	8	8	2	0	0	1	0	0	2	0	0	2	0	0
A0A287BFH0|A0A287BFH0_PIG	Myosin IB OS=Sus scrofa OX=9823 GN=MYO1B PE=1 SV=1	131845	8	8	2	0	0	1	0	0	2	0	0	2	0	0
A0A287A7R5|A0A287A7R5_PIG	IQ motif containing GTPase activating protein 1 OS=Sus scrofa OX=9823 GN=IQGAP1 PE=1 SV=1	195286	9	9	1	13	0	1	5	0	3	0	0	1	5	0
F1RMJ4|F1RMJ4_PIG	IQ motif containing GTPase activating protein 1 OS=Sus scrofa OX=9823 GN=IQGAP1 PE=1 SV=3	189247	9	9	1	0	0	1	0	0	3	0	0	1	0	0
A0A287BQB3|A0A287BQB3_PIG	Uncharacterized protein OS=Sus scrofa OX=9823 PE=4 SV=1	17252	9	9	2	8	8	2	5	7	2	10	4	0	0	0
F1SFQ4|F1SFQ4_PIG	Poly(rC) binding protein 2 OS=Sus scrofa OX=9823 GN=PCBP2 PE=1 SV=2	37231	9	7	6	0	0	5	0	0	3	0	0	5	0	0
sp|P63246|RACK1_PIG	Receptor of activated protein C kinase 1 OS=Sus scrofa OX=9823 GN=RACK1 PE=1 SV=3	35077	8	8	6	7	2	5	7	7	0	3	5	2	1	0
A0A287ANV7|A0A287ANV7_PIG	Lymphocyte cytosolic protein 1 OS=Sus scrofa OX=9823 GN=LCP1 PE=1 SV=1	71287	7	4	1	2	0	2	1	0	1	1	0	1	2	0
F1RK02|F1RK02_PIG	Lymphocyte cytosolic protein 1 OS=Sus scrofa OX=9823 GN=LCP1 PE=1 SV=3	70204	7	4	1	0	0	2	0	0	1	0	0	1	0	0
sp|Q8MJ30|DHPR_PIG	Dihydropteridine reductase OS=Sus scrofa OX=9823 GN=QDPR PE=2 SV=1	25758	7	7	3	4	0	1	3	0	1	0	0	5	7	0
A0A0B8RZJ8|A0A0B8RZJ8_PIG	Guanine nucleotide binding protein (G protein) beta polypeptide 1 OS=Sus scrofa domesticus OX=9825 GN=GNB1 PE=4 SV=1	37377	8	7	1	3	0	3	3	0	3	3	0	5	6	0
I3LSK5|I3LSK5_PIG	G protein subunit beta 1 OS=Sus scrofa OX=9823 GN=GNB1 PE=4 SV=2	37377	8	7	1	0	0	3	0	0	3	0	0	5	0	0
A0A1B2TT62|A0A1B2TT62_PIG	DAZ-associated protein 1 isoform 2 OS=Sus scrofa OX=9823 GN=DAZAP1 PE=2 SV=1	43123	11	11	6	17	4	2	10	7	3	6	6	0	0	0
I3LB68|I3LB68_PIG	DAZ associated protein 1 OS=Sus scrofa OX=9823 GN=DAZAP1 PE=1 SV=1	43326	11	11	6	0	4	2	0	7	3	0	6	0	0	0
A0A286ZID6|A0A286ZID6_PIG	DAZ associated protein 1 OS=Sus scrofa OX=9823 GN=DAZAP1 PE=1 SV=1	40692	11	11	6	0	4	2	0	7	3	0	6	0	0	0
A0A287BHQ2|A0A287BHQ2_PIG	Uncharacterized protein OS=Sus scrofa OX=9823 GN=HMGB3 PE=4 SV=1	23112	11	11	8	8	0	5	0	0	6	7	0	0	4	0
A0A286ZWP6|A0A286ZWP6_PIG	Uncharacterized protein OS=Sus scrofa OX=9823 GN=DNAJB6 PE=1 SV=1	36218	9	6	7	4	0	1	5	0	2	3	0	0	0	0
D0G0C6|D0G0C6_PIG	Asparagine synthetase OS=Sus scrofa OX=9823 GN=ASNS PE=2 SV=1	64374	8	8	0	0	0	0	0	0	0	0	0	12	30	0
A0A287BM14|A0A287BM14_PIG	Uncharacterized protein OS=Sus scrofa OX=9823 PE=4 SV=1	29250	9	2	4	0	2	3	0	3	9	0	1	0	0	0
A0A286ZPJ0|A0A286ZPJ0_PIG	Uncharacterized protein OS=Sus scrofa OX=9823 PE=4 SV=1	29367	9	2	4	0	2	3	0	3	9	0	1	0	0	0
sp|Q2EN76|NDKB_PIG	Nucleoside diphosphate kinase B OS=Sus scrofa OX=9823 GN=NME2 PE=2 SV=1	17176	7	5	5	6	19	3	2	5	0	2	6	5	13	0
F1SU59|F1SU59_PIG	Annexin OS=Sus scrofa OX=9823 GN=ANXA7 PE=1 SV=3	49542	10	10	0	0	0	0	0	0	0	0	0	10	12	0
I3LEY2|I3LEY2_PIG	Annexin OS=Sus scrofa OX=9823 GN=ANXA7 PE=1 SV=2	51976	10	10	0	0	0	0	0	0	0	0	0	10	0	0
Q06AS8|Q06AS8_PIG	G protein subunit alpha i3 OS=Sus scrofa OX=9823 GN=GNAI3 PE=1 SV=1	40546	9	5	1	1	0	1	2	0	1	1	0	9	8	0
V5PZU4|V5PZU4_PIG	Testis-specific serine kinase 4 isoform 1 OS=Sus scrofa OX=9823 GN=TSSK4 PE=2 SV=1	37416	7	7	5	0	11	7	0	7	2	0	2	0	0	1
I3LBD3|I3LBD3_PIG	Testis specific serine kinase 4 OS=Sus scrofa OX=9823 GN=TSSK4 PE=4 SV=2	37972	7	7	5	9	11	7	9	7	2	4	2	0	0	1
A0A287APJ0|A0A287APJ0_PIG	NudC domain containing 2 OS=Sus scrofa OX=9823 GN=NUDCD2 PE=1 SV=1	17646	8	8	9	5	0	8	3	0	5	1	0	0	0	0
F1RMV5|F1RMV5_PIG	ETHE1 persulfide dioxygenase OS=Sus scrofa OX=9823 GN=ETHE1 PE=1 SV=2	27024	13	13	5	1	0	3	1	1	1	3	0	12	10	0
F1RWJ5|F1RWJ5_PIG	Importin subunit beta-1 OS=Sus scrofa OX=9823 GN=KPNB1 PE=1 SV=3	97225	10	10	1	17	0	1	2	0	0	3	0	6	15	0
A0A076EBZ3|A0A076EBZ3_PIG	NADH-ubiquinone oxidoreductase chain 5 OS=Sus scrofa domesticus OX=9825 GN=ND5 PE=3 SV=1	68636	6	6	0	0	3	2	0	3	4	0	1	0	0	0
W8ELH7|W8ELH7_PIG	NADH-ubiquinone oxidoreductase chain 5 OS=Sus scrofa domesticus OX=9825 GN=ND5 PE=3 SV=1	68702	6	6	0	0	3	2	0	3	4	0	1	0	0	0
A0A1W6CGD9|A0A1W6CGD9_PIG	NADH-ubiquinone oxidoreductase chain 5 OS=Sus scrofa OX=9823 GN=ND5 PE=3 SV=1	68718	6	6	0	0	3	2	0	3	4	0	1	0	0	0
Q1WF01|Q1WF01_PIG	NADH-ubiquinone oxidoreductase chain 5 OS=Sus scrofa OX=9823 GN=ND5 PE=3 SV=1	68720	6	6	0	0	3	2	0	3	4	0	1	0	0	0
W5QT73|W5QT73_PIG	NADH-ubiquinone oxidoreductase chain 5 OS=Sus scrofa OX=9823 GN=ND5 PE=3 SV=1	68704	6	6	0	0	3	2	0	3	4	0	1	0	0	0
A0A1W6CFP7|A0A1W6CFP7_PIG	NADH-ubiquinone oxidoreductase chain 5 OS=Sus scrofa OX=9823 GN=ND5 PE=3 SV=1	68718	6	6	0	0	0	2	0	0	4	0	0	0	0	0
M4MCE5|M4MCE5_PIG	NADH-ubiquinone oxidoreductase chain 5 OS=Sus scrofa domesticus OX=9825 GN=ND5 PE=3 SV=1	68658	6	6	0	0	3	2	0	3	4	0	1	0	0	0
A0A1D8DAL4|A0A1D8DAL4_PIG	NADH-ubiquinone oxidoreductase chain 5 OS=Sus scrofa OX=9823 GN=ND5 PE=3 SV=1	68703	6	6	0	0	3	2	0	3	4	0	1	0	0	0
A0A076ED92|A0A076ED92_PIG	NADH-ubiquinone oxidoreductase chain 5 OS=Sus scrofa domesticus OX=9825 GN=ND5 PE=3 SV=1	68697	6	6	0	0	3	2	0	3	4	0	1	0	0	0
U5N2C4|U5N2C4_PIG	NADH-ubiquinone oxidoreductase chain 5 OS=Sus scrofa OX=9823 GN=ND5 PE=3 SV=1	68658	6	6	0	0	3	2	0	3	4	0	1	0	0	0
W8EFV5|W8EFV5_PIG	NADH-ubiquinone oxidoreductase chain 5 OS=Sus scrofa OX=9823 GN=ND5 PE=3 SV=1	68678	6	6	0	0	3	2	0	3	4	0	1	0	0	0
A0A343RP39|A0A343RP39_PIG	NADH-ubiquinone oxidoreductase chain 5 OS=Sus scrofa OX=9823 GN=ND5 PE=3 SV=1	68654	6	6	0	0	3	2	0	3	4	0	1	0	0	0
Q9G7R8|Q9G7R8_PIG	NADH-ubiquinone oxidoreductase chain 5 OS=Sus scrofa OX=9823 GN=NADH5 PE=3 SV=1	68652	6	6	0	0	3	2	0	3	4	0	1	0	0	0
C7FE66|C7FE66_PIG	NADH-ubiquinone oxidoreductase chain 5 OS=Sus scrofa OX=9823 GN=ND5 PE=3 SV=1	68722	6	6	0	0	0	2	0	0	4	0	0	0	0	0
A9LGF9|A9LGF9_PIG	NADH-ubiquinone oxidoreductase chain 5 OS=Sus scrofa OX=9823 GN=ND5 PE=3 SV=1	68662	6	6	0	0	3	2	0	3	4	0	1	0	0	0
A0A1W6CGD2|A0A1W6CGD2_PIG	NADH-ubiquinone oxidoreductase chain 5 OS=Sus scrofa OX=9823 GN=ND5 PE=3 SV=1	68690	6	6	0	0	3	2	0	3	4	0	1	0	0	0
A0A343EQW4|A0A343EQW4_PIG	NADH-ubiquinone oxidoreductase chain 5 OS=Sus scrofa OX=9823 GN=ND5 PE=3 SV=1	68660	6	6	0	0	3	2	0	3	4	0	1	0	0	0
E3T1W5|E3T1W5_PIG	NADH-ubiquinone oxidoreductase chain 5 OS=Sus scrofa taivanus OX=310261 GN=ND5 PE=3 SV=1	68719	6	6	0	0	3	2	0	3	4	0	1	0	0	0
A0A076ED64|A0A076ED64_PIG	NADH-ubiquinone oxidoreductase chain 5 OS=Sus scrofa domesticus OX=9825 GN=ND5 PE=3 SV=1	68748	6	6	0	0	3	2	0	3	4	0	1	0	0	0
W5U509|W5U509_PIG	NADH-ubiquinone oxidoreductase chain 5 OS=Sus scrofa OX=9823 GN=ND5 PE=3 SV=1	68676	6	6	0	0	3	2	0	3	4	0	1	0	0	0
A0S0D3|A0S0D3_PIG	NADH-ubiquinone oxidoreductase chain 5 OS=Sus scrofa OX=9823 GN=ND5 PE=3 SV=1	68662	6	6	0	0	3	2	0	3	4	0	1	0	0	0
B5KN69|B5KN69_PIG	NADH-ubiquinone oxidoreductase chain 5 OS=Sus scrofa OX=9823 GN=ND5 PE=3 SV=1	68757	6	6	0	0	3	2	0	3	4	0	1	0	0	0
A9LFM3|A9LFM3_PIG	NADH-ubiquinone oxidoreductase chain 5 OS=Sus scrofa OX=9823 GN=ND5 PE=3 SV=1	68732	6	6	0	0	3	2	0	3	4	0	1	0	0	0
A0A160EDV0|A0A160EDV0_PIG	NADH-ubiquinone oxidoreductase chain 5 OS=Sus scrofa domesticus OX=9825 GN=ND5 PE=3 SV=1	69125	6	6	0	0	3	2	0	3	4	0	1	0	0	0
A9LFL0|A9LFL0_PIG	NADH-ubiquinone oxidoreductase chain 5 OS=Sus scrofa OX=9823 GN=ND5 PE=3 SV=1	68700	6	6	0	0	3	2	0	3	4	0	1	0	0	0
A0A077EVJ9|A0A077EVJ9_PIG	NADH-ubiquinone oxidoreductase chain 5 OS=Sus scrofa OX=9823 GN=ND5 PE=3 SV=1	68703	6	6	0	0	3	2	0	3	4	0	1	0	0	0
A0A287BPU6|A0A287BPU6_PIG	Adenylate cyclase 3 OS=Sus scrofa OX=9823 GN=ADCY3 PE=1 SV=1	148245	6	6	4	3	1	4	2	1	3	1	0	5	9	2
F1SA98|F1SA98_PIG	Tyrosine 3-monooxygenase/tryptophan 5-monooxygenase activation protein theta OS=Sus scrofa OX=9823 GN=YWHAQ PE=1 SV=3	27764	14	8	1	5	3	1	1	0	1	1	0	10	11	2
F1SAB6|F1SAB6_PIG	Acyl carrier protein OS=Sus scrofa OX=9823 GN=NDUFAB1 PE=1 SV=2	17289	9	9	1	3	7	8	2	4	9	1	2	0	0	0
D0G781|D0G781_PIG	Acyl carrier protein OS=Sus scrofa OX=9823 GN=NDUFAB1 PE=2 SV=1	17319	9	9	1	0	7	8	0	4	9	0	2	0	0	0
F1SBF5|F1SBF5_PIG	Eyes absent homolog OS=Sus scrofa OX=9823 GN=EYA2 PE=3 SV=3	58882	6	6	9	5	2	6	6	5	2	6	3	0	0	0
F1SV49|F1SV49_PIG	DNA damage inducible 1 homolog 1 OS=Sus scrofa OX=9823 GN=DDI1 PE=4 SV=1	44766	7	7	7	6	6	2	5	1	0	0	1	0	0	0
I3LE93|I3LE93_PIG	Serine protease 37 OS=Sus scrofa OX=9823 GN=PRSS37 PE=4 SV=1	26421	10	10	8	1	5	4	3	3	2	1	2	0	0	0
A0A287AUZ0|A0A287AUZ0_PIG	Nucleophosmin/nucleoplasmin 2 OS=Sus scrofa OX=9823 GN=NPM2 PE=4 SV=1	20658	10	10	0	0	0	0	0	0	0	0	4	25	0	1
F6PTZ1|F6PTZ1_PIG	Nucleophosmin/nucleoplasmin 2 OS=Sus scrofa OX=9823 GN=NPM2 PE=4 SV=1	24394	10	10	0	0	0	0	0	0	0	2	4	25	30	1
D3K5P0|D3K5P0_PIG	Nucleophosmin/nucleoplasmin 2 OS=Sus scrofa OX=9823 GN=NPM2 PE=2 SV=1	24510	10	10	0	0	0	0	0	0	0	0	4	25	0	1
A0A287B719|A0A287B719_PIG	Mitochondrial ribosomal protein S36 OS=Sus scrofa OX=9823 GN=MRPS36 PE=1 SV=1	11463	9	9	0	0	4	0	0	0	0	0	0	5	4	9
I3LEC2|I3LEC2_PIG	Poly(rC) binding protein 1 OS=Sus scrofa OX=9823 GN=PCBP1 PE=1 SV=1	37502	8	6	4	10	0	5	9	0	3	1	0	4	4	0
I3LHM8|I3LHM8_PIG	Uncharacterized protein OS=Sus scrofa OX=9823 PE=4 SV=2	18857	5	5	2	0	4	3	2	0	2	1	0	0	0	0
A0A286ZS58|A0A286ZS58_PIG	MYCBP associated protein OS=Sus scrofa OX=9823 GN=MYCBPAP PE=4 SV=1	96260	9	9	0	0	0	1	0	0	3	0	0	1	0	0
F1RT99|F1RT99_PIG	MYCBP associated protein OS=Sus scrofa OX=9823 GN=MYCBPAP PE=4 SV=3	105636	9	9	0	0	8	1	0	2	3	0	0	1	0	0
A0A287A2M6|A0A287A2M6_PIG	MYCBP associated protein OS=Sus scrofa OX=9823 GN=MYCBPAP PE=4 SV=1	108949	9	9	0	2	8	1	11	2	3	0	0	1	13	0
A0A0B8RSC7|A0A0B8RSC7_PIG	Proteasome (Prosome macropain) 26S subunit non-ATPase 3 OS=Sus scrofa domesticus OX=9825 GN=PSMD3 PE=4 SV=1	60967	10	10	4	7	11	0	5	1	1	5	0	1	10	0
F1RXA7|F1RXA7_PIG	Proteasome 26S subunit non-ATPase 3 OS=Sus scrofa OX=9823 GN=PSMD3 PE=1 SV=3	60967	10	10	4	0	11	0	0	1	1	0	0	1	0	0
I3LL55|I3LL55_PIG	Proteasome 26S subunit non-ATPase 3 OS=Sus scrofa OX=9823 GN=PSMD3 PE=1 SV=2	59001	10	10	4	0	0	0	0	0	1	0	0	1	0	0
A0A286ZZM7|A0A286ZZM7_PIG	Thioredoxin domain containing 17 OS=Sus scrofa OX=9823 GN=TXNDC17 PE=1 SV=1	14078	6	6	2	4	1	3	3	0	1	4	1	4	14	1
A0A287AET3|A0A287AET3_PIG	Uncharacterized protein OS=Sus scrofa OX=9823 GN=ACAD10 PE=1 SV=1	115840	7	7	0	4	2	0	1	0	0	1	0	7	6	0
A0A287AFL8|A0A287AFL8_PIG	Uncharacterized protein OS=Sus scrofa OX=9823 GN=ACAD10 PE=1 SV=1	118319	7	7	0	0	2	0	0	0	0	0	0	7	0	0
I3LK34|I3LK34_PIG	Uncharacterized protein OS=Sus scrofa OX=9823 GN=ACAD10 PE=1 SV=2	113067	7	7	0	0	0	0	0	0	0	0	0	7	0	0
F1S6K5|F1S6K5_PIG	Adenine phosphoribosyltransferase OS=Sus scrofa OX=9823 GN=APRT PE=3 SV=1	19588	7	7	2	10	3	3	6	1	3	8	3	1	1	0
F2Z5V0|F2Z5V0_PIG	tRNA-splicing ligase RtcB homolog OS=Sus scrofa OX=9823 GN=RTCB PE=3 SV=1	55210	12	12	10	16	3	2	19	9	2	6	5	0	1	0
sp|Q19PY3|RTCB_PIG	tRNA-splicing ligase RtcB homolog OS=Sus scrofa OX=9823 GN=RTCB PE=2 SV=1	55238	12	12	10	0	3	2	0	9	2	0	5	0	0	0
F1SGN1|F1SGN1_PIG	Uncharacterized protein OS=Sus scrofa OX=9823 PE=4 SV=3	119680	7	7	6	0	1	5	0	7	1	0	8	0	0	0
I3LND9|I3LND9_PIG	Uncharacterized protein OS=Sus scrofa OX=9823 PE=4 SV=2	135460	7	7	6	11	1	5	10	7	1	5	8	0	3	0
A0A287A6K7|A0A287A6K7_PIG	Adipocyte plasma membrane associated protein OS=Sus scrofa OX=9823 GN=APMAP PE=1 SV=1	69320	8	8	0	0	0	0	0	0	0	0	0	11	22	0
A5GFT5|A5GFT5_PIG	Aminopeptidase-like 1 OS=Sus scrofa OX=9823 GN=NPEPL1 PE=1 SV=1	55656	9	9	6	0	3	0	0	2	0	0	0	0	0	0
A0A287AFW2|A0A287AFW2_PIG	Aminopeptidase like 1 OS=Sus scrofa OX=9823 GN=NPEPL1 PE=1 SV=1	52156	9	9	6	7	3	0	5	2	0	2	0	0	2	0
K4HXJ4|K4HXJ4_9CRYT	Actin (Fragment) OS=Cryptosporidium scrofarum OX=1239306 PE=3 SV=1	22421	7	1	0	0	0	3	0	0	6	0	0	13	0	0
B8Y651|B8Y651_PIG	NADH dehydrogenase [ubiquinone] 1 beta subcomplex subunit 8 mitochondrial OS=Sus scrofa OX=9823 GN=NDUFB8 PE=2 SV=1	21631	8	8	0	0	7	4	1	12	8	6	1	0	1	0
F1RWL7|F1RWL7_PIG	NADH dehydrogenase [ubiquinone] 1 beta subcomplex subunit 8 mitochondrial OS=Sus scrofa OX=9823 GN=NDUFB8 PE=1 SV=1	21676	8	8	0	0	7	4	0	12	8	0	1	0	0	0
F1SIZ2|F1SIZ2_PIG	POC1 centriolar protein A OS=Sus scrofa OX=9823 GN=POC1A PE=4 SV=3	45396	6	6	0	0	2	6	4	7	2	5	4	0	0	0
F1RIE2|F1RIE2_PIG	Damage specific DNA binding protein 1 OS=Sus scrofa OX=9823 GN=DDB1 PE=1 SV=2	125652	7	7	1	4	4	0	1	0	0	2	0	7	13	0
F1RI32|F1RI32_PIG	Uncharacterized protein OS=Sus scrofa OX=9823 GN=SARS2 PE=1 SV=3	58543	9	9	0	0	1	0	0	0	0	0	1	9	8	2
F1SL99|F1SL99_PIG	Uncharacterized protein OS=Sus scrofa OX=9823 GN=PTGES3 PE=1 SV=3	18697	4	4	15	8	7	8	8	14	10	13	7	1	1	0
F1SA62|F1SA62_PIG	Uncharacterized protein OS=Sus scrofa OX=9823 GN=NDUFA7 PE=1 SV=2	12629	7	7	0	1	8	8	4	6	6	0	0	0	0	0
F1SHR6|F1SHR6_PIG	Haloacid dehalogenase like hydrolase domain containing 5 OS=Sus scrofa OX=9823 GN=HDHD5 PE=1 SV=3	44899	8	8	0	0	3	0	1	0	0	0	0	2	2	0
F1SCH1|F1SCH1_PIG	NADH:ubiquinone oxidoreductase subunit B7 OS=Sus scrofa OX=9823 GN=NDUFB7 PE=1 SV=3	16458	3	3	0	0	12	4	1	5	6	2	11	0	0	0
F1S2H8|F1S2H8_PIG	IQ motif containing GTPase activating protein 2 OS=Sus scrofa OX=9823 GN=IQGAP2 PE=1 SV=3	177875	8	8	0	1	16	0	0	0	2	0	0	0	2	0
F1S2H7|F1S2H7_PIG	IQ motif containing GTPase activating protein 2 OS=Sus scrofa OX=9823 GN=IQGAP2 PE=1 SV=3	180815	8	8	0	0	16	0	0	0	2	0	0	0	0	0
K9J6M1|K9J6M1_PIG	Ras GTPase-activating-like protein IQGAP2 OS=Sus scrofa OX=9823 GN=IQGAP2 PE=2 SV=1	180962	8	8	0	0	16	0	0	0	2	0	0	0	0	0
K7GSE5|K7GSE5_PIG	NADH:ubiquinone oxidoreductase subunit B9 OS=Sus scrofa OX=9823 GN=NDUFB9 PE=1 SV=1	21827	7	7	1	1	15	6	3	14	11	8	14	2	2	0
D0G773|D0G773_PIG	Isovaleryl Coenzyme A dehydrogenase OS=Sus scrofa OX=9823 GN=IVD PE=2 SV=1	46680	7	7	1	0	5	0	0	0	0	0	1	9	9	0
A0A287AGS1|A0A287AGS1_PIG	Store-operated calcium entry associated regulatory factor OS=Sus scrofa OX=9823 GN=SARAF PE=1 SV=1	36785	5	5	3	4	1	7	3	3	7	1	0	0	0	0
sp|A5GFN6|RAEL1_PIG	mRNA export factor OS=Sus scrofa OX=9823 GN=RAE1 PE=3 SV=1	41025	7	7	11	9	10	6	8	2	1	1	0	1	2	0
G8IFA6|G8IFA6_PIG	Mitochondrial NADH dehydrogenase Fe-S protein 4 OS=Sus scrofa OX=9823 PE=1 SV=1	19689	5	5	0	0	2	2	0	2	2	0	0	0	0	1
I3LQ38|I3LQ38_PIG	NADH:ubiquinone oxidoreductase subunit S4 OS=Sus scrofa OX=9823 GN=NDUFS4 PE=1 SV=2	16465	5	5	0	0	0	2	0	0	2	0	0	0	0	0
A0A287AMN2|A0A287AMN2_PIG	NADH:ubiquinone oxidoreductase subunit S4 OS=Sus scrofa OX=9823 GN=NDUFS4 PE=1 SV=1	19718	5	5	0	0	2	2	0	2	2	0	0	0	0	1
A0A287AVW2|A0A287AVW2_PIG	Elongation factor Ts mitochondrial OS=Sus scrofa OX=9823 GN=TSFM PE=1 SV=1	41811	9	9	4	9	22	0	10	0	0	6	0	1	7	0
F1RZV0|F1RZV0_PIG	Zinc finger protein 451 OS=Sus scrofa OX=9823 GN=ZNF451 PE=1 SV=2	119144	11	11	8	0	0	4	0	0	6	0	0	0	0	0
F1SBB5|F1SBB5_PIG	NPC intracellular cholesterol transporter 1 OS=Sus scrofa OX=9823 GN=NPC1 PE=4 SV=3	141963	6	6	0	0	0	0	0	0	0	0	0	9	0	0
sp|P56941|NPC1_PIG	NPC intracellular cholesterol transporter 1 OS=Sus scrofa OX=9823 GN=NPC1 PE=2 SV=1	141963	6	6	0	0	0	0	0	0	0	0	0	9	9	0
F1SPB5|F1SPB5_PIG	Uncharacterized protein OS=Sus scrofa OX=9823 GN=MAATS1 PE=4 SV=3	89635	8	8	0	0	19	1	3	0	0	3	0	0	0	0
A0A287BEH4|A0A287BEH4_PIG	Uncharacterized protein OS=Sus scrofa OX=9823 GN=FAHD2B PE=4 SV=1	33364	6	1	1	0	0	0	0	0	0	0	0	13	0	0
F1SU52|F1SU52_PIG	Uncharacterized protein OS=Sus scrofa OX=9823 GN=FAHD2B PE=4 SV=3	33997	6	1	1	0	0	0	0	0	0	0	0	13	0	0
A0A287A2X3|A0A287A2X3_PIG	Carnitine O-acetyltransferase OS=Sus scrofa OX=9823 GN=CRAT PE=1 SV=1	70806	11	11	0	0	8	0	0	0	0	0	0	2	0	0
F1RR45|F1RR45_PIG	Carnitine O-acetyltransferase OS=Sus scrofa OX=9823 GN=CRAT PE=1 SV=2	70903	11	11	0	6	8	0	3	0	0	1	0	2	2	0
A9JPD4|A9JPD4_PIG	Carnitine acetyl transferase OS=Sus scrofa OX=9823 GN=CRAT PE=2 SV=1	70865	11	11	0	0	8	0	0	0	0	0	0	2	0	0
A0A287A9T9|A0A287A9T9_PIG	Short chain dehydrogenase/reductase family 39U member 1 OS=Sus scrofa OX=9823 GN=SDR39U1 PE=1 SV=1	31227	5	5	3	1	7	0	1	0	0	1	0	0	0	0
F1RHF0|F1RHF0_PIG	Ubiquitin carboxyl-terminal hydrolase OS=Sus scrofa OX=9823 GN=UCHL3 PE=1 SV=3	26164	7	7	2	7	19	0	2	1	1	0	0	2	3	1
A0A286ZTT9|A0A286ZTT9_PIG	Uncharacterized protein OS=Sus scrofa OX=9823 PE=4 SV=1	14158	4	1	0	0	0	0	0	0	0	0	0	11	0	0
A0A287AU26|A0A287AU26_PIG	Polypyrimidine tract-binding protein 1 OS=Sus scrofa OX=9823 GN=PTBP1 PE=1 SV=1	57264	6	6	2	6	0	6	10	3	4	0	3	0	3	0
F1RIK3|F1RIK3_PIG	Acyl-CoA thioesterase 7 OS=Sus scrofa OX=9823 GN=ACOT7 PE=1 SV=3	40768	8	8	5	0	13	2	0	6	1	0	4	0	0	0
A0A287B8N7|A0A287B8N7_PIG	Acyl-CoA thioesterase 7 OS=Sus scrofa OX=9823 GN=ACOT7 PE=1 SV=1	44587	8	8	5	0	13	2	0	6	1	0	4	0	0	0
A0A287BB59|A0A287BB59_PIG	Acyl-CoA thioesterase 7 OS=Sus scrofa OX=9823 GN=ACOT7 PE=1 SV=1	41716	8	8	5	0	13	2	0	6	1	0	4	0	0	0
A0A287A7V2|A0A287A7V2_PIG	Acyl-CoA thioesterase 7 OS=Sus scrofa OX=9823 GN=ACOT7 PE=1 SV=1	38651	8	8	5	10	0	2	8	0	1	5	0	0	0	0
A0A286ZMN8|A0A286ZMN8_PIG	Ankyrin repeat and SOCS box containing 5 OS=Sus scrofa OX=9823 GN=ASB5 PE=4 SV=1	33471	5	5	9	6	3	3	9	6	4	3	4	0	0	0
I3LDG3|I3LDG3_PIG	Ankyrin repeat and SOCS box containing 5 OS=Sus scrofa OX=9823 GN=ASB5 PE=4 SV=1	36389	5	5	9	0	3	3	0	6	4	0	4	0	0	0
F1S2K3|F1S2K3_PIG	Uncharacterized protein OS=Sus scrofa OX=9823 GN=NUTF2 PE=1 SV=1	14509	9	9	6	4	8	0	11	5	4	1	0	1	0	0
A0A286ZUD4|A0A286ZUD4_PIG	Testis expressed 33 OS=Sus scrofa OX=9823 GN=TEX33 PE=4 SV=1	29217	6	6	1	0	7	5	0	7	3	0	0	0	0	0
F1SKL3|F1SKL3_PIG	Testis expressed 33 OS=Sus scrofa OX=9823 GN=TEX33 PE=4 SV=2	30197	6	6	1	0	7	5	3	7	3	5	0	0	0	0
A0A286ZXU2|A0A286ZXU2_PIG	Uncharacterized protein OS=Sus scrofa OX=9823 GN=FLNA PE=1 SV=1	279882	7	5	0	0	0	1	0	0	0	0	0	5	0	0
A0A0B8RSX6|A0A0B8RSX6_PIG	Filamin A alpha OS=Sus scrofa domesticus OX=9825 GN=FLNA PE=4 SV=1	279882	7	5	0	0	0	1	0	0	0	0	0	5	0	0
A0A287A4W0|A0A287A4W0_PIG	Uncharacterized protein OS=Sus scrofa OX=9823 GN=FLNA PE=1 SV=1	302793	7	5	0	0	0	1	0	0	0	0	0	5	15	0
A0A287A5T4|A0A287A5T4_PIG	Uncharacterized protein OS=Sus scrofa OX=9823 GN=FLNA PE=1 SV=1	302072	7	5	0	0	0	1	0	0	0	0	0	5	0	0
A0A286ZNR2|A0A286ZNR2_PIG	Uncharacterized protein OS=Sus scrofa OX=9823 GN=FLNA PE=1 SV=1	280602	7	5	0	0	0	1	0	0	0	0	0	5	0	0
I3LC73|I3LC73_PIG	Uncharacterized protein OS=Sus scrofa OX=9823 GN=FASN PE=1 SV=2	272017	10	10	1	0	0	6	0	0	0	0	0	0	0	0
A5YV76|A5YV76_PIG	Fatty acid synthase OS=Sus scrofa OX=9823 GN=FASN PE=1 SV=1	272255	10	10	1	22	0	6	12	0	0	6	0	0	1	0
I3LLU0|I3LLU0_PIG	Glycerol-3-phosphate dehydrogenase [NAD(+)] OS=Sus scrofa OX=9823 GN=GPD1L PE=1 SV=1	38225	8	2	3	0	0	0	0	0	0	0	0	0	0	0
F1SPT0|F1SPT0_PIG	Ubiquitin specific peptidase 4 OS=Sus scrofa OX=9823 GN=USP4 PE=1 SV=3	101583	9	9	2	8	3	0	3	0	0	6	0	0	0	0
A0A287AEJ8|A0A287AEJ8_PIG	Ubiquitin specific peptidase 4 OS=Sus scrofa OX=9823 GN=USP4 PE=1 SV=1	108738	9	9	2	0	3	0	0	0	0	0	0	0	0	0
A0A287A103|A0A287A103_PIG	Ubiquitin specific peptidase 4 OS=Sus scrofa OX=9823 GN=USP4 PE=1 SV=1	111937	9	9	2	0	3	0	0	0	0	0	0	0	0	0
I3LC58|I3LC58_PIG	GLIPR1 like 2 OS=Sus scrofa OX=9823 GN=GLIPR1L2 PE=4 SV=2	39608	9	9	0	0	3	4	2	2	6	0	3	0	0	0
F1SE73|F1SE73_PIG	DnaJ heat shock protein family (Hsp40) member A1 OS=Sus scrofa OX=9823 GN=DNAJA1 PE=1 SV=1	44868	8	8	0	8	0	1	2	0	0	3	0	5	6	2
F1RTH3|F1RTH3_PIG	Apoptosis inducing factor mitochondria associated 1 OS=Sus scrofa OX=9823 GN=AIFM1 PE=4 SV=1	66798	9	9	0	0	0	0	0	0	0	0	0	11	0	0
A0A0B8RTX7|A0A0B8RTX7_PIG	Apoptosis-inducing factor mitochondrion-associated 1 OS=Sus scrofa domesticus OX=9825 GN=AIFM1 PE=4 SV=1	66798	9	9	0	0	0	0	0	0	0	0	0	11	0	0
A0A068CA64|A0A068CA64_PIG	Mitochondrial apoptosis-inducing factor 1 transcript variant 1 OS=Sus scrofa OX=9823 GN=AIFM1 PE=2 SV=1	66821	9	9	0	0	0	0	0	0	0	0	0	11	15	0
F1SEQ3|F1SEQ3_PIG	Growth hormone inducible transmembrane protein OS=Sus scrofa OX=9823 GN=GHITM PE=1 SV=1	37077	6	6	0	0	0	4	4	0	6	10	0	0	11	0
A0A287AJM8|A0A287AJM8_PIG	Thimet oligopeptidase OS=Sus scrofa OX=9823 GN=THOP1 PE=1 SV=1	74652	6	6	0	0	2	0	0	0	0	0	0	4	5	0
sp|P47788|THOP1_PIG	Thimet oligopeptidase OS=Sus scrofa OX=9823 GN=THOP1 PE=2 SV=2	78144	6	6	0	0	2	0	0	0	0	0	0	4	0	0
F1S8G5|F1S8G5_PIG	Thimet oligopeptidase OS=Sus scrofa OX=9823 GN=THOP1 PE=1 SV=3	75754	6	6	0	0	2	0	0	0	0	0	0	4	0	0
F1S179|F1S179_PIG	Thiosulfate sulfurtransferase like domain containing 1 OS=Sus scrofa OX=9823 GN=TSTD1 PE=1 SV=3	14953	5	5	3	5	6	1	2	0	0	2	0	3	6	4
A0A287AKZ9|A0A287AKZ9_PIG	V-type proton ATPase subunit G OS=Sus scrofa OX=9823 GN=ATP6V1G1 PE=1 SV=1	13724	7	7	2	6	10	1	2	3	1	1	1	2	2	3
F1RZL5|F1RZL5_PIG	Uncharacterized protein OS=Sus scrofa OX=9823 GN=LOC100525542 PE=4 SV=3	78736	8	8	5	1	12	1	3	14	3	1	7	0	0	0
F1RJX8|F1RJX8_PIG	Coatomer subunit alpha OS=Sus scrofa OX=9823 GN=COPA PE=1 SV=1	138441	9	9	7	24	0	2	17	0	0	6	0	9	43	0
A0A2C9F393|A0A2C9F393_PIG	Vinculin OS=Sus scrofa OX=9823 GN=VCL PE=1 SV=1	121779	10	10	0	0	0	0	0	0	0	0	0	10	5	0
sp|P26234|VINC_PIG	Vinculin OS=Sus scrofa OX=9823 GN=VCL PE=1 SV=4	123944	10	10	0	0	0	0	0	0	0	0	0	10	0	0
A0A287BSL4|A0A287BSL4_PIG	Vinculin OS=Sus scrofa OX=9823 GN=VCL PE=1 SV=1	101103	10	10	0	0	0	0	0	0	0	0	0	10	0	0
F1RX68|F1RX68_PIG	Serine/threonine-protein phosphatase OS=Sus scrofa OX=9823 GN=PPP2CB PE=3 SV=3	35575	7	6	7	0	15	1	0	5	2	0	3	1	0	0
sp|P11493|PP2AB_PIG	Serine/threonine-protein phosphatase 2A catalytic subunit beta isoform (Fragment) OS=Sus scrofa OX=9823 GN=PPP2CB PE=2 SV=2	33610	7	6	7	0	0	1	0	0	2	0	0	1	0	0
sp|P67776|PP2AA_PIG	Serine/threonine-protein phosphatase 2A catalytic subunit alpha isoform OS=Sus scrofa OX=9823 GN=PPP2CA PE=2 SV=1	35594	7	6	7	10	0	1	8	0	2	6	0	1	9	0
A0A1B2TT50|A0A1B2TT50_PIG	Serine/threonine-protein phosphatase OS=Sus scrofa OX=9823 GN=PPP2CA PE=2 SV=1	35594	7	6	7	0	0	1	0	0	2	0	0	1	0	0
sp|P20735|GGT1_PIG	Glutathione hydrolase 1 proenzyme OS=Sus scrofa OX=9823 GN=GGT1 PE=2 SV=1	61316	5	5	0	0	1	0	0	0	0	0	0	3	7	0
J9JIM2|J9JIM2_PIG	Glutathione hydrolase 1 proenzyme OS=Sus scrofa OX=9823 GN=GGT1 PE=4 SV=1	61330	5	5	0	0	1	0	0	0	0	0	0	3	0	0
F1S738|F1S738_PIG	Uncharacterized protein OS=Sus scrofa OX=9823 GN=ADGB PE=3 SV=3	181268	8	8	4	0	7	0	0	0	0	0	0	0	0	0
F1S749|F1S749_PIG	Uncharacterized protein OS=Sus scrofa OX=9823 GN=ADGB PE=3 SV=3	174290	8	8	4	0	7	0	1	0	0	0	0	0	0	0
A0A287BBG9|A0A287BBG9_PIG	Uncharacterized protein OS=Sus scrofa OX=9823 GN=ADGB PE=3 SV=1	179700	8	8	4	0	7	0	0	0	0	0	0	0	0	0
sp|A6M931|IF4A3_PIG	Eukaryotic initiation factor 4A-III OS=Sus scrofa OX=9823 GN=EIF4A3 PE=2 SV=1	46841	7	3	3	9	0	5	7	0	5	4	0	2	1	0
A0A287AKU6|A0A287AKU6_PIG	Programmed cell death 6 OS=Sus scrofa OX=9823 GN=PDCD6 PE=1 SV=1	21755	7	7	3	0	2	3	0	3	4	0	3	1	0	0
F1RN68|F1RN68_PIG	Carboxypeptidase D OS=Sus scrofa OX=9823 GN=CPD PE=1 SV=2	152185	7	7	2	0	20	0	0	2	0	0	0	0	0	0
I3L6E5|I3L6E5_PIG	Bromodomain containing 4 OS=Sus scrofa OX=9823 GN=BRD4 PE=4 SV=2	153565	7	7	8	9	2	9	10	4	4	8	3	0	0	0
E9NRZ8|E9NRZ8_PIG	Bromodomain-containing protein 4 OS=Sus scrofa OX=9823 GN=BRD4 PE=2 SV=1	152724	7	7	8	0	2	9	0	4	4	0	3	0	0	0
F1RQM4|F1RQM4_PIG	Malic enzyme OS=Sus scrofa OX=9823 GN=ME1 PE=1 SV=3	63820	6	6	0	0	0	0	0	0	0	0	0	9	10	0
A0A287ALA0|A0A287ALA0_PIG	Uncharacterized protein OS=Sus scrofa OX=9823 GN=BASP1 PE=1 SV=1	23088	7	7	0	0	0	0	0	0	0	0	0	7	4	5
A0A287BET7|A0A287BET7_PIG	Uncharacterized protein OS=Sus scrofa OX=9823 GN=CNTRL PE=4 SV=1	235515	8	8	10	0	5	1	0	2	1	0	0	0	0	0
A0A287BME5|A0A287BME5_PIG	Uncharacterized protein OS=Sus scrofa OX=9823 GN=CNTRL PE=4 SV=1	251680	8	8	10	0	5	1	0	2	1	0	0	0	0	0
A0A287B7G6|A0A287B7G6_PIG	Uncharacterized protein OS=Sus scrofa OX=9823 GN=CNTRL PE=4 SV=1	254641	8	8	10	11	5	1	7	2	1	1	0	0	0	0
A0A286ZVG8|A0A286ZVG8_PIG	Uncharacterized protein OS=Sus scrofa OX=9823 GN=CNTRL PE=4 SV=1	266036	8	8	10	0	5	1	0	2	1	0	0	0	0	0
A0A287A8Z7|A0A287A8Z7_PIG	Uncharacterized protein OS=Sus scrofa OX=9823 GN=CNTRL PE=4 SV=1	267906	8	8	10	0	5	1	0	2	1	0	0	0	0	0
A0A287A7X9|A0A287A7X9_PIG	Uncharacterized protein OS=Sus scrofa OX=9823 GN=CNTRL PE=4 SV=1	270618	8	8	10	0	5	1	0	2	1	0	0	0	0	0
sp|P12026|ACBP_PIG	Acyl-CoA-binding protein OS=Sus scrofa OX=9823 GN=DBI PE=1 SV=2	9896	7	7	0	0	1	0	0	0	0	0	0	9	7	6
F1RNQ2|F1RNQ2_PIG	Uncharacterized protein OS=Sus scrofa OX=9823 GN=MORN3 PE=4 SV=1	27851	6	6	3	5	8	10	7	5	6	6	0	0	0	0
sp|Q9GL01|RPN2_PIG	Dolichyl-diphosphooligosaccharide--protein glycosyltransferase subunit 2 OS=Sus scrofa OX=9823 GN=RPN2 PE=2 SV=1	69274	6	6	0	0	0	1	0	0	0	0	0	7	0	0
F1SEM2|F1SEM2_PIG	Dolichyl-diphosphooligosaccharide--protein glycosyltransferase subunit 2 OS=Sus scrofa OX=9823 GN=RPN2 PE=1 SV=3	71042	6	6	0	0	0	1	0	0	0	0	0	7	0	0
I3LLF2|I3LLF2_PIG	Dolichyl-diphosphooligosaccharide--protein glycosyltransferase subunit 2 OS=Sus scrofa OX=9823 GN=RPN2 PE=1 SV=2	69197	6	6	0	0	0	1	1	0	0	0	0	7	2	0
I3LRG0|I3LRG0_PIG	Dolichyl-diphosphooligosaccharide--protein glycosyltransferase subunit 2 OS=Sus scrofa OX=9823 GN=RPN2 PE=1 SV=2	69226	6	6	0	0	0	1	0	0	0	0	0	7	0	0
A0A286ZWN9|A0A286ZWN9_PIG	Retinol dehydrogenase 13 OS=Sus scrofa OX=9823 GN=RDH13 PE=3 SV=1	36206	6	6	0	4	2	0	1	0	0	0	0	5	1	0
A0A0B8RZ76|A0A0B8RZ76_PIG	Retinol dehydrogenase 13 (All-trans/9-cis) OS=Sus scrofa domesticus OX=9825 GN=RDH13 PE=3 SV=1	36206	6	6	0	0	2	0	0	0	0	0	0	5	0	0
F1SMR9|F1SMR9_PIG	Serine rich single-pass membrane protein 1 OS=Sus scrofa OX=9823 GN=SSMEM1 PE=4 SV=1	27987	5	5	14	8	0	5	13	3	4	3	1	0	0	0
F1SQ73|F1SQ73_PIG	IQ motif containing G OS=Sus scrofa OX=9823 GN=IQCG PE=4 SV=3	51132	6	6	0	0	9	1	1	3	5	1	0	0	0	0
F1RT83|F1RT83_PIG	Syndecan binding protein OS=Sus scrofa OX=9823 GN=SDCBP PE=1 SV=3	32429	7	7	4	1	0	7	4	0	1	0	0	1	1	0
A0A286ZKH9|A0A286ZKH9_PIG	Syndecan binding protein OS=Sus scrofa OX=9823 GN=SDCBP PE=1 SV=1	37197	7	7	4	0	0	7	0	0	1	0	0	1	0	0
F1RFE3|F1RFE3_PIG	Leucine carboxyl methyltransferase 1 OS=Sus scrofa OX=9823 GN=LCMT1 PE=1 SV=3	37943	6	6	4	4	9	3	4	3	2	1	2	0	0	0
sp|Q3ZD69|LMNA_PIG	Prelamin-A/C OS=Sus scrofa OX=9823 GN=LMNA PE=3 SV=1	74219	7	7	0	3	10	0	2	0	0	0	0	6	8	4
A0A287B1C7|A0A287B1C7_PIG	Prelamin-A/C OS=Sus scrofa OX=9823 GN=LMNA PE=1 SV=1	65185	7	7	0	0	10	0	0	0	0	0	0	6	0	4
F1RLQ2|F1RLQ2_PIG	Prelamin-A/C OS=Sus scrofa OX=9823 GN=LMNA PE=1 SV=1	74233	7	7	0	0	10	0	0	0	0	0	0	6	0	4
F1S5R1|F1S5R1_PIG	Tripartite motif containing 17 OS=Sus scrofa OX=9823 GN=TRIM17 PE=4 SV=3	54892	9	9	7	3	2	5	9	3	2	6	3	0	0	0
A0A287AN48|A0A287AN48_PIG	Radixin OS=Sus scrofa OX=9823 GN=RDX PE=1 SV=1	66498	7	1	0	3	0	1	1	0	2	2	0	10	15	0
A0A287AB04|A0A287AB04_PIG	Radixin OS=Sus scrofa OX=9823 GN=RDX PE=1 SV=1	66595	7	1	0	0	0	1	0	0	2	0	0	10	0	0
A0A286ZYV1|A0A286ZYV1_PIG	Radixin OS=Sus scrofa OX=9823 GN=RDX PE=1 SV=1	71067	7	1	0	0	3	1	0	0	2	0	0	10	0	0
A0A287BHA1|A0A287BHA1_PIG	Radixin OS=Sus scrofa OX=9823 GN=RDX PE=1 SV=1	68582	7	1	0	0	3	1	0	0	2	0	0	10	0	0
A0A287AQS9|A0A287AQS9_PIG	Radixin OS=Sus scrofa OX=9823 GN=RDX PE=1 SV=1	68679	7	1	0	0	3	1	0	0	2	0	0	10	0	0
F1SV14|F1SV14_PIG	Radixin OS=Sus scrofa OX=9823 GN=RDX PE=1 SV=3	72180	7	1	0	0	3	1	0	0	2	0	0	10	0	0
F1RH52|F1RH52_PIG	IZUMO family member 2 OS=Sus scrofa OX=9823 GN=IZUMO2 PE=4 SV=2	23277	6	6	5	0	8	6	0	5	2	0	5	0	0	0
A0A287BPW8|A0A287BPW8_PIG	NADH:ubiquinone oxidoreductase subunit B4 OS=Sus scrofa OX=9823 GN=NDUFB4 PE=1 SV=1	15096	6	6	0	0	6	3	1	5	6	4	0	1	2	0
sp|P50578|AK1A1_PIG	Aldo-keto reductase family 1 member A1 OS=Sus scrofa OX=9823 GN=AKR1A1 PE=1 SV=3	36582	11	10	1	3	2	0	5	0	0	2	0	10	21	1
A0A287A3Y9|A0A287A3Y9_PIG	Alcohol dehydrogenase [NADP(+)] OS=Sus scrofa OX=9823 GN=AKR1A1 PE=1 SV=1	39018	11	10	1	0	0	0	0	0	0	0	0	10	0	0
A0A286ZPT0|A0A286ZPT0_PIG	Coatomer subunit beta' OS=Sus scrofa OX=9823 GN=COPB2 PE=1 SV=1	102346	10	10	0	6	0	0	2	0	0	0	0	10	9	0
F1SL54|F1SL54_PIG	Coatomer subunit beta' OS=Sus scrofa OX=9823 GN=COPB2 PE=1 SV=3	102474	10	10	0	0	0	0	0	0	0	0	0	10	0	0
F1RZZ1|F1RZZ1_PIG	Uncharacterized protein OS=Sus scrofa OX=9823 GN=TBCD PE=1 SV=3	132418	7	7	2	10	0	1	0	0	0	0	0	3	4	0
sp|Q29307|ATIF1_PIG	ATPase inhibitor mitochondrial OS=Sus scrofa OX=9823 GN=ATP5IF1 PE=3 SV=2	12184	7	7	0	0	8	0	0	0	0	0	0	5	7	5
K7GT57|K7GT57_PIG	Spliceosome RNA helicase DDX39B OS=Sus scrofa OX=9823 GN=DDX39B PE=4 SV=2	57529	7	5	4	0	0	2	0	0	2	0	0	1	0	0
A0A286ZJT1|A0A286ZJT1_PIG	Spliceosome RNA helicase DDX39B OS=Sus scrofa OX=9823 GN=DDX39B PE=4 SV=1	56825	7	5	4	0	0	2	0	0	2	0	0	1	0	0
A0A0A1CMU0|A0A0A1CMU0_PIG	DEAD box polypeptide 39B OS=Sus scrofa OX=9823 GN=DDX39B PE=2 SV=1	49008	7	5	4	0	0	2	0	0	2	0	0	1	0	0
A0A2C9F348|A0A2C9F348_PIG	Spliceosome RNA helicase DDX39B OS=Sus scrofa OX=9823 GN=DDX39B PE=4 SV=1	59026	7	5	4	0	0	2	0	0	2	0	0	1	0	0
B9TSQ2|B9TSQ2_PIG	HLA-B-associated protein 1 OS=Sus scrofa OX=9823 GN=BAT1 PE=2 SV=1	48991	7	5	4	19	0	2	13	0	2	14	0	1	1	0
sp|Q29024|DX39B_PIG	Spliceosome RNA helicase DDX39B OS=Sus scrofa OX=9823 GN=DDX39B PE=3 SV=2	48991	7	5	4	0	0	2	0	0	2	0	0	1	0	0
A0A287BD57|A0A287BD57_PIG	Spliceosome RNA helicase DDX39B OS=Sus scrofa OX=9823 GN=DDX39B PE=4 SV=1	53410	7	5	4	0	0	2	0	0	2	0	0	1	0	0
F1RV73|F1RV73_PIG	Bone morphogenetic protein 15 OS=Sus scrofa OX=9823 GN=BMP15 PE=2 SV=2	45966	9	9	0	0	0	0	0	0	0	0	0	9	11	0
sp|P80031|GSTP1_PIG	Glutathione S-transferase P OS=Sus scrofa OX=9823 GN=GSTP1 PE=1 SV=2	23497	6	6	4	0	2	3	0	0	1	0	0	0	0	0
M3V836|M3V836_PIG	Glutathione S-transferase pi 1 OS=Sus scrofa OX=9823 GN=GSTP1 PE=1 SV=1	23642	6	6	4	10	2	3	3	0	1	5	0	0	3	0
A0A287AZ91|A0A287AZ91_PIG	Uncharacterized protein OS=Sus scrofa OX=9823 GN=LOC100739508 PE=1 SV=1	24584	6	6	4	0	2	3	0	0	1	0	0	0	0	0
F1RMB9|F1RMB9_PIG	Nudix hydrolase 18 OS=Sus scrofa OX=9823 GN=NUDT18 PE=3 SV=2	35662	6	6	3	8	6	1	4	2	1	5	1	0	0	0
A0A287B2G4|A0A287B2G4_PIG	GCN1 eIF2 alpha kinase activator homolog OS=Sus scrofa OX=9823 GN=GCN1 PE=1 SV=1	288131	6	6	3	36	0	5	26	0	3	8	0	0	0	0
K9IW91|K9IW91_PIG	GCN1 general control of amino-acid synthesis 1-like 1 OS=Sus scrofa OX=9823 GN=GCN1L1 PE=2 SV=1	292739	6	6	3	0	0	5	0	0	3	0	0	0	0	0
F1RJK5|F1RJK5_PIG	GCN1 eIF2 alpha kinase activator homolog OS=Sus scrofa OX=9823 GN=GCN1 PE=1 SV=3	271417	6	6	3	0	0	5	0	0	3	0	0	0	0	0
F1SB46|F1SB46_PIG	Radial spoke head 3 homolog OS=Sus scrofa OX=9823 GN=RSPH3 PE=4 SV=2	64942	7	7	1	0	15	2	0	2	5	1	0	0	0	0
F1RGE3|F1RGE3_PIG	NADH dehydrogenase [ubiquinone] 1 alpha subcomplex subunit 2 OS=Sus scrofa OX=9823 GN=NDUFA2 PE=1 SV=1	11082	6	6	0	0	6	2	0	2	2	1	1	1	1	0
F1RWJ6|F1RWJ6_PIG	Aminopeptidase OS=Sus scrofa OX=9823 GN=NPEPPS PE=1 SV=2	103624	10	10	1	4	15	0	0	0	0	0	0	2	12	0
F1RLC5|F1RLC5_PIG	Ferritin OS=Sus scrofa OX=9823 GN=FTMT PE=3 SV=2	27390	10	10	2	6	25	0	4	12	1	8	4	0	0	0
A0A0B8RZS7|A0A0B8RZS7_PIG	Sterol O-acyltransferase 2 OS=Sus scrofa domesticus OX=9825 GN=ACAT2 PE=3 SV=1	41355	7	7	2	0	6	0	0	0	0	0	0	0	0	0
A0A287AHQ0|A0A287AHQ0_PIG	Acetyl-CoA acetyltransferase 2 OS=Sus scrofa OX=9823 GN=ACAT2 PE=1 SV=1	41355	7	7	2	0	6	0	0	0	0	0	0	0	0	0
A0A287AXK7|A0A287AXK7_PIG	Uncharacterized protein OS=Sus scrofa OX=9823 GN=DUSP18 PE=3 SV=1	20962	6	4	6	7	1	6	7	6	6	5	6	1	2	0
F1RK86|F1RK86_PIG	Glyoxylate reductase 1 homolog OS=Sus scrofa OX=9823 GN=GLYR1 PE=1 SV=3	55422	6	6	1	9	0	0	7	0	1	4	0	4	0	0
A0A0B8RSW3|A0A0B8RSW3_PIG	Putative oxidoreductase GLYR1 OS=Sus scrofa domesticus OX=9825 GN=GLYR1 PE=4 SV=1	59838	6	6	1	0	0	0	0	0	1	0	0	4	0	0
A0A287A4T8|A0A287A4T8_PIG	Glyoxylate reductase 1 homolog OS=Sus scrofa OX=9823 GN=GLYR1 PE=1 SV=1	60557	6	6	1	0	0	0	0	0	1	0	0	4	0	0
I3LMN3|I3LMN3_PIG	Glyoxylate reductase 1 homolog OS=Sus scrofa OX=9823 GN=GLYR1 PE=1 SV=2	58638	6	6	1	0	0	0	0	0	1	0	0	4	0	0
A0A286ZQL1|A0A286ZQL1_PIG	Transducin beta like 2 OS=Sus scrofa OX=9823 GN=TBL2 PE=1 SV=1	46080	5	5	4	0	0	4	0	2	6	0	1	0	0	0
F1RJN4|F1RJN4_PIG	Transducin beta like 2 OS=Sus scrofa OX=9823 GN=TBL2 PE=1 SV=1	49739	5	5	4	0	0	4	0	2	6	0	1	0	0	0
A0A287B7U4|A0A287B7U4_PIG	Transmembrane protein 190 OS=Sus scrofa OX=9823 GN=TMEM190 PE=4 SV=1	19839	6	6	5	4	16	0	4	3	2	9	5	0	4	2
A0A287BSI6|A0A287BSI6_PIG	Armadillo repeat containing 6 OS=Sus scrofa OX=9823 GN=ARMC6 PE=1 SV=1	50465	7	7	4	2	1	2	4	6	7	6	3	0	0	0
A0A0B8RT73|A0A0B8RT73_PIG	Mitochondrial 2-oxoglutarate/malate carrier protein OS=Sus scrofa domesticus OX=9825 GN=SLC25A11 PE=3 SV=1	34107	5	5	2	0	3	0	0	0	0	0	0	3	7	0
A0A287AN76|A0A287AN76_PIG	Solute carrier family 25 member 11 OS=Sus scrofa OX=9823 GN=SLC25A11 PE=1 SV=1	34107	5	5	2	0	3	0	0	0	0	0	0	3	0	0
F1SEQ7|F1SEQ7_PIG	Peroxiredoxin like 2A OS=Sus scrofa OX=9823 GN=PRXL2A PE=1 SV=1	25615	9	9	0	0	0	0	0	0	0	0	0	9	0	0
A0A287ACV7|A0A287ACV7_PIG	Peroxiredoxin like 2A OS=Sus scrofa OX=9823 GN=PRXL2A PE=1 SV=1	24361	9	9	0	0	0	0	0	0	0	0	0	9	15	0
F1RHJ8|F1RHJ8_PIG	Uncharacterized protein OS=Sus scrofa OX=9823 PE=4 SV=1	9662	6	6	1	6	17	3	5	15	5	8	14	1	3	3
F1SMS8|F1SMS8_PIG	Lectin mannose binding 1 OS=Sus scrofa OX=9823 GN=LMAN1 PE=1 SV=2	58318	7	7	2	1	0	2	6	0	1	0	0	2	3	0
F1RIF8|F1RIF8_PIG	6-phosphogluconate dehydrogenase decarboxylating OS=Sus scrofa OX=9823 GN=PGD PE=1 SV=3	52301	6	6	0	4	11	0	1	0	0	0	0	1	5	0
F1S1I7|F1S1I7_PIG	CFAP97 domain containing 1 OS=Sus scrofa OX=9823 GN=CFAP97D1 PE=4 SV=3	19503	4	4	1	1	13	6	4	5	6	6	10	0	0	0
A0A287AQG9|A0A287AQG9_PIG	POF1B actin binding protein OS=Sus scrofa OX=9823 GN=POF1B PE=1 SV=1	61660	8	8	0	0	0	0	0	0	0	0	0	10	0	0
A0A286ZKX0|A0A286ZKX0_PIG	POF1B actin binding protein OS=Sus scrofa OX=9823 GN=POF1B PE=1 SV=1	65577	8	8	0	0	0	0	0	0	0	0	0	10	0	0
A0A286ZQV5|A0A286ZQV5_PIG	DnaJ heat shock protein family (Hsp40) member C13 OS=Sus scrofa OX=9823 GN=DNAJC13 PE=1 SV=1	254548	8	8	1	0	0	0	0	0	0	0	0	3	0	0
F1SPE9|F1SPE9_PIG	DnaJ heat shock protein family (Hsp40) member C13 OS=Sus scrofa OX=9823 GN=DNAJC13 PE=1 SV=2	253610	8	8	1	1	0	0	2	0	0	0	0	3	17	0
F2Z4Z1|F2Z4Z1_PIG	Tyrosine 3-monooxygenase/tryptophan 5-monooxygenase activation protein gamma OS=Sus scrofa OX=9823 GN=YWHAG PE=1 SV=1	28303	8	4	0	0	4	0	0	0	0	0	0	9	21	5
F1SB55|F1SB55_PIG	Peptidase mitochondrial processing beta subunit OS=Sus scrofa OX=9823 GN=PMPCB PE=1 SV=1	54375	8	8	0	0	0	0	0	0	0	0	0	7	2	0
A0A287A664|A0A287A664_PIG	Diacylglycerol kinase OS=Sus scrofa OX=9823 GN=DGKH PE=3 SV=1	129654	7	7	7	0	0	1	0	0	0	0	0	0	0	0
F1SAS9|F1SAS9_PIG	Cystatin OS=Sus scrofa OX=9823 GN=LOC100516119 PE=3 SV=1	16273	5	5	7	9	12	6	6	11	4	7	13	0	0	0
A0A287BSV7|A0A287BSV7_PIG	Myotubularin related protein 3 OS=Sus scrofa OX=9823 GN=MTMR3 PE=3 SV=1	122740	10	10	0	0	0	0	0	0	0	0	0	13	0	3
A0A287A901|A0A287A901_PIG	Myotubularin related protein 3 OS=Sus scrofa OX=9823 GN=MTMR3 PE=3 SV=1	124751	10	10	0	0	0	0	0	0	0	0	0	13	0	3
A0A287AZ60|A0A287AZ60_PIG	Myotubularin related protein 3 OS=Sus scrofa OX=9823 GN=MTMR3 PE=3 SV=1	130156	10	10	0	0	0	0	0	0	0	0	0	13	0	3
A0A287BKR8|A0A287BKR8_PIG	Myotubularin related protein 3 OS=Sus scrofa OX=9823 GN=MTMR3 PE=3 SV=1	136565	10	10	0	0	0	0	0	0	0	0	0	13	0	3
A0A287BMP5|A0A287BMP5_PIG	Myotubularin related protein 3 OS=Sus scrofa OX=9823 GN=MTMR3 PE=3 SV=1	135391	10	10	0	0	0	0	0	0	0	0	0	13	0	3
I3L643|I3L643_PIG	N-acetylglucosamine-6-sulfatase OS=Sus scrofa OX=9823 GN=GNS PE=1 SV=2	59909	7	7	0	0	0	0	0	0	0	0	0	10	0	0
K9IVU5|K9IVU5_PIG	N-acetylglucosamine-6-sulfatase OS=Sus scrofa OX=9823 GN=GNS PE=1 SV=1	62025	7	7	0	0	8	0	0	0	0	0	0	10	0	8
A0A0B8RSW0|A0A0B8RSW0_PIG	N-acetylglucosamine-6-sulfatase OS=Sus scrofa domesticus OX=9825 GN=GNS PE=3 SV=1	62025	7	7	0	0	8	0	0	0	0	0	0	10	0	8
A0A286ZUW1|A0A286ZUW1_PIG	N-acetylglucosamine-6-sulfatase OS=Sus scrofa OX=9823 GN=GNS PE=1 SV=1	59678	7	7	0	0	0	0	0	0	0	0	0	10	11	0
A0A287AXM3|A0A287AXM3_PIG	N-acetylglucosamine-6-sulfatase OS=Sus scrofa OX=9823 GN=GNS PE=1 SV=1	55652	7	7	0	0	8	0	0	0	0	0	0	10	0	8
F1S3W0|F1S3W0_PIG	Cytochrome b-c1 complex subunit 6 OS=Sus scrofa OX=9823 GN=LOC100524873 PE=1 SV=1	10671	6	6	0	1	0	7	0	0	2	0	0	3	5	0
F1SEJ9|F1SEJ9_PIG	Leucine rich repeat containing 18 OS=Sus scrofa OX=9823 GN=LRRC18 PE=4 SV=2	26263	6	6	2	4	4	4	3	0	6	1	0	0	0	0
F1RXG1|F1RXG1_PIG	Uncharacterized protein OS=Sus scrofa OX=9823 GN=KRT27 PE=3 SV=2	49706	8	3	6	0	0	1	0	0	1	0	0	43	0	0
I3L954|I3L954_PIG	Transketolase like 1 OS=Sus scrofa OX=9823 GN=TKTL1 PE=1 SV=2	64515	6	6	4	23	0	2	10	0	3	4	0	1	2	0
A1XQV6|A1XQV6_PIG	COX7A2 OS=Sus scrofa OX=9823 GN=COX7A2 PE=2 SV=1	9230	4	4	6	0	80	10	2	97	9	0	14	0	12	10
F1RQI1|F1RQI1_PIG	Uncharacterized protein OS=Sus scrofa OX=9823 GN=COX7A2 PE=1 SV=1	9244	4	4	6	0	80	10	0	97	9	0	14	0	0	10
A0A287BCT3|A0A287BCT3_PIG	UBX domain protein 11 OS=Sus scrofa OX=9823 GN=UBXN11 PE=4 SV=1	52157	7	7	2	0	0	1	0	0	1	0	0	0	0	0
F2Z5J1|F2Z5J1_PIG	Uncharacterized protein OS=Sus scrofa OX=9823 GN=PSMC1 PE=1 SV=1	49185	6	6	2	8	13	0	7	0	0	2	0	0	0	0
A0A287ANI6|A0A287ANI6_PIG	3-hydroxy-3-methylglutaryl-CoA lyase OS=Sus scrofa OX=9823 GN=HMGCL PE=1 SV=1	36674	6	6	2	3	10	0	1	0	0	0	0	1	1	0
A0A287AMC8|A0A287AMC8_PIG	3-hydroxy-3-methylglutaryl-CoA lyase OS=Sus scrofa OX=9823 GN=HMGCL PE=1 SV=1	31282	6	6	2	0	10	0	0	0	0	0	0	1	0	0
A0A287B1R6|A0A287B1R6_PIG	Armadillo repeat containing 8 OS=Sus scrofa OX=9823 GN=ARMC8 PE=1 SV=1	66059	6	6	2	9	0	2	10	0	4	5	0	0	4	0
F1RVY7|F1RVY7_PIG	Galactokinase 1 OS=Sus scrofa OX=9823 GN=GALK1 PE=1 SV=3	42092	8	8	0	0	0	0	0	0	0	0	0	10	13	3
I3LUU1|I3LUU1_PIG	Pterin-4 alpha-carbinolamine dehydratase 2 OS=Sus scrofa OX=9823 GN=PCBD2 PE=1 SV=2	14455	6	6	0	0	0	0	0	0	0	0	0	9	9	2
A0A287AB21|A0A287AB21_PIG	Uncharacterized protein OS=Sus scrofa OX=9823 GN=PPP4R1 PE=4 SV=1	99957	6	6	9	5	1	0	1	0	0	0	0	0	0	0
A0A0B8S051|A0A0B8S051_PIG	Methylcrotonoyl-CoA carboxylase 2 (Beta) OS=Sus scrofa domesticus OX=9825 GN=MCCC2 PE=4 SV=1	61318	5	5	1	0	7	0	0	0	0	0	0	0	0	0
F1RXS3|F1RXS3_PIG	Histone H2A OS=Sus scrofa OX=9823 GN=LOC100520991 PE=3 SV=2	13660	4	2	6	5	1	3	4	2	7	6	1	0	4	0
K9IVG2|K9IVG2_PIG	GLUT5 OS=Sus scrofa OX=9823 GN=SLC2A5 PE=2 SV=1	54920	6	6	1	0	5	0	0	0	0	0	0	0	0	0
A0A287A2X6|A0A287A2X6_PIG	Solute carrier family 2 member 5 OS=Sus scrofa OX=9823 GN=SLC2A5 PE=1 SV=1	54863	6	6	1	0	5	0	0	0	0	0	0	0	1	0
A0A286ZIF1|A0A286ZIF1_PIG	LRP2 binding protein OS=Sus scrofa OX=9823 GN=LRP2BP PE=4 SV=1	41908	5	5	0	0	4	5	0	4	5	3	0	0	0	0
F1RZQ4|F1RZQ4_PIG	LRP2 binding protein OS=Sus scrofa OX=9823 GN=LRP2BP PE=4 SV=2	40010	5	5	0	0	4	5	0	4	5	0	0	0	0	0
A0A286ZMY6|A0A286ZMY6_PIG	Fas associated factor family member 2 OS=Sus scrofa OX=9823 GN=FAF2 PE=1 SV=1	49448	5	5	7	9	0	5	11	0	2	6	0	0	0	0
F1S399|F1S399_PIG	Fas associated factor family member 2 OS=Sus scrofa OX=9823 GN=FAF2 PE=1 SV=3	41207	5	5	7	0	0	5	0	0	2	0	0	0	0	0
A0A286ZRK1|A0A286ZRK1_PIG	Ferritin OS=Sus scrofa OX=9823 PE=3 SV=1	34769	8	2	5	10	3	3	9	6	2	8	9	0	0	0
A0A286ZIJ0|A0A286ZIJ0_PIG	Ferritin OS=Sus scrofa OX=9823 PE=3 SV=1	35200	8	2	5	0	3	3	0	6	2	0	9	0	0	0
F1S4V8|F1S4V8_PIG	Uncharacterized protein OS=Sus scrofa OX=9823 GN=CPNE1 PE=1 SV=1	58996	5	5	0	0	0	1	0	0	1	0	0	5	0	0
B8XSK0|B8XSK0_PIG	Copine I OS=Sus scrofa OX=9823 GN=CPNE1 PE=2 SV=1	58992	5	5	0	2	0	1	2	0	1	0	0	5	10	0
A0A287B1D0|A0A287B1D0_PIG	Chromosome 9 open reading frame 135 OS=Sus scrofa OX=9823 GN=C9orf135 PE=4 SV=1	26780	12	12	3	7	7	2	5	11	7	9	26	1	1	0
K9J4P3|K9J4P3_PIG	UDP-glucose glycoprotein glucosyltransferase 1 OS=Sus scrofa OX=9823 GN=UGGT1 PE=2 SV=1	176565	6	6	0	0	0	0	0	0	0	1	0	5	9	0
A0A287BR64|A0A287BR64_PIG	Chromosome 4 open reading frame 45 OS=Sus scrofa OX=9823 GN=C4orf45 PE=4 SV=1	20903	7	7	2	2	8	3	2	16	6	6	14	0	0	0
I3LG81|I3LG81_PIG	Dpy-19 like C-mannosyltransferase 1 OS=Sus scrofa OX=9823 GN=DPY19L1 PE=1 SV=2	84564	7	4	7	8	0	1	3	0	1	3	0	3	1	0
A0A287A5F7|A0A287A5F7_PIG	Serine/threonine-protein phosphatase 2A 65 kDa regulatory subunit A beta isoform OS=Sus scrofa OX=9823 GN=PPP2R1B PE=4 SV=1	84100	5	3	2	11	0	4	9	0	1	4	0	0	1	0
I3L7S2|I3L7S2_PIG	Serine/threonine-protein phosphatase 2A 65 kDa regulatory subunit A beta isoform OS=Sus scrofa OX=9823 GN=PPP2R1B PE=4 SV=2	76639	5	3	2	0	0	4	0	0	1	0	0	0	0	0
sp|P54613|2AAB_PIG	Serine/threonine-protein phosphatase 2A 65 kDa regulatory subunit A beta isoform (Fragment) OS=Sus scrofa OX=9823 GN=PPP2R1B PE=2 SV=1	66214	5	3	2	0	0	4	0	0	1	0	0	0	0	0
A0A287APB4|A0A287APB4_PIG	Serine/threonine-protein phosphatase 2A 65 kDa regulatory subunit A beta isoform OS=Sus scrofa OX=9823 GN=PPP2R1B PE=4 SV=1	74116	5	3	2	0	0	4	0	0	1	0	0	0	0	0
F1SFV3|F1SFV3_PIG	Uncharacterized protein OS=Sus scrofa OX=9823 GN=S100A14 PE=3 SV=1	11444	4	4	1	2	0	1	0	0	0	0	0	8	1	0
F1SAJ5|F1SAJ5_PIG	DEAD (Asp-Glu-Ala-Asp) box helicase 6 OS=Sus scrofa OX=9823 GN=DDX6 PE=1 SV=1	54373	6	6	0	3	0	0	3	0	0	0	0	12	21	0
F1SM14|F1SM14_PIG	Secreted phosphoprotein 24 OS=Sus scrofa OX=9823 GN=SPP2 PE=4 SV=3	23123	5	1	0	0	0	0	0	0	0	0	0	6	0	0
sp|P79381|HYEP_PIG	Epoxide hydrolase 1 OS=Sus scrofa OX=9823 GN=EPHX1 PE=2 SV=1	52394	4	4	0	0	0	0	0	0	0	0	0	6	0	0
A0A2C9F385|A0A2C9F385_PIG	Epoxide hydrolase OS=Sus scrofa OX=9823 GN=EPHX1 PE=3 SV=1	52194	4	4	0	0	0	0	0	0	0	0	0	6	9	0
D3K5K2|D3K5K2_PIG	Peptidylprolyl isomerase OS=Sus scrofa OX=9823 GN=FKBP4 PE=2 SV=1	51317	6	6	1	10	13	0	8	0	1	1	0	2	8	2
F1SK86|F1SK86_PIG	Peptidylprolyl isomerase OS=Sus scrofa OX=9823 GN=FKBP4 PE=1 SV=2	51176	6	6	1	0	0	0	0	0	1	0	0	2	0	0
F1SDR6|F1SDR6_PIG	Polyadenylate-binding protein OS=Sus scrofa OX=9823 GN=PABPC1L PE=3 SV=3	67513	7	7	0	0	0	0	0	0	0	0	0	6	15	7
F1RKC7|F1RKC7_PIG	Phospholipase B-like OS=Sus scrofa OX=9823 GN=PLBD2 PE=1 SV=3	65837	6	6	1	0	17	0	1	0	0	1	0	1	2	1
Q5K4G2|Q5K4G2_PIG	Lysosome-associated membrane glycoprotein 1 OS=Sus scrofa OX=9823 GN=LAMP-1 PE=2 SV=1	43903	4	4	0	0	0	0	0	0	0	0	0	4	9	0
F1RN44|F1RN44_PIG	Uncharacterized protein OS=Sus scrofa OX=9823 GN=LAMP1 PE=1 SV=2	43932	4	4	0	0	0	0	0	0	0	0	0	4	0	0
F1RPE1|F1RPE1_PIG	Chromosome 5 open reading frame 52 OS=Sus scrofa OX=9823 GN=C5orf52 PE=4 SV=2	21666	5	5	2	6	3	3	2	0	3	3	1	0	0	0
A0A286ZTU0|A0A286ZTU0_PIG	Nucleoporin 54 OS=Sus scrofa OX=9823 GN=NUP54 PE=1 SV=1	55996	6	6	2	0	2	0	2	0	0	2	0	0	0	0
A0A0B8RVN3|A0A0B8RVN3_PIG	Nucleoporin 54kDa OS=Sus scrofa domesticus OX=9825 GN=NUP54 PE=4 SV=1	55996	6	6	2	0	2	0	0	0	0	0	0	0	0	0
F1RYT5|F1RYT5_PIG	Nucleoporin 54 OS=Sus scrofa OX=9823 GN=NUP54 PE=1 SV=3	61258	6	6	2	0	2	0	0	0	0	0	0	0	0	0
Q06AS6|Q06AS6_PIG	G protein subunit alpha i2 OS=Sus scrofa OX=9823 GN=GNAI2 PE=1 SV=1	40465	8	4	0	0	0	3	0	0	2	0	0	7	0	0
Q06AS7|Q06AS7_PIG	GBI1 OS=Sus scrofa OX=9823 PE=2 SV=1	40516	8	4	0	0	0	3	1	0	2	2	0	7	7	0
F1RK74|F1RK74_PIG	Solute carrier family 25 member 1 OS=Sus scrofa OX=9823 GN=SLC25A1 PE=1 SV=3	33957	5	5	1	2	8	0	0	0	0	0	0	0	7	0
F1SNL7|F1SNL7_PIG	Carnosine dipeptidase 2 OS=Sus scrofa OX=9823 GN=CNDP2 PE=1 SV=1	52734	9	9	1	5	7	1	1	0	1	0	0	4	5	0
I3LM99|I3LM99_PIG	Grancalcin OS=Sus scrofa OX=9823 GN=GCA PE=1 SV=2	33425	4	4	0	1	0	0	2	0	1	0	0	5	6	0
F1S2K6|F1S2K6_PIG	Translin associated factor X interacting protein 1 OS=Sus scrofa OX=9823 GN=TSNAXIP1 PE=4 SV=1	83351	6	6	0	0	16	0	1	0	0	0	0	0	0	0
F1RPC8|F1RPC8_PIG	Crystallin mu OS=Sus scrofa OX=9823 GN=CRYM PE=1 SV=2	33508	4	4	0	0	0	3	0	0	2	0	0	6	3	0
F1RXI9|F1RXI9_PIG	Uncharacterized protein OS=Sus scrofa OX=9823 GN=TEX13B PE=4 SV=2	41778	6	6	3	5	4	2	2	6	1	0	4	0	0	0
A0A0B8RZ86|A0A0B8RZ86_PIG	Proteasome (Prosome macropain) activator subunit 4 OS=Sus scrofa domesticus OX=9825 GN=PSME4 PE=4 SV=1	198467	9	9	7	0	0	1	0	0	1	0	0	0	0	0
A0A287BM69|A0A287BM69_PIG	Proteasome activator subunit 4 OS=Sus scrofa OX=9823 GN=PSME4 PE=4 SV=1	196826	9	9	7	0	0	1	0	0	1	0	0	0	0	0
sp|O46374|TOP2A_PIG	DNA topoisomerase 2-alpha OS=Sus scrofa OX=9823 GN=TOP2A PE=2 SV=1	174306	5	5	1	31	0	4	16	0	4	17	0	0	0	0
F1RUE0|F1RUE0_PIG	Acyl-CoA thioesterase 13 OS=Sus scrofa OX=9823 GN=ACOT13 PE=1 SV=2	15184	5	5	0	0	4	0	0	0	0	0	0	1	0	0
F1ST05|F1ST05_PIG	Chromodomain helicase DNA binding protein 3 OS=Sus scrofa OX=9823 GN=CHD3 PE=3 SV=1	26621	4	4	0	1	17	0	0	11	2	0	2	0	0	1
I3L8U6|I3L8U6_PIG	Tudor domain containing 6 OS=Sus scrofa OX=9823 GN=TDRD6 PE=1 SV=2	237027	6	6	4	44	0	5	49	0	2	16	0	0	0	0
A0A287AZ54|A0A287AZ54_PIG	Pyridoxal phosphatase OS=Sus scrofa OX=9823 GN=PDXP PE=1 SV=1	31936	5	5	0	0	0	0	0	0	0	0	0	6	5	0
F1SGX4|F1SGX4_PIG	Uncharacterized protein OS=Sus scrofa OX=9823 GN=CBR3 PE=1 SV=1	30663	8	7	0	1	0	0	1	0	0	1	0	8	5	0
A0A287B3Z0|A0A287B3Z0_PIG	Patatin like phospholipase domain containing 7 OS=Sus scrofa OX=9823 GN=PNPLA7 PE=4 SV=1	144087	5	5	1	4	0	1	2	0	0	1	0	0	0	0
A0A2C9F3D9|A0A2C9F3D9_PIG	Vimentin OS=Sus scrofa OX=9823 GN=VIM PE=1 SV=1	49221	4	2	0	0	0	0	0	0	2	0	0	6	26	25
A0A0B8RVD8|A0A0B8RVD8_PIG	Vimentin OS=Sus scrofa domesticus OX=9825 GN=VIM PE=3 SV=1	53668	4	2	0	0	0	0	0	0	2	0	0	6	0	25
sp|P02543|VIME_PIG	Vimentin OS=Sus scrofa OX=9823 GN=VIM PE=1 SV=2	53668	4	2	0	0	0	0	0	0	2	0	0	6	0	25
I3LFJ5|I3LFJ5_PIG	SURP and G-patch domain containing 2 OS=Sus scrofa OX=9823 GN=SUGP2 PE=1 SV=2	112232	8	8	5	0	0	4	0	0	2	0	0	0	0	0
A0A287AIE8|A0A287AIE8_PIG	SURP and G-patch domain containing 2 OS=Sus scrofa OX=9823 GN=SUGP2 PE=1 SV=1	121138	8	8	5	0	0	4	0	0	2	0	0	0	0	0
A0A287A9I4|A0A287A9I4_PIG	SURP and G-patch domain containing 2 OS=Sus scrofa OX=9823 GN=SUGP2 PE=1 SV=1	118522	8	8	5	0	0	4	0	0	2	0	0	0	0	0
A0A287ANM5|A0A287ANM5_PIG	SURP and G-patch domain containing 2 OS=Sus scrofa OX=9823 GN=SUGP2 PE=1 SV=1	118689	8	8	5	31	0	4	27	0	2	15	0	0	1	0
A0A287APM1|A0A287APM1_PIG	SURP and G-patch domain containing 2 OS=Sus scrofa OX=9823 GN=SUGP2 PE=1 SV=1	116073	8	8	5	0	0	4	0	0	2	0	0	0	0	0
I3L5H4|I3L5H4_PIG	SUMO peptidase family member NEDD8 specific OS=Sus scrofa OX=9823 GN=SENP8 PE=4 SV=2	24180	4	4	6	2	1	4	5	3	3	3	1	1	0	0
F2Z5F2|F2Z5F2_PIG	Uncharacterized protein OS=Sus scrofa OX=9823 GN=RAB10 PE=1 SV=1	22541	9	6	0	6	3	5	3	2	1	3	2	8	7	2
sp|Q29214|RLA0_PIG	60S acidic ribosomal protein P0 OS=Sus scrofa OX=9823 GN=RPLP0 PE=1 SV=2	34359	5	5	6	9	0	1	4	0	0	2	0	3	4	0
Q1W2G0|Q1W2G0_PIG	14-3-3 sigma protein OS=Sus scrofa OX=9823 GN=Sfn PE=2 SV=1	27935	7	5	0	1	0	0	0	0	0	0	0	8	5	0
F1SRV4|F1SRV4_PIG	Glutathione S-transferase kappa OS=Sus scrofa OX=9823 GN=GSTK1 PE=1 SV=1	25496	6	6	0	6	16	0	1	0	0	0	0	5	11	1
F1SD24|F1SD24_PIG	Uncharacterized protein OS=Sus scrofa OX=9823 GN=PTI PE=4 SV=2	10704	7	2	0	0	0	0	0	0	11	0	0	64	0	0
F1S3D5|F1S3D5_PIG	Lectin mannose binding 2 OS=Sus scrofa OX=9823 GN=LMAN2 PE=1 SV=1	40419	10	10	1	1	0	0	0	0	0	0	0	7	14	0
F1SCJ3|F1SCJ3_PIG	Uncharacterized protein OS=Sus scrofa OX=9823 PE=4 SV=2	24549	5	5	3	3	2	5	1	3	8	4	9	0	0	0
F1S5M0|F1S5M0_PIG	ATPase H+ transporting V1 subunit E2 OS=Sus scrofa OX=9823 GN=ATP6V1E2 PE=3 SV=1	26081	5	3	0	2	13	1	0	2	1	2	0	0	0	1
A0A287AVV8|A0A287AVV8_PIG	Phospholipid-transporting ATPase OS=Sus scrofa OX=9823 GN=ATP8B3 PE=3 SV=1	158639	10	10	0	0	0	0	0	0	0	0	0	0	0	0
sp|Q2EN75|S10A6_PIG	Protein S100-A6 OS=Sus scrofa OX=9823 GN=S100A6 PE=3 SV=1	10060	5	5	2	0	0	1	0	0	1	0	0	3	0	0
I3L7Z6|I3L7Z6_PIG	Protein S100 OS=Sus scrofa OX=9823 GN=S100A6 PE=3 SV=2	10088	5	5	2	0	0	1	0	0	1	11	0	3	0	0
A0A0B8RT62|A0A0B8RT62_PIG	N/A OS=Sus scrofa domesticus OX=9825 GN=C7H6orf106 PE=4 SV=1	32076	5	5	3	7	2	3	4	2	4	2	1	0	0	0
F6PVY0|F6PVY0_PIG	Uncharacterized protein OS=Sus scrofa OX=9823 GN=FABP5 PE=1 SV=1	26019	6	6	0	0	0	0	0	0	0	0	0	5	0	0
Q2EN74|Q2EN74_PIG	Epidermal fatty acid-binding protein OS=Sus scrofa OX=9823 GN=FABP5 PE=1 SV=1	15209	6	6	0	0	0	0	0	0	0	0	0	5	0	0
Q19KE2|Q19KE2_PIG	Fatty acid binding protein 5 (Fragment) OS=Sus scrofa OX=9823 GN=FABP5 PE=2 SV=1	13939	6	6	0	0	0	0	0	0	0	0	0	5	0	0
A0A0B8RW50|A0A0B8RW50_PIG	Acyl-CoA synthetase long-chain family member 4 OS=Sus scrofa domesticus OX=9825 GN=ACSL4 PE=4 SV=1	74479	4	2	0	2	0	2	8	0	1	5	0	1	4	0
Q2QC87|Q2QC87_PIG	Acyl-CoA synthetase long chain family member 4 OS=Sus scrofa OX=9823 GN=ACSL4 PE=1 SV=1	74479	4	2	0	0	0	2	0	0	1	0	0	1	0	0
B2CXA8|B2CXA8_PIG	Acyl-CoA synthetase long-chain family member 4 OS=Sus scrofa OX=9823 GN=ACSL4 PE=2 SV=1	74330	4	2	0	0	0	2	0	0	1	0	0	1	0	0
A0A287BK93|A0A287BK93_PIG	Acyl-CoA synthetase long chain family member 4 OS=Sus scrofa OX=9823 GN=ACSL4 PE=1 SV=1	79260	4	2	0	0	0	2	0	0	1	0	0	1	0	0
I3LN84|I3LN84_PIG	Latexin OS=Sus scrofa OX=9823 GN=LXN PE=1 SV=1	25605	4	4	3	1	0	3	1	0	3	1	0	2	2	0
F1SK58|F1SK58_PIG	Heat shock protein family A (Hsp70) member 13 OS=Sus scrofa OX=9823 GN=HSPA13 PE=1 SV=1	52153	7	7	1	0	0	6	0	0	4	0	0	0	0	0
A0A286ZTX0|A0A286ZTX0_PIG	Heat shock protein family A (Hsp70) member 13 OS=Sus scrofa OX=9823 GN=HSPA13 PE=1 SV=1	44995	7	7	1	0	0	6	0	0	4	0	0	0	0	0
I3LQ01|I3LQ01_PIG	Calmegin OS=Sus scrofa OX=9823 GN=CLGN PE=1 SV=1	69767	8	8	3	14	0	1	17	0	4	9	0	0	1	0
F1RY43|F1RY43_PIG	Pyruvate dehyrogenase phosphatase catalytic subunit 1 OS=Sus scrofa OX=9823 GN=PDP1 PE=1 SV=1	60998	7	7	0	0	3	0	0	0	0	0	0	4	0	0
A0A287A5F9|A0A287A5F9_PIG	Pyruvate dehyrogenase phosphatase catalytic subunit 1 OS=Sus scrofa OX=9823 GN=PDP1 PE=1 SV=1	63613	7	7	0	2	3	0	1	0	0	0	0	4	5	0
A0A287B9C6|A0A287B9C6_PIG	Pyruvate dehyrogenase phosphatase catalytic subunit 1 OS=Sus scrofa OX=9823 GN=PDP1 PE=1 SV=1	60400	7	7	0	0	0	0	0	0	0	0	0	4	0	0
A0A287AQA7|A0A287AQA7_PIG	Coiled-coil domain containing 187 OS=Sus scrofa OX=9823 GN=CCDC187 PE=4 SV=1	108926	9	9	9	5	0	5	7	0	1	0	0	0	0	0
A0A287AMK3|A0A287AMK3_PIG	Coiled-coil domain containing 187 OS=Sus scrofa OX=9823 GN=CCDC187 PE=4 SV=1	136516	9	9	9	0	0	5	0	0	1	0	0	0	0	0
F1S564|F1S564_PIG	Uncharacterized protein OS=Sus scrofa OX=9823 GN=RTCA PE=1 SV=3	39206	6	6	0	5	0	0	5	0	0	2	0	9	1	0
F1RYU5|F1RYU5_PIG	NAD(P)(+)--arginine ADP-ribosyltransferase OS=Sus scrofa OX=9823 GN=ART3 PE=1 SV=2	42646	6	6	2	0	5	2	2	0	0	0	0	0	0	0
F1S2N5|F1S2N5_PIG	Leucine rich repeat containing 74A OS=Sus scrofa OX=9823 GN=LRRC74A PE=4 SV=3	55837	5	5	0	0	5	5	1	1	6	0	0	0	0	0
I3LV17|I3LV17_PIG	RAS like proto-oncogene B OS=Sus scrofa OX=9823 GN=RALB PE=1 SV=2	23393	6	2	0	0	0	0	0	0	0	0	0	8	11	0
F1RXC2|F1RXC2_PIG	Carbonic anhydrase 2 OS=Sus scrofa OX=9823 GN=CA2 PE=1 SV=2	29258	6	6	3	3	8	0	0	0	0	0	0	0	0	0
A0A076JEC0|A0A076JEC0_PIG	NADH-ubiquinone oxidoreductase chain 4 OS=Sus scrofa OX=9823 GN=ND4 PE=3 SV=1	51819	5	5	1	0	2	5	0	2	0	0	2	1	0	0
F1SA26|F1SA26_PIG	Arginase OS=Sus scrofa OX=9823 GN=ARG2 PE=3 SV=1	38570	6	6	1	0	3	0	0	0	0	0	0	4	2	0
A0A287A4A5|A0A287A4A5_PIG	SEC22 homolog B vesicle trafficking protein (gene/pseudogene) OS=Sus scrofa OX=9823 GN=SEC22B PE=1 SV=1	24123	3	3	1	5	0	2	5	0	2	3	3	2	4	0
A0A0B8RSA5|A0A0B8RSA5_PIG	Vesicle-trafficking protein SEC22b OS=Sus scrofa domesticus OX=9825 GN=SEC22B PE=3 SV=1	24757	3	3	1	0	0	2	0	0	2	0	3	2	0	0
F1SB09|F1SB09_PIG	SEC22 homolog B vesicle trafficking protein (gene/pseudogene) OS=Sus scrofa OX=9823 GN=SEC22B PE=1 SV=1	24757	3	3	1	0	0	2	0	0	2	0	3	2	0	0
A0A287BFF4|A0A287BFF4_PIG	Glutaminase OS=Sus scrofa OX=9823 GN=GLS PE=1 SV=1	73540	6	6	1	5	6	0	0	0	0	5	0	0	0	0
A0A287BBQ0|A0A287BBQ0_PIG	Insulin like growth factor 2 mRNA binding protein 3 OS=Sus scrofa OX=9823 GN=IGF2BP3 PE=1 SV=1	59404	5	3	0	0	0	0	0	0	0	0	0	4	3	3
A0A287A9X8|A0A287A9X8_PIG	Insulin like growth factor 2 mRNA binding protein 3 OS=Sus scrofa OX=9823 GN=IGF2BP3 PE=1 SV=1	63741	5	3	0	0	0	0	0	0	0	0	0	4	0	3
A0A0B8RZH0|A0A0B8RZH0_PIG	Insulin-like growth factor 2 mRNA binding protein 3 OS=Sus scrofa domesticus OX=9825 GN=IGF2BP3 PE=4 SV=1	63741	5	3	0	0	0	0	0	0	0	0	0	4	0	3
A0A287ABU5|A0A287ABU5_PIG	Insulin like growth factor 2 mRNA binding protein 3 OS=Sus scrofa OX=9823 GN=IGF2BP3 PE=4 SV=1	56026	5	3	0	0	0	0	0	0	0	0	0	4	0	3
A0A2C9F3A7|A0A2C9F3A7_PIG	Thioredoxin OS=Sus scrofa OX=9823 GN=TXN PE=1 SV=1	11660	6	6	0	0	0	0	0	0	0	0	0	13	0	0
sp|P82460|THIO_PIG	Thioredoxin OS=Sus scrofa OX=9823 GN=TXN PE=1 SV=3	11829	6	6	0	0	0	0	0	0	0	0	0	13	7	4
H6TBN0|H6TBN0_PIG	Thioredoxin OS=Sus scrofa OX=9823 GN=TRX1 PE=2 SV=1	11829	6	6	0	0	0	0	0	0	0	0	0	13	0	4
A0A287AZV7|A0A287AZV7_PIG	NADH dehydrogenase [ubiquinone] 1 subunit C2 OS=Sus scrofa OX=9823 GN=NDUFC2 PE=1 SV=1	14307	5	5	0	0	9	6	2	10	3	1	0	1	1	2
A0A287A1S1|A0A287A1S1_PIG	Sec1 family domain containing 1 OS=Sus scrofa OX=9823 GN=SCFD1 PE=1 SV=1	72336	7	7	2	6	0	4	6	0	3	1	0	0	4	0
A0A286ZQ07|A0A286ZQ07_PIG	Solute carrier family 25 member 12 OS=Sus scrofa OX=9823 GN=SLC25A12 PE=1 SV=1	75031	7	7	4	0	5	0	0	0	0	0	0	0	0	0
F1S086|F1S086_PIG	Solute carrier family 25 (Aspartate/glutamate carrier) member 12 OS=Sus scrofa OX=9823 GN=SLC25A12 PE=1 SV=3	74769	7	7	4	1	5	0	0	0	0	0	0	0	2	0
sp|O19175|KC1A_PIG	Casein kinase I isoform alpha (Fragment) OS=Sus scrofa OX=9823 GN=CSNK1A1 PE=2 SV=1	14633	5	5	4	0	0	2	0	0	1	0	0	0	0	0
A0A287AH57|A0A287AH57_PIG	Uncharacterized protein OS=Sus scrofa OX=9823 GN=UBE2J1 PE=1 SV=1	35133	8	8	8	0	0	2	0	4	1	0	2	0	0	0
K7GQ95|K7GQ95_PIG	Protein S100 OS=Sus scrofa OX=9823 GN=S100A2 PE=1 SV=1	10960	4	4	1	0	0	1	0	0	1	0	0	4	0	0
F1SEQ9|F1SEQ9_PIG	DPY30 domain containing 1 OS=Sus scrofa OX=9823 GN=DYDC1 PE=4 SV=3	21684	3	3	0	0	14	2	1	2	3	5	0	0	0	1
A0A287ATY6|A0A287ATY6_PIG	DPY30 domain containing 1 OS=Sus scrofa OX=9823 GN=DYDC1 PE=4 SV=1	16933	3	3	0	0	0	2	0	0	3	0	0	0	0	0
I3LLG4|I3LLG4_PIG	DnaJ heat shock protein family (Hsp40) member A3 OS=Sus scrofa OX=9823 GN=DNAJA3 PE=1 SV=2	53967	4	4	0	0	0	1	2	0	3	1	0	1	6	0
D5K8A0|D5K8A0_PIG	Spermatogenesis associated 4 OS=Sus scrofa OX=9823 GN=SPATA4 PE=2 SV=1	35186	6	6	0	0	5	1	1	3	3	3	1	0	0	1
sp|Q711S8|SPP24_PIG	Secreted phosphoprotein 24 OS=Sus scrofa OX=9823 GN=SPP2 PE=2 SV=1	23097	5	1	0	0	0	0	0	0	0	0	0	6	3	0
F1RRB8|F1RRB8_PIG	DLEC1 cilia and flagella associated protein OS=Sus scrofa OX=9823 GN=DLEC1 PE=4 SV=3	192223	5	5	2	1	1	1	1	0	0	6	0	0	0	0
Q8MI70|Q8MI70_PIG	Epididymal secretory protein E3 (Fragment) OS=Sus scrofa OX=9823 GN=E3 PE=1 SV=1	18039	6	6	4	6	6	4	7	5	2	5	3	0	0	0
F1SCV6|F1SCV6_PIG	Cilia and flagella associated protein 46 OS=Sus scrofa OX=9823 GN=CFAP46 PE=4 SV=3	248424	7	7	1	0	5	0	0	0	0	0	0	0	1	0
A0A287A1T3|A0A287A1T3_PIG	Uncharacterized protein OS=Sus scrofa OX=9823 GN=SEPT5 PE=1 SV=1	44814	5	5	7	0	2	1	0	2	1	0	0	0	0	0
A0A173G6H0|A0A173G6H0_PIG	Septin 5 OS=Sus scrofa OX=9823 PE=2 SV=1	42719	5	5	7	6	2	1	3	2	1	1	0	0	0	0
A0A287AYP1|A0A287AYP1_PIG	Nipsnap homolog 3B OS=Sus scrofa OX=9823 GN=NIPSNAP3B PE=1 SV=1	28495	6	1	0	0	0	0	0	0	0	0	0	10	7	0
F1S770|F1S770_PIG	Uncharacterized protein OS=Sus scrofa OX=9823 GN=MROH7 PE=4 SV=3	120244	7	7	4	10	0	3	11	0	2	6	0	0	0	0
F1SN25|F1SN25_PIG	Tripartite motif containing 69 OS=Sus scrofa OX=9823 GN=TRIM69 PE=4 SV=2	57466	7	7	7	8	9	0	1	4	0	3	1	0	0	0
F1RKW8|F1RKW8_PIG	Proteasome 26S subunit non-ATPase 11 OS=Sus scrofa OX=9823 GN=PSMD11 PE=1 SV=2	47322	8	8	5	5	3	0	2	0	0	2	0	1	3	0
F1RMM7|F1RMM7_PIG	NLR family pyrin domain containing 9 OS=Sus scrofa OX=9823 GN=NLRP9 PE=4 SV=3	113806	6	6	0	0	0	0	0	0	0	0	0	7	27	0
F1RL41|F1RL41_PIG	Beta-ureidopropionase 1 OS=Sus scrofa OX=9823 GN=UPB1 PE=1 SV=1	42957	6	6	0	0	0	0	0	0	0	0	0	10	19	0
F1SRB9|F1SRB9_PIG	Uncharacterized protein OS=Sus scrofa OX=9823 GN=ST13 PE=1 SV=1	41434	7	7	0	0	8	0	0	0	0	0	0	3	0	1
A0A287A4D1|A0A287A4D1_PIG	IQ motif containing F5 OS=Sus scrofa OX=9823 GN=IQCF5 PE=4 SV=1	17822	6	4	4	17	1	5	18	3	5	13	3	0	3	0
A0A287A1V9|A0A287A1V9_PIG	Dehydrogenase/reductase 7B OS=Sus scrofa OX=9823 GN=DHRS7B PE=3 SV=1	33138	5	5	1	3	2	1	2	0	0	0	0	3	3	0
F1RU33|F1RU33_PIG	Uncharacterized protein OS=Sus scrofa OX=9823 GN=BANF1 PE=1 SV=1	10045	6	6	0	2	16	1	2	33	10	16	37	0	1	2
A0A287ALA1|A0A287ALA1_PIG	Uncharacterized protein OS=Sus scrofa OX=9823 GN=LOC100621494 PE=3 SV=1	41951	4	4	0	9	0	3	5	0	2	7	0	0	0	0
F1RZP8|F1RZP8_PIG	Peptidylprolyl isomerase like 6 OS=Sus scrofa OX=9823 GN=PPIL6 PE=4 SV=1	34907	4	4	1	0	2	4	6	0	5	5	0	0	0	0
F1SL58|F1SL58_PIG	Dynactin subunit 2 OS=Sus scrofa OX=9823 GN=DCTN2 PE=1 SV=3	44504	5	5	2	1	9	0	0	0	0	0	0	0	2	0
F1S335|F1S335_PIG	Cilia and flagella associated protein 69 OS=Sus scrofa OX=9823 GN=CFAP69 PE=4 SV=3	99887	5	5	1	0	0	0	0	0	0	0	0	0	0	0
A0A287BM71|A0A287BM71_PIG	Cilia and flagella associated protein 69 OS=Sus scrofa OX=9823 GN=CFAP69 PE=4 SV=1	106177	5	5	1	0	8	0	0	0	0	0	0	0	0	0
F1SLU6|F1SLU6_PIG	Ubiquitin carboxyl-terminal hydrolase OS=Sus scrofa OX=9823 GN=USP5 PE=1 SV=3	95903	6	6	3	16	4	4	10	0	2	7	0	1	3	0
I3LLQ8|I3LLQ8_PIG	AFG3 like matrix AAA peptidase subunit 2 OS=Sus scrofa OX=9823 GN=AFG3L2 PE=1 SV=2	87616	7	7	0	1	4	0	1	0	0	0	0	1	2	1
A0A287BRY0|A0A287BRY0_PIG	Tropomyosin alpha-1 chain OS=Sus scrofa OX=9823 GN=TPM1 PE=1 SV=1	28717	5	1	0	0	0	0	0	0	0	0	0	5	0	0
F1RP34|F1RP34_PIG	NAD(P)H-hydrate epimerase OS=Sus scrofa OX=9823 GN=APOA1BP PE=1 SV=2	31480	8	8	0	0	9	0	0	0	0	0	0	6	3	0
A0A286ZN31|A0A286ZN31_PIG	Sad1 and UNC84 domain containing 2 OS=Sus scrofa OX=9823 GN=SUN2 PE=1 SV=1	78113	6	6	0	0	0	0	0	0	0	0	0	5	6	0
A0A0B8RT38|A0A0B8RT38_PIG	Sad1 and UNC84 domain containing 2 OS=Sus scrofa domesticus OX=9825 GN=SUN2 PE=4 SV=1	81595	6	6	0	0	0	0	0	0	0	0	0	5	0	0
F1SNX8|F1SNX8_PIG	Sad1 and UNC84 domain containing 2 OS=Sus scrofa OX=9823 GN=SUN2 PE=1 SV=3	81595	6	6	0	0	0	0	0	0	0	0	0	5	0	0
A0A287AJH2|A0A287AJH2_PIG	IQ motif and ankyrin repeat containing 1 OS=Sus scrofa OX=9823 GN=IQANK1 PE=4 SV=1	63099	5	5	4	1	0	1	0	0	1	1	0	0	0	0
F1S1G0|F1S1G0_PIG	Eukaryotic translation initiation factor 3 subunit E OS=Sus scrofa OX=9823 GN=EIF3E PE=1 SV=3	52221	4	4	4	1	0	3	4	3	2	5	2	0	1	0
F1RSC3|F1RSC3_PIG	Carboxypeptidase OS=Sus scrofa OX=9823 GN=SCPEP1 PE=1 SV=3	51219	4	4	2	1	0	5	1	0	4	1	0	0	0	0
A0A286ZPM8|A0A286ZPM8_PIG	Carboxypeptidase OS=Sus scrofa OX=9823 GN=SCPEP1 PE=1 SV=1	51461	4	4	2	0	0	5	0	0	4	0	0	0	0	0
V5PZZ6|V5PZZ6_PIG	Arrestin domain-containing 5 OS=Sus scrofa OX=9823 GN=ARRDC5 PE=2 SV=1	37585	7	7	7	9	5	0	1	9	1	1	3	0	0	0
A0A287AK64|A0A287AK64_PIG	Cilia and flagella associated protein 54 OS=Sus scrofa OX=9823 GN=CFAP54 PE=4 SV=1	349253	7	7	1	0	0	0	0	0	0	0	0	0	5	0
F1SC47|F1SC47_PIG	Delta-1-pyrroline-5-carboxylate synthase OS=Sus scrofa OX=9823 GN=ALDH18A1 PE=1 SV=1	87086	4	4	0	1	0	0	0	0	0	0	0	1	0	0
A0A287BMY7|A0A287BMY7_PIG	Acyl-CoA synthetase long chain family member 1 OS=Sus scrofa OX=9823 GN=ACSL1 PE=1 SV=1	78033	6	3	1	6	0	2	4	0	1	2	0	1	3	0
A0A0B8S0C6|A0A0B8S0C6_PIG	Acyl-CoA synthetase long-chain family member 1 OS=Sus scrofa domesticus OX=9825 GN=ACSL1 PE=4 SV=1	78033	6	3	1	0	0	2	0	0	1	0	0	1	0	0
A0A287AZV4|A0A287AZV4_PIG	S-(hydroxymethyl)glutathione dehydrogenase OS=Sus scrofa OX=9823 GN=ADH5 PE=1 SV=1	38801	5	5	1	0	3	0	0	0	0	0	0	5	0	0
A0A0K1TQS4|A0A0K1TQS4_PIG	S-(hydroxymethyl)glutathione dehydrogenase OS=Sus scrofa OX=9823 GN=ADH5 PE=2 SV=1	39689	5	5	1	0	3	0	0	0	0	0	0	5	0	0
F1S0C1|F1S0C1_PIG	S-(hydroxymethyl)glutathione dehydrogenase OS=Sus scrofa OX=9823 GN=ADH5 PE=3 SV=2	40871	5	5	1	1	3	0	1	0	0	0	0	5	9	0
I3L6T1|I3L6T1_PIG	Leucine rich repeats and death domain containing 1 OS=Sus scrofa OX=9823 GN=LRRD1 PE=4 SV=2	97005	9	9	1	0	10	0	0	0	0	0	0	0	0	0
A0A287A597|A0A287A597_PIG	Leucine rich repeats and death domain containing 1 OS=Sus scrofa OX=9823 GN=LRRD1 PE=4 SV=1	96212	9	9	1	0	0	0	0	0	0	0	0	0	0	0
I3L638|I3L638_PIG	Vitronectin OS=Sus scrofa OX=9823 GN=VTN PE=1 SV=2	52426	5	5	0	0	0	0	0	0	0	0	0	6	0	0
sp|P48819|VTNC_PIG	Vitronectin OS=Sus scrofa OX=9823 GN=VTN PE=1 SV=1	52572	5	5	0	0	0	0	0	0	0	0	0	6	0	0
A0A286ZXX4|A0A286ZXX4_PIG	Proteasome assembly chaperone 2 OS=Sus scrofa OX=9823 GN=PSMG2 PE=1 SV=1	29122	5	5	5	14	1	1	7	4	3	10	1	0	0	0
M3UZ83|M3UZ83_PIG	Proteasome assembly chaperone 2 OS=Sus scrofa OX=9823 GN=PSMG2 PE=2 SV=1	29118	5	5	5	0	1	1	0	4	3	0	1	0	0	0
I3LDV0|I3LDV0_PIG	DEAD-box helicase 3 Y-linked OS=Sus scrofa OX=9823 GN=DDX3Y PE=3 SV=2	74426	6	1	3	0	1	4	0	1	4	0	2	3	0	0
A0A1B2TT47|A0A1B2TT47_PIG	Y-linked DEAD box polypeptide 3 OS=Sus scrofa OX=9823 GN=DDX3Y PE=2 SV=1	73341	6	1	3	0	1	4	0	1	4	0	2	3	0	0
A0A287BG53|A0A287BG53_PIG	DEAD-box helicase 3 Y-linked OS=Sus scrofa OX=9823 GN=DDX3Y PE=3 SV=1	61789	6	1	3	0	1	4	0	1	4	0	2	3	0	0
A0A286ZVA8|A0A286ZVA8_PIG	Tripartite motif containing 28 OS=Sus scrofa OX=9823 GN=TRIM28 PE=4 SV=1	91796	4	4	2	0	0	3	0	0	2	0	0	0	0	0
I3L6D2|I3L6D2_PIG	Ras-related protein Rab-1A OS=Sus scrofa OX=9823 GN=RAB1A PE=1 SV=2	21738	9	5	0	3	0	3	3	0	0	2	0	8	7	0
F2Z5U4|F2Z5U4_PIG	Ras-related protein Rab-1A OS=Sus scrofa OX=9823 GN=RAB1A PE=1 SV=2	22678	9	5	0	0	0	3	0	0	0	0	0	8	0	0
A0A287BD00|A0A287BD00_PIG	Ras-related protein Rab-1A OS=Sus scrofa OX=9823 GN=RAB1A PE=1 SV=1	24430	9	5	0	0	0	3	0	0	0	0	0	8	0	0
I3L677|I3L677_PIG	Glucose-6-phosphate 1-dehydrogenase OS=Sus scrofa OX=9823 GN=G6PD PE=1 SV=2	63351	5	1	0	0	2	0	0	0	0	0	0	5	0	0
A0A286ZY10|A0A286ZY10_PIG	Glucose-6-phosphate 1-dehydrogenase OS=Sus scrofa OX=9823 GN=G6PD PE=1 SV=1	59238	5	1	0	0	2	0	0	0	0	0	0	5	0	0
A0A286ZIW5|A0A286ZIW5_PIG	IlvB acetolactate synthase like OS=Sus scrofa OX=9823 GN=ILVBL PE=1 SV=1	67773	4	4	2	3	0	2	4	0	2	2	0	3	2	0
F1SAN6|F1SAN6_PIG	IlvB acetolactate synthase like OS=Sus scrofa OX=9823 GN=ILVBL PE=1 SV=3	68563	4	4	2	0	0	2	0	0	2	0	0	3	0	0
I3LJJ8|I3LJJ8_PIG	PDZ domain containing 1 OS=Sus scrofa OX=9823 GN=PDZK1 PE=1 SV=2	58160	6	6	0	0	0	0	0	0	0	0	0	7	31	11
I3LCA3|I3LCA3_PIG	PDZ domain containing 1 OS=Sus scrofa OX=9823 GN=PDZK1 PE=1 SV=2	56149	6	6	0	0	0	0	0	0	0	0	0	7	0	11
F1SDD5|F1SDD5_PIG	PDZ domain containing 1 OS=Sus scrofa OX=9823 GN=PDZK1 PE=1 SV=3	56750	6	6	0	0	0	0	0	0	0	0	0	7	0	11
A0A287BAJ3|A0A287BAJ3_PIG	PDZ domain containing 1 OS=Sus scrofa OX=9823 GN=PDZK1 PE=1 SV=1	53465	6	6	0	0	0	0	0	0	0	0	0	7	0	0
B5ATG0|B5ATG0_PIG	Clathrin light chain (Fragment) OS=Sus scrofa OX=9823 PE=2 SV=1	18241	5	5	0	0	2	0	0	0	0	0	0	10	0	8
A0A286ZLL7|A0A286ZLL7_PIG	Clathrin light chain OS=Sus scrofa OX=9823 GN=CLTA PE=3 SV=1	25252	5	5	0	0	0	0	0	0	0	0	0	10	0	0
A0A287A682|A0A287A682_PIG	Clathrin light chain OS=Sus scrofa OX=9823 GN=CLTA PE=3 SV=1	26652	5	5	0	0	0	0	0	0	0	0	0	10	0	0
A0A287BFJ2|A0A287BFJ2_PIG	Clathrin light chain OS=Sus scrofa OX=9823 GN=CLTA PE=3 SV=1	23237	5	5	0	0	2	0	0	0	0	0	0	10	0	8
A0A287BPU5|A0A287BPU5_PIG	Clathrin light chain OS=Sus scrofa OX=9823 GN=CLTA PE=3 SV=1	24569	5	5	0	0	0	0	0	0	0	0	0	10	0	0
F1SK69|F1SK69_PIG	Uncharacterized protein OS=Sus scrofa OX=9823 GN=LOC100738961 PE=4 SV=2	28518	3	3	4	4	0	5	2	0	3	0	0	0	0	0
I3LK91|I3LK91_PIG	Leucine rich repeat containing 34 OS=Sus scrofa OX=9823 GN=LRRC34 PE=4 SV=2	46862	4	4	0	0	5	2	0	3	1	0	2	0	0	0
A0A286ZIK3|A0A286ZIK3_PIG	Leucine rich repeat containing 34 OS=Sus scrofa OX=9823 GN=LRRC34 PE=4 SV=1	49979	4	4	0	0	5	2	0	3	1	4	2	0	0	0
F1RNN0|F1RNN0_PIG	Vacuolar protein sorting-associated protein 29 OS=Sus scrofa OX=9823 GN=VPS29 PE=1 SV=3	20493	4	4	1	1	0	1	1	0	2	1	0	0	2	0
A0A287B6U5|A0A287B6U5_PIG	Vacuolar protein sorting-associated protein 29 OS=Sus scrofa OX=9823 GN=VPS29 PE=1 SV=1	20917	4	4	1	0	0	1	0	0	2	0	0	0	0	0
A5GFU0|A5GFU0_PIG	GNAS complex locus OS=Sus scrofa OX=9823 GN=GNAS PE=1 SV=1	107476	4	2	2	0	0	2	0	1	1	0	0	2	0	0
K7GSD2|K7GSD2_PIG	Guanine nucleotide-binding protein G(s) subunit alpha OS=Sus scrofa OX=9823 GN=GNAS PE=1 SV=1	105990	4	2	2	0	0	2	0	1	1	0	0	2	0	0
A5GFU2|A5GFU2_PIG	GNAS complex locus (Fragment) OS=Sus scrofa OX=9823 GN=GNAS PE=4 SV=1	69390	4	2	2	1	0	2	1	1	1	1	0	2	3	0
A5GFU5|A5GFU5_PIG	GNAS complex locus OS=Sus scrofa OX=9823 GN=GNAS PE=4 SV=1	45665	4	2	2	0	0	2	0	0	1	0	0	2	0	0
A5GFU7|A5GFU7_PIG	GNAS complex locus OS=Sus scrofa OX=9823 GN=GNAS PE=1 SV=1	45752	4	2	2	0	0	2	0	0	1	0	0	2	0	0
A5GFU6|A5GFU6_PIG	GNAS complex locus OS=Sus scrofa OX=9823 GN=GNAS PE=4 SV=1	44179	4	2	2	0	0	2	0	0	1	0	0	2	0	0
sp|P29797|GNAS_PIG	Guanine nucleotide-binding protein G(s) subunit alpha OS=Sus scrofa OX=9823 GN=GNAS PE=2 SV=1	46477	4	2	2	0	0	2	0	0	1	0	0	2	0	0
A0A287B2U6|A0A287B2U6_PIG	Synaptosomal-associated protein OS=Sus scrofa OX=9823 GN=SNAP23 PE=1 SV=1	23258	6	6	3	2	8	0	0	0	0	0	0	5	6	1
A0A287AHK8|A0A287AHK8_PIG	Synaptosomal-associated protein OS=Sus scrofa OX=9823 GN=SNAP23 PE=1 SV=1	24503	6	6	3	0	8	0	0	0	0	0	0	5	0	1
I3L6U9|I3L6U9_PIG	Guanine nucleotide-binding protein subunit alpha-11 OS=Sus scrofa OX=9823 GN=GNA11 PE=4 SV=1	42080	4	1	0	0	0	3	0	0	3	0	0	0	0	0
A5A756|A5A756_PIG	Guanine nucleotide-binding protein alpha-11 (Fragment) OS=Sus scrofa OX=9823 GN=GNA11 PE=2 SV=1	35782	4	1	0	0	0	3	0	0	3	0	0	0	0	0
sp|Q2XSV9|GNA11_PIG	Guanine nucleotide-binding protein subunit alpha-11 OS=Sus scrofa OX=9823 GN=GNA11 PE=2 SV=2	42064	4	1	0	0	0	3	0	0	3	0	0	0	0	0
F1SUE3|F1SUE3_PIG	Pyrophosphatase (inorganic) 1 OS=Sus scrofa OX=9823 GN=PPA1 PE=1 SV=2	32790	6	6	1	3	0	0	2	1	0	0	0	5	14	0
A0A287A2Q7|A0A287A2Q7_PIG	Collagen type II alpha 1 chain OS=Sus scrofa OX=9823 GN=COL2A1 PE=1 SV=1	134295	4	4	0	0	0	0	0	0	0	0	0	5	0	8
A0A286ZWS8|A0A286ZWS8_PIG	Collagen type II alpha 1 chain OS=Sus scrofa OX=9823 GN=COL2A1 PE=1 SV=1	141682	4	4	0	0	0	0	0	0	0	0	0	5	0	8
D0G778|D0G778_PIG	Macrophage migration inhibitory factor (Fragment) OS=Sus scrofa OX=9823 GN=MIF PE=2 SV=1	11874	5	5	1	0	0	0	0	0	0	0	0	3	4	0
sp|P80928|MIF_PIG	Macrophage migration inhibitory factor OS=Sus scrofa OX=9823 GN=MIF PE=1 SV=3	12451	5	5	1	0	5	0	0	0	0	0	0	3	0	4
Q56P20|Q56P20_PIG	ADP-ribosylation factor 4 OS=Sus scrofa OX=9823 GN=ARF4 PE=1 SV=1	20486	5	2	2	6	0	4	8	0	1	5	0	4	10	0
A0A287AL05|A0A287AL05_PIG	Eukaryotic translation initiation factor 3 subunit L OS=Sus scrofa OX=9823 GN=EIF3L PE=1 SV=1	74009	4	4	0	2	0	1	5	0	2	4	0	0	2	0
F1SKN5|F1SKN5_PIG	Eukaryotic translation initiation factor 3 subunit L OS=Sus scrofa OX=9823 GN=EIF3L PE=1 SV=3	62818	4	4	0	0	0	1	0	0	2	0	0	0	0	0
A0A287BK74|A0A287BK74_PIG	Eukaryotic translation initiation factor 3 subunit L OS=Sus scrofa OX=9823 GN=EIF3L PE=1 SV=1	66757	4	4	0	0	0	1	0	0	2	0	0	0	0	0
A0A287BKR9|A0A287BKR9_PIG	Uncharacterized protein OS=Sus scrofa OX=9823 GN=LOC100157017 PE=1 SV=1	35858	4	4	3	0	6	2	0	0	1	0	0	0	0	0
A0A286ZQ44|A0A286ZQ44_PIG	Dicarbonyl and L-xylulose reductase OS=Sus scrofa OX=9823 GN=DCXR PE=4 SV=1	25662	5	5	0	0	0	0	0	0	0	0	0	4	7	0
A0A2C9F397|A0A2C9F397_PIG	Triokinase/FMN cyclase OS=Sus scrofa OX=9823 GN=TKFC PE=1 SV=1	59106	6	6	1	2	17	0	0	0	0	0	0	0	0	0
I3LTU6|I3LTU6_PIG	Histone deacetylase 11 OS=Sus scrofa OX=9823 GN=HDAC11 PE=4 SV=2	39118	6	6	2	4	2	2	2	7	1	4	4	1	0	0
A0A286ZRL7|A0A286ZRL7_PIG	DExD-box helicase 39A OS=Sus scrofa OX=9823 GN=DDX39A PE=4 SV=1	30884	3	1	4	0	0	2	0	0	2	0	0	1	0	0
F1SCH3|F1SCH3_PIG	DExD-box helicase 39A OS=Sus scrofa OX=9823 GN=DDX39A PE=4 SV=3	30516	3	1	4	19	0	2	9	0	2	14	0	1	1	0
F1RYX0|F1RYX0_PIG	Methylenetetrahydrofolate dehydrogenase (NADP+ dependent) 2 like OS=Sus scrofa OX=9823 GN=MTHFD2L PE=3 SV=3	34738	5	5	1	0	0	0	0	0	0	0	0	0	0	0
F1RJR9|F1RJR9_PIG	PDZ binding kinase OS=Sus scrofa OX=9823 GN=PBK PE=1 SV=3	36187	4	4	1	0	0	1	0	0	3	0	0	0	0	0
A0A287AZQ6|A0A287AZQ6_PIG	Uncharacterized protein OS=Sus scrofa OX=9823 GN=AK9 PE=4 SV=1	123838	6	6	0	0	8	0	0	0	0	0	0	0	0	0
F1S0X3|F1S0X3_PIG	Fibrinogen C domain containing 1 OS=Sus scrofa OX=9823 GN=FIBCD1 PE=4 SV=1	50664	6	6	1	0	0	4	0	0	4	0	0	0	0	0
B3F0B7|B3F0B7_PIG	Cellular retinoic acid-binding protein 1 OS=Sus scrofa OX=9823 GN=CRABP1 PE=1 SV=1	15566	3	3	1	4	0	3	2	0	1	3	0	0	0	0
A0A287A238|A0A287A238_PIG	Uncharacterized protein OS=Sus scrofa OX=9823 GN=CRABP1 PE=1 SV=1	12556	3	3	1	0	0	3	0	0	1	0	0	0	0	0
F1SQA9|F1SQA9_PIG	SEC13 homolog nuclear pore and COPII coat complex component OS=Sus scrofa OX=9823 GN=SEC13 PE=1 SV=3	35386	4	4	5	2	1	2	5	2	1	0	0	3	2	0
A4L2Z4|A4L2Z4_PIG	G protein subunit alpha 14 OS=Sus scrofa OX=9823 GN=GNA14 PE=2 SV=1	41514	4	1	0	3	0	3	10	0	4	5	0	0	0	0
A0A288CG44|A0A288CG44_PIG	G protein subunit alpha 14 OS=Sus scrofa OX=9823 GN=GNA14 PE=4 SV=1	37028	4	1	0	0	0	3	0	0	4	0	0	0	0	0
D0G6X4|D0G6X4_PIG	Farnesyl diphosphate synthase OS=Sus scrofa OX=9823 GN=FDPS PE=1 SV=1	48600	5	5	1	1	6	0	0	1	0	0	0	6	8	0
A0A287AKB5|A0A287AKB5_PIG	Creatine kinase mitochondrial 2 OS=Sus scrofa OX=9823 GN=CKMT2 PE=1 SV=1	44598	6	1	1	0	0	5	0	0	0	0	0	8	0	0
Q2HYU1|Q2HYU1_PIG	Creatine kinase mitochondrial 2 OS=Sus scrofa OX=9823 GN=CKMT2 PE=1 SV=1	47478	6	1	1	0	0	5	0	0	0	0	0	8	0	0
A0A286ZQI3|A0A286ZQI3_PIG	Creatine kinase mitochondrial 2 OS=Sus scrofa OX=9823 GN=CKMT2 PE=1 SV=1	47368	6	1	1	0	0	5	0	0	0	0	0	8	0	0
sp|P79384|PCCB_PIG	Propionyl-CoA carboxylase beta chain mitochondrial OS=Sus scrofa OX=9823 GN=PCCB PE=2 SV=1	58590	5	5	0	0	7	0	0	0	0	0	0	4	5	0
A0A287AS29|A0A287AS29_PIG	Nucleoside diphosphate kinase OS=Sus scrofa OX=9823 GN=NME1 PE=1 SV=1	17109	4	2	2	1	9	2	0	3	0	2	4	4	12	0
A0A287AD92|A0A287AD92_PIG	GrpE protein homolog OS=Sus scrofa OX=9823 GN=GRPEL1 PE=1 SV=1	23812	4	4	0	0	2	0	0	0	0	0	0	8	5	1
F1RZR6|F1RZR6_PIG	CutA divalent cation tolerance homolog OS=Sus scrofa OX=9823 GN=CUTA PE=1 SV=2	21671	5	5	0	0	5	0	0	0	0	0	0	4	0	2
A0A287ADB5|A0A287ADB5_PIG	CutA divalent cation tolerance homolog OS=Sus scrofa OX=9823 GN=CUTA PE=1 SV=1	18922	5	5	0	0	5	0	0	0	0	0	0	4	5	2
A0A287BCM2|A0A287BCM2_PIG	CutA divalent cation tolerance homolog OS=Sus scrofa OX=9823 GN=CUTA PE=1 SV=1	19881	5	5	0	0	5	0	0	0	0	0	0	4	0	2
I3LMP8|I3LMP8_PIG	Uncharacterized protein OS=Sus scrofa OX=9823 GN=RMDN2 PE=4 SV=2	54481	4	4	4	3	0	0	0	0	0	0	0	0	0	0
F1S4R1|F1S4R1_PIG	Uncharacterized protein OS=Sus scrofa OX=9823 GN=RMDN2 PE=4 SV=3	49749	4	4	4	0	0	0	0	0	0	0	0	0	0	0
A0A287BQ54|A0A287BQ54_PIG	Uncharacterized protein OS=Sus scrofa OX=9823 GN=RMDN2 PE=4 SV=1	46386	4	4	4	0	0	0	0	0	0	0	0	0	0	0
A0A287BPB5|A0A287BPB5_PIG	Uncharacterized protein OS=Sus scrofa OX=9823 GN=RMDN2 PE=4 SV=1	48803	4	4	4	0	0	0	0	0	0	0	0	0	0	0
sp|Q02038|NEUL_PIG	Neurolysin mitochondrial OS=Sus scrofa OX=9823 GN=NLN PE=1 SV=1	80757	5	5	0	0	0	0	0	0	0	0	0	4	0	0
I3L946|I3L946_PIG	Neurolysin mitochondrial OS=Sus scrofa OX=9823 GN=NLN PE=1 SV=2	83414	5	5	0	0	0	0	0	0	0	0	0	4	0	0
F1SRN6|F1SRN6_PIG	Neurolysin mitochondrial OS=Sus scrofa OX=9823 GN=NLN PE=1 SV=2	85111	5	5	0	1	0	0	0	0	0	0	0	4	10	0
A0A287ATS6|A0A287ATS6_PIG	Neurolysin mitochondrial OS=Sus scrofa OX=9823 GN=NLN PE=1 SV=1	76699	5	5	0	0	0	0	0	0	0	0	0	4	0	0
F2Z5I8|F2Z5I8_PIG	Uncharacterized protein OS=Sus scrofa OX=9823 GN=RAB8A PE=1 SV=2	26631	6	3	0	0	3	2	0	0	1	0	0	3	0	0
F1S340|F1S340_PIG	Sorcin OS=Sus scrofa OX=9823 GN=SRI PE=1 SV=1	21733	5	5	1	0	1	2	0	1	4	0	0	2	0	0
A0A287AR67|A0A287AR67_PIG	Sorcin OS=Sus scrofa OX=9823 GN=SRI PE=1 SV=1	20345	5	5	1	4	1	2	3	1	4	3	0	2	1	0
E3VWG5|E3VWG5_PIG	p58IPK OS=Sus scrofa OX=9823 PE=2 SV=1	57725	6	6	0	1	0	0	1	0	0	0	0	6	14	10
I3LQX1|I3LQX1_PIG	Uncharacterized protein OS=Sus scrofa OX=9823 GN=CCDC96 PE=4 SV=2	63193	5	5	0	0	9	0	0	0	0	1	0	0	0	0
Q52NJ5|Q52NJ5_PIG	ADP ribosylation factor like GTPase 1 OS=Sus scrofa OX=9823 GN=ARL1 PE=1 SV=1	20428	4	4	0	10	1	6	4	2	1	2	4	0	2	0
F1SUG4|F1SUG4_PIG	Uncharacterized protein OS=Sus scrofa OX=9823 GN=ELOB PE=1 SV=1	13170	4	4	0	2	2	3	1	0	2	0	0	1	0	0
F1RXA6|F1RXA6_PIG	Gasdermin A OS=Sus scrofa OX=9823 GN=GSDMA PE=4 SV=2	48696	4	4	0	0	0	0	0	0	0	0	0	6	0	0
F1SHL3|F1SHL3_PIG	Protein transport protein SEC23 OS=Sus scrofa OX=9823 GN=SEC23A PE=1 SV=1	86185	5	5	2	4	0	1	4	0	0	1	0	1	5	0
F1RGK7|F1RGK7_PIG	Chromosome 1 open reading frame 189 OS=Sus scrofa OX=9823 GN=C1orf189 PE=4 SV=2	12071	4	4	0	0	4	3	0	5	5	0	7	0	0	0
F1SPP8|F1SPP8_PIG	Uncharacterized protein OS=Sus scrofa OX=9823 GN=CKAP4 PE=1 SV=3	64538	5	5	0	0	0	0	0	0	0	0	0	4	9	0
F1RJM8|F1RJM8_PIG	Abhydrolase domain containing 11 OS=Sus scrofa OX=9823 GN=ABHD11 PE=1 SV=2	33049	5	5	0	0	6	0	0	0	0	0	0	1	0	2
F4ZS18|F4ZS18_PIG	X-linked DEAD (Asp-Glu-Ala-Asp) box polypeptide 3 OS=Sus scrofa OX=9823 GN=DDX3X PE=2 SV=1	73277	6	1	2	0	0	2	0	0	3	0	0	3	0	0
A0A287AVQ1|A0A287AVQ1_PIG	DEAD-box helicase 3 X-linked OS=Sus scrofa OX=9823 GN=DDX3X PE=1 SV=1	72947	6	1	2	0	0	2	0	0	3	0	0	3	0	0
F1RX16|F1RX16_PIG	DEAD-box helicase 3 X-linked OS=Sus scrofa OX=9823 GN=DDX3X PE=1 SV=3	73242	6	1	2	0	0	2	0	0	3	0	0	3	0	0
A0A287AHT1|A0A287AHT1_PIG	Pyruvate dehydrogenase kinase 3 OS=Sus scrofa OX=9823 GN=PDK3 PE=1 SV=1	47966	6	6	1	0	5	0	0	0	0	0	0	4	0	0
A0A0B8RVM3|A0A0B8RVM3_PIG	Pyruvate dehydrogenase kinase isozyme 3 OS=Sus scrofa domesticus OX=9825 GN=PDK3 PE=4 SV=1	47966	6	6	1	0	5	0	0	0	0	0	0	4	0	0
sp|P60662|MYL6_PIG	Myosin light polypeptide 6 OS=Sus scrofa OX=9823 GN=MYL6 PE=1 SV=2	16930	4	4	1	4	0	0	3	0	2	1	0	3	11	1
A0A2C9F331|A0A2C9F331_PIG	Myosin light polypeptide 6 OS=Sus scrofa OX=9823 GN=MYL6 PE=1 SV=1	17929	4	4	1	0	0	0	0	0	2	0	0	3	0	1
F1SBS4|F1SBS4_PIG	Complement C3 OS=Sus scrofa OX=9823 GN=C3 PE=1 SV=3	187034	5	5	0	0	0	2	0	0	0	0	0	0	0	0
I3LTB8|I3LTB8_PIG	Complement C3 OS=Sus scrofa OX=9823 GN=C3 PE=1 SV=2	185276	5	5	0	0	0	2	0	0	0	0	0	0	0	0
F2Z4Y1|F2Z4Y1_PIG	Tyrosine 3-monooxygenase/tryptophan 5-monooxygenase activation protein eta OS=Sus scrofa OX=9823 GN=YWHAH PE=1 SV=1	28212	9	6	0	0	0	0	0	0	0	0	0	9	16	0
I3LQ76|I3LQ76_PIG	Uncharacterized protein OS=Sus scrofa OX=9823 GN=UPTI PE=4 SV=2	13258	3	3	0	0	0	0	0	0	2	0	0	17	0	0
A0A287AFS1|A0A287AFS1_PIG	Uncharacterized protein OS=Sus scrofa OX=9823 GN=UPTI PE=4 SV=1	11116	3	3	0	0	0	0	0	0	2	0	0	17	0	0
I3LBB2|I3LBB2_PIG	Vacuolar protein sorting-associated protein 35 OS=Sus scrofa OX=9823 GN=VPS35 PE=1 SV=2	91693	5	5	2	16	0	0	8	0	0	7	0	0	10	0
A0A286ZU91|A0A286ZU91_PIG	Vacuolar protein sorting-associated protein 35 OS=Sus scrofa OX=9823 GN=VPS35 PE=1 SV=1	80152	5	5	2	0	0	0	0	0	0	0	0	0	0	0
A7TX80|A7TX80_PIG	COP9 constitutive photomorphogenic-like subunit 5 OS=Sus scrofa OX=9823 GN=COPS5 PE=2 SV=1	37576	3	3	2	4	0	0	1	0	0	0	0	3	6	0
F2Z540|F2Z540_PIG	COP9 signalosome subunit 5 OS=Sus scrofa OX=9823 GN=COPS5 PE=4 SV=2	47016	3	3	2	0	0	0	0	0	0	0	0	3	0	0
A0A287A976|A0A287A976_PIG	COP9 signalosome subunit 5 OS=Sus scrofa OX=9823 GN=COPS5 PE=1 SV=1	38604	3	3	2	0	0	0	0	0	0	0	0	3	0	0
K4NAL9|K4NAL9_PIG	C-Jun activation domain binding protein-1 OS=Sus scrofa OX=9823 GN=JAB1 PE=2 SV=1	37579	3	3	2	0	0	0	0	0	0	0	0	3	0	0
F1SSA6|F1SSA6_PIG	Uncharacterized protein OS=Sus scrofa OX=9823 PE=1 SV=3	110716	5	3	1	4	0	0	2	0	0	0	0	1	17	0
A0A287BNK7|A0A287BNK7_PIG	Plectin OS=Sus scrofa OX=9823 GN=PLEC PE=1 SV=1	514514	6	6	0	0	0	0	0	0	0	0	0	3	0	0
A0A287B217|A0A287B217_PIG	Plectin OS=Sus scrofa OX=9823 GN=PLEC PE=1 SV=1	514589	6	6	0	0	0	0	0	0	0	0	0	3	0	0
A0A287BN04|A0A287BN04_PIG	Plectin OS=Sus scrofa OX=9823 GN=PLEC PE=1 SV=1	515739	6	6	0	0	0	0	0	0	0	0	0	3	0	0
A0A287B0Y8|A0A287B0Y8_PIG	Plectin OS=Sus scrofa OX=9823 GN=PLEC PE=1 SV=1	515120	6	6	0	0	0	0	0	0	0	0	0	3	0	0
A0A287B2H9|A0A287B2H9_PIG	Plectin OS=Sus scrofa OX=9823 GN=PLEC PE=1 SV=1	516864	6	6	0	0	0	0	0	0	0	0	0	3	0	0
A0A287BSB3|A0A287BSB3_PIG	Plectin OS=Sus scrofa OX=9823 GN=PLEC PE=1 SV=1	517119	6	6	0	0	0	0	0	0	0	0	0	3	0	0
A0A287AYV2|A0A287AYV2_PIG	Plectin OS=Sus scrofa OX=9823 GN=PLEC PE=1 SV=1	585126	6	6	0	1	0	0	0	0	0	0	0	3	0	0
A0A287A8C7|A0A287A8C7_PIG	Plectin OS=Sus scrofa OX=9823 GN=PLEC PE=1 SV=1	590350	6	6	0	0	0	0	0	0	0	0	0	3	0	0
A0A287AA88|A0A287AA88_PIG	Plectin OS=Sus scrofa OX=9823 GN=PLEC PE=1 SV=1	598829	6	6	0	0	0	0	0	0	0	0	0	3	0	0
A0A287B9H1|A0A287B9H1_PIG	Plectin OS=Sus scrofa OX=9823 GN=PLEC PE=1 SV=1	607829	6	6	0	0	0	0	0	0	0	0	0	3	0	0
F1SQR7|F1SQR7_PIG	Histidine ammonia-lyase OS=Sus scrofa OX=9823 GN=HAL PE=1 SV=3	72270	8	8	0	0	0	0	0	0	0	0	0	8	0	0
A0A286ZND0|A0A286ZND0_PIG	Histidine ammonia-lyase OS=Sus scrofa OX=9823 GN=HAL PE=1 SV=1	68595	8	8	0	0	0	0	0	0	0	0	0	8	3	0
A0A287AA69|A0A287AA69_PIG	Chromosome 15 open reading frame 65 OS=Sus scrofa OX=9823 GN=C15orf65 PE=4 SV=1	13108	3	3	4	7	3	2	5	1	5	2	3	1	0	0
A0A287BMW6|A0A287BMW6_PIG	NADH:ubiquinone oxidoreductase subunit B11 OS=Sus scrofa OX=9823 GN=NDUFB11 PE=1 SV=1	17365	5	5	0	0	5	3	0	5	7	0	2	0	0	0
F2Z5B1|F2Z5B1_PIG	Leukocyte elastase inhibitor OS=Sus scrofa OX=9823 GN=SERPINB1 PE=1 SV=1	42571	5	4	0	0	0	0	0	0	0	0	0	5	11	0
sp|P80229|ILEU_PIG	Leukocyte elastase inhibitor OS=Sus scrofa OX=9823 GN=SERPINB1 PE=1 SV=1	42513	5	4	0	0	0	0	0	0	0	0	0	5	0	0
A0A287B7P2|A0A287B7P2_PIG	Leukocyte elastase inhibitor OS=Sus scrofa OX=9823 GN=SERPINB1 PE=1 SV=1	46476	5	4	0	0	0	0	0	0	0	0	0	5	0	0
A0A287ABB8|A0A287ABB8_PIG	Nipsnap homolog 2 OS=Sus scrofa OX=9823 GN=NIPSNAP2 PE=1 SV=1	33505	4	4	0	0	3	0	0	0	0	0	0	5	5	1
F1S430|F1S430_PIG	Pyruvate dehydrogenase phosphatase regulatory subunit OS=Sus scrofa OX=9823 GN=PDPR PE=1 SV=3	99340	3	3	0	0	2	0	0	0	0	0	0	3	1	0
A0A0B8RSF3|A0A0B8RSF3_PIG	Pyruvate dehydrogenase phosphatase regulatory subunit OS=Sus scrofa domesticus OX=9825 GN=PDPR PE=4 SV=1	99340	3	3	0	0	0	0	0	0	0	0	0	3	0	0
F1S0B9|F1S0B9_PIG	Eukaryotic translation initiation factor 4E OS=Sus scrofa OX=9823 GN=EIF4E PE=1 SV=1	25079	4	4	1	0	1	5	0	2	1	0	1	0	0	0
A0A0K1TQQ7|A0A0K1TQQ7_PIG	Carbonyl reductase 3 OS=Sus scrofa OX=9823 GN=CBR3 PE=2 SV=1	30596	6	5	1	7	9	1	4	7	0	3	2	3	2	0
A0A287BL83|A0A287BL83_PIG	Uncharacterized protein OS=Sus scrofa OX=9823 GN=LOC110256481 PE=1 SV=1	30568	6	5	1	0	9	1	0	7	0	0	2	3	0	0
I3LDX5|I3LDX5_PIG	Family with sequence similarity 170 member A OS=Sus scrofa OX=9823 GN=FAM170A PE=4 SV=2	32647	5	5	4	6	3	4	4	4	3	2	1	0	0	0
I3LHS7|I3LHS7_PIG	Coenzyme Q9 OS=Sus scrofa OX=9823 GN=COQ9 PE=1 SV=2	35417	4	4	0	0	2	0	0	0	0	0	0	4	8	2
sp|Q8MIR0|TDH_PIG	L-threonine 3-dehydrogenase mitochondrial OS=Sus scrofa OX=9823 GN=TDH PE=1 SV=1	41432	4	4	0	0	0	0	0	0	0	0	0	6	0	0
A0A287BFY9|A0A287BFY9_PIG	Lamin tail domain containing 2 OS=Sus scrofa OX=9823 GN=LMNTD2 PE=4 SV=1	61255	4	4	2	0	0	0	0	0	0	0	0	0	0	0
A0A286ZK88|A0A286ZK88_PIG	Dynactin subunit 5 OS=Sus scrofa OX=9823 GN=DCTN5 PE=1 SV=1	20127	4	4	1	2	2	2	2	4	3	5	2	0	0	0
A0A0B8RTC1|A0A0B8RTC1_PIG	Protein kinase C OS=Sus scrofa domesticus OX=9825 GN=PRKCQ PE=3 SV=1	81838	5	5	5	0	1	2	0	4	2	0	3	0	0	0
A0A287BIN7|A0A287BIN7_PIG	Protein kinase C OS=Sus scrofa OX=9823 GN=PRKCQ PE=3 SV=1	66947	5	5	5	0	1	2	0	4	2	0	3	0	0	0
F1RKB1|F1RKB1_PIG	IQ motif containing D OS=Sus scrofa OX=9823 GN=IQCD PE=4 SV=2	54393	6	6	1	0	4	0	0	0	3	0	0	0	0	0
F1RK77|F1RK77_PIG	Rogdi homolog OS=Sus scrofa OX=9823 GN=ROGDI PE=1 SV=2	28982	3	3	4	4	0	0	3	0	2	3	0	0	0	0
A0A286ZUL7|A0A286ZUL7_PIG	Rogdi homolog OS=Sus scrofa OX=9823 GN=ROGDI PE=1 SV=1	32381	3	3	4	0	0	0	0	0	2	0	0	0	0	0
B6EDE4|B6EDE4_PIG	NADH-ubiquinone oxidoreductase chain 2 OS=Sus scrofa OX=9823 GN=NADH2 PE=3 SV=1	39042	3	3	2	0	3	6	0	3	11	0	1	0	0	0
A0A343K6Q2|A0A343K6Q2_PIG	NADH-ubiquinone oxidoreductase chain 2 OS=Sus scrofa OX=9823 GN=ND2 PE=3 SV=1	39086	3	3	2	0	3	6	0	3	11	0	1	0	0	0
B9ZUU8|B9ZUU8_PIG	NADH-ubiquinone oxidoreductase chain 2 OS=Sus scrofa domesticus OX=9825 GN=ND2 PE=3 SV=1	39056	3	3	2	0	3	6	0	3	11	0	1	0	0	0
Q7IIC0|Q7IIC0_PIG	NADH-ubiquinone oxidoreductase chain 2 OS=Sus scrofa OX=9823 GN=NADH2 PE=3 SV=1	39056	3	3	2	0	3	6	0	3	11	0	1	0	0	0
sp|O79875|NU2M_PIG	NADH-ubiquinone oxidoreductase chain 2 OS=Sus scrofa OX=9823 GN=MT-ND2 PE=1 SV=2	39056	3	3	2	0	3	6	0	3	11	0	1	0	0	0
B6EDI3|B6EDI3_PIG	NADH-ubiquinone oxidoreductase chain 2 OS=Sus scrofa OX=9823 GN=NADH2 PE=3 SV=1	39044	3	3	2	0	3	6	0	3	11	0	1	0	0	0
B6EDS4|B6EDS4_PIG	NADH-ubiquinone oxidoreductase chain 2 OS=Sus scrofa OX=9823 GN=NADH2 PE=3 SV=1	39026	3	3	2	0	3	6	0	3	11	0	1	0	0	0
F1RWY7|F1RWY7_PIG	Uncharacterized protein OS=Sus scrofa OX=9823 GN=BPHL PE=1 SV=3	33278	4	4	0	0	7	0	0	0	0	0	0	3	3	0
F1RM59|F1RM59_PIG	Sodium/potassium-transporting ATPase subunit alpha OS=Sus scrofa OX=9823 GN=ATP4A PE=3 SV=3	114250	3	1	2	0	0	1	0	0	0	0	0	0	0	0
A0A287BRT7|A0A287BRT7_PIG	Signal peptidase complex catalytic subunit SEC11 OS=Sus scrofa OX=9823 GN=SEC11A PE=1 SV=1	20625	4	4	0	0	3	3	0	1	4	1	3	0	1	0
I3LF38|I3LF38_PIG	SEC11 homolog A signal peptidase complex subunit OS=Sus scrofa OX=9823 GN=SEC11A PE=1 SV=2	14893	4	4	0	0	0	3	0	0	4	0	0	0	0	0
A0A286ZXZ7|A0A286ZXZ7_PIG	WD repeat-containing protein 35 OS=Sus scrofa OX=9823 GN=WDR35 PE=4 SV=1	132302	6	6	6	12	0	2	5	0	1	2	0	0	0	0
A0A287ALZ5|A0A287ALZ5_PIG	WD repeat-containing protein 35 OS=Sus scrofa OX=9823 GN=WDR35 PE=4 SV=1	135798	6	6	6	0	0	2	0	0	1	0	0	0	0	0
F1SCU2|F1SCU2_PIG	WD repeat-containing protein 35 OS=Sus scrofa OX=9823 GN=WDR35 PE=4 SV=2	133942	6	6	6	0	0	2	0	0	1	0	0	0	0	0
F1RRJ4|F1RRJ4_PIG	Exportin 5 OS=Sus scrofa OX=9823 GN=XPO5 PE=1 SV=2	135794	7	7	7	31	0	1	28	0	0	19	0	0	0	0
F1RRK9|F1RRK9_PIG	Exportin 5 OS=Sus scrofa OX=9823 GN=XPO5 PE=1 SV=3	134792	7	7	7	0	0	1	0	0	0	0	0	0	0	0
A0A0B8RZ38|A0A0B8RZ38_PIG	Sperm associated antigen 9 OS=Sus scrofa domesticus OX=9825 GN=SPAG9 PE=4 SV=1	146089	4	4	1	1	0	0	1	0	0	0	0	0	0	0
A0A287BLH2|A0A287BLH2_PIG	Sperm associated antigen 9 OS=Sus scrofa OX=9823 GN=SPAG9 PE=1 SV=1	146089	4	4	1	0	0	0	0	0	0	0	0	0	0	0
A0A286ZJX9|A0A286ZJX9_PIG	Sperm associated antigen 9 OS=Sus scrofa OX=9823 GN=SPAG9 PE=1 SV=1	147953	4	4	1	0	0	0	0	0	0	0	0	0	0	0
F1SP56|F1SP56_PIG	Nipsnap homolog 3B OS=Sus scrofa OX=9823 GN=NIPSNAP3B PE=1 SV=3	28615	6	1	2	0	0	0	0	0	0	0	0	8	0	0
A0A287AFW6|A0A287AFW6_PIG	LEM domain containing 1 OS=Sus scrofa OX=9823 GN=LEMD1 PE=4 SV=1	11198	4	4	3	0	0	0	0	0	0	0	0	0	0	0
A0A287ATP0|A0A287ATP0_PIG	Heparan sulfate proteoglycan 2 OS=Sus scrofa OX=9823 GN=HSPG2 PE=1 SV=1	462912	4	4	0	0	0	2	0	0	1	0	0	0	0	0
A0A286ZHV7|A0A286ZHV7_PIG	Heparan sulfate proteoglycan 2 OS=Sus scrofa OX=9823 GN=HSPG2 PE=1 SV=1	451092	4	4	0	0	0	2	0	0	1	0	0	0	0	0
A0A287AF47|A0A287AF47_PIG	Heparan sulfate proteoglycan 2 OS=Sus scrofa OX=9823 GN=HSPG2 PE=1 SV=1	463559	4	4	0	0	0	2	0	0	1	0	0	0	0	0
F1SU03|F1SU03_PIG	Heparan sulfate proteoglycan 2 OS=Sus scrofa OX=9823 GN=HSPG2 PE=1 SV=3	461359	4	4	0	0	0	2	0	0	1	0	0	0	0	0
A0A287ALE1|A0A287ALE1_PIG	Dehydrogenase E1 and transketolase domain containing 1 OS=Sus scrofa OX=9823 GN=DHTKD1 PE=1 SV=1	102589	5	5	0	1	0	0	1	0	0	0	0	0	1	0
F1RUP6|F1RUP6_PIG	Dehydrogenase E1 and transketolase domain containing 1 OS=Sus scrofa OX=9823 GN=DHTKD1 PE=1 SV=3	90960	5	5	0	0	0	0	0	0	0	0	0	0	0	0
F1RGJ2|F1RGJ2_PIG	Catenin alpha 1 OS=Sus scrofa OX=9823 GN=CTNNA1 PE=1 SV=3	118231	3	2	0	0	0	0	0	0	0	0	0	3	0	0
A0A287AJ96|A0A287AJ96_PIG	Catenin alpha 1 OS=Sus scrofa OX=9823 GN=CTNNA1 PE=1 SV=1	106963	3	2	0	0	0	0	0	0	0	0	0	3	0	0
A0A287A049|A0A287A049_PIG	Uncharacterized protein OS=Sus scrofa OX=9823 GN=CFH PE=1 SV=1	131953	6	6	0	0	0	0	0	0	0	0	0	0	0	0
A0A286ZTN6|A0A286ZTN6_PIG	Uncharacterized protein OS=Sus scrofa OX=9823 GN=CFH PE=1 SV=1	131776	6	6	0	0	0	0	0	0	0	0	0	0	0	0
A0A287BIW9|A0A287BIW9_PIG	Coiled-coil domain containing 18 OS=Sus scrofa OX=9823 GN=CCDC18 PE=4 SV=1	169659	6	6	2	0	0	4	0	0	2	0	5	0	0	0
I3LKE7|I3LKE7_PIG	Coiled-coil domain containing 18 OS=Sus scrofa OX=9823 GN=CCDC18 PE=4 SV=2	161967	6	6	2	3	0	4	8	0	2	6	5	0	0	0
F1S325|F1S325_PIG	Putative hydroxypyruvate isomerase OS=Sus scrofa OX=9823 GN=HYI PE=1 SV=2	30263	5	5	1	0	8	0	0	0	0	0	0	2	0	0
F1SM19|F1SM19_PIG	Uncharacterized protein OS=Sus scrofa OX=9823 GN=DNAJB3 PE=4 SV=1	26684	4	4	3	3	1	4	3	3	0	4	2	0	0	0
M3VK32|M3VK32_PIG	Serine/threonine-protein phosphatase OS=Sus scrofa OX=9823 GN=PPP4C PE=2 SV=1	35080	5	4	3	3	2	2	3	2	1	4	0	0	2	0
F1SMR8|F1SMR8_PIG	Transmembrane protein 209 OS=Sus scrofa OX=9823 GN=TMEM209 PE=4 SV=2	62732	5	5	1	1	0	0	0	0	0	0	0	0	0	0
F1RG13|F1RG13_PIG	Intraflagellar transport 140 OS=Sus scrofa OX=9823 GN=IFT140 PE=4 SV=2	161162	4	4	3	2	0	2	4	0	0	2	0	0	0	0
I3LHX0|I3LHX0_PIG	EARP complex and GARP complex interacting protein 1 OS=Sus scrofa OX=9823 GN=EIPR1 PE=1 SV=1	43270	4	4	3	3	3	3	3	5	1	2	7	0	0	0
A0A287AE24|A0A287AE24_PIG	Uncharacterized protein OS=Sus scrofa OX=9823 PE=1 SV=1	23512	3	1	0	0	0	0	1	0	0	0	0	3	3	0
F1STC5|F1STC5_PIG	Uncharacterized protein OS=Sus scrofa OX=9823 PE=1 SV=4	23626	3	1	0	0	0	0	0	0	0	0	0	3	0	0
F1SFE1|F1SFE1_PIG	DDHD domain containing 1 OS=Sus scrofa OX=9823 GN=DDHD1 PE=4 SV=2	104719	6	6	0	0	0	0	0	0	0	0	0	0	0	0
A0A287B4D6|A0A287B4D6_PIG	DDHD domain containing 1 OS=Sus scrofa OX=9823 GN=DDHD1 PE=4 SV=1	97474	6	6	0	0	0	0	0	0	0	0	0	0	0	0
I3LK98|I3LK98_PIG	DDHD domain containing 1 OS=Sus scrofa OX=9823 GN=DDHD1 PE=4 SV=2	98225	6	6	0	1	0	0	0	0	0	0	0	0	0	0
I3LVS7|I3LVS7_PIG	Ras homolog family member A OS=Sus scrofa OX=9823 GN=RHOA PE=1 SV=1	21768	4	1	1	2	2	0	4	0	2	2	0	3	15	0
F8J1Q4|F8J1Q4_PIG	TDRKH OS=Sus scrofa OX=9823 PE=2 SV=1	61496	6	6	0	8	0	1	8	0	0	2	0	4	3	2
I3LP40|I3LP40_PIG	Tudor and KH domain containing OS=Sus scrofa OX=9823 GN=TDRKH PE=1 SV=1	61530	6	6	0	0	0	1	0	0	0	0	0	4	0	2
A0A287ASH3|A0A287ASH3_PIG	NGG1 interacting factor 3 like 1 OS=Sus scrofa OX=9823 GN=NIF3L1 PE=1 SV=1	48992	4	4	0	3	3	0	0	0	0	1	0	2	1	0
A0A287B238|A0A287B238_PIG	NIF3-like protein 1 OS=Sus scrofa OX=9823 GN=NIF3L1 PE=1 SV=1	39039	4	4	0	0	3	0	0	0	0	0	0	2	0	0
A0A287B587|A0A287B587_PIG	NIF3-like protein 1 OS=Sus scrofa OX=9823 GN=NIF3L1 PE=1 SV=1	41178	4	4	0	0	3	0	0	0	0	0	0	2	0	0
I3LGT4|I3LGT4_PIG	NIF3-like protein 1 OS=Sus scrofa OX=9823 GN=NIF3L1 PE=1 SV=2	41816	4	4	0	0	3	0	0	0	0	0	0	2	0	0
F1S105|F1S105_PIG	Uncharacterized protein OS=Sus scrofa OX=9823 GN=UBE2D3 PE=3 SV=3	16687	3	3	3	0	0	3	0	0	1	0	0	3	0	0
A0A288CFV1|A0A288CFV1_PIG	Uncharacterized protein OS=Sus scrofa OX=9823 GN=UBE2D3 PE=3 SV=1	16785	3	3	3	0	0	3	0	0	1	0	0	3	0	0
A0A287A0Y3|A0A287A0Y3_PIG	Myosin IIIB OS=Sus scrofa OX=9823 GN=MYO3B PE=3 SV=1	147195	4	4	1	2	0	1	3	0	2	2	0	0	0	0
A0A287A8Z9|A0A287A8Z9_PIG	Myosin IIIB OS=Sus scrofa OX=9823 GN=MYO3B PE=3 SV=1	128028	4	4	1	0	0	1	0	0	2	0	0	0	0	0
A0A287AZI8|A0A287AZI8_PIG	Myosin IIIB OS=Sus scrofa OX=9823 GN=MYO3B PE=3 SV=1	152505	4	4	1	0	0	1	0	0	2	0	0	0	0	0
F1SF87|F1SF87_PIG	Solute carrier family 25 member 13 OS=Sus scrofa OX=9823 GN=SLC25A13 PE=1 SV=3	74330	7	7	3	0	2	0	0	0	0	0	0	2	0	0
M3VH80|M3VH80_PIG	Solute carrier family 25 (Aspartate/glutamate carrier) member 13 tv2 OS=Sus scrofa OX=9823 GN=SLC25A13 PE=2 SV=1	74399	7	7	3	0	2	0	0	0	0	0	0	2	0	0
A0A286ZKD4|A0A286ZKD4_PIG	Solute carrier family 25 member 13 OS=Sus scrofa OX=9823 GN=SLC25A13 PE=1 SV=1	75519	7	7	3	0	2	0	0	0	0	0	0	2	2	0
A0A287B665|A0A287B665_PIG	Solute carrier family 25 member 13 OS=Sus scrofa OX=9823 GN=SLC25A13 PE=1 SV=1	75950	7	7	3	0	2	0	0	0	0	0	0	2	0	0
F1ST91|F1ST91_PIG	Serine/threonine kinase 31 OS=Sus scrofa OX=9823 GN=STK31 PE=4 SV=3	111816	6	6	3	14	0	3	20	0	1	9	0	0	0	0
F2Z5K4|F2Z5K4_PIG	Ras homolog family member C OS=Sus scrofa OX=9823 GN=RHOC PE=1 SV=1	22006	4	1	1	0	0	0	0	0	1	0	0	4	0	0
F1RFY1|F1RFY1_PIG	Profilin OS=Sus scrofa OX=9823 GN=PFN1 PE=1 SV=1	15043	5	5	1	6	0	0	3	0	0	3	0	9	9	0
A5GFM8|A5GFM8_PIG	Orthologue of H. sapiens chromosome 20 open reading frame 85 (C20orf85) OS=Sus scrofa OX=9823 GN=C17H20orf85 PE=4 SV=1	15707	4	4	0	0	0	2	0	0	5	2	0	0	0	0
I3LTM5|I3LTM5_PIG	C-type lectin domain containing 16A OS=Sus scrofa OX=9823 GN=CLEC16A PE=4 SV=2	107876	6	6	2	6	0	3	9	0	1	2	0	0	0	0
F1RQ10|F1RQ10_PIG	Uncharacterized protein OS=Sus scrofa OX=9823 GN=MUT PE=4 SV=3	83136	5	5	1	0	3	0	0	0	0	0	0	0	0	0
A0A0B8S047|A0A0B8S047_PIG	Methylmalonyl CoA mutase OS=Sus scrofa domesticus OX=9825 GN=MUT PE=4 SV=1	83243	5	5	1	0	3	0	0	0	0	0	0	0	0	0
A0ST05|A0ST05_PIG	Cytochrome c oxidase subunit 1 OS=Sus scrofa OX=9823 GN=COI PE=3 SV=1	56944	5	4	0	0	0	5	0	3	0	0	2	0	0	0
A0A076JFT5|A0A076JFT5_PIG	Cytochrome c oxidase subunit 1 OS=Sus scrofa OX=9823 GN=COX1 PE=3 SV=1	56926	5	4	0	0	0	5	0	3	0	0	2	0	0	0
T1P3W7|T1P3W7_PIG	Cytochrome c oxidase subunit 1 OS=Sus scrofa OX=9823 GN=COX1 PE=3 SV=1	56928	5	4	0	0	0	5	0	3	0	0	2	0	0	0
A0A1D8DAM9|A0A1D8DAM9_PIG	Cytochrome c oxidase subunit 1 OS=Sus scrofa OX=9823 GN=COX1 PE=3 SV=1	57016	5	4	0	0	0	5	0	3	0	0	2	0	0	0
Q1P9R4|Q1P9R4_PIG	Cytochrome c oxidase subunit 1 OS=Sus scrofa OX=9823 GN=COI PE=3 SV=1	56942	5	4	0	0	0	5	0	3	0	0	2	0	0	0
A0A076EHN2|A0A076EHN2_PIG	Cytochrome c oxidase subunit 1 OS=Sus scrofa domesticus OX=9825 GN=COX1 PE=3 SV=1	56932	5	4	0	0	0	5	0	3	0	0	2	0	0	0
Q69G33|Q69G33_PIG	Cytochrome c oxidase subunit 1 OS=Sus scrofa OX=9823 GN=COX1 PE=3 SV=1	56886	5	4	0	0	0	5	0	3	0	0	2	0	0	0
A9LFW9|A9LFW9_PIG	Cytochrome c oxidase subunit 1 OS=Sus scrofa OX=9823 GN=COX1 PE=3 SV=1	56990	5	4	0	0	0	5	0	3	0	0	2	0	0	0
E3T1V7|E3T1V7_PIG	Cytochrome c oxidase subunit 1 OS=Sus scrofa taivanus OX=310261 GN=COX1 PE=3 SV=1	56958	5	4	0	0	0	5	0	3	0	0	2	0	0	0
Q1WEZ6|Q1WEZ6_PIG	Cytochrome c oxidase subunit 1 OS=Sus scrofa OX=9823 GN=COX1 PE=3 SV=1	56928	5	4	0	0	0	5	0	3	0	0	2	0	0	0
A9Z1A9|A9Z1A9_PIG	Cytochrome c oxidase subunit 1 OS=Sus scrofa OX=9823 GN=COX1 PE=3 SV=1	56850	5	4	0	0	0	5	0	3	0	0	2	0	0	0
Q1HBH1|Q1HBH1_PIG	Cytochrome c oxidase subunit 1 OS=Sus scrofa OX=9823 GN=COI PE=3 SV=1	56898	5	4	0	0	0	5	0	3	0	0	2	0	0	0
A0A076ED98|A0A076ED98_PIG	Cytochrome c oxidase subunit 1 OS=Sus scrofa domesticus OX=9825 GN=COX1 PE=3 SV=1	56960	5	4	0	0	0	5	0	3	0	0	2	0	0	0
A0S0C5|A0S0C5_PIG	Cytochrome c oxidase subunit 1 OS=Sus scrofa OX=9823 GN=COX1 PE=3 SV=1	56933	5	4	0	0	0	5	4	3	0	1	2	0	0	0
A0A286ZIQ2|A0A286ZIQ2_PIG	N-ribosyldihydronicotinamide:quinone reductase 2 OS=Sus scrofa OX=9823 GN=NQO2 PE=1 SV=1	22339	4	4	0	0	0	0	0	0	0	0	0	1	0	0
I3LLY4|I3LLY4_PIG	N-ribosyldihydronicotinamide:quinone reductase 2 OS=Sus scrofa OX=9823 GN=NQO2 PE=1 SV=2	26120	4	4	0	0	12	0	0	0	0	0	0	1	0	0
A0A287BRP6|A0A287BRP6_PIG	ER lipid raft associated 2 OS=Sus scrofa OX=9823 GN=ERLIN2 PE=1 SV=1	41105	6	6	0	0	0	0	0	0	0	0	0	6	0	0
B8XSJ2|B8XSJ2_PIG	ER lipid raft-associated 2 isoform 2 OS=Sus scrofa OX=9823 GN=ERLIN2 PE=2 SV=1	37803	6	6	0	0	0	0	0	0	0	0	0	6	0	0
F1RX83|F1RX83_PIG	ER lipid raft associated 2 OS=Sus scrofa OX=9823 GN=ERLIN2 PE=1 SV=2	37818	6	6	0	0	0	0	0	0	0	0	0	6	9	0
A0A0B8RVW4|A0A0B8RVW4_PIG	Glucose-6-phosphate 1-dehydrogenase OS=Sus scrofa domesticus OX=9825 GN=G6PD PE=3 SV=1	59248	5	1	0	0	0	0	0	0	0	0	0	6	0	0
F1SEV8|F1SEV8_PIG	Eukaryotic translation elongation factor 1 delta OS=Sus scrofa OX=9823 GN=EEF1D PE=1 SV=3	74454	5	4	1	4	0	0	2	0	0	0	0	1	6	3
F1SHD6|F1SHD6_PIG	Uncharacterized protein OS=Sus scrofa OX=9823 GN=EEF1B2 PE=1 SV=1	24805	4	3	0	2	0	0	1	0	0	0	0	4	2	2
F1S0G3|F1S0G3_PIG	Uncharacterized protein OS=Sus scrofa OX=9823 GN=CFAP206 PE=4 SV=1	70958	4	4	0	0	6	2	2	0	0	2	0	0	0	0
F1SLT1|F1SLT1_PIG	Myeloid leukemia factor 2 OS=Sus scrofa OX=9823 GN=MLF2 PE=1 SV=1	28065	4	4	1	1	2	1	6	1	3	4	5	2	0	0
A0A287A6V6|A0A287A6V6_PIG	Single stranded DNA binding protein 1 OS=Sus scrofa OX=9823 GN=SSBP1 PE=1 SV=1	17136	6	6	1	0	8	0	0	0	0	0	0	9	6	6
I3L714|I3L714_PIG	Uncharacterized protein OS=Sus scrofa OX=9823 PE=4 SV=2	17987	4	2	2	5	0	2	4	1	3	4	2	1	0	0
A0A287B5T5|A0A287B5T5_PIG	Uncharacterized protein OS=Sus scrofa OX=9823 PE=4 SV=1	21884	4	2	2	0	0	2	0	1	3	0	2	1	0	0
I3LFS9|I3LFS9_PIG	Uncharacterized protein OS=Sus scrofa OX=9823 PE=4 SV=2	16808	4	2	2	0	0	2	0	1	3	0	2	1	0	0
I3LGN3|I3LGN3_PIG	Uncharacterized protein OS=Sus scrofa OX=9823 GN=LOC100738971 PE=4 SV=2	18000	4	2	2	0	0	2	0	1	3	0	2	1	0	0
A0A286ZN80|A0A286ZN80_PIG	Uncharacterized protein OS=Sus scrofa OX=9823 GN=LOC100738971 PE=4 SV=1	19736	4	2	2	0	0	2	0	1	3	0	2	1	0	0
A0A286ZWD1|A0A286ZWD1_PIG	Uncharacterized protein OS=Sus scrofa OX=9823 GN=LOC100738971 PE=4 SV=1	20818	4	2	2	0	0	2	0	1	3	0	2	1	0	0
A0A287BIM3|A0A287BIM3_PIG	Uncharacterized protein OS=Sus scrofa OX=9823 GN=LOC100738971 PE=4 SV=1	20979	4	2	2	0	0	2	0	1	3	0	2	1	0	0
A0A287B1C0|A0A287B1C0_PIG	Uncharacterized protein OS=Sus scrofa OX=9823 GN=LOC100738971 PE=4 SV=1	21178	4	2	2	0	0	2	0	1	3	0	2	1	0	0
I3LD55|I3LD55_PIG	Ubiquinone biosynthesis O-methyltransferase mitochondrial OS=Sus scrofa OX=9823 GN=COQ3 PE=1 SV=2	44766	3	3	0	0	0	0	0	0	0	0	0	3	0	0
A0A287B6T3|A0A287B6T3_PIG	Ubiquinone biosynthesis O-methyltransferase mitochondrial OS=Sus scrofa OX=9823 GN=FAXC PE=1 SV=1	41395	3	3	0	0	0	0	0	0	0	0	0	3	0	0
F1RXY4|F1RXY4_PIG	Ubiquinone biosynthesis O-methyltransferase mitochondrial OS=Sus scrofa OX=9823 GN=FAXC PE=1 SV=2	34692	3	3	0	0	0	0	0	0	0	0	0	3	0	0
I3L7H4|I3L7H4_PIG	Lamin tail domain containing 1 OS=Sus scrofa OX=9823 GN=LMNTD1 PE=4 SV=2	56459	2	2	0	0	4	1	0	0	1	0	0	0	0	0
A0A286ZJD2|A0A286ZJD2_PIG	Lamin tail domain containing 1 OS=Sus scrofa OX=9823 GN=LMNTD1 PE=4 SV=1	56309	2	2	0	0	4	1	0	0	1	0	0	0	0	0
F1RUC1|F1RUC1_PIG	Cullin 4B OS=Sus scrofa OX=9823 GN=CUL4B PE=1 SV=3	102951	5	5	0	0	5	2	0	3	0	0	0	1	0	0
K7GPT4|K7GPT4_PIG	Cullin 4B OS=Sus scrofa OX=9823 GN=CUL4B PE=1 SV=2	98830	5	5	0	0	5	2	0	3	0	0	0	1	0	0
A0A286ZMD8|A0A286ZMD8_PIG	Cullin 4B OS=Sus scrofa OX=9823 GN=CUL4B PE=1 SV=1	90391	5	5	0	0	0	2	0	0	0	0	0	1	0	0
A0A0B8RVZ1|A0A0B8RVZ1_PIG	Cullin 4B OS=Sus scrofa domesticus OX=9825 GN=CUL4B PE=3 SV=1	102480	5	5	0	0	5	2	0	3	0	0	0	1	0	0
A0A286ZUX3|A0A286ZUX3_PIG	Cullin 4B OS=Sus scrofa OX=9823 GN=CUL4B PE=1 SV=1	102494	5	5	0	12	5	2	6	3	0	1	0	1	0	0
I3L5M8|I3L5M8_PIG	Cullin 4B OS=Sus scrofa OX=9823 GN=CUL4B PE=1 SV=2	103873	5	5	0	0	5	2	0	3	0	0	0	1	0	0
F1S440|F1S440_PIG	Chibby family member 3 OS=Sus scrofa OX=9823 GN=CBY3 PE=4 SV=3	24032	3	3	2	2	1	2	2	1	2	4	7	0	0	0
I3LJ48|I3LJ48_PIG	Enoyl-CoA hydratase and 3-hydroxyacyl CoA dehydrogenase OS=Sus scrofa OX=9823 GN=EHHADH PE=1 SV=2	80317	3	3	0	0	0	0	0	0	0	0	0	3	0	0
A0A287A6K2|A0A287A6K2_PIG	Epiplakin 1 OS=Sus scrofa OX=9823 GN=EPPK1 PE=4 SV=1	484176	4	4	0	4	0	0	1	0	0	0	0	4	4	0
G9BWP8|G9BWP8_PIG	Growth differentiation factor 9 OS=Sus scrofa OX=9823 GN=GDF9 PE=2 SV=1	50468	4	4	0	0	0	0	0	0	0	0	0	4	3	0
Q6GUA6|Q6GUA6_PIG	Growth differentiation factor 9 OS=Sus scrofa OX=9823 GN=GDF9 PE=2 SV=1	50595	4	4	0	0	0	0	0	0	0	0	0	4	0	0
Q6DQX1|Q6DQX1_PIG	GDF9 (Fragment) OS=Sus scrofa OX=9823 GN=GDF9 PE=2 SV=1	50502	4	4	0	0	0	0	0	0	0	0	0	4	0	0
A0A287AB47|A0A287AB47_PIG	Histone deacetylase 6 OS=Sus scrofa OX=9823 GN=HDAC6 PE=1 SV=1	117071	4	4	1	8	0	5	3	0	2	2	0	0	0	0
I3LEZ7|I3LEZ7_PIG	Histone deacetylase 6 OS=Sus scrofa OX=9823 GN=HDAC6 PE=1 SV=2	122028	4	4	1	0	0	5	0	0	2	0	0	0	0	0
sp|P04574|CPNS1_PIG	Calpain small subunit 1 OS=Sus scrofa OX=9823 GN=CAPNS1 PE=1 SV=1	28068	4	4	0	2	5	2	3	0	0	1	0	0	1	0
A0A287AWB5|A0A287AWB5_PIG	Abhydrolase domain containing 16A OS=Sus scrofa OX=9823 GN=ABHD16A PE=1 SV=1	62878	4	4	3	7	0	0	1	0	0	0	0	0	0	0
F1SFF8|F1SFF8_PIG	Alpha-1 4 glucan phosphorylase OS=Sus scrofa OX=9823 GN=PYGL PE=1 SV=3	97563	5	2	0	4	0	0	2	0	0	0	0	4	4	0
B1A8Z3|B1A8Z3_PIG	Alpha-1 4 glucan phosphorylase OS=Sus scrofa OX=9823 PE=2 SV=1	97505	5	2	0	0	0	0	0	0	0	0	0	4	0	0
F6QA36|F6QA36_PIG	Actin-related protein 2 OS=Sus scrofa OX=9823 GN=ACTR2 PE=1 SV=1	45377	4	4	1	3	0	0	0	0	0	2	0	0	3	0
B5APU3|B5APU3_PIG	Actin-related protein 2 OS=Sus scrofa OX=9823 GN=ACTR2 PE=1 SV=1	44761	4	4	1	0	0	0	0	0	0	0	0	0	0	0
A0A287B4B9|A0A287B4B9_PIG	Tripeptidyl peptidase 1 OS=Sus scrofa OX=9823 GN=TPP1 PE=1 SV=1	50557	4	4	1	0	0	2	0	0	0	0	0	0	0	0
I3LN42|I3LN42_PIG	GC vitamin D binding protein OS=Sus scrofa OX=9823 GN=GC PE=1 SV=2	53162	3	3	0	0	0	0	0	0	0	0	0	4	0	0
A0A287A0G9|A0A287A0G9_PIG	Eukaryotic translation initiation factor 3 subunit K OS=Sus scrofa OX=9823 GN=EIF3K PE=1 SV=1	24983	3	3	4	0	0	3	0	1	1	0	2	0	0	0
A0A287ART5|A0A287ART5_PIG	Eukaryotic translation initiation factor 3 subunit K OS=Sus scrofa OX=9823 GN=EIF3K PE=1 SV=1	28041	3	3	4	6	0	3	3	1	1	1	2	0	2	0
F1RI41|F1RI41_PIG	Eukaryotic translation initiation factor 3 subunit K OS=Sus scrofa OX=9823 GN=EIF3K PE=1 SV=3	29143	3	3	4	0	0	3	0	1	1	0	2	0	0	0
A0A287ANC9|A0A287ANC9_PIG	Polyamine oxidase OS=Sus scrofa OX=9823 GN=PAOX PE=4 SV=1	50124	3	3	0	0	0	0	0	0	0	0	0	1	0	0
A0A287A6G6|A0A287A6G6_PIG	Polyamine oxidase OS=Sus scrofa OX=9823 GN=PAOX PE=4 SV=1	55428	3	3	0	6	8	0	2	0	0	0	0	1	1	0
F1S069|F1S069_PIG	Pyruvate dehydrogenase kinase 1 OS=Sus scrofa OX=9823 GN=PDK1 PE=1 SV=2	49252	3	3	0	0	8	0	0	0	0	0	0	0	0	0
F1SMF4|F1SMF4_PIG	Integrin subunit alpha 2 OS=Sus scrofa OX=9823 GN=ITGA2 PE=1 SV=3	129342	2	2	0	0	0	0	0	0	0	0	0	2	3	0
A0A286ZUU8|A0A286ZUU8_PIG	Exportin 7 OS=Sus scrofa OX=9823 GN=XPO7 PE=1 SV=1	125025	4	4	0	0	0	0	0	0	0	0	0	0	0	0
F1SBQ0|F1SBQ0_PIG	Protein phosphatase Mg2+/Mn2+ dependent 1J OS=Sus scrofa OX=9823 GN=PPM1J PE=4 SV=3	54823	4	4	2	0	0	0	0	0	0	0	0	0	0	0
A0A287AB51|A0A287AB51_PIG	Uncharacterized protein OS=Sus scrofa OX=9823 GN=C12H17orf100 PE=1 SV=1	13233	3	3	1	2	2	2	2	3	1	2	4	0	0	0
A0A287AFS6|A0A287AFS6_PIG	Uncharacterized protein OS=Sus scrofa OX=9823 GN=C12H17orf100 PE=1 SV=1	13795	3	3	1	0	2	2	0	3	1	0	4	0	0	0
F1S4P7|F1S4P7_PIG	Protein arginine methyltransferase NDUFAF7 OS=Sus scrofa OX=9823 GN=NDUFAF7 PE=1 SV=2	49102	4	4	0	1	9	0	0	0	0	0	0	1	0	0
A0A287AAM6|A0A287AAM6_PIG	Vacuolar protein sorting 25 homolog OS=Sus scrofa OX=9823 GN=VPS25 PE=1 SV=1	23548	4	4	2	2	3	0	3	3	4	0	1	0	0	0
I3LML4|I3LML4_PIG	Tubulin alpha chain OS=Sus scrofa OX=9823 GN=TUBAL3 PE=1 SV=1	49327	4	1	3	0	0	6	0	0	0	0	0	1	0	0
A0A287A808|A0A287A808_PIG	Cytochrome c oxidase subunit OS=Sus scrofa OX=9823 GN=COX6B PE=1 SV=1	10156	6	6	0	0	5	0	0	2	0	0	0	8	0	3
A0A287AKM8|A0A287AKM8_PIG	Corneodesmosin OS=Sus scrofa OX=9823 GN=CDSN PE=4 SV=1	49097	5	5	0	0	0	0	0	0	0	0	0	12	0	0
sp|O19084|CDSN_PIG	Corneodesmosin (Fragment) OS=Sus scrofa OX=9823 GN=CDSN PE=3 SV=1	21644	5	5	0	0	0	0	0	0	0	0	0	12	0	0
A0A287BPQ1|A0A287BPQ1_PIG	Nucleoporin 188 OS=Sus scrofa OX=9823 GN=NUP188 PE=1 SV=1	196099	4	2	3	11	2	0	2	0	0	0	0	0	0	0
F1RR49|F1RR49_PIG	Nucleoporin 188 OS=Sus scrofa OX=9823 GN=NUP188 PE=1 SV=3	188588	4	2	3	0	2	0	0	0	0	0	0	0	0	0
A0A286ZMW0|A0A286ZMW0_PIG	Uncharacterized protein OS=Sus scrofa OX=9823 GN=ERP44 PE=1 SV=1	40002	3	3	1	3	0	1	0	0	0	0	0	2	7	0
B6CVD6|B6CVD6_PIG	Thioredoxin domain-containing 4 OS=Sus scrofa OX=9823 GN=TXNDC4 PE=1 SV=1	47016	3	3	1	0	0	1	0	0	0	0	0	2	0	0
A0A286ZHZ3|A0A286ZHZ3_PIG	Translin OS=Sus scrofa OX=9823 GN=TSN PE=1 SV=1	26169	4	4	2	0	0	3	0	2	0	0	3	7	0	0
A0A287AYW6|A0A287AYW6_PIG	Translin OS=Sus scrofa OX=9823 GN=TSN PE=1 SV=1	23675	4	4	2	0	0	3	0	2	0	0	3	7	0	0
F1RXY7|F1RXY7_PIG	Translin OS=Sus scrofa OX=9823 GN=TSN PE=1 SV=3	24588	4	4	2	4	0	3	2	2	0	4	3	7	8	0
F1SAM2|F1SAM2_PIG	Desmocollin 1 OS=Sus scrofa OX=9823 GN=DSC1 PE=4 SV=3	93784	3	3	0	0	0	0	0	0	0	0	0	4	0	0
F1SAM0|F1SAM0_PIG	Desmocollin 1 OS=Sus scrofa OX=9823 GN=DSC1 PE=4 SV=2	99975	3	3	0	0	0	0	0	0	0	0	0	4	0	0
A0A286ZX29|A0A286ZX29_PIG	Serpin family B member 12 OS=Sus scrofa OX=9823 GN=SERPINB12 PE=3 SV=1	46237	3	2	0	0	0	0	0	0	0	0	0	7	0	0
A0A287BN36|A0A287BN36_PIG	Uncharacterized protein OS=Sus scrofa OX=9823 GN=RAB5C PE=1 SV=1	23467	3	3	0	1	0	0	1	0	0	1	0	3	9	0
sp|Q95JC8|ARGI1_PIG	Arginase-1 OS=Sus scrofa OX=9823 GN=ARG1 PE=2 SV=1	35018	2	2	0	0	0	0	0	0	0	0	0	4	4	0
F1RVZ1|F1RVZ1_PIG	Acyl-coenzyme A oxidase OS=Sus scrofa OX=9823 GN=ACOX1 PE=1 SV=3	74816	6	6	0	0	0	0	0	0	0	0	0	7	0	0
A7J0B0|A7J0B0_PIG	Acyl-coenzyme A oxidase OS=Sus scrofa OX=9823 GN=ACOX1 PE=2 SV=1	74830	6	6	0	0	0	0	0	0	0	0	0	7	2	0
A0A287ARZ1|A0A287ARZ1_PIG	Thioredoxin domain containing 5 OS=Sus scrofa OX=9823 GN=TXNDC5 PE=1 SV=1	47990	5	5	0	0	0	0	0	0	0	0	0	6	18	4
sp|P19205|ACPH_PIG	Acylamino-acid-releasing enzyme OS=Sus scrofa OX=9823 GN=APEH PE=1 SV=2	81244	4	4	0	3	0	0	1	0	0	0	0	1	1	0
F1SPS7|F1SPS7_PIG	Acylamino-acid-releasing enzyme OS=Sus scrofa OX=9823 GN=APEH PE=4 SV=2	81258	4	4	0	0	7	0	0	0	0	0	0	1	0	0
I3LFX8|I3LFX8_PIG	Acylamino-acid-releasing enzyme OS=Sus scrofa OX=9823 GN=APEH PE=4 SV=2	83856	4	4	0	0	7	0	0	0	0	0	0	1	0	0
F1SNK3|F1SNK3_PIG	S-methyl-5'-thioadenosine phosphorylase OS=Sus scrofa OX=9823 GN=MTAP PE=1 SV=3	31238	4	4	0	0	0	0	0	0	0	0	0	4	13	0
A0A287AZB0|A0A287AZB0_PIG	Kynurenine aminotransferase 3 OS=Sus scrofa OX=9823 GN=KYAT3 PE=1 SV=1	50648	4	4	0	0	0	1	0	0	0	0	0	3	2	0
F1S4D5|F1S4D5_PIG	Kynurenine aminotransferase 3 OS=Sus scrofa OX=9823 GN=KYAT3 PE=1 SV=3	47254	4	4	0	0	0	1	0	0	0	0	0	3	0	0
A0A286ZQC1|A0A286ZQC1_PIG	SGT1 homolog MIS12 kinetochore complex assembly cochaperone OS=Sus scrofa OX=9823 GN=SUGT1 PE=1 SV=1	38290	5	5	0	1	11	0	2	1	0	0	1	2	14	2
A0A287AIQ8|A0A287AIQ8_PIG	ATPase H+ transporting V1 subunit E1 OS=Sus scrofa OX=9823 GN=ATP6V1E1 PE=1 SV=1	26123	4	2	0	0	0	0	0	0	0	0	0	2	0	0
F1S213|F1S213_PIG	Hydroxysteroid 17-beta dehydrogenase 7 OS=Sus scrofa OX=9823 GN=HSD17B7 PE=4 SV=1	37562	3	3	0	0	0	0	0	0	0	0	0	3	0	0
A0A287ABG3|A0A287ABG3_PIG	Hydroxysteroid 17-beta dehydrogenase 7 OS=Sus scrofa OX=9823 GN=HSD17B7 PE=4 SV=1	33947	3	3	0	0	0	0	0	0	0	0	0	3	2	0
A0A287ASR0|A0A287ASR0_PIG	Uncharacterized protein OS=Sus scrofa OX=9823 GN=SLC25A10 PE=3 SV=1	31256	3	3	1	0	7	0	0	0	0	0	0	3	4	0
A0A286ZU72|A0A286ZU72_PIG	ClpB homolog mitochondrial AAA ATPase chaperonin OS=Sus scrofa OX=9823 GN=CLPB PE=1 SV=1	74975	4	4	0	0	0	0	0	0	0	0	0	0	0	0
A0A287AYS2|A0A287AYS2_PIG	Centrosomal protein 72 OS=Sus scrofa OX=9823 GN=CEP72 PE=4 SV=1	73007	3	3	2	0	0	1	0	0	1	0	0	0	0	0
A0A287AET6|A0A287AET6_PIG	Centrosomal protein 72 OS=Sus scrofa OX=9823 GN=CEP72 PE=4 SV=1	68250	3	3	2	6	0	1	7	0	1	4	0	0	0	0
F1RPU8|F1RPU8_PIG	Mitochondrial pyruvate carrier OS=Sus scrofa OX=9823 GN=MPC2 PE=1 SV=3	14254	5	5	0	0	8	0	0	0	0	0	0	0	0	0
A0A287AMU6|A0A287AMU6_PIG	Uncharacterized protein OS=Sus scrofa OX=9823 GN=LOC100158011 PE=1 SV=1	11815	6	1	0	0	0	0	0	0	11	0	0	56	0	0
Q7M313|Q7M313_PIG	Proteinase inhibitor (Kunitz type) (Fragment) OS=Sus scrofa domesticus OX=9825 PE=1 SV=1	3525	6	1	0	0	0	0	0	0	11	0	0	56	0	0
A0A287BKZ3|A0A287BKZ3_PIG	Serine/threonine-protein phosphatase 2A 56 kDa regulatory subunit OS=Sus scrofa OX=9823 GN=PPP2R5C PE=1 SV=1	52528	4	4	1	0	2	1	0	0	0	0	0	0	0	0
A0A287BC70|A0A287BC70_PIG	Testis expressed 49 OS=Sus scrofa OX=9823 GN=TEX49 PE=4 SV=1	15603	3	3	1	0	2	6	0	4	2	0	5	0	0	0
I3LP39|I3LP39_PIG	Polypyrimidine tract binding protein 2 OS=Sus scrofa OX=9823 GN=PTBP2 PE=1 SV=2	54791	4	4	0	0	0	4	0	0	3	0	0	0	0	0
F1S549|F1S549_PIG	Polypyrimidine tract binding protein 2 OS=Sus scrofa OX=9823 GN=PTBP2 PE=1 SV=3	57491	4	4	0	1	0	4	6	0	3	0	0	0	0	0
I3LDE4|I3LDE4_PIG	Polypyrimidine tract binding protein 2 OS=Sus scrofa OX=9823 GN=PTBP2 PE=1 SV=2	37898	4	4	0	0	0	4	0	0	3	0	0	0	0	0
F1RIP4|F1RIP4_PIG	RuvB-like helicase OS=Sus scrofa OX=9823 GN=RUVBL2 PE=1 SV=2	51173	3	3	0	6	0	0	1	0	0	2	0	2	1	0
A0A287B8A9|A0A287B8A9_PIG	RuvB-like helicase OS=Sus scrofa OX=9823 GN=RUVBL2 PE=1 SV=1	46292	3	3	0	0	0	0	0	0	0	0	0	2	0	0
F1SB16|F1SB16_PIG	COP9 signalosome subunit 3 OS=Sus scrofa OX=9823 GN=COPS3 PE=1 SV=2	45432	4	4	1	4	1	2	4	3	0	4	1	4	4	0
A0A287AZA3|A0A287AZA3_PIG	COP9 signalosome subunit 3 OS=Sus scrofa OX=9823 GN=COPS3 PE=1 SV=1	40354	4	4	1	0	1	2	0	3	0	0	1	4	0	0
F1S0P0|F1S0P0_PIG	Cytochrome c oxidase subunit 6C OS=Sus scrofa OX=9823 GN=COX6C PE=4 SV=1	8602	3	3	0	0	9	3	1	7	4	0	6	2	6	0
sp|A1XQT2|COX6C_PIG	Cytochrome c oxidase subunit 6C OS=Sus scrofa OX=9823 GN=COX6C PE=3 SV=1	8800	3	3	0	0	9	3	0	7	4	0	6	2	0	0
A0A287A3X1|A0A287A3X1_PIG	Alpha-(1 6)-fucosyltransferase OS=Sus scrofa OX=9823 GN=FUT8 PE=3 SV=1	66421	5	5	0	0	14	0	0	0	0	0	0	0	0	0
A0A287AXP4|A0A287AXP4_PIG	Alpha-(1 6)-fucosyltransferase OS=Sus scrofa OX=9823 GN=FUT8 PE=3 SV=1	60248	5	5	0	0	0	0	0	0	0	0	0	0	0	0
F1S084|F1S084_PIG	Histone acetyltransferase type B catalytic subunit OS=Sus scrofa OX=9823 GN=HAT1 PE=1 SV=3	48729	4	4	2	8	0	1	4	0	1	14	0	3	4	0
F1SFT0|F1SFT0_PIG	Chromosome 1 open reading frame 68 OS=Sus scrofa OX=9823 GN=C1orf68 PE=4 SV=2	25496	2	2	0	0	0	0	0	0	0	0	0	6	0	0
A0A287AHT5|A0A287AHT5_PIG	Small nuclear ribonucleoprotein Sm D1 OS=Sus scrofa OX=9823 GN=SNRPD1 PE=1 SV=1	12393	2	2	6	0	0	8	0	3	4	0	2	0	0	0
F2Z5G9|F2Z5G9_PIG	Small nuclear ribonucleoprotein Sm D1 OS=Sus scrofa OX=9823 GN=SNRPD1 PE=1 SV=1	13282	2	2	6	11	0	8	6	3	4	9	2	0	2	0
A0A286ZQV8|A0A286ZQV8_PIG	Uncharacterized protein OS=Sus scrofa OX=9823 PE=4 SV=1	18072	4	2	0	0	0	0	0	0	0	0	0	12	0	0
A0A287ARB9|A0A287ARB9_PIG	Uncharacterized protein OS=Sus scrofa OX=9823 PE=4 SV=1	18808	4	2	0	0	0	0	0	0	0	0	0	12	3	0
A0A287BR54|A0A287BR54_PIG	Deoxythymidylate kinase OS=Sus scrofa OX=9823 GN=DTYMK PE=3 SV=1	23519	5	5	1	10	1	4	8	3	1	11	4	2	1	0
A0A286ZTJ3|A0A286ZTJ3_PIG	Uncharacterized protein OS=Sus scrofa OX=9823 GN=TMED7 PE=1 SV=1	21412	5	5	0	0	0	0	0	0	0	0	0	2	2	0
A0A286ZPD7|A0A286ZPD7_PIG	Uncharacterized protein OS=Sus scrofa OX=9823 GN=TMED7 PE=1 SV=1	25351	5	5	0	0	0	0	0	0	0	0	0	2	0	0
F1SCS1|F1SCS1_PIG	DEAD-box helicase 1 OS=Sus scrofa OX=9823 GN=DDX1 PE=1 SV=3	82405	4	4	2	17	0	2	11	0	1	1	0	0	2	0
M3TYC8|M3TYC8_PIG	DEAD (Asp-Glu-Ala-Asp) box helicase 1 OS=Sus scrofa OX=9823 GN=DDX1 PE=2 SV=1	82518	4	4	2	0	0	2	0	0	1	0	0	0	0	0
A0A286ZV95|A0A286ZV95_PIG	Transmembrane p24 trafficking protein 10 OS=Sus scrofa OX=9823 GN=TMED10 PE=1 SV=1	24911	4	4	0	0	0	0	0	0	0	0	0	5	12	0
A0A0B8RS75|A0A0B8RS75_PIG	Transmembrane emp24 domain-containing protein 10 OS=Sus scrofa domesticus OX=9825 GN=TMED10 PE=3 SV=1	24911	4	4	0	0	0	0	0	0	0	0	0	5	0	0
A0A287AHZ7|A0A287AHZ7_PIG	Uncharacterized protein OS=Sus scrofa OX=9823 GN=SSNA1 PE=1 SV=1	13571	4	4	1	2	2	1	1	1	2	1	0	0	0	0
E7EBY5|E7EBY5_PIG	MACRO domain containing protein 1 OS=Sus scrofa OX=9823 GN=MACROD1 PE=1 SV=1	35170	3	3	2	0	7	2	0	0	1	0	0	0	0	0
A0A286ZRX4|A0A286ZRX4_PIG	Uncharacterized protein OS=Sus scrofa OX=9823 GN=MACROD1 PE=1 SV=1	36263	3	3	2	10	7	2	5	0	1	4	0	0	0	0
[truncated: 2,574 more rows]

## Sheet: 24 hrs Original Data
Sus scrofa UniProt Accession	Protein Description	Avg. Mass	#Peptides	#Unique	Control Sperm Rep 1	Control Sperm Rep 2	Control Sperm Rep 3	Primed Control Rep 1	Primed Control Rep 2	Primed Control Rep 2	Cell-Free Treated Rep 1	Cell-Free Treated Rep 2	Cell-Free Treated Rep 3	Oocyte Extract Rep 1	Oocyte Extract Rep 2	Oocyte Extract Rep 3
A0A286ZWH7	A-kinase anchoring protein 4 OS=Sus scrofa OX=9823 GN=AKAP4 PE=4 SV=1	94393	508	507	3343	2952	1850	3987	2436	2201	1665	2705	3199	243	501	24
F1RYK8	Fibrous sheath interacting protein 2 OS=Sus scrofa OX=9823 GN=FSIP2 PE=4 SV=3	761102	355	343	408	361	233	426	329	297	119	285	400	5	29	0
F1RR82	Outer dense fiber of sperm tails 2 OS=Sus scrofa OX=9823 GN=ODF2 PE=4 SV=3	99196	331	19	1119	1861	772	1534	1205	1411	2672	1238	1889	81	211	21
D9IFC3	Outer dense fiber 2 OS=Sus scrofa OX=9823 GN=ODF2 PE=2 SV=1	93261	313	1	1010	1730	704	1422	1103	1355	2601	1153	1820	81	158	20
A0A287B6S4	Uncharacterized protein OS=Sus scrofa OX=9823 GN=LOC100626097 PE=4 SV=1	766738	254	242	191	153	77	211	157	110	25	150	163	0	4	0
A0A287AFU3	Dynein axonemal heavy chain 17 OS=Sus scrofa OX=9823 GN=DNAH17 PE=4 SV=1	502796	250	238	238	6	189	308	160	20	22	151	31	0	3	0
A0A287A275	Tubulin beta chain OS=Sus scrofa OX=9823 GN=TUBB4B PE=1 SV=1	49831	244	4	503	1144	700	1058	475	819	797	457	1219	66	98	53
Q5XLD3	Creatine kinase M-type OS=Sus scrofa OX=9823 GN=CKM PE=2 SV=1	43059	241	207	4	719	1688	0	371	2283	16	55	117	2445	990	178
D3K5M3	A-kinase (PRKA) anchor protein 3 OS=Sus scrofa OX=9823 GN=AKAP3 PE=2 SV=1	94045	241	2	542	356	308	670	399	338	133	405	477	32	39	0
A0A286ZQX0	A-kinase anchoring protein 3 OS=Sus scrofa OX=9823 GN=AKAP3 PE=4 SV=1	95052	240	1	543	358	308	671	400	338	134	406	476	32	39	0
F1RK98	Tubulin alpha chain OS=Sus scrofa OX=9823 GN=LOC100155138 PE=3 SV=3	51127	227	38	315	753	425	614	246	507	543	234	777	38	60	30
F1RMX7	Zonadhesin OS=Sus scrofa OX=9823 GN=ZAN PE=4 SV=3	270339	223	223	229	440	245	142	151	169	85	130	244	5	14	0
I3LJA4	Uncharacterized protein OS=Sus scrofa OX=9823 PE=3 SV=2	134207	222	222	596	176	193	726	331	123	120	344	191	34	36	0
F1RVR2	Dynein axonemal heavy chain 8 OS=Sus scrofa OX=9823 GN=DNAH8 PE=4 SV=2	536125	222	7	184	6	141	251	142	19	22	121	25	0	1	0
A0A286ZSC6	Dynein axonemal heavy chain 8 OS=Sus scrofa OX=9823 GN=DNAH8 PE=4 SV=1	509113	217	2	181	6	138	241	139	19	20	119	25	0	1	0
Q767L7	Tubulin beta chain OS=Sus scrofa OX=9823 GN=TUBB PE=2 SV=1	49671	216	6	386	889	544	841	372	639	604	350	941	49	83	47
Q29077	Outer dense fiber protein 1 OS=Sus scrofa OX=9823 GN=ODF1 PE=2 SV=1	29526	214	214	1623	2100	896	1775	1528	1608	3355	1477	2044	186	265	13
A0A287A6Y9	Tubulin beta chain OS=Sus scrofa OX=9823 GN=LOC100624785 PE=1 SV=1	49907	196	1	376	802	510	778	362	577	558	331	839	47	80	62
A0A287AH92	ALMS1 centrosome and basal body associated protein OS=Sus scrofa OX=9823 GN=ALMS1 PE=1 SV=1	481619	193	193	238	81	59	116	132	82	90	147	86	0	7	0
A0A287AD85	Polycystin family receptor for egg jelly OS=Sus scrofa OX=9823 GN=PKDREJ PE=4 SV=1	250153	186	186	166	16	285	14	181	5	5	217	6	0	32	0
F1STE2	Testis specific 10 OS=Sus scrofa OX=9823 GN=TSGA10 PE=4 SV=3	81106	185	185	197	335	183	279	199	314	610	227	342	17	29	0
P08001	Acrosin OS=Sus scrofa OX=9823 GN=ACR PE=1 SV=5	45362	177	1	551	1201	709	874	571	884	852	555	1142	59	90	15
I3LD62	Acrosin OS=Sus scrofa OX=9823 GN=ACR PE=3 SV=2	45044	177	1	512	1181	689	805	564	843	775	552	1096	59	90	15
A0A286ZY95	Fibronectin 1 OS=Sus scrofa OX=9823 GN=FN1 PE=1 SV=1	262325	157	2	248	115	118	232	66	98	42	44	134	23	3	0
I3LBP3	Maestro heat like repeat family member 2B OS=Sus scrofa OX=9823 GN=MROH2B PE=4 SV=2	179800	157	157	105	2	253	3	116	0	0	113	1	0	15	0
F1SS24	Fibronectin 1 OS=Sus scrofa OX=9823 GN=FN1 PE=1 SV=2	270595	156	1	245	113	118	230	67	96	42	45	132	23	3	0
P02550	Tubulin alpha-1A chain OS=Sus scrofa OX=9823 GN=TUBA1A PE=1 SV=1	50069	148	2	260	497	293	433	170	310	368	183	528	28	46	19
A0A287BMB7	Tubulin alpha chain OS=Sus scrofa OX=9823 GN=TUBA8 PE=1 SV=1	50045	147	8	196	513	273	380	162	329	352	157	498	21	45	18
A0A287AI93	Uncharacterized protein OS=Sus scrofa OX=9823 GN=IQCN PE=4 SV=1	82674	147	94	268	204	113	350	207	147	233	221	161	25	22	0
A0A287BCE6	Uncharacterized protein OS=Sus scrofa OX=9823 GN=FCGBP PE=1 SV=1	265392	146	146	211	8	38	294	23	2	101	18	15	2	0	0
A0A287AHL5	Dynein axonemal heavy chain 7 OS=Sus scrofa OX=9823 GN=DNAH7 PE=4 SV=1	460563	146	140	104	2	81	165	73	6	1	71	10	0	0	0
F1SHC1	Tubulin alpha chain OS=Sus scrofa OX=9823 GN=LOC100127131 PE=1 SV=1	49927	145	2	216	407	241	367	148	257	358	153	438	25	40	35
K9J6M4	E3 ubiquitin-protein ligase UBR4 OS=Sus scrofa OX=9823 GN=UBR4 PE=2 SV=1	572985	143	143	91	0	120	3	75	0	0	67	0	0	2	1
F1S605	Glutathione S-transferase OS=Sus scrofa OX=9823 GN=GSTM3 PE=1 SV=2	26933	140	127	935	944	570	1067	715	806	532	688	1178	54	199	61
F1ST87	Calicin OS=Sus scrofa OX=9823 GN=CCIN PE=4 SV=1	66818	139	139	256	266	196	321	182	200	151	192	268	21	23	0
F1SCU0	Uncharacterized protein OS=Sus scrofa OX=9823 GN=LOC100516797 PE=4 SV=2	64948	136	136	539	229	265	466	188	268	182	177	431	33	31	0
F1RFM8	Dynein axonemal heavy chain 10 OS=Sus scrofa OX=9823 GN=DNAH10 PE=4 SV=3	528786	133	132	63	2	42	130	34	8	3	35	18	0	0	0
A0A286ZNY1	Tubulin alpha chain OS=Sus scrofa OX=9823 GN=TUBA4A PE=1 SV=1	49924	131	3	219	444	263	369	151	278	364	168	466	24	41	31
I3LGD4	Clathrin heavy chain OS=Sus scrofa OX=9823 GN=CLTC PE=1 SV=2	189395	131	131	103	0	105	50	48	2	21	42	27	18	10	180
I3LQ79	Major vault protein OS=Sus scrofa OX=9823 GN=MVP PE=1 SV=2	99703	130	130	0	0	0	0	0	0	1	0	52	22	19	331
F1RL08	Tektin 5 OS=Sus scrofa OX=9823 GN=TEKT5 PE=4 SV=2	56664	128	127	325	439	177	427	317	343	602	348	407	18	54	1
F1RQD7	Family with sequence similarity 71 member B OS=Sus scrofa OX=9823 GN=FAM71B PE=4 SV=2	61392	127	118	558	366	259	679	259	312	557	269	354	37	39	0
B2CZF8	Milk fat globule-EGF factor 8 protein OS=Sus scrofa OX=9823 PE=2 SV=1	47850	125	125	157	18	253	11	130	19	5	159	18	0	27	1
F1RRW4	Angiotensin-converting enzyme OS=Sus scrofa OX=9823 GN=ACE PE=1 SV=2	84816	125	124	164	45	293	41	188	19	21	168	19	1	29	0
O02705	Heat shock protein HSP 90-alpha OS=Sus scrofa OX=9823 GN=HSP90AA1 PE=2 SV=3	84775	123	71	93	0	214	38	75	2	17	77	13	19	21	116
F1SUQ9	Peptidyl arginine deiminase 6 OS=Sus scrofa OX=9823 GN=PADI6 PE=2 SV=2	76926	123	123	0	0	0	0	0	0	0	1	33	30	18	372
F1SJ68	Mannosidase alpha class 2C member 1 OS=Sus scrofa OX=9823 GN=MAN2C1 PE=1 SV=3	111639	122	122	115	4	211	3	103	0	5	108	0	0	18	14
A0A288CFT0	Triosephosphate isomerase OS=Sus scrofa OX=9823 GN=TPI1 PE=1 SV=1	30505	119	16	423	350	297	413	253	362	124	239	495	28	43	39
F1RM74	Glyceraldehyde-3-phosphate dehydrogenase OS=Sus scrofa OX=9823 GN=GAPDHS PE=1 SV=2	35520	118	111	507	140	249	453	256	95	37	205	222	16	46	2
F1SMN3	Coiled-coil domain containing 136 OS=Sus scrofa OX=9823 GN=CCDC136 PE=1 SV=3	133275	118	118	200	109	127	180	169	73	102	172	131	2	14	0
A0A287BPT0	Amine oxidase OS=Sus scrofa OX=9823 GN=IL4I1 PE=1 SV=1	63550	117	117	122	131	269	165	143	137	116	151	207	11	31	0
A0A287BPZ5	Uncharacterized protein OS=Sus scrofa OX=9823 GN=IQCN PE=4 SV=1	70295	117	64	336	152	137	403	192	113	125	206	141	16	12	0
F1ST22	Dynein axonemal heavy chain 2 OS=Sus scrofa OX=9823 GN=DNAH2 PE=4 SV=3	499887	117	115	73	1	40	137	40	18	6	51	25	0	0	0
I3LNF2	Dynein axonemal heavy chain 1 OS=Sus scrofa OX=9823 GN=DNAH1 PE=4 SV=2	497682	116	116	71	3	41	87	47	1	3	39	4	0	0	0
F1S6M7	Tubulin beta chain OS=Sus scrofa OX=9823 PE=1 SV=1	50419	115	5	186	549	256	489	214	293	386	202	456	31	40	33
F1SL45	Acrosin-binding protein OS=Sus scrofa OX=9823 GN=ACRBP PE=4 SV=1	60827	114	114	296	136	310	817	152	242	417	143	394	35	36	1
F1RVC1	Glycerol kinase 2 OS=Sus scrofa OX=9823 GN=GK2 PE=3 SV=2	60651	113	85	132	261	179	113	120	219	56	136	291	2	17	0
A0A0B8RTA5	Aconitate hydratase mitochondrial OS=Sus scrofa domesticus OX=9825 GN=ACO2 PE=3 SV=1	85577	108	108	186	7	140	5	227	3	7	219	3	7	30	9
A0A287AGU2	ATP synthase subunit alpha OS=Sus scrofa OX=9823 GN=ATP5F1A PE=1 SV=1	59428	108	108	70	26	210	8	109	10	8	113	13	4	33	8
A0A286ZPG4	Filamin B OS=Sus scrofa OX=9823 GN=FLNB PE=1 SV=1	278931	107	102	45	0	0	25	1	0	4	0	0	7	12	168
Q2I373	Fascin OS=Sus scrofa OX=9823 GN=FSCN3 PE=2 SV=1	56181	106	106	197	270	119	211	223	197	356	208	245	11	37	0
Q1W5B8	Triosephosphate isomerase OS=Sus scrofa OX=9823 GN=TPI1 PE=2 SV=1	26652	104	1	315	282	253	318	206	303	112	192	399	24	36	34
K7GSU4	EF-hand domain containing 2 OS=Sus scrofa OX=9823 GN=EFHC2 PE=4 SV=2	87130	104	104	93	167	72	99	127	148	220	130	140	6	13	0
F1RVX7	Family with sequence similarity 166 member A OS=Sus scrofa OX=9823 GN=FAM166A PE=4 SV=1	36265	104	104	136	180	100	132	135	166	246	158	208	3	8	0
F1S2F6	Voltage-dependent anion-selective channel protein 2 OS=Sus scrofa OX=9823 GN=VDAC2 PE=4 SV=3	31605	102	4	572	677	276	264	574	448	171	540	576	15	53	11
K7GLT8	ATP synthase subunit beta OS=Sus scrofa OX=9823 GN=ATP5F1B PE=1 SV=2	60831	102	102	112	16	207	13	159	5	10	159	9	12	39	14
F1SEF3	Chromosome 2 open reading frame 16 OS=Sus scrofa OX=9823 GN=C2orf16 PE=4 SV=2	221205	102	102	154	51	44	179	65	63	36	70	77	0	1	0
A0A287BD08	Uncharacterized protein OS=Sus scrofa OX=9823 PE=3 SV=1	60682	101	39	98	197	162	75	95	200	47	100	249	4	17	0
F1SE27	Voltage-dependent anion-selective channel protein 3 OS=Sus scrofa OX=9823 GN=VDAC3 PE=1 SV=3	30604	100	93	506	465	316	238	438	435	144	442	587	22	43	8
Q9MZ15	Voltage-dependent anion-selective channel protein 2 OS=Sus scrofa OX=9823 GN=VDAC2 PE=2 SV=1	31593	99	1	573	665	268	264	569	431	169	536	567	15	53	11
I3LR32	T-complex protein 1 subunit epsilon OS=Sus scrofa OX=9823 GN=CCT5 PE=1 SV=2	59664	98	95	66	5	169	19	58	3	0	66	11	0	4	2
A0A287A5Y7	Dynein axonemal heavy chain 3 OS=Sus scrofa OX=9823 GN=DNAH3 PE=4 SV=1	462801	98	92	46	1	27	102	40	3	0	35	5	0	0	0
K9IVI1	2-oxoglutarate dehydrogenase mitochondrial OS=Sus scrofa OX=9823 GN=OGDH PE=1 SV=1	115640	96	83	138	7	82	4	122	1	0	118	11	25	29	19
F1SP29	Actin like 7A OS=Sus scrofa OX=9823 GN=ACTL7A PE=1 SV=1	49203	94	94	261	96	126	148	139	50	43	138	60	2	27	0
A0A287A3S5	Tektin 4 OS=Sus scrofa OX=9823 GN=TEKT4 PE=4 SV=1	51941	94	93	112	151	80	117	95	159	230	109	163	5	12	0
A0A287BJP9	Uncharacterized protein OS=Sus scrofa OX=9823 GN=SPATA31D1 PE=4 SV=1	170033	94	94	180	45	45	175	59	43	64	81	50	1	8	0
X4ZHK0	Phosphoglycerate kinase OS=Sus scrofa OX=9823 GN=PGK2 PE=2 SV=1	44895	93	70	168	81	197	104	136	62	31	140	70	1	18	7
I7HJH6	Seminal plasma sperm motility inhibitor OS=Sus scrofa OX=9823 GN=AQN-3 PE=2 SV=1	15034	92	92	557	621	551	739	210	728	817	248	879	64	34	13
I3LP90	Uncharacterized protein OS=Sus scrofa OX=9823 GN=DNAH12 PE=4 SV=2	365587	92	87	52	0	33	81	30	1	2	23	4	0	2	0
A0A0B8RTA2	Actin gamma 1 OS=Sus scrofa domesticus OX=9825 GN=ACTG1 PE=3 SV=1	41793	91	1	368	33	97	336	73	46	166	56	77	48	63	92
A0A0B8RTY2	Actin beta OS=Sus scrofa domesticus OX=9825 GN=ACTB PE=3 SV=1	41737	91	1	364	32	98	336	74	46	166	55	77	50	64	91
F1SEB3	Chromosome 9 open reading frame 24 OS=Sus scrofa OX=9823 GN=C9orf24 PE=4 SV=2	34413	91	91	171	332	131	221	221	196	473	192	256	6	30	0
A5A8V7	Heat shock 70 kDa protein 1-like OS=Sus scrofa OX=9823 GN=HSPA1L PE=2 SV=1	70344	91	47	158	14	144	82	92	15	20	92	9	9	24	62
I3LAZ9	Maestro heat like repeat family member 1 OS=Sus scrofa OX=9823 GN=MROH1 PE=4 SV=2	181260	91	2	42	4	113	7	55	1	0	48	6	0	1	0
A0A287AQA6	SPEM family member 3 OS=Sus scrofa OX=9823 GN=SPEM3 PE=4 SV=1	125423	91	91	152	30	40	152	59	30	30	99	43	1	3	0
Q4R0H8	Spermadhesin AWN OS=Sus scrofa OX=9823 GN=AWN PE=2 SV=1	16902	90	90	447	313	437	565	147	507	474	144	691	96	25	8
F1RSL4	Maestro heat like repeat family member 1 OS=Sus scrofa OX=9823 GN=MROH1 PE=4 SV=2	176621	90	1	42	4	111	7	55	1	0	48	6	0	1	0
F1SDE8	Tektin 3 OS=Sus scrofa OX=9823 GN=TEKT3 PE=4 SV=2	56473	88	88	126	220	90	172	133	186	321	146	199	8	19	0
F1S7E5	EF-hand domain containing 1 OS=Sus scrofa OX=9823 GN=EFHC1 PE=4 SV=1	74016	88	88	133	163	62	132	125	120	168	128	156	5	13	0
A0A0B8RW53	ATP-citrate synthase OS=Sus scrofa domesticus OX=9825 GN=ACLY PE=3 SV=1	120884	86	86	62	0	94	21	57	0	6	48	0	0	2	0
A0A0B8RT59	Cullin-associated and neddylation-dissociated 1 OS=Sus scrofa domesticus OX=9825 GN=CAND1 PE=4 SV=1	136375	85	81	38	0	117	4	45	0	0	49	1	0	0	0
Q8MI02	Hyaluronidase OS=Sus scrofa OX=9823 GN=SPAM-1 PE=1 SV=1	56040	85	85	127	116	167	28	106	188	8	98	235	1	12	0
F1RKZ6	Ubiquitin specific peptidase 7 OS=Sus scrofa OX=9823 GN=USP7 PE=1 SV=2	128502	84	84	75	1	103	21	41	1	2	36	5	0	4	13
F1RW75	Desmoplakin OS=Sus scrofa OX=9823 GN=DSP PE=1 SV=3	331618	84	84	26	15	7	4	49	18	20	51	9	10	101	51
A0A287BIL8	Endoplasmic reticulum chaperone BiP OS=Sus scrofa OX=9823 GN=HSPA5 PE=1 SV=1	72269	82	76	43	2	15	34	11	5	20	9	11	82	69	277
A0A286ZP34	HYDIN axonemal central pair apparatus protein OS=Sus scrofa OX=9823 GN=HYDIN PE=4 SV=1	565224	82	82	38	18	29	82	18	5	14	22	11	0	0	0
D0G0C8	Chaperonin containing TCP1 subunit 2 OS=Sus scrofa OX=9823 GN=CCT2 PE=1 SV=1	57444	81	81	87	10	156	41	59	4	4	52	16	0	15	26
D5K8A2	Mitochondria-eating protein OS=Sus scrofa OX=9823 GN=SPATA18 PE=2 SV=1	63300	81	81	250	53	88	111	137	14	44	145	30	2	18	0
F1SIK7	Dpy-19 like 2 OS=Sus scrofa OX=9823 GN=DPY19L2 PE=4 SV=2	100143	81	76	223	121	92	62	115	36	48	112	55	3	25	0
A0A287B749	Tubulin beta chain OS=Sus scrofa OX=9823 GN=TUBB6 PE=1 SV=1	45362	80	5	111	352	141	278	136	137	266	126	261	18	24	14
F1RUH0	HECT UBA and WWE domain containing 1 E3 ubiquitin protein ligase OS=Sus scrofa OX=9823 GN=HUWE1 PE=1 SV=2	486178	80	80	51	0	63	8	26	0	0	17	1	0	0	0
Q29554	Trifunctional enzyme subunit alpha mitochondrial OS=Sus scrofa OX=9823 GN=HADHA PE=1 SV=1	83107	79	79	94	30	107	10	114	2	5	112	6	4	20	21
I3LCA2	Chaperonin containing TCP1 subunit 8 OS=Sus scrofa OX=9823 GN=CCT8 PE=1 SV=2	59976	79	79	48	0	115	10	49	0	3	44	1	0	8	9
A0A287AMK0	Serum albumin OS=Sus scrofa OX=9823 GN=ALB PE=1 SV=1	67169	79	21	40	21	41	15	13	54	3	14	34	222	96	265
A0A287AH52	Uncharacterized protein OS=Sus scrofa OX=9823 GN=MUC5B PE=4 SV=1	473772	78	73	23	67	50	33	14	25	4	7	23	0	0	0
E1CAJ5	Protein disulfide-isomerase OS=Sus scrofa OX=9823 GN=grp-58 PE=2 SV=1	56859	78	78	32	0	6	23	1	0	1	2	6	85	64	262
A0A287B5W2	Uncharacterized protein OS=Sus scrofa OX=9823 GN=LOC100302368 PE=3 SV=1	25895	77	77	109	110	179	149	64	398	257	51	269	516	680	770
A0A0B8RZH9	Huntingtin interacting protein 1 OS=Sus scrofa domesticus OX=9825 GN=HIP1 PE=4 SV=1	113499	74	74	52	8	105	44	51	5	20	55	4	0	2	0
D0G0C9	T-complex protein 1 subunit eta OS=Sus scrofa OX=9823 GN=CCT7 PE=1 SV=1	59474	74	74	44	6	132	19	58	5	10	56	16	0	5	9
K9IW70	Acetyltransferase component of pyruvate dehydrogenase complex OS=Sus scrofa OX=9823 GN=DLAT PE=2 SV=1	69188	74	74	66	43	98	12	67	26	6	70	49	4	21	7
A0A0B8RSY9	Enolase 1 (Alpha) OS=Sus scrofa domesticus OX=9825 GN=ENO1 PE=3 SV=1	47288	72	49	41	5	102	4	36	22	2	49	13	62	58	21
A0A287AMZ2	T-complex protein 1 subunit gamma OS=Sus scrofa OX=9823 GN=CCT3 PE=1 SV=1	60654	72	72	59	13	132	22	63	13	9	66	18	0	10	10
P36968	Phospholipid hydroperoxide glutathione peroxidase OS=Sus scrofa OX=9823 GN=GPX4 PE=1 SV=3	22337	72	13	368	148	177	129	371	65	198	377	76	7	36	1
K9IVP5	N-myosin-9 OS=Sus scrofa OX=9823 GN=MYH9 PE=2 SV=1	226452	72	58	68	0	1	82	2	0	123	1	1	86	2	9
D5K8A9	Sperm acrosome membrane-associated protein 1 OS=Sus scrofa OX=9823 GN=SPACA1 PE=1 SV=1	32239	71	71	133	177	101	292	78	119	98	69	131	26	8	0
A0A287B8G0	Pyruvate kinase OS=Sus scrofa OX=9823 GN=PKM PE=1 SV=1	63182	71	8	69	76	76	82	58	68	14	56	76	2	16	10
F1SQZ1	F-actin-capping protein subunit alpha OS=Sus scrofa OX=9823 GN=CAPZA3 PE=3 SV=1	34878	71	71	126	91	96	144	74	81	43	72	159	4	7	0
A0A287A1G6	Uncharacterized protein OS=Sus scrofa OX=9823 GN=HK1 PE=1 SV=1	102294	71	71	88	11	98	7	71	5	4	67	7	0	10	0
F1SF28	Zona pellucida-binding protein 1 OS=Sus scrofa OX=9823 GN=ZPBP PE=4 SV=2	39610	71	71	129	43	158	95	59	38	56	48	59	2	6	0
Q6S4N2	Heat shock 70 kDa protein 1B OS=Sus scrofa OX=9823 GN=HSPA1B PE=2 SV=1	70098	71	25	66	6	40	40	30	4	11	41	2	8	19	103
F1SMZ7	Uncharacterized protein OS=Sus scrofa OX=9823 GN=HSPD1 PE=1 SV=3	60907	70	70	70	4	135	2	77	0	2	81	9	0	30	16
F1SS26	Uncharacterized protein OS=Sus scrofa OX=9823 GN=THBS1 PE=1 SV=2	129546	70	70	141	7	13	78	6	6	24	7	8	5	1	0
F1S3A9	Polyamine modulated factor 1 binding protein 1 OS=Sus scrofa OX=9823 GN=PMFBP1 PE=4 SV=3	118944	70	3	44	48	27	55	43	32	49	46	40	0	1	0
A0A286ZR68	Uncharacterized protein OS=Sus scrofa OX=9823 GN=HSP90AB1 PE=1 SV=1	83967	70	16	48	0	84	22	28	2	11	23	5	11	8	49
A0A286ZU97	Uncharacterized protein OS=Sus scrofa OX=9823 GN=MTCH2 PE=1 SV=1	33404	69	69	229	176	117	43	177	40	13	163	45	0	32	0
A0A344X2S4	Sodium/potassium-transporting ATPase subunit alpha OS=Sus scrofa domesticus OX=9825 GN=ATP1A4 PE=2 SV=1	114154	69	23	54	0	95	3	45	0	0	44	0	0	3	0
F1SHL9	Pyruvate kinase OS=Sus scrofa OX=9823 GN=PKM PE=1 SV=3	57878	69	6	71	73	67	80	59	57	25	58	74	2	16	16
I3LC73	Uncharacterized protein OS=Sus scrofa OX=9823 GN=FASN PE=1 SV=2	272017	69	48	85	0	0	63	2	0	39	0	0	0	0	0
F1SV60	Tektin 2 OS=Sus scrofa OX=9823 GN=TEKT2 PE=4 SV=1	49899	68	67	81	104	74	86	67	170	116	85	153	0	8	0
F1SB63	Uncharacterized protein OS=Sus scrofa OX=9823 GN=TCP1 PE=1 SV=2	60653	68	67	54	5	128	28	50	12	8	54	20	0	6	8
F1SKP4	Phospholipase A2 group VI OS=Sus scrofa OX=9823 GN=PLA2G6 PE=1 SV=3	89753	68	68	72	44	59	54	54	36	22	51	49	0	4	0
A0A287AN02	26S proteasome non-ATPase regulatory subunit 2 OS=Sus scrofa OX=9823 GN=PSMD2 PE=1 SV=1	100242	68	68	49	5	87	24	50	2	19	56	8	0	0	0
I3LCI2	Pyruvate dehydrogenase E1 component subunit alpha OS=Sus scrofa OX=9823 GN=PDHA1 PE=1 SV=1	43365	68	68	76	13	48	1	98	3	1	106	7	5	11	3
Q1KYT0	Beta-enolase OS=Sus scrofa OX=9823 GN=ENO3 PE=2 SV=1	47130	67	37	18	9	37	2	18	61	0	21	38	153	163	58
A0A287ADJ2	Heat shock protein family A (Hsp70) member 9 OS=Sus scrofa OX=9823 GN=HSPA9 PE=1 SV=1	73651	67	62	72	0	54	2	33	0	2	37	4	48	40	59
F1RNL4	Serine/threonine-protein phosphatase OS=Sus scrofa OX=9823 GN=PPP1CC PE=1 SV=3	38548	66	13	121	99	116	103	113	59	77	105	87	5	17	0
A0A286ZSD6	Glycerol-3-phosphate dehydrogenase OS=Sus scrofa OX=9823 GN=GPD2 PE=1 SV=1	81116	66	66	96	41	77	7	63	3	5	81	3	0	6	0
K7GMX6	Uncharacterized protein OS=Sus scrofa OX=9823 GN=GK PE=1 SV=2	57437	65	10	63	123	96	48	69	123	27	70	159	2	15	0
I3L7T4	Lon protease homolog mitochondrial OS=Sus scrofa OX=9823 GN=LONP1 PE=1 SV=2	106899	65	65	98	0	52	0	61	0	1	55	3	1	16	20
F1S9Q3	Uncharacterized protein OS=Sus scrofa OX=9823 GN=HSPA8 PE=1 SV=3	71882	65	36	72	11	38	50	28	15	31	30	10	21	26	155
A0A287AA61	Centrosomal protein 135 OS=Sus scrofa OX=9823 GN=CEP135 PE=4 SV=1	132950	65	65	56	42	23	40	27	21	42	39	41	0	0	0
F1RPN9	Malic enzyme OS=Sus scrofa OX=9823 GN=ME2 PE=1 SV=3	65650	65	64	4	0	0	1	0	0	0	4	38	83	30	70
A0A0K0KW08	L-lactate dehydrogenase OS=Sus scrofa OX=9823 GN=LDHAL6B PE=2 SV=1	41861	64	59	212	14	112	4	136	5	1	131	13	0	24	0
F1SDN2	Uncharacterized protein OS=Sus scrofa OX=9823 GN=HADHB PE=1 SV=2	51250	64	64	60	11	77	2	66	1	2	73	4	3	7	8
F1RJB0	Actin related protein T2 OS=Sus scrofa OX=9823 GN=ACTRT2 PE=1 SV=1	41729	64	59	130	51	80	57	71	38	12	79	48	0	9	0
A0A287BLV7	NADH:ubiquinone oxidoreductase core subunit S1 OS=Sus scrofa OX=9823 GN=NDUFS1 PE=1 SV=1	79540	64	64	41	0	65	30	48	0	0	59	0	6	6	0
Q7YR83	Epididymal sperm-binding protein 1 OS=Sus scrofa OX=9823 GN=ELSPBP1 PE=1 SV=1	26199	63	63	181	30	196	66	124	24	56	101	33	2	16	0
A0A287A2J9	Cullin 3 OS=Sus scrofa OX=9823 GN=CUL3 PE=1 SV=1	88959	63	63	33	0	77	4	28	0	1	27	0	0	0	5
D3K5J4	LY6/PLAUR domain containing 4 OS=Sus scrofa OX=9823 GN=LYPD4 PE=1 SV=1	26631	62	62	96	22	214	32	85	18	24	72	24	1	11	0
F1S8J6	RAB2B member RAS oncogene family OS=Sus scrofa OX=9823 GN=RAB2B PE=1 SV=1	24236	62	29	161	59	126	136	76	61	31	87	76	8	11	4
F1RS61	EF-hand domain family member B OS=Sus scrofa OX=9823 GN=EFHB PE=4 SV=3	96167	62	62	40	65	35	59	55	67	89	50	66	0	3	0
I3LQN8	Keratin 4 OS=Sus scrofa OX=9823 GN=KRT4 PE=1 SV=2	55389	62	42	47	43	77	43	66	67	29	69	77	16	62	36
F1SGG3	Keratin 1 OS=Sus scrofa OX=9823 GN=KRT1 PE=1 SV=2	64874	62	11	31	51	42	50	134	95	84	112	60	94	464	218
I3L912	Uncharacterized protein OS=Sus scrofa OX=9823 PE=4 SV=2	152820	61	60	73	75	58	97	70	64	75	79	64	4	8	0
A0A286ZQW4	Nucleoporin 210 like OS=Sus scrofa OX=9823 GN=NUP210L PE=4 SV=1	210467	61	60	39	12	70	4	40	8	0	39	12	0	2	0
A0A287B9W3	Dynein cytoplasmic 1 heavy chain 1 OS=Sus scrofa OX=9823 GN=DYNC1H1 PE=1 SV=1	428407	61	61	59	0	0	16	1	0	1	0	0	0	0	26
F1RRQ6	Uncharacterized protein OS=Sus scrofa OX=9823 GN=LOC102158372 PE=4 SV=3	94348	60	6	82	66	105	68	41	87	31	40	109	2	7	0
F1S2W0	Family with sequence similarity 71 member A OS=Sus scrofa OX=9823 GN=FAM71A PE=4 SV=2	63984	60	54	145	46	66	103	69	42	40	60	49	3	9	0
A0A286ZT25	Hormone-sensitive lipase OS=Sus scrofa OX=9823 GN=LIPE PE=4 SV=1	88704	60	60	60	3	83	8	38	1	0	38	2	0	2	0
F1RT87	RAB2A member RAS oncogene family OS=Sus scrofa OX=9823 GN=RAB2A PE=1 SV=3	23519	60	27	112	71	131	128	67	93	35	71	108	12	16	4
A0A287B2H7	L-lactate dehydrogenase OS=Sus scrofa OX=9823 GN=LDHA PE=1 SV=1	39754	60	5	69	78	90	42	66	69	17	61	77	1	15	2
I3LCC7	Glutathione peroxidase OS=Sus scrofa OX=9823 GN=GPX4 PE=1 SV=2	20554	60	1	344	143	151	118	352	56	174	358	65	7	35	1
F1SIL5	Vacuolar protein sorting 13 homolog A OS=Sus scrofa OX=9823 GN=VPS13A PE=1 SV=3	291884	60	60	51	2	32	34	26	5	10	20	13	0	0	0
A0A287A745	DNA (cytosine-5)-methyltransferase OS=Sus scrofa OX=9823 GN=DNMT1 PE=3 SV=1	156272	59	59	0	0	0	0	0	0	0	0	18	10	4	84
F1S0K1	Uncharacterized protein OS=Sus scrofa OX=9823 GN=LOC100515166 PE=1 SV=2	45868	58	22	43	36	62	34	73	53	40	74	60	19	118	43
A0A287AMM6	MICOS complex subunit MIC60 OS=Sus scrofa OX=9823 GN=IMMT PE=1 SV=1	82671	58	5	30	1	56	2	33	0	1	33	0	0	5	3
A0A287ADK3	Aldehyde dehydrogenase 7 family member A1 OS=Sus scrofa OX=9823 GN=ALDH7A1 PE=1 SV=1	55456	58	58	4	0	12	1	9	0	0	14	16	71	40	107
A0A287AP52	F-actin-capping protein subunit beta OS=Sus scrofa OX=9823 GN=CAPZB PE=1 SV=1	34446	57	7	145	87	84	109	60	62	57	60	101	3	3	2
F1S5N4	Glutathione S-transferase omega 2 OS=Sus scrofa OX=9823 GN=GSTO2 PE=3 SV=1	28350	57	55	178	185	87	164	161	137	154	148	154	14	25	0
A0A287BE53	Kelch like family member 10 OS=Sus scrofa OX=9823 GN=KLHL10 PE=4 SV=1	68947	57	57	43	16	59	12	31	10	4	41	16	0	2	0
F1SQN1	T-complex protein 1 subunit delta OS=Sus scrofa OX=9823 GN=CCT4 PE=1 SV=1	58057	56	52	52	6	105	23	59	9	5	55	20	0	7	4
C8C4M8	Zona pellucida binding protein 2 OS=Sus scrofa OX=9823 GN=ZPBP2 PE=1 SV=1	37181	56	56	63	5	116	2	53	3	0	57	3	0	8	0
F1SKM0	Ubiquinol-cytochrome c reductase core protein 1 OS=Sus scrofa OX=9823 GN=UQCRC1 PE=1 SV=2	50607	56	56	36	6	71	18	44	0	3	61	2	3	20	0
F1SMW9	26S proteasome non-ATPase regulatory subunit 1 OS=Sus scrofa OX=9823 GN=PSMD1 PE=1 SV=3	105814	56	56	34	1	78	4	36	0	11	33	2	0	0	4
A0A287BLC7	Acyl-CoA synthetase long chain family member 6 OS=Sus scrofa OX=9823 GN=ACSL6 PE=1 SV=1	80707	56	4	73	34	64	11	56	3	2	60	13	0	3	0
F1SS88	Cilia and flagella associated protein 52 OS=Sus scrofa OX=9823 GN=CFAP52 PE=4 SV=3	68118	56	56	34	48	39	51	37	20	49	34	65	0	2	0
I3LSM7	MICOS complex subunit MIC60 OS=Sus scrofa OX=9823 GN=IMMT PE=1 SV=2	79091	55	2	29	1	50	2	32	0	1	32	0	0	5	3
A0A287BI14	Chromosome 7 open reading frame 31 OS=Sus scrofa OX=9823 GN=C7orf31 PE=4 SV=1	67440	55	55	29	58	23	44	44	48	91	45	57	0	3	0
I3LDM6	Keratin 3 OS=Sus scrofa OX=9823 GN=KRT3 PE=1 SV=2	64800	55	4	12	43	43	11	97	83	48	94	58	45	291	116
F1S2H7	IQ motif containing GTPase activating protein 2 OS=Sus scrofa OX=9823 GN=IQGAP2 PE=1 SV=3	180815	55	55	30	0	41	8	13	0	6	8	0	0	0	0
A0A0B8RT86	Succinate dehydrogenase [ubiquinone] flavoprotein subunit mitochondrial OS=Sus scrofa domesticus OX=9825 GN=SDHA PE=3 SV=1	72832	54	54	70	3	70	2	79	1	3	100	4	15	6	1
A0A287B8F3	Fructose-bisphosphate aldolase OS=Sus scrofa OX=9823 GN=ALDOA PE=1 SV=1	44999	54	47	35	68	78	33	60	69	4	55	73	3	10	10
F1S8P1	Uncharacterized protein OS=Sus scrofa OX=9823 GN=SCCPDH PE=1 SV=3	47333	54	54	138	50	85	10	70	3	0	67	8	1	21	4
I3LK18	Polycystin 2 like 2 transient receptor potential cation channel OS=Sus scrofa OX=9823 GN=PKD2L2 PE=4 SV=2	71584	54	54	38	13	91	7	82	2	3	83	8	0	16	0
A0A286ZL42	Serine/threonine-protein phosphatase OS=Sus scrofa OX=9823 GN=PPP1CA PE=1 SV=1	38364	54	1	102	88	105	84	102	56	71	96	82	3	15	0
A0A287ALQ2	Acyl-CoA synthetase long chain family member 6 OS=Sus scrofa OX=9823 GN=ACSL6 PE=1 SV=1	77765	54	2	63	28	55	9	51	3	2	57	10	0	3	0
F1RVJ8	Armadillo repeat containing 4 OS=Sus scrofa OX=9823 GN=ARMC4 PE=4 SV=3	112898	54	54	46	20	40	48	40	8	8	44	12	0	0	0
F1S9K1	Isoleucyl-tRNA synthetase 2 mitochondrial OS=Sus scrofa OX=9823 GN=IARS2 PE=1 SV=3	113521	54	54	30	1	35	0	37	0	1	47	9	10	8	25
I3LT05	Uncharacterized protein OS=Sus scrofa OX=9823 GN=ROPN1 PE=4 SV=2	23949	53	53	330	70	79	118	133	44	26	117	72	8	30	0
F1SGH5	Uncharacterized protein OS=Sus scrofa OX=9823 GN=PDHB PE=1 SV=1	39273	53	53	133	15	39	5	82	5	5	79	3	5	14	4
I3LD34	Uncharacterized protein OS=Sus scrofa OX=9823 GN=MS4A14 PE=4 SV=2	96554	53	53	70	5	59	4	51	6	4	48	6	0	0	0
P00355	Glyceraldehyde-3-phosphate dehydrogenase OS=Sus scrofa OX=9823 GN=GAPDH PE=1 SV=4	35836	52	15	98	30	53	73	48	26	28	46	38	8	13	18
Q9TSX5	L-lactate dehydrogenase C chain OS=Sus scrofa OX=9823 GN=LDHC PE=2 SV=3	36053	52	34	46	82	114	30	49	99	24	58	123	1	10	1
P80964	Seminal plasma protein pB1 OS=Sus scrofa OX=9823 PE=1 SV=2	15373	52	52	175	21	320	145	214	22	160	170	31	9	27	0
F1SA70	Heat shock protein family A (Hsp70) member 2 OS=Sus scrofa OX=9823 GN=HSPA2 PE=1 SV=2	69025	52	29	94	22	49	77	38	15	27	40	15	10	14	43
D2SW96	L-lactate dehydrogenase OS=Sus scrofa OX=9823 PE=2 SV=1	36591	52	1	32	61	62	32	44	57	13	42	58	1	10	2
Q29092	Endoplasmin OS=Sus scrofa OX=9823 GN=HSP90B1 PE=2 SV=3	92471	52	35	40	0	8	22	1	0	10	0	24	32	13	73
A0A287AHM5	Uncharacterized protein OS=Sus scrofa OX=9823 GN=LOC100737030 PE=1 SV=1	50020	52	1	25	61	43	18	130	47	60	108	30	54	279	85
A0A0B8S0C5	Actinin alpha 4 OS=Sus scrofa domesticus OX=9825 GN=ACTN4 PE=4 SV=1	104905	52	3	40	0	8	19	3	0	9	2	0	9	9	49
P00346	Malate dehydrogenase mitochondrial OS=Sus scrofa OX=9823 GN=MDH2 PE=1 SV=2	35603	51	51	79	9	68	8	63	1	9	61	3	15	23	21
F1SBT8	Uncharacterized protein OS=Sus scrofa OX=9823 GN=ACSBG2 PE=1 SV=2	68193	51	51	96	15	79	10	60	3	0	60	3	0	9	0
A0A286ZNM0	Stabilizer of axonemal microtubules 1 OS=Sus scrofa OX=9823 GN=SAXO1 PE=4 SV=1	52513	51	51	81	35	44	92	56	5	73	52	22	2	1	0
F1RXB7	Leucine rich repeat and coiled-coil centrosomal protein 1 OS=Sus scrofa OX=9823 GN=LRRCC1 PE=4 SV=3	113249	51	51	31	55	22	37	45	46	55	48	51	0	0	0
A0A287B1I4	Uncharacterized protein OS=Sus scrofa OX=9823 GN=DCTN1 PE=1 SV=1	138422	51	51	25	0	52	15	12	0	0	8	0	0	0	0
D5K8A1	Spermatogenesis associated 6 OS=Sus scrofa OX=9823 GN=SPATA6 PE=2 SV=1	56013	51	51	45	52	32	34	36	48	81	48	48	1	2	0
F1RSM2	Proteasome 26S subunit non-ATPase 12 OS=Sus scrofa OX=9823 GN=PSMD12 PE=1 SV=1	53025	51	51	24	1	52	4	22	0	6	21	1	0	2	1
P42098	Zona pellucida sperm-binding protein 3 OS=Sus scrofa OX=9823 GN=ZP3 PE=1 SV=1	46239	51	51	0	0	0	0	0	0	13	5	39	67	48	165
Q9N0F1	Dihydrolipoyllysine-residue succinyltransferase component of 2-oxoglutarate dehydrogenase complex mitochondrial OS=Sus scrofa OX=9823 GN=DLST PE=1 SV=1	48977	51	51	8	5	19	0	7	0	1	7	18	108	85	47
I3L9J4	Uncharacterized protein OS=Sus scrofa OX=9823 GN=CCT6A PE=1 SV=2	57970	50	28	42	7	116	14	36	8	4	39	8	0	7	2
B5KJG2	Phosphoglycerate mutase OS=Sus scrofa OX=9823 GN=PGAM2 PE=1 SV=1	28677	50	38	29	8	159	11	42	28	2	57	10	28	11	1
F2Z5I5	Uncharacterized protein OS=Sus scrofa OX=9823 GN=CSNK2A1 PE=1 SV=1	45144	50	47	24	21	68	21	31	51	26	32	74	0	0	4
Q29594	Creatine kinase B-type OS=Sus scrofa OX=9823 GN=CKB PE=2 SV=2	42657	50	16	10	38	206	3	32	244	0	1	6	88	21	6
F1SDH8	Phospholipid-transporting ATPase OS=Sus scrofa OX=9823 GN=ATP8B3 PE=3 SV=3	164682	50	47	11	0	38	0	32	0	0	27	0	0	0	0
C9W109	Acetyl-coenzyme A carboxylase beta OS=Sus scrofa OX=9823 GN=ACACB PE=4 SV=1	276102	50	2	12	0	39	0	15	0	0	13	0	0	0	0
F1RYX9	Armadillo repeat containing 12 OS=Sus scrofa OX=9823 GN=ARMC12 PE=4 SV=2	38747	49	49	94	85	64	58	83	55	9	83	73	2	11	0
F1RGB5	Uncharacterized protein OS=Sus scrofa OX=9823 GN=ACACB PE=4 SV=3	275819	49	1	14	0	37	0	15	0	0	13	0	0	0	0
A0A286ZQV5	DnaJ heat shock protein family (Hsp40) member C13 OS=Sus scrofa OX=9823 GN=DNAJC13 PE=1 SV=1	254548	49	49	7	0	42	1	7	0	0	4	0	0	0	7
F1RUK8	Rab GDP dissociation inhibitor OS=Sus scrofa OX=9823 GN=GDI2 PE=1 SV=1	50327	48	38	19	0	59	4	19	1	4	27	4	2	2	53
A0A287A1E4	ATP-dependent 6-phosphofructokinase OS=Sus scrofa OX=9823 GN=PFKM PE=1 SV=1	88986	48	7	49	2	58	12	27	2	1	29	1	0	1	4
A0A0B8S0B6	ATPase H+ transporting lysosomal 70kDa V1 subunit A OS=Sus scrofa domesticus OX=9825 GN=ATP6V1A PE=3 SV=1	68444	48	48	37	7	62	13	35	3	4	34	11	0	1	6
A0A286ZQ50	Nucleoporin 155 OS=Sus scrofa OX=9823 GN=NUP155 PE=1 SV=1	154398	48	48	48	15	33	9	28	3	2	23	8	0	0	0
F1SAD9	Protein disulfide-isomerase OS=Sus scrofa OX=9823 GN=PDIA4 PE=1 SV=1	72909	48	48	2	0	0	1	0	0	0	0	0	13	5	105
A0A287BAZ5	Actinin alpha 4 OS=Sus scrofa OX=9823 GN=ACTN4 PE=1 SV=1	104378	48	2	36	0	9	17	3	0	9	2	0	9	9	49
F1SA46	Actin like 9 OS=Sus scrofa OX=9823 GN=ACTL9 PE=3 SV=1	45693	47	47	98	18	39	66	46	10	15	50	15	1	4	0
P00506	Aspartate aminotransferase mitochondrial OS=Sus scrofa OX=9823 GN=GOT2 PE=1 SV=2	47436	47	47	17	0	51	1	22	0	3	21	4	9	3	22
A0PFK4	F-actin-capping protein subunit beta OS=Sus scrofa OX=9823 GN=CP beta2 PE=2 SV=1	30611	47	1	101	62	75	70	43	51	39	41	84	2	3	1
I3LN22	Uncharacterized protein OS=Sus scrofa OX=9823 GN=LOC110255686 PE=4 SV=2	91665	47	47	31	0	41	0	52	0	0	48	0	0	6	0
I3L8Z8	Uncharacterized protein OS=Sus scrofa OX=9823 GN=LOC100514982 PE=1 SV=2	96079	47	12	70	59	65	44	35	44	18	36	67	1	4	0
F1RP44	Uncharacterized protein OS=Sus scrofa OX=9823 GN=IPO5 PE=1 SV=2	123625	47	47	44	18	15	40	24	13	14	20	22	0	0	0
D0G6X8	Beta-hexosaminidase OS=Sus scrofa OX=9823 GN=HEXB PE=1 SV=1	62110	47	47	32	12	46	36	18	11	27	16	16	0	0	13
I3LUR5	Acyl-CoA dehydrogenase family member 9 OS=Sus scrofa OX=9823 GN=ACAD9 PE=1 SV=2	68645	47	47	45	0	31	0	41	0	0	40	0	0	3	0
I3LDS3	Keratin 10 OS=Sus scrofa OX=9823 GN=KRT10 PE=1 SV=2	58980	47	6	19	38	28	26	75	64	30	64	47	58	318	178
F1RQP0	Uncharacterized protein OS=Sus scrofa OX=9823 GN=PRDX5 PE=1 SV=2	17266	46	46	109	10	133	20	57	5	7	56	9	0	12	0
Q6YT39	Lactotransferrin OS=Sus scrofa OX=9823 GN=LTF PE=1 SV=1	77612	46	1	14	57	23	15	20	36	14	17	33	10	3	1
I3LTK6	Uncharacterized protein OS=Sus scrofa OX=9823 GN=OAZ3 PE=4 SV=2	27303	46	46	58	114	120	83	101	173	100	80	273	4	15	3
F1SGG9	Uncharacterized protein OS=Sus scrofa OX=9823 PE=1 SV=3	35349	46	6	14	23	30	14	60	43	32	89	38	14	136	83
A0A287AWI9	Eukaryotic translation elongation factor 2 OS=Sus scrofa OX=9823 GN=EEF2 PE=1 SV=1	95354	46	45	48	2	6	24	4	4	15	3	4	0	9	39
F1SBS4	Complement C3 OS=Sus scrofa OX=9823 GN=C3 PE=1 SV=3	187034	46	46	28	0	1	27	0	0	0	1	0	45	1	0
F1SP30	Actin like 7B OS=Sus scrofa OX=9823 GN=ACTL7B PE=3 SV=1	45511	45	45	109	31	34	56	51	19	14	54	17	1	4	0
D3K5J6	Acrosomal vesicle protein 1 OS=Sus scrofa OX=9823 GN=ACRV1 PE=1 SV=1	28797	45	45	48	43	123	22	40	136	2	44	86	1	3	0
I3LND4	Fibronectin type III domain containing 8 OS=Sus scrofa OX=9823 GN=FNDC8 PE=4 SV=2	35106	45	45	104	47	40	143	45	45	50	55	43	6	9	0
A0A287AAM9	RAN binding protein 17 OS=Sus scrofa OX=9823 GN=RANBP17 PE=4 SV=1	123991	45	45	40	10	33	3	34	0	0	32	1	0	0	0
I3LLI7	Dynein axonemal intermediate chain 2 OS=Sus scrofa OX=9823 GN=DNAI2 PE=4 SV=2	69308	45	45	41	3	38	41	23	3	7	22	10	0	0	0
F1SN58	Uncharacterized protein OS=Sus scrofa OX=9823 GN=SQOR PE=1 SV=3	50125	45	45	26	1	55	0	37	0	1	35	0	0	3	0
F1RZG8	Meiosis specific nuclear structural 1 OS=Sus scrofa OX=9823 GN=MNS1 PE=4 SV=3	59922	45	45	24	34	34	25	25	49	42	26	61	0	1	0
F1SRW7	Cilia and flagella associated protein 65 OS=Sus scrofa OX=9823 GN=CFAP65 PE=4 SV=3	198151	45	4	18	24	9	50	13	5	21	10	16	0	0	0
Q4R0H3	Spermadhesin AQN-1 OS=Sus scrofa OX=9823 GN=AQN-1 PE=2 SV=1	13989	44	41	224	56	103	550	64	79	527	46	105	62	5	2
F1RPA7	Glycoprotein 2 OS=Sus scrofa OX=9823 GN=GP2 PE=1 SV=3	58072	44	44	66	3	115	3	47	0	0	41	1	0	6	0
F1SCI9	Syntaxin-binding protein 2 OS=Sus scrofa OX=9823 GN=STXBP2 PE=1 SV=3	66467	44	44	20	0	62	7	16	0	1	15	2	0	1	0
F1RID8	Cilia and flagella associated protein 161 OS=Sus scrofa OX=9823 GN=CFAP161 PE=4 SV=2	37453	44	44	45	63	34	47	58	59	62	52	55	0	2	0
I3L9V2	Vesicle amine transport 1 OS=Sus scrofa OX=9823 GN=VAT1 PE=1 SV=1	42687	44	44	28	0	41	2	26	0	1	21	1	0	1	14
K7GM53	Serine/threonine-protein phosphatase OS=Sus scrofa OX=9823 GN=PPEF1 PE=3 SV=2	69552	44	44	35	2	36	0	17	0	0	23	0	0	1	0
A0A0B8RZ10	Ubiquitin-like modifier activating enzyme 1 OS=Sus scrofa domesticus OX=9825 GN=UBA1 PE=3 SV=1	117771	44	31	39	0	39	16	31	0	11	32	0	0	3	26
F1SA43	Family with sequence similarity 71 member D OS=Sus scrofa OX=9823 GN=FAM71D PE=4 SV=2	44240	44	44	87	48	41	94	46	37	56	44	52	3	4	0
A0A0B8S099	Citrate synthase OS=Sus scrofa domesticus OX=9825 GN=CS PE=3 SV=1	51630	44	44	7	0	42	0	26	0	0	27	2	10	9	23
A0A286ZJB1	Uncharacterized protein OS=Sus scrofa OX=9823 PE=4 SV=1	28164	44	44	49	79	61	86	49	118	66	60	128	3	8	0
Q0R678	DJ-1 protein OS=Sus scrofa OX=9823 GN=PARK7 PE=1 SV=1	19936	44	44	16	0	53	1	17	0	0	19	0	8	7	33
K7GND3	DExH-box helicase 9 OS=Sus scrofa OX=9823 GN=DHX9 PE=1 SV=2	149740	44	44	61	1	0	50	2	0	34	0	1	0	0	0
K9IVC8	Nardilysin convertase OS=Sus scrofa OX=9823 GN=NRD1_tv2 PE=1 SV=1	133163	44	44	49	9	6	47	17	3	15	19	9	0	0	0
P61292	Serine/threonine-protein phosphatase PP1-beta catalytic subunit OS=Sus scrofa OX=9823 GN=PPP1CB PE=1 SV=3	37187	43	8	83	76	87	73	85	45	63	81	63	3	13	0
F6Q109	Glutamine synthetase OS=Sus scrofa OX=9823 GN=GLUL PE=3 SV=1	42916	43	43	98	33	38	98	45	27	25	41	46	4	3	0
I3LD43	Cytosol aminopeptidase OS=Sus scrofa OX=9823 GN=LAP3 PE=1 SV=2	56047	43	43	29	1	38	1	28	0	0	33	1	13	8	18
F1RGN9	Tektin 1 OS=Sus scrofa OX=9823 GN=TEKT1 PE=4 SV=3	48356	43	42	15	44	30	16	18	56	24	21	70	0	0	0
F1SAR7	Uncharacterized protein OS=Sus scrofa OX=9823 GN=CLMN PE=1 SV=2	111102	43	43	24	0	40	3	21	1	0	19	3	0	0	0
A0A287AXS7	ADP/ATP translocase 3 OS=Sus scrofa OX=9823 GN=SLC25A6 PE=3 SV=1	32920	43	16	13	1	36	4	24	0	3	24	8	2	19	14
C1PIG4	cAMP-dependent protein kinase regulatory subunit type II alpha OS=Sus scrofa OX=9823 GN=PRKAR2A PE=1 SV=1	45125	42	29	94	5	81	39	61	8	12	63	12	0	9	0
C8C420	Solute carrier family 25 member 3 OS=Sus scrofa OX=9823 GN=SLC25A3 PE=2 SV=1	39990	42	42	19	6	55	3	27	0	2	33	2	1	7	3
Q2HYU2	ATP-dependent 6-phosphofructokinase muscle type OS=Sus scrofa OX=9823 GN=PFKM PE=2 SV=1	85327	42	1	42	2	46	11	20	2	1	23	1	0	1	4
A0A0B8RSC7	Proteasome (Prosome macropain) 26S subunit non-ATPase 3 OS=Sus scrofa domesticus OX=9825 GN=PSMD3 PE=4 SV=1	60967	42	42	9	0	52	4	9	0	10	10	4	0	0	3
Q8WNW3	Junction plakoglobin OS=Sus scrofa OX=9823 GN=Jup PE=2 SV=1	81850	42	34	20	18	16	8	64	29	17	57	18	8	88	51
A0A287AKT9	Cilia and flagella associated protein 65 OS=Sus scrofa OX=9823 GN=CFAP65 PE=4 SV=1	168974	42	1	17	22	10	48	12	5	19	10	14	0	0	0
F1S0J8	Keratin 14 OS=Sus scrofa OX=9823 GN=KRT14 PE=1 SV=1	44213	42	5	29	14	13	25	51	17	30	41	14	22	114	31
F1RPH0	Phosphoglycerate kinase OS=Sus scrofa OX=9823 GN=PGK1 PE=1 SV=3	44575	41	18	50	20	50	35	41	13	13	44	14	0	15	15
F1SQZ0	Phosphoinositide phospholipase C OS=Sus scrofa OX=9823 GN=PLCZ1 PE=4 SV=1	73754	41	41	36	10	53	13	26	7	7	32	13	0	2	0
F1SFT7	Uncharacterized protein OS=Sus scrofa OX=9823 PE=4 SV=2	54899	41	41	55	20	25	76	29	34	20	28	29	1	1	0
A0A287AGN3	Heat shock protein family A (Hsp70) member 4 like OS=Sus scrofa OX=9823 GN=HSPA4L PE=1 SV=1	108590	41	35	50	9	17	33	23	3	6	17	7	0	0	4
A0A286ZUI3	Eukaryotic translation elongation factor 1 alpha 1 OS=Sus scrofa OX=9823 GN=EEF1A1 PE=1 SV=1	46662	41	26	87	12	17	75	21	20	25	14	24	4	10	26
A0A287BJG7	Uncharacterized protein OS=Sus scrofa OX=9823 PE=4 SV=1	83277	41	40	34	1	47	2	91	0	0	95	1	0	14	0
P68137	Actin alpha skeletal muscle OS=Sus scrofa OX=9823 GN=ACTA1 PE=1 SV=1	42051	41	1	90	8	45	77	21	8	45	19	24	14	37	35
A0A287BQJ1	RAB11 binding and LisH domain coiled-coil and HEAT repeat containing OS=Sus scrofa OX=9823 GN=RELCH PE=1 SV=1	134628	41	41	38	0	44	0	25	0	0	21	0	0	0	0
F1RPD2	Ubiquinol-cytochrome c reductase core protein 2 OS=Sus scrofa OX=9823 GN=UQCRC2 PE=1 SV=3	48210	40	40	36	2	65	12	50	1	4	62	0	1	16	0
F1S498	Uncharacterized protein OS=Sus scrofa OX=9823 GN=LOC100525589 PE=4 SV=3	82579	40	20	25	0	32	0	59	0	1	59	0	0	4	0
C7AI81	Actin alpha 2 OS=Sus scrofa OX=9823 GN=ACTA2 PE=2 SV=1	42009	40	1	90	8	39	78	21	5	46	19	23	16	35	35
F1RPP5	Methyl-CpG binding domain protein 1 OS=Sus scrofa OX=9823 GN=MBD1 PE=4 SV=3	62072	40	40	19	44	10	17	27	31	47	28	31	0	0	0
F1RWJ6	Aminopeptidase OS=Sus scrofa OX=9823 GN=NPEPPS PE=1 SV=2	103624	40	40	9	0	18	0	9	0	0	9	0	0	0	31
A0A287A784	Uncharacterized protein OS=Sus scrofa OX=9823 GN=KRT8 PE=1 SV=1	54427	40	16	26	9	16	27	20	22	17	17	19	14	85	40
F1ST43	Acyl-CoA dehydrogenase very long chain OS=Sus scrofa OX=9823 GN=ACADVL PE=1 SV=3	70327	39	39	62	2	33	0	29	0	0	33	1	1	3	2
A0A287B4U1	Rab GDP dissociation inhibitor OS=Sus scrofa OX=9823 GN=GDI1 PE=1 SV=1	51105	39	29	7	0	28	1	15	0	2	15	1	2	2	42
F2Z558	Tyrosine 3-monooxygenase/tryptophan 5-monooxygenase activation protein zeta OS=Sus scrofa OX=9823 GN=YWHAZ PE=1 SV=3	27745	39	30	28	4	63	9	16	7	6	16	8	2	8	19
F1RH55	Vaccinia related kinase 3 OS=Sus scrofa OX=9823 GN=VRK3 PE=4 SV=2	52886	39	39	63	38	24	44	37	24	18	38	41	0	0	0
F1RRS3	N-ethylmaleimide sensitive factor vesicle fusing ATPase OS=Sus scrofa OX=9823 GN=NSF PE=1 SV=3	83546	39	39	11	0	42	3	16	0	1	11	0	0	0	6
A0A287AKY1	cAMP-dependent protein kinase type I-alpha regulatory subunit OS=Sus scrofa OX=9823 GN=PRKAR1A PE=4 SV=1	42921	39	36	40	4	48	18	27	1	2	28	6	0	9	0
F1RR24	Uncharacterized protein OS=Sus scrofa OX=9823 PE=4 SV=3	38263	39	39	68	1	40	7	48	6	1	46	4	0	0	0
A0A2C9F3F5	Uncharacterized protein OS=Sus scrofa OX=9823 GN=LOC396905 PE=4 SV=1	18094	39	20	36	69	336	124	49	183	147	41	208	7	3	2
F1RRU4	EF-hand calcium binding domain 3 OS=Sus scrofa OX=9823 GN=EFCAB3 PE=4 SV=1	49802	38	38	36	41	20	40	34	23	41	32	32	0	3	0
A0A076KRX0	Glyceraldehyde-3-phosphate dehydrogenase OS=Sus scrofa OX=9823 GN=GAPDH PE=2 SV=1	35769	38	1	67	27	42	57	39	22	21	34	29	6	10	16
F1SAF0	Dihydrolipoyl dehydrogenase OS=Sus scrofa OX=9823 GN=DLD PE=1 SV=1	54219	38	38	27	0	41	0	35	0	0	36	7	3	12	22
A0A0B8S0C2	Aldo-keto reductase family 1 member B1 (Aldose reductase) OS=Sus scrofa domesticus OX=9825 GN=AKR1B1 PE=4 SV=1	35867	38	36	17	0	51	14	11	0	12	12	3	3	3	46
F1SM62	RIB43A domain with coiled-coils 2 OS=Sus scrofa OX=9823 GN=RIBC2 PE=4 SV=3	44925	38	38	27	50	15	24	25	37	67	23	44	0	0	0
F1RRH7	Radial spoke head 9 homolog OS=Sus scrofa OX=9823 GN=RSPH9 PE=4 SV=1	31260	38	38	8	9	49	13	12	3	11	11	4	0	0	0
F1SB53	Uncharacterized protein OS=Sus scrofa OX=9823 GN=PSMC2 PE=1 SV=2	48634	38	38	29	0	44	8	19	0	7	18	0	0	0	0
F1RMC3	Exportin 7 OS=Sus scrofa OX=9823 GN=XPO7 PE=1 SV=3	123933	38	38	25	0	26	1	16	0	0	17	0	0	0	1
F1RLQ7	Uncharacterized protein OS=Sus scrofa OX=9823 GN=CCDC168 PE=4 SV=3	200440	38	38	36	0	1	25	5	2	1	9	6	0	0	0
F1SH89	Choline dehydrogenase OS=Sus scrofa OX=9823 GN=CHDH PE=1 SV=1	65527	37	37	60	1	45	0	51	0	0	61	0	0	0	0
K7GSI9	Uncharacterized protein OS=Sus scrofa OX=9823 GN=FHL1 PE=4 SV=2	38750	37	37	71	15	57	28	26	22	29	36	26	0	0	1
F1RZ12	T-complex 11 OS=Sus scrofa OX=9823 GN=TCP11 PE=4 SV=3	55552	37	36	31	30	26	21	30	30	3	27	48	0	4	1
F1SK95	Uncharacterized protein OS=Sus scrofa OX=9823 GN=CPOX PE=1 SV=2	49158	37	37	33	0	23	0	13	0	0	17	0	0	0	1
A0A287ATD0	Keratin 75 OS=Sus scrofa OX=9823 GN=KRT75 PE=1 SV=1	58738	37	2	14	30	27	21	81	51	31	83	37	37	241	97
P42099	Zona pellucida sperm-binding protein 2 OS=Sus scrofa OX=9823 GN=ZP2 PE=2 SV=2	79729	37	37	0	0	0	0	0	0	1	0	6	26	22	120
F2Z5J1	Uncharacterized protein OS=Sus scrofa OX=9823 GN=PSMC1 PE=1 SV=1	49185	37	35	21	0	33	7	11	0	2	11	0	0	0	0
A0A287BNS1	Chromosome 10 open reading frame 82 OS=Sus scrofa OX=9823 GN=C10orf82 PE=4 SV=1	28702	37	37	23	47	28	29	45	51	71	46	51	0	3	0
A0A218PI30	Exportin 1 OS=Sus scrofa domesticus OX=9825 GN=XPO1 PE=2 SV=1	123114	37	37	36	2	21	5	23	1	1	22	1	0	0	5
M3TYQ4	EFR3-like A OS=Sus scrofa OX=9823 GN=EFR3A PE=2 SV=1	92852	37	37	27	0	29	0	23	0	0	26	0	0	0	0
A0A287AXJ7	Inositol-3-phosphate synthase 1 OS=Sus scrofa OX=9823 GN=ISYNA1 PE=4 SV=1	60785	37	37	21	0	25	0	11	0	0	19	0	0	0	34
F1SHH9	1-aminocyclopropane-1-carboxylate synthase homolog (inactive) like OS=Sus scrofa OX=9823 GN=ACCSL PE=4 SV=3	64625	37	37	0	0	0	0	0	0	0	0	11	3	1	86
F2Z565	Solute carrier family 25 member 5 OS=Sus scrofa OX=9823 GN=SLC25A5 PE=1 SV=1	32955	37	8	13	1	36	4	23	0	2	24	9	3	16	11
A0A287A2G9	Keratin 71 OS=Sus scrofa OX=9823 GN=KRT71 PE=1 SV=1	57476	37	16	1	11	4	1	17	16	5	16	8	8	84	56
I6R469	Calcium binding tyrosine-(Y)-phosphorylation regulated transcript variant 3 OS=Sus scrofa OX=9823 GN=CABYR PE=2 SV=1	41275	36	16	52	9	43	27	39	9	0	42	9	1	3	0
Q8WNW8	Nexin-1 OS=Sus scrofa OX=9823 GN=PN-1 PE=2 SV=2	44084	36	35	77	1	20	74	1	5	31	1	6	4	0	0
Q6IMG8	Tepp OS=Sus scrofa OX=9823 GN=Tepp PE=2 SV=1	24840	36	3	46	63	22	33	47	33	63	38	56	1	7	0
F1RJ25	Fructose-bisphosphate aldolase OS=Sus scrofa OX=9823 GN=ALDOC PE=1 SV=2	39377	36	29	6	15	10	6	9	9	2	9	15	3	10	54
F1RX00	Amine oxidase OS=Sus scrofa OX=9823 GN=MAOA PE=1 SV=2	59803	36	36	41	7	49	0	31	0	0	21	0	0	6	0
A0A286ZQY6	Isocitrate dehydrogenase [NAD] subunit mitochondrial OS=Sus scrofa OX=9823 GN=IDH3A PE=1 SV=1	39651	36	36	52	1	43	3	40	0	0	35	4	6	6	4
Q07287	Zona pellucida sperm-binding protein 4 OS=Sus scrofa OX=9823 GN=ZP4 PE=1 SV=1	59334	36	36	0	0	0	0	0	0	4	0	21	48	29	139
A0A287B4P8	Proteasome 26S subunit ATPase 4 OS=Sus scrofa OX=9823 GN=PSMC4 PE=3 SV=1	47366	36	34	23	0	50	9	13	1	1	9	1	0	0	0
F1RTI5	Coiled-coil alpha-helical rod protein 1 OS=Sus scrofa OX=9823 GN=CCHCR1 PE=4 SV=3	96149	36	28	30	23	14	14	22	10	23	21	17	0	0	0
I3LLD5	Eukaryotic translation initiation factor 4A1 OS=Sus scrofa OX=9823 GN=EIF4A1 PE=1 SV=2	44492	36	23	31	25	18	31	23	17	18	17	25	0	6	7
M3VH37	ITPRIP like 1 OS=Sus scrofa OX=9823 GN=ITPRIPL1 PE=2 SV=1	62611	36	36	30	41	14	41	36	21	31	34	23	0	4	0
A0A287BJ16	Uncharacterized protein OS=Sus scrofa OX=9823 GN=LOC110255463 PE=1 SV=1	45713	35	35	21	1	29	0	30	0	0	31	7	8	11	11
F1RFS5	Uncharacterized protein OS=Sus scrofa OX=9823 GN=TEPP PE=4 SV=2	24842	35	2	45	63	21	32	48	32	63	39	57	1	7	0
A0A286ZMA6	Betaine--homocysteine S-methyltransferase 1 OS=Sus scrofa OX=9823 GN=BHMT PE=1 SV=1	43922	35	35	24	0	67	0	22	0	0	32	0	0	0	0
F1SF79	Schlafen like 1 OS=Sus scrofa OX=9823 GN=SLFNL1 PE=4 SV=3	44092	35	35	53	5	28	7	31	2	1	34	2	0	2	0
P62197	26S proteasome regulatory subunit 8 OS=Sus scrofa OX=9823 GN=PSMC5 PE=2 SV=1	45626	35	35	16	0	49	9	15	0	6	8	0	0	0	0
F1SL07	NADH:ubiquinone oxidoreductase subunit A9 OS=Sus scrofa OX=9823 GN=NDUFA9 PE=1 SV=2	42543	35	35	15	0	45	11	25	0	0	22	0	0	3	0
A0A287BPA2	Translocase of outer mitochondrial membrane 34 OS=Sus scrofa OX=9823 GN=TOMM34 PE=1 SV=1	34553	35	35	45	27	13	44	31	23	17	41	32	0	2	9
A0A286ZT52	Proteasome 26S subunit ATPase 3 OS=Sus scrofa OX=9823 GN=PSMC3 PE=1 SV=1	54806	35	35	27	0	43	16	22	0	7	19	0	0	1	3
A0A287BT68	Uncharacterized protein OS=Sus scrofa OX=9823 GN=LUZP2 PE=1 SV=1	38530	35	35	58	5	34	1	14	1	0	13	6	0	2	0
I3L8U6	Tudor domain containing 6 OS=Sus scrofa OX=9823 GN=TDRD6 PE=1 SV=2	237027	35	35	29	0	0	26	0	0	8	0	0	0	0	1
A0A287BMQ2	Actin related protein T3 OS=Sus scrofa OX=9823 GN=ACTRT3 PE=1 SV=1	41107	34	34	118	12	22	25	35	8	7	40	15	0	3	0
F1RIU3	Chaperonin containing TCP1 subunit 6B OS=Sus scrofa OX=9823 GN=CCT6B PE=3 SV=2	57894	34	12	34	10	73	26	37	14	6	34	18	0	5	1
D0G6X7	Dihydroxyacetone phosphate acyltransferase OS=Sus scrofa OX=9823 GN=GNPAT PE=2 SV=1	77268	34	3	40	41	24	20	39	24	2	36	23	0	1	0
F1RT97	Spermatogenesis-associated protein 20 OS=Sus scrofa OX=9823 GN=SPATA20 PE=1 SV=1	88538	34	34	45	36	23	33	35	26	26	29	22	0	0	0
D5K8A6	Sperm associated antigen 4-like protein OS=Sus scrofa OX=9823 GN=SPAG4L PE=2 SV=1	43833	34	34	44	42	22	40	27	27	27	35	35	1	0	0
F1RMZ8	ATPase H+ transporting V1 subunit B2 OS=Sus scrofa OX=9823 GN=ATP6V1B2 PE=3 SV=1	56613	34	34	31	1	37	3	23	0	1	30	1	0	1	5
A0A287AGL6	Radial spoke head 6 homolog A OS=Sus scrofa OX=9823 GN=RSPH6A PE=4 SV=1	82092	34	34	25	13	38	48	30	18	18	33	20	0	1	0
A0A287AEH4	Uncharacterized protein OS=Sus scrofa OX=9823 PE=4 SV=1	27523	34	31	68	11	34	51	25	24	19	38	35	2	3	0
Q28949	Epididymis-specific alpha-mannosidase OS=Sus scrofa OX=9823 GN=MAN2B2 PE=1 SV=2	114230	34	3	28	10	24	17	21	8	1	16	13	0	0	0
I3LHM6	Epididymis-specific alpha-mannosidase OS=Sus scrofa OX=9823 GN=MAN2B2 PE=4 SV=2	115185	34	3	28	10	23	17	20	10	1	15	11	0	0	0
P08059	Glucose-6-phosphate isomerase OS=Sus scrofa OX=9823 GN=GPI PE=1 SV=3	63126	34	34	4	0	32	1	15	0	0	14	0	0	0	23
A0A287BG14	Proteasome 26S subunit ATPase 6 OS=Sus scrofa OX=9823 GN=PSMC6 PE=1 SV=1	45855	34	32	23	0	31	10	12	0	6	16	1	0	1	2
C3RZ98	Protein arginine N-methyltransferase 5 OS=Sus scrofa OX=9823 GN=PRMT5 PE=1 SV=1	72614	34	34	16	0	31	1	11	0	0	7	0	0	0	0
F1S764	Uncharacterized protein OS=Sus scrofa OX=9823 GN=CPT2 PE=1 SV=1	73967	34	34	14	0	16	0	13	0	0	16	7	10	15	29
F1S0K2	Keratin 15 OS=Sus scrofa OX=9823 GN=KRT15 PE=1 SV=2	47368	34	1	10	16	16	10	27	23	14	20	13	15	155	45
F1RIP3	Ferritin OS=Sus scrofa OX=9823 GN=FTL PE=1 SV=2	19993	33	13	32	44	38	25	33	49	8	38	53	0	1	1
A0A287AHH1	NME/NM23 family member 7 OS=Sus scrofa OX=9823 GN=NME7 PE=3 SV=1	42481	33	33	49	51	21	46	39	44	78	37	51	0	8	0
A0A287AGG3	Proteasome subunit beta OS=Sus scrofa OX=9823 GN=PSMB5 PE=1 SV=1	30160	33	33	33	19	42	39	27	16	53	27	18	0	2	5
A0A287AR48	Succinate--CoA ligase [ADP-forming] subunit beta mitochondrial OS=Sus scrofa OX=9823 GN=SUCLA2 PE=1 SV=1	50304	33	32	52	1	23	0	31	0	0	34	0	0	3	0
F1SG38	Thioredoxin reductase 1 cytoplasmic OS=Sus scrofa OX=9823 GN=TXNRD1 PE=1 SV=3	54710	33	28	12	0	41	0	19	0	0	18	0	0	0	4
I3LNB4	Uncharacterized protein OS=Sus scrofa OX=9823 GN=ALDH4A1 PE=1 SV=2	61799	33	33	24	0	8	0	30	0	0	20	0	2	5	29
A0A287APQ3	Proteasome activator subunit 4 OS=Sus scrofa OX=9823 GN=PSME4 PE=4 SV=1	211346	33	33	14	0	23	1	17	0	3	11	0	0	0	0
K9IWD4	Hypoxia up-regulated protein 1 OS=Sus scrofa OX=9823 GN=HYOU1_tv1 PE=2 SV=1	111396	33	33	28	1	4	16	2	1	2	1	4	5	1	23
F1SL49	Tripartite motif containing 42 OS=Sus scrofa OX=9823 GN=TRIM42 PE=4 SV=2	77478	33	33	27	27	14	33	21	14	43	21	24	0	1	0
F1RRA6	Solute carrier family 25 member 31 OS=Sus scrofa OX=9823 GN=SLC25A31 PE=3 SV=2	33332	33	21	21	2	48	0	32	0	1	42	2	2	8	2
F1SAN2	Coiled-coil domain containing 105 OS=Sus scrofa OX=9823 GN=CCDC105 PE=4 SV=2	57067	33	33	25	21	28	14	11	4	12	18	47	0	0	0
A0A287AI67	Uncharacterized protein OS=Sus scrofa OX=9823 GN=DNAJA4 PE=1 SV=1	47860	33	33	13	1	39	3	16	1	1	11	4	0	0	0
G9F6X8	Protein disulfide-isomerase OS=Sus scrofa OX=9823 GN=P4HB PE=2 SV=1	56399	33	33	18	1	2	11	0	0	8	0	0	12	5	58
M3TYK5	Calcium-transporting ATPase OS=Sus scrofa OX=9823 GN=ATP2B4 PE=1 SV=1	133580	33	33	15	0	23	0	14	0	0	15	0	0	0	0
A0A287AQ90	Chromosome X open reading frame 57 OS=Sus scrofa OX=9823 GN=CXorf57 PE=4 SV=1	92699	33	33	9	14	8	28	20	12	54	16	25	0	0	0
P28491	Calreticulin OS=Sus scrofa OX=9823 GN=CALR PE=1 SV=3	48288	33	33	20	0	1	15	0	0	4	1	2	21	3	41
I3LJP1	Glutamine rich 2 OS=Sus scrofa OX=9823 GN=QRICH2 PE=4 SV=2	194874	33	33	23	0	6	12	9	0	0	10	1	0	0	0
I3LLY8	Keratin 79 OS=Sus scrofa OX=9823 GN=KRT79 PE=1 SV=1	57902	33	1	11	26	28	14	52	43	27	94	39	19	138	85
D9D839	Superoxide dismutase [Cu-Zn] OS=Sus scrofa OX=9823 GN=SOD1 PE=2 SV=1	15892	32	32	16	0	63	0	15	0	1	20	0	0	2	18
A0A287B7T2	Dihydroxyacetone phosphate acyltransferase OS=Sus scrofa OX=9823 GN=GNPAT PE=3 SV=1	77266	32	1	36	37	24	19	34	21	2	32	22	0	1	0
F1STB9	Testis expressed 37 OS=Sus scrofa OX=9823 GN=TEX37 PE=4 SV=1	20624	32	32	44	63	17	34	55	34	74	63	48	1	3	0
F2Z5G5	ARP1 actin related protein 1 homolog A OS=Sus scrofa OX=9823 GN=ACTR1A PE=1 SV=1	42614	32	15	30	1	52	12	14	2	1	18	7	0	0	0
F1S1R1	Cylicin 1 OS=Sus scrofa OX=9823 GN=CYLC1 PE=4 SV=2	74014	32	32	109	5	21	91	11	2	0	29	4	2	0	0
A0A286ZQ79	Adenylate kinase isoenzyme 1 OS=Sus scrofa OX=9823 GN=AK1 PE=1 SV=1	23416	32	32	37	1	35	1	18	0	0	28	2	0	6	0
A0A287BBB5	VAMP associated protein A OS=Sus scrofa OX=9823 GN=VAPA PE=1 SV=1	32235	32	4	105	7	49	60	39	13	2	32	11	0	4	2
I3L8L8	Uncharacterized protein OS=Sus scrofa OX=9823 PE=1 SV=2	57140	32	1	22	0	41	1	25	0	0	18	0	0	0	0
F1RGC9	Proteasome 26S subunit non-ATPase 13 OS=Sus scrofa OX=9823 GN=PSMD13 PE=1 SV=1	42867	32	32	11	0	41	1	14	0	1	15	1	0	0	0
A0A287A4T2	Electron transfer flavoprotein subunit alpha OS=Sus scrofa OX=9823 GN=ETFA PE=1 SV=1	35052	32	32	61	0	40	4	38	0	3	36	0	2	5	3
I3LP02	Acetyl-CoA acetyltransferase 1 OS=Sus scrofa OX=9823 GN=ACAT1 PE=1 SV=2	45330	32	32	15	0	28	2	20	0	7	29	4	19	13	14
P41367	Medium-chain specific acyl-CoA dehydrogenase mitochondrial OS=Sus scrofa OX=9823 GN=ACADM PE=1 SV=3	46485	32	32	19	1	27	12	24	0	0	28	1	8	12	23
A0A0B8RZA3	Prohibitin OS=Sus scrofa domesticus OX=9825 GN=PHB PE=4 SV=1	29804	32	32	10	17	38	0	9	8	0	15	15	0	15	5
A0A287AZF9	Cytochrome c1 OS=Sus scrofa OX=9823 GN=CYC1 PE=1 SV=1	35442	32	32	11	5	55	7	26	0	2	22	4	2	10	2
P11607	Sarcoplasmic/endoplasmic reticulum calcium ATPase 2 OS=Sus scrofa OX=9823 GN=ATP2A2 PE=1 SV=1	114792	32	32	38	15	7	23	16	12	11	8	12	0	0	0
F1SIX3	UTP--glucose-1-phosphate uridylyltransferase OS=Sus scrofa OX=9823 GN=UGP2 PE=1 SV=3	55680	32	32	10	0	29	0	11	0	0	19	0	0	1	35
A0A287A690	Peroxiredoxin-2 OS=Sus scrofa OX=9823 GN=PRDX2 PE=1 SV=1	25937	32	29	2	1	1	0	0	1	0	1	13	11	37	125
F1RNZ1	Cytochrome b-c1 complex subunit Rieske mitochondrial OS=Sus scrofa OX=9823 GN=LOC100522678 PE=1 SV=1	29454	31	31	19	0	38	2	26	0	0	32	0	0	7	0
A0A287AL41	Parkin coregulated OS=Sus scrofa OX=9823 GN=PACRG PE=4 SV=1	29373	31	31	28	32	50	31	27	39	13	24	71	1	3	0
F1SR76	Aspartyl aminopeptidase OS=Sus scrofa OX=9823 GN=DNPEP PE=1 SV=3	51883	31	31	22	4	38	10	18	0	7	23	3	0	2	4
F2Z5L7	Proteasome subunit alpha type OS=Sus scrofa OX=9823 GN=PSMA1 PE=1 SV=1	29556	31	31	28	3	48	23	14	8	39	24	10	0	5	11
I3LN27	PDZ domain containing 9 OS=Sus scrofa OX=9823 GN=PDZD9 PE=4 SV=2	29393	31	31	23	0	48	1	15	1	0	12	0	0	2	0
A0A287AV28	Glycerol-3-phosphate dehydrogenase [NAD(+)] OS=Sus scrofa OX=9823 PE=1 SV=1	37970	31	22	32	7	30	4	28	5	1	24	2	0	3	0
Q2XQV4	Aldehyde dehydrogenase mitochondrial OS=Sus scrofa OX=9823 GN=ALDH2 PE=2 SV=1	56921	31	29	24	0	15	5	19	0	10	21	2	4	6	6
A0A287BA23	Acetyl-coenzyme A synthetase OS=Sus scrofa OX=9823 GN=ACSS1 PE=1 SV=1	73521	31	31	30	0	17	0	31	0	0	36	1	0	2	0
F1SGF1	Proteasome 26S subunit non-ATPase 6 OS=Sus scrofa OX=9823 GN=PSMD6 PE=1 SV=3	52206	31	31	4	0	42	2	6	0	3	7	0	0	0	0
I3LPP4	Chromosome segregation 1 like OS=Sus scrofa OX=9823 GN=CSE1L PE=1 SV=2	110649	31	31	27	0	11	11	8	0	1	7	2	0	0	16
A0A287AW88	Sperm associated antigen 9 OS=Sus scrofa OX=9823 GN=SPAG9 PE=1 SV=1	145690	31	1	11	0	24	0	6	0	0	7	0	0	0	0
A0A0B8RZ38	Sperm associated antigen 9 OS=Sus scrofa domesticus OX=9825 GN=SPAG9 PE=4 SV=1	146089	31	1	11	0	24	0	6	0	0	7	0	0	0	0
F1S232	4-trimethylaminobutyraldehyde dehydrogenase OS=Sus scrofa OX=9823 GN=ALDH9A1 PE=1 SV=3	64727	31	31	2	0	21	0	12	0	1	10	0	0	1	39
Q866A8	Fertilin beta OS=Sus scrofa OX=9823 GN=FTNB PE=1 SV=1	81805	30	30	24	5	29	11	12	1	5	14	0	0	4	0
A0A287AC42	VAMP associated protein A OS=Sus scrofa OX=9823 GN=VAPA PE=1 SV=1	27718	30	2	82	7	45	46	38	13	2	31	11	0	4	2
I3LRS5	Aldehyde dehydrogenase 1 family member A1 OS=Sus scrofa OX=9823 GN=ALDH1A1 PE=1 SV=2	54842	30	28	38	9	16	27	17	11	12	8	17	0	0	0
B6UV57	Nitrogen fixation 1-like protein OS=Sus scrofa OX=9823 GN=NFS1 PE=1 SV=1	50401	30	30	34	0	31	0	39	0	0	30	0	0	1	0
F1SFH7	LIM domain containing preferred translocation partner in lipoma OS=Sus scrofa OX=9823 GN=LPP PE=1 SV=3	65650	30	30	37	8	19	35	21	10	7	20	8	0	0	0
F1S1A8	NADH:ubiquinone oxidoreductase core subunit S2 OS=Sus scrofa OX=9823 GN=NDUFS2 PE=1 SV=2	53641	30	30	15	3	32	6	26	0	0	30	1	0	2	0
Q9TVC1	V-type proton ATPase subunit H OS=Sus scrofa OX=9823 GN=ATP6V1H PE=2 SV=1	55850	30	30	10	4	36	3	10	4	0	15	5	0	0	0
F1SED0	Acyl-CoA dehydrogenase short/branched chain OS=Sus scrofa OX=9823 GN=ACADSB PE=1 SV=3	40690	29	29	47	2	25	4	41	0	3	48	1	0	6	0
F1SKK4	Transmembrane protein 89 OS=Sus scrofa OX=9823 GN=TMEM89 PE=4 SV=2	21905	29	29	122	67	64	92	65	44	55	63	71	2	14	0
F1SD45	cAMP-dependent protein kinase catalytic subunit alpha OS=Sus scrofa OX=9823 GN=PRKACA PE=3 SV=1	40601	29	29	25	0	47	2	13	0	0	31	1	0	3	0
A0A287AN37	Ras-related protein Rab-14 OS=Sus scrofa OX=9823 GN=RAB14 PE=4 SV=1	23897	29	27	18	1	44	9	13	2	2	12	2	0	1	4
F1RVN1	NADH dehydrogenase [ubiquinone] flavoprotein 1 mitochondrial OS=Sus scrofa OX=9823 GN=NDUFV1 PE=1 SV=1	50570	29	29	21	1	28	13	27	0	2	32	1	3	5	0
A0A287AA21	Uncharacterized protein OS=Sus scrofa OX=9823 GN=ECHS1 PE=1 SV=1	31236	29	29	38	1	41	4	18	2	3	22	2	0	3	2
I3LC15	Angiotensin-converting enzyme OS=Sus scrofa OX=9823 GN=LOC100515049 PE=3 SV=2	87515	29	28	20	0	31	6	18	0	1	18	1	0	0	0
F1RSL2	Spermatogenesis and centriole associated 1 OS=Sus scrofa OX=9823 GN=SPATC1 PE=1 SV=3	46263	29	24	44	8	25	6	17	5	1	12	7	0	4	0
A0A287AZA7	Uncharacterized protein OS=Sus scrofa OX=9823 GN=RPS27A PE=1 SV=1	17965	29	3	32	32	71	27	31	37	37	24	52	26	42	63
F1SIC8	TBC1 domain family member 21 OS=Sus scrofa OX=9823 GN=TBC1D21 PE=4 SV=1	39153	29	29	27	42	19	26	35	35	19	25	41	0	2	0
I3LC61	Uncharacterized protein OS=Sus scrofa OX=9823 PE=4 SV=2	47273	29	29	27	13	49	51	11	4	4	22	19	2	1	0
K7GSE0	Leucine zipper and EF-hand containing transmembrane protein 1 OS=Sus scrofa OX=9823 GN=LETM1 PE=1 SV=2	74499	29	29	17	0	33	0	17	0	0	16	0	0	0	0
A0A287B2K7	Pyridoxal dependent decarboxylase domain containing 1 OS=Sus scrofa OX=9823 GN=PDXDC1 PE=1 SV=1	86317	29	29	39	0	7	18	3	0	9	1	0	0	0	0
F1RFQ4	Piwi like RNA-mediated gene silencing 1 OS=Sus scrofa OX=9823 GN=PIWIL1 PE=1 SV=1	98541	29	29	36	0	2	32	2	0	12	0	0	0	0	1
K9IWF9	Ras GTPase-activating-like protein IQGAP1 OS=Sus scrofa OX=9823 GN=IQGAP1 PE=2 SV=1	189217	29	29	25	0	1	18	0	0	7	0	0	0	0	0
I3LHD4	Cilia and flagella associated protein 57 OS=Sus scrofa OX=9823 GN=CFAP57 PE=4 SV=2	130346	29	29	20	1	11	21	16	0	1	11	0	0	0	0
Q7YS28	Pyruvate carboxylase OS=Sus scrofa OX=9823 PE=2 SV=1	129612	29	29	18	0	4	0	25	0	0	19	0	0	1	0
F1SN51	Inositol polyphosphate-1-phosphatase OS=Sus scrofa OX=9823 GN=INPP1 PE=1 SV=1	44501	29	29	4	1	9	2	11	0	0	8	2	5	7	34
A0A287AL55	Alpha-1 4 glucan phosphorylase OS=Sus scrofa OX=9823 GN=PYGB PE=1 SV=1	96273	29	25	11	0	7	5	2	0	0	2	1	0	3	43
A0A287AG48	Keratin 7 OS=Sus scrofa OX=9823 GN=KRT7 PE=3 SV=1	51859	29	10	11	5	11	9	24	16	9	23	16	9	75	48
A0A286ZWR6	Oxoglutarate dehydrogenase like OS=Sus scrofa OX=9823 GN=OGDHL PE=1 SV=1	109992	29	16	11	0	9	0	13	0	1	15	4	8	11	16
C1JEX7	Sperm associated antigen 6 OS=Sus scrofa OX=9823 GN=SPAG6 PE=2 SV=1	55467	28	28	41	3	42	4	29	1	0	24	2	0	3	0
A0A287B423	Uncharacterized protein OS=Sus scrofa OX=9823 GN=SPESP1 PE=4 SV=1	39862	28	2	64	2	17	68	4	6	5	5	9	3	0	0
F2Z5N0	Proteasome subunit alpha type OS=Sus scrofa OX=9823 GN=PSMA6 PE=1 SV=1	27399	28	28	21	15	33	22	22	9	52	27	7	2	7	6
F1SSA1	Chromosome 1 open reading frame 56 OS=Sus scrofa OX=9823 GN=C1orf56 PE=1 SV=2	37745	28	28	120	1	6	244	6	2	25	5	3	20	0	0
A0A287BPI1	Electron transfer flavoprotein-ubiquinone oxidoreductase mitochondrial OS=Sus scrofa OX=9823 GN=ETFDH PE=1 SV=1	68636	28	28	26	1	24	0	37	0	0	30	0	0	2	0
F1RLB6	NSF attachment protein alpha OS=Sus scrofa OX=9823 GN=NAPA PE=1 SV=2	33292	28	28	21	8	29	19	10	8	6	11	9	1	1	1
F1SBA5	Proteasome subunit alpha type OS=Sus scrofa OX=9823 GN=PSMA8 PE=3 SV=1	27928	28	13	12	4	37	19	13	6	35	16	9	1	3	7
A0A287AB21	Uncharacterized protein OS=Sus scrofa OX=9823 GN=PPP4R1 PE=4 SV=1	99957	28	28	18	0	20	0	15	0	0	20	0	0	0	0
A0A287BL23	Isocitrate dehydrogenase [NADP] OS=Sus scrofa OX=9823 GN=IDH2 PE=3 SV=1	47760	28	26	24	0	25	3	32	0	2	31	0	0	3	0
A0A287B6J6	Heat shock protein family A (Hsp70) member 4 OS=Sus scrofa OX=9823 GN=HSPA4 PE=1 SV=1	95424	28	25	20	1	10	8	8	0	2	6	1	0	0	13
A0A286ZQ07	Solute carrier family 25 member 12 OS=Sus scrofa OX=9823 GN=SLC25A12 PE=1 SV=1	75031	28	25	8	0	19	0	14	0	0	16	0	0	1	1
I3LL69	Family with sequence similarity 81 member B OS=Sus scrofa OX=9823 GN=FAM81B PE=4 SV=2	46712	28	28	15	21	10	16	15	16	9	19	20	0	0	0
A0A286ZIE8	Solute carrier family 25 member 4 OS=Sus scrofa OX=9823 GN=SLC25A4 PE=1 SV=1	33026	28	3	13	1	30	4	22	0	2	22	4	2	9	8
A0A287BJ74	Regulator of G protein signaling 22 OS=Sus scrofa OX=9823 GN=RGS22 PE=4 SV=1	146840	28	28	12	0	9	27	8	0	0	9	0	0	0	0
A0A287AGB7	Cilia and flagella associated protein 61 OS=Sus scrofa OX=9823 GN=CFAP61 PE=4 SV=1	140487	28	28	9	10	15	15	12	3	4	8	9	0	0	0
F1RJX8	Coatomer subunit alpha OS=Sus scrofa OX=9823 GN=COPA PE=1 SV=1	138441	28	28	29	0	0	30	0	0	6	0	0	1	0	10
F1S598	Coiled-coil domain containing 151 OS=Sus scrofa OX=9823 GN=CCDC151 PE=4 SV=3	71995	28	28	13	0	10	13	9	0	0	14	0	0	0	0
A0A286ZND5	Uncharacterized protein OS=Sus scrofa OX=9823 GN=PRDX1 PE=1 SV=1	25050	28	24	16	1	1	12	0	2	6	2	1	2	18	60
F1RVJ6	Threonine synthase like 1 OS=Sus scrofa OX=9823 GN=THNSL1 PE=1 SV=3	86185	27	27	24	0	20	0	36	1	0	39	0	0	1	0
A0A1B2TT55	Aspartate aminotransferase OS=Sus scrofa OX=9823 GN=GOT1 PE=2 SV=1	46475	27	27	14	0	26	0	15	0	0	19	0	0	1	5
A0A287BPP9	Proteasome subunit beta OS=Sus scrofa OX=9823 GN=PSMB1 PE=1 SV=1	26330	27	27	21	10	32	25	29	15	44	30	13	1	8	7
K7GL74	Uncharacterized protein OS=Sus scrofa OX=9823 GN=PRPS2 PE=1 SV=2	34783	27	15	47	1	13	30	7	1	44	4	4	0	0	0
D5K893	Sperm equatorial segment protein 1 OS=Sus scrofa OX=9823 GN=SPESP1 PE=2 SV=1	39863	27	1	53	2	12	57	3	6	5	3	8	3	0	0
F2Z513	Cilia and flagella associated protein 20 OS=Sus scrofa OX=9823 GN=CFAP20 PE=4 SV=1	22748	27	27	6	14	27	5	7	30	5	5	48	0	0	0
A0A287AE08	Uncharacterized protein OS=Sus scrofa OX=9823 PE=1 SV=1	96870	27	22	18	0	24	4	39	1	0	37	2	0	2	0
F1RKR0	Protein phosphatase 1 regulatory subunit 32 OS=Sus scrofa OX=9823 GN=PPP1R32 PE=4 SV=2	47269	27	27	19	31	17	23	17	18	38	16	36	0	0	0
A0A287ANM8	Uncharacterized protein OS=Sus scrofa OX=9823 GN=GATD3A PE=1 SV=1	28826	27	27	31	0	30	0	23	0	0	22	0	0	0	0
P0CG68	Polyubiquitin-C OS=Sus scrofa OX=9823 GN=UBC PE=2 SV=1	59993	27	1	27	32	72	27	31	37	37	24	52	26	42	63
A0A286ZJK2	Heterogeneous nuclear ribonucleoprotein M OS=Sus scrofa OX=9823 GN=HNRNPM PE=1 SV=1	73589	27	3	37	0	0	28	1	0	14	0	0	0	0	0
I3LPT7	Sperm associated antigen 8 OS=Sus scrofa OX=9823 GN=SPAG8 PE=4 SV=2	48549	27	27	22	28	3	16	12	21	36	14	10	0	0	0
A0A286ZTB6	Uncharacterized protein OS=Sus scrofa OX=9823 GN=LOC110261265 PE=1 SV=1	27337	27	27	21	13	36	6	18	10	3	23	19	0	6	0
F1S0P7	Tetratricopeptide repeat domain 25 OS=Sus scrofa OX=9823 GN=TTC25 PE=4 SV=3	78584	27	27	19	1	15	20	8	1	1	10	0	0	0	0
A0A286ZMB2	Folate gamma-glutamyl hydrolase OS=Sus scrofa OX=9823 GN=GGH PE=1 SV=1	35429	27	27	13	0	44	0	13	13	0	9	20	0	3	0
A0A287B0C3	ATP synthase subunit d mitochondrial OS=Sus scrofa OX=9823 GN=ATP5PD PE=1 SV=1	19550	27	27	5	0	37	0	19	0	0	13	0	0	13	0
A0A286ZT91	Abhydrolase domain containing 16B OS=Sus scrofa OX=9823 GN=ABHD16B PE=4 SV=1	52367	27	27	21	22	12	23	19	13	22	24	19	0	0	0
K7GQ35	Uncharacterized protein OS=Sus scrofa OX=9823 GN=IGBP1 PE=1 SV=1	38993	27	27	12	7	24	9	8	12	8	9	16	0	0	0
F1S418	Uncharacterized protein OS=Sus scrofa OX=9823 GN=PRDX3 PE=1 SV=1	28471	27	26	2	0	0	0	0	0	2	6	17	60	32	49
F1RWT2	Plastin 3 OS=Sus scrofa OX=9823 GN=PLS3 PE=1 SV=3	63851	27	21	23	0	9	12	6	0	0	4	1	0	5	20
A0A286ZN09	Uncharacterized protein OS=Sus scrofa OX=9823 PE=4 SV=1	73962	26	2	66	37	49	42	31	45	18	29	53	1	2	0
D9U8D1	Dynein light chain OS=Sus scrofa OX=9823 GN=LC8 PE=1 SV=1	10366	26	9	86	27	61	57	36	32	16	49	45	7	14	52
C4TP28	Phosphatidylethanolamine-binding protein 4 OS=Sus scrofa OX=9823 GN=pebp4 PE=1 SV=1	25177	26	26	62	14	37	12	33	9	5	39	11	0	4	0
A1XQU1	Proteasome subunit beta type-7 OS=Sus scrofa OX=9823 GN=PSMB7 PE=2 SV=2	29980	26	26	17	2	27	8	13	4	10	10	3	0	2	2
H2BML0	Calcium-binding tyrosine phosphorylation-regulated protein variant 1 OS=Sus scrofa OX=9823 GN=CABYR PE=2 SV=1	46701	26	1	28	5	23	13	28	8	0	31	7	1	4	0
P54612	Serine/threonine-protein phosphatase 2A 65 kDa regulatory subunit A alpha isoform OS=Sus scrofa OX=9823 GN=PPP2R1A PE=2 SV=2	65323	26	17	27	2	19	8	12	0	2	12	1	0	0	1
Q8WNR3	Arylsulfatase A OS=Sus scrofa OX=9823 GN=AS-A PE=2 SV=2	53603	26	26	33	1	41	1	33	0	0	34	0	0	5	0
A0A287AR55	Fumarate hydratase mitochondrial OS=Sus scrofa OX=9823 GN=FH PE=1 SV=1	54749	26	26	16	1	13	0	11	0	0	22	2	1	4	7
I3LDC7	Isocitrate dehydrogenase [NADP] OS=Sus scrofa OX=9823 GN=IDH1 PE=1 SV=2	46777	26	24	13	0	27	2	20	0	0	21	0	0	2	6
F1RKW8	Proteasome 26S subunit non-ATPase 11 OS=Sus scrofa OX=9823 GN=PSMD11 PE=1 SV=2	47322	26	26	15	0	31	2	12	0	5	8	1	0	0	0
A0A287BBF3	3-hydroxyisobutyryl-CoA hydrolase mitochondrial OS=Sus scrofa OX=9823 GN=HIBCH PE=1 SV=1	40286	26	26	20	0	15	0	17	0	0	12	5	7	3	18
A0A286ZTC0	Uncharacterized protein OS=Sus scrofa OX=9823 GN=CDC14B PE=4 SV=1	57046	26	26	22	22	9	16	17	13	27	17	17	0	2	0
F1SIS9	NADH dehydrogenase [ubiquinone] 1 alpha subcomplex subunit 10 mitochondrial OS=Sus scrofa OX=9823 GN=NDUFA10 PE=1 SV=1	40421	26	26	13	0	38	5	16	0	0	19	0	3	2	0
I3LL86	Uncharacterized protein OS=Sus scrofa OX=9823 PE=4 SV=2	66728	26	2	41	2	35	4	9	0	0	7	1	0	2	0
K9IVR7	WD repeat domain 1 OS=Sus scrofa OX=9823 GN=WDR1 PE=2 SV=1	66187	26	26	9	1	15	5	10	0	1	9	3	0	0	34
K7GR26	Tripartite motif containing 45 OS=Sus scrofa OX=9823 GN=TRIM45 PE=4 SV=2	63550	26	26	23	21	3	19	11	10	23	14	18	0	0	0
P83686	NADH-cytochrome b5 reductase 3 (Fragment) OS=Sus scrofa OX=9823 GN=CYB5R3 PE=1 SV=1	30831	26	4	27	2	15	9	12	1	2	12	1	1	2	8
F1SEN2	Glutamate dehydrogenase 1 mitochondrial OS=Sus scrofa OX=9823 GN=GLUD1 PE=1 SV=1	61308	26	26	8	0	8	3	5	0	2	5	2	18	6	12
A0A287A3T5	Uncharacterized protein OS=Sus scrofa OX=9823 GN=LOC110257910 PE=1 SV=1	118175	26	13	12	0	17	4	11	0	3	10	0	0	1	9
F1SAE4	NME/NM23 family member 8 OS=Sus scrofa OX=9823 GN=NME8 PE=4 SV=3	58750	26	26	21	0	14	5	12	0	0	10	0	0	0	0
F1RZ80	Coiled-coil domain containing 40 OS=Sus scrofa OX=9823 GN=CCDC40 PE=4 SV=3	110615	26	26	7	1	18	11	5	0	3	7	3	0	0	0
C5I4T6	Phosphoenolpyruvate carboxykinase 2 OS=Sus scrofa OX=9823 GN=PCK2 PE=1 SV=1	70691	26	26	15	0	10	0	13	0	0	13	0	0	0	0
Q5D144	Transcription factor A mitochondrial OS=Sus scrofa OX=9823 GN=TFAM PE=2 SV=1	28726	26	26	29	1	14	32	17	0	41	15	1	0	2	0
F1S6Q0	Testis-specific serine kinase 6 OS=Sus scrofa OX=9823 GN=TSSK6 PE=2 SV=2	30211	26	26	12	17	7	15	7	18	17	9	16	0	3	0
A0A287AH93	Extended synaptotagmin 1 OS=Sus scrofa OX=9823 GN=ESYT1 PE=1 SV=1	115172	26	26	2	0	0	1	0	0	0	0	2	1	9	54
A0A286ZW24	Dmx like 2 OS=Sus scrofa OX=9823 GN=DMXL2 PE=1 SV=1	339566	26	26	14	0	14	0	2	0	0	1	0	0	0	0
F1RQ00	Uncharacterized protein OS=Sus scrofa OX=9823 PE=4 SV=3	86204	26	26	9	14	3	10	10	7	17	8	9	0	0	0
F1SGG4	Keratin 73 OS=Sus scrofa OX=9823 GN=KRT73 PE=3 SV=3	58788	26	1	5	12	11	7	25	14	5	27	14	12	65	48
F1RJW3	Cilia and flagella associated protein 45 OS=Sus scrofa OX=9823 GN=CFAP45 PE=4 SV=2	66484	26	26	3	2	26	4	2	0	5	2	11	0	0	0
K7GLP9	Uncharacterized protein OS=Sus scrofa OX=9823 GN=SMS PE=1 SV=2	41239	26	26	4	0	0	1	0	0	3	0	3	3	2	39
A0A287B7K6	Keratin 78 OS=Sus scrofa OX=9823 GN=KRT78 PE=1 SV=1	62608	26	5	10	22	10	21	68	20	41	61	9	39	149	60
F1RIE2	Damage specific DNA binding protein 1 OS=Sus scrofa OX=9823 GN=DDB1 PE=1 SV=2	125652	26	26	3	0	12	0	2	0	0	1	0	0	0	17
D5K890	Sperm acrosome associated 4 OS=Sus scrofa OX=9823 GN=SPACA4 PE=2 SV=1	13116	25	25	9	56	46	70	30	16	21	34	36	5	3	0
F2Z5K2	Proteasome subunit alpha type OS=Sus scrofa OX=9823 GN=PSMA5 PE=1 SV=1	26411	25	25	28	13	29	31	24	8	50	30	17	0	4	9
F1S7L6	UBX domain protein 6 OS=Sus scrofa OX=9823 GN=UBXN6 PE=1 SV=2	55592	25	25	40	27	13	50	22	15	14	20	22	0	1	0
A0A287A8I4	Methylcrotonoyl-CoA carboxylase 1 OS=Sus scrofa OX=9823 GN=MCCC1 PE=1 SV=1	77214	25	3	24	0	17	0	25	0	0	29	0	0	1	0
Q1G1K7	Isocitrate dehydrogenase [NAD] subunit mitochondrial OS=Sus scrofa OX=9823 GN=IDH3B PE=1 SV=1	42360	25	1	43	1	23	1	28	0	0	29	3	0	3	2
F1S2W6	Histidine triad nucleotide binding protein 3 OS=Sus scrofa OX=9823 GN=HINT3 PE=1 SV=2	20528	25	25	59	4	32	5	7	1	0	10	1	0	0	0
I3LER5	Cytochrome c oxidase subunit 4 isoform 1 mitochondrial OS=Sus scrofa OX=9823 GN=COX4I1 PE=1 SV=2	19641	25	25	2	7	39	1	9	10	0	9	11	0	8	1
A0A287AEH0	Proteasome 26S subunit non-ATPase 7 OS=Sus scrofa OX=9823 GN=PSMD7 PE=1 SV=1	37011	25	25	11	0	45	0	13	0	3	13	0	0	0	0
F1SKK1	Solute carrier family 25 member 20 OS=Sus scrofa OX=9823 GN=SLC25A20 PE=3 SV=1	32852	25	25	10	1	29	0	15	0	0	10	0	0	2	0
F1RJC1	Membrane metalloendopeptidase like 1 OS=Sus scrofa OX=9823 GN=MMEL1 PE=1 SV=3	88350	25	25	19	0	28	0	15	0	0	14	0	0	1	0
Q29549	Clusterin OS=Sus scrofa OX=9823 GN=CLU PE=1 SV=1	51775	25	25	30	16	34	12	17	7	4	16	7	2	3	0
A0A287A6Q0	Protein S OS=Sus scrofa OX=9823 GN=PROS1 PE=1 SV=1	74667	25	25	34	3	13	42	3	1	18	2	5	2	0	0
A0A287AL53	Abhydrolase domain containing 10 OS=Sus scrofa OX=9823 GN=ABHD10 PE=1 SV=1	33825	25	25	7	0	29	0	4	0	0	5	2	6	3	15
F1SAQ8	Adenylate kinase 7 OS=Sus scrofa OX=9823 GN=AK7 PE=4 SV=3	82887	25	25	20	0	13	11	12	0	0	11	0	0	0	0
A0A286ZM69	Uncharacterized protein OS=Sus scrofa OX=9823 GN=LOC100525409 PE=4 SV=1	80536	25	5	20	0	18	0	39	0	0	35	0	0	2	0
K9IVE3	Casein kinase 2 alpha 2 OS=Sus scrofa OX=9823 GN=CSNK2A2 PE=1 SV=1	41187	25	22	18	2	20	24	16	5	9	13	5	1	0	8
F1SSP4	Chaperonin containing TCP1 subunit 8 like 2 OS=Sus scrofa OX=9823 GN=CCT8L2 PE=3 SV=3	57807	25	25	11	10	11	28	9	6	6	7	16	0	0	0
F1RMV3	Uncharacterized protein OS=Sus scrofa OX=9823 GN=IRGC PE=4 SV=1	50322	25	25	25	15	13	30	7	12	2	12	17	0	0	0
F1SRY6	Phosphoinositide phospholipase C OS=Sus scrofa OX=9823 GN=PLCD4 PE=1 SV=3	87575	25	25	23	0	16	2	16	0	0	23	0	0	0	0
I3LS60	ATP-dependent (S)-NAD(P)H-hydrate dehydratase OS=Sus scrofa OX=9823 GN=CARKD PE=1 SV=2	36394	25	25	6	0	17	0	17	0	0	15	0	6	6	8
F1RKQ4	Triokinase/FMN cyclase OS=Sus scrofa OX=9823 GN=TKFC PE=1 SV=2	59234	25	25	11	0	22	1	10	0	0	13	0	0	0	0
A0A287BKT9	Syntaxin 2 OS=Sus scrofa OX=9823 GN=STX2 PE=3 SV=1	33310	25	25	5	0	28	0	1	0	0	3	0	0	0	0
I3LTX2	Uncharacterized protein OS=Sus scrofa OX=9823 GN=CEP70 PE=4 SV=2	72013	25	25	24	1	5	17	17	2	1	8	4	0	0	0
A0A287BL93	Heterogeneous nuclear ribonucleoprotein M OS=Sus scrofa OX=9823 GN=HNRNPM PE=1 SV=1	76070	25	1	33	0	0	23	1	0	13	0	0	0	0	0
I3LLY3	Uncharacterized protein OS=Sus scrofa OX=9823 GN=ACTN1 PE=1 SV=1	102322	25	10	27	0	0	13	0	0	6	0	0	2	3	10
F1STS5	Coiled-coil domain containing 81 OS=Sus scrofa OX=9823 GN=CCDC81 PE=4 SV=3	70053	25	10	19	7	12	12	5	0	8	5	10	0	0	0
A0A287BA78	Uncharacterized protein OS=Sus scrofa OX=9823 GN=CYB5B PE=1 SV=1	16199	24	24	34	37	23	8	27	21	7	27	25	0	1	0
F1RTJ0	Uncharacterized protein OS=Sus scrofa OX=9823 GN=LOC100154405 PE=3 SV=1	41868	24	19	25	15	30	23	18	13	2	17	19	0	4	0
A0A0B8S072	3-hydroxyisobutyrate dehydrogenase OS=Sus scrofa domesticus OX=9825 GN=HIBADH PE=4 SV=1	35392	24	24	17	1	33	0	23	0	0	26	1	20	12	19
P19133	Ferritin light chain (Fragment) OS=Sus scrofa OX=9823 GN=FTL PE=1 SV=1	8784	24	4	27	27	23	22	24	32	6	29	29	0	1	3
K4IWU4	Profilin OS=Sus scrofa OX=9823 PE=2 SV=1	14726	24	24	35	11	14	14	15	17	16	15	16	0	1	0
A9LFQ5	Cytochrome c oxidase subunit 2 OS=Sus scrofa OX=9823 GN=COX2 PE=3 SV=1	26300	24	4	12	22	36	23	21	11	4	23	18	2	6	1
F1RJL7	Uncharacterized protein OS=Sus scrofa OX=9823 PE=4 SV=3	86727	24	19	18	4	16	14	14	2	6	19	3	0	1	0
A0A173G6G7	Septin 10 OS=Sus scrofa OX=9823 PE=2 SV=1	52748	24	21	28	2	14	13	16	3	1	12	3	0	0	0
A0A286ZKH3	Uncharacterized protein OS=Sus scrofa OX=9823 GN=SPR PE=1 SV=1	28774	24	24	34	4	31	19	16	0	4	16	6	0	2	12
K0BVM3	Septin 12 OS=Sus scrofa OX=9823 PE=2 SV=1	41109	24	24	38	1	16	20	10	2	2	17	2	0	0	0
F1RGZ7	Outer dense fiber of sperm tails 3 OS=Sus scrofa OX=9823 GN=ODF3 PE=4 SV=3	27545	24	24	17	15	21	39	12	0	28	15	9	0	0	0
E2IUK7	DNAJB13 OS=Sus scrofa OX=9823 GN=DNAJB13 PE=2 SV=1	36058	24	24	7	4	21	12	17	6	16	10	10	0	0	0
I3LDC1	Succinate dehydrogenase [ubiquinone] iron-sulfur subunit mitochondrial OS=Sus scrofa OX=9823 GN=SDHB PE=1 SV=1	31585	24	24	11	0	19	1	24	0	0	21	0	4	4	0
A6M930	Eukaryotic translation initiation factor 4A isoform 2 OS=Sus scrofa OX=9823 GN=EIF4A2 PE=1 SV=1	46402	24	11	24	11	4	24	7	3	7	8	7	0	5	7
A0A286ZIC5	Tripartite motif containing 36 OS=Sus scrofa OX=9823 GN=TRIM36 PE=1 SV=1	82510	24	24	14	12	3	4	6	15	9	13	10	0	0	0
F1SPS7	Acylamino-acid-releasing enzyme OS=Sus scrofa OX=9823 GN=APEH PE=4 SV=2	81258	24	24	7	0	14	0	7	0	0	12	0	0	2	6
Q29387	Elongation factor 1-gamma (Fragment) OS=Sus scrofa OX=9823 GN=EEF1G PE=2 SV=2	49624	24	1	31	5	12	11	11	2	5	9	2	0	6	22
D3K5K2	Peptidylprolyl isomerase OS=Sus scrofa OX=9823 GN=FKBP4 PE=2 SV=1	51317	24	24	9	0	23	5	8	0	1	7	0	0	0	12
F1RPW9	Elongation factor 1-gamma OS=Sus scrofa OX=9823 GN=EEF1G PE=4 SV=2	48459	24	1	26	5	12	11	9	2	6	10	3	0	6	23
A0A286ZUW0	Glutamine--fructose-6-phosphate transaminase 1 OS=Sus scrofa OX=9823 GN=GFPT1 PE=1 SV=1	76738	24	24	29	1	1	13	0	1	8	0	2	0	0	3
F1RSN3	5-oxoprolinase ATP-hydrolysing OS=Sus scrofa OX=9823 GN=OPLAH PE=1 SV=3	136294	24	24	14	1	8	4	10	3	0	7	4	0	0	0
F1SGG5	Keratin 72 OS=Sus scrofa OX=9823 GN=KRT72 PE=3 SV=2	57537	24	2	4	13	18	7	24	28	8	23	20	14	64	35
F1S073	Annexin OS=Sus scrofa OX=9823 GN=ANXA2 PE=1 SV=2	38579	24	24	14	1	3	9	5	4	3	5	1	8	16	11
I3LNT6	Keratin 77 OS=Sus scrofa OX=9823 GN=KRT77 PE=3 SV=2	62898	24	8	11	20	9	21	68	18	41	61	11	42	147	58
A0A287AAP0	Uncharacterized protein OS=Sus scrofa OX=9823 GN=LOC100522130 PE=1 SV=1	34339	23	18	21	3	20	5	14	1	2	11	5	10	12	15
F1RPW8	Asparaginase like 1 OS=Sus scrofa OX=9823 GN=ASRGL1 PE=1 SV=3	32091	23	23	108	17	35	11	36	2	11	46	11	0	3	0
F1S297	Isocitrate dehydrogenase [NAD] subunit mitochondrial OS=Sus scrofa OX=9823 GN=IDH3G PE=1 SV=3	41265	23	19	35	1	26	0	25	0	0	22	1	0	1	0
F2Z5G3	Calmodulin 2 OS=Sus scrofa OX=9823 GN=CALM2 PE=1 SV=1	16838	23	16	6	12	33	3	14	18	2	22	29	5	3	3
F1RUI2	RIB43A domain with coiled-coils 1 OS=Sus scrofa OX=9823 GN=RIBC1 PE=4 SV=1	44528	23	23	4	17	11	2	3	36	4	3	37	0	0	0
A0A0A8IK66	Heparin-binding protein WGA16 OS=Sus scrofa OX=9823 GN=wga16 PE=1 SV=1	18211	23	21	56	19	36	119	15	40	133	7	61	16	2	0
A0A287ARR1	Ferritin OS=Sus scrofa OX=9823 GN=FTH1 PE=1 SV=1	21186	23	23	23	1	63	2	6	7	4	17	11	0	1	0
A0A287AYJ5	Uncharacterized protein OS=Sus scrofa OX=9823 GN=GAS6 PE=4 SV=1	74117	23	23	35	0	1	26	7	0	18	5	0	0	0	0
F1RRQ9	Lysozyme like 6 OS=Sus scrofa OX=9823 GN=LYZL6 PE=3 SV=1	16711	23	23	8	13	19	24	14	4	10	14	7	0	1	0
I3LVS2	Uncharacterized protein OS=Sus scrofa OX=9823 GN=LOC110255463 PE=3 SV=2	72616	23	23	13	7	19	11	5	10	5	7	18	0	0	0
F1S814	Phosphoglucomutase 1 OS=Sus scrofa OX=9823 GN=PGM1 PE=1 SV=3	61534	23	23	7	0	19	0	7	0	0	11	0	1	0	2
F1RNL3	Coiled-coil domain containing 63 OS=Sus scrofa OX=9823 GN=CCDC63 PE=4 SV=3	65946	23	23	5	0	17	8	9	0	0	10	0	0	0	0
F1SF27	Spermatogenesis associated 48 OS=Sus scrofa OX=9823 GN=SPATA48 PE=4 SV=3	49234	23	23	8	21	7	8	9	20	16	9	26	0	0	0
I6ZX61	Glycogen synthase kinase 3 beta variant 1 OS=Sus scrofa OX=9823 GN=GSK3B PE=1 SV=1	46760	23	17	26	6	8	9	14	1	2	19	1	0	0	0
F1SJQ5	NADH-cytochrome b5 reductase OS=Sus scrofa OX=9823 GN=CYB5R3 PE=1 SV=3	33957	23	1	24	2	10	9	12	1	2	12	1	1	2	7
F1SHY5	Uncharacterized protein OS=Sus scrofa OX=9823 GN=LOC100515176 PE=3 SV=3	40179	23	23	17	4	30	5	23	1	4	31	1	0	3	0
A5D9M6	Large proline-rich protein BAG6 OS=Sus scrofa OX=9823 GN=BAG6 PE=2 SV=1	118627	23	23	18	0	16	1	14	0	0	11	0	0	0	1
F1RNR9	WD repeat domain 66 OS=Sus scrofa OX=9823 GN=WDR66 PE=4 SV=3	136976	23	23	6	15	9	17	9	10	12	10	15	0	0	0
I3LQN4	Uncharacterized protein OS=Sus scrofa OX=9823 GN=PHB2 PE=1 SV=1	33388	23	23	7	19	22	0	14	11	1	13	18	0	13	2
A0A287AJR1	Uncharacterized protein OS=Sus scrofa OX=9823 PE=4 SV=1	82792	23	20	17	0	29	1	49	0	0	45	0	0	0	0
F1SU68	Cilia and flagella associated protein 70 OS=Sus scrofa OX=9823 GN=CFAP70 PE=4 SV=2	125865	23	23	20	0	5	13	14	1	0	8	1	0	0	0
A0A286ZM55	Uncharacterized protein OS=Sus scrofa OX=9823 PE=4 SV=1	115560	23	23	20	0	14	0	24	0	0	21	0	0	0	0
F1SND1	Uncharacterized protein OS=Sus scrofa OX=9823 GN=TXNDC8 PE=4 SV=3	13549	23	23	10	4	33	1	19	1	3	14	3	0	4	0
F1RK79	Testis-specific serine kinase 2 OS=Sus scrofa OX=9823 GN=TSSK2 PE=2 SV=1	40941	23	18	30	13	22	28	22	17	17	19	16	0	0	0
O46374	DNA topoisomerase 2-alpha OS=Sus scrofa OX=9823 GN=TOP2A PE=2 SV=1	174306	23	23	31	0	0	19	1	0	2	0	0	0	0	0
P79403	Neutral alpha-glucosidase AB OS=Sus scrofa OX=9823 GN=GANAB PE=1 SV=1	106662	23	23	24	0	4	16	1	1	2	0	4	2	0	19
F1SU45	Metalloendopeptidase OS=Sus scrofa OX=9823 GN=ASTL PE=4 SV=2	42968	23	23	0	0	0	0	0	0	4	6	16	33	24	24
F1SGN4	Importin 4 OS=Sus scrofa OX=9823 GN=IPO4 PE=4 SV=3	117685	23	23	23	9	5	14	9	2	5	7	8	0	0	0
F1SIT8	Kinesin-like protein OS=Sus scrofa OX=9823 GN=KIF23 PE=3 SV=3	110923	23	23	22	0	1	18	0	0	8	0	1	0	0	0
K9IVF7	X-prolyl aminopeptidase (Aminopeptidase P) 1 soluble OS=Sus scrofa OX=9823 GN=XPNPEP1 PE=1 SV=1	74669	23	23	10	0	18	2	9	0	1	10	0	0	0	0
I3LEF8	Hydroxysteroid 17-beta dehydrogenase 4 OS=Sus scrofa OX=9823 GN=HSD17B4 PE=1 SV=2	80041	23	2	11	0	0	5	1	0	3	1	0	13	4	8
A0A287A3A6	Patatin like phospholipase domain containing 7 OS=Sus scrofa OX=9823 GN=PNPLA7 PE=4 SV=1	149002	23	22	19	0	3	0	5	0	0	3	0	0	0	0
A5A8V9	Valyl-tRNA synthetase 2 OS=Sus scrofa OX=9823 GN=VARS2 PE=3 SV=1	140163	23	23	21	0	2	12	1	0	2	0	0	0	0	0
F1SSS0	Carbamoyl-phosphate synthase 1 OS=Sus scrofa OX=9823 GN=CPS1 PE=1 SV=3	154009	23	23	4	0	2	0	14	0	0	14	0	0	0	0
P00348	Hydroxyacyl-coenzyme A dehydrogenase mitochondrial OS=Sus scrofa OX=9823 GN=HADH PE=1 SV=2	34161	22	22	32	0	30	4	22	0	2	19	3	4	6	9
I3LPE2	Tubulin polymerization promoting protein family member 2 OS=Sus scrofa OX=9823 GN=TPPP2 PE=1 SV=2	18539	22	22	22	3	42	1	25	0	0	29	2	0	3	0
F1S7R5	Chromosome 19 open reading frame 71 OS=Sus scrofa OX=9823 GN=C19orf71 PE=4 SV=3	24867	22	22	19	43	21	23	25	53	38	25	61	0	4	0
A0A286ZN52	Proteasome subunit beta OS=Sus scrofa OX=9823 GN=PSMB3 PE=1 SV=1	23008	22	22	18	4	30	20	11	10	32	15	13	0	3	5
F1STD5	ARP1 actin related protein 1 homolog B OS=Sus scrofa OX=9823 GN=ACTR1B PE=1 SV=3	42161	22	5	22	1	33	6	10	2	1	11	5	0	0	0
F1RNM8	Glypican 2 OS=Sus scrofa OX=9823 GN=GPC2 PE=3 SV=3	63029	22	22	21	0	14	0	15	0	0	17	0	0	2	0
A0A287AT18	Proteasome subunit alpha type OS=Sus scrofa OX=9823 GN=PSMA7 PE=1 SV=1	27867	22	7	11	4	26	16	12	3	28	13	8	1	3	7
F1RWZ8	Uncharacterized protein OS=Sus scrofa OX=9823 GN=DUSP21 PE=3 SV=2	21119	22	18	23	28	15	19	22	24	30	25	23	0	4	0
I3LDJ2	Uncharacterized protein OS=Sus scrofa OX=9823 GN=SPATA19 PE=4 SV=1	17970	22	22	53	10	41	18	14	17	3	23	17	0	0	0
I3LCN1	Enolase 2 OS=Sus scrofa OX=9823 GN=ENO2 PE=1 SV=2	47197	22	2	5	2	17	0	5	23	0	6	14	38	28	4
F2Z536	Dynein light chain OS=Sus scrofa OX=9823 GN=DYNLL2 PE=1 SV=1	10350	22	11	34	18	48	20	20	31	12	30	28	3	14	99
K9IVC2	BAG family molecular chaperone regulator 5 isoform b OS=Sus scrofa OX=9823 GN=BAG5_tv3 PE=2 SV=1	50585	22	22	19	11	12	24	16	5	4	16	7	0	0	0
A0A287AX58	Uncharacterized protein OS=Sus scrofa OX=9823 PE=4 SV=1	65124	22	21	8	0	25	0	17	0	0	13	0	0	0	0
K7GNL4	Hydroxysteroid dehydrogenase like 2 OS=Sus scrofa OX=9823 GN=HSDL2 PE=1 SV=2	48217	22	22	30	1	15	2	33	1	2	27	2	5	3	0
Q4R0H6	Spermadhesin PSP-I OS=Sus scrofa OX=9823 GN=PSP-I PE=2 SV=1	14501	22	22	60	15	16	89	14	13	98	13	38	9	9	3
I3LT90	Methylcrotonoyl-CoA carboxylase 1 OS=Sus scrofa OX=9823 GN=MCCC1 PE=1 SV=2	65669	22	1	21	0	19	0	24	0	0	26	0	0	0	0
A7Y521	COP9 signalosome complex subunit 4 OS=Sus scrofa OX=9823 GN=COPS4 PE=2 SV=1	46269	22	22	17	9	14	9	8	13	2	6	16	0	0	8
I3LDE6	Rhophilin associated tail protein 1 like OS=Sus scrofa OX=9823 GN=ROPN1L PE=4 SV=1	24581	22	22	14	19	14	13	9	17	1	10	15	2	2	0
F1RT12	Trafficking protein particle complex 11 OS=Sus scrofa OX=9823 GN=TRAPPC11 PE=1 SV=3	128675	22	22	6	0	14	0	3	0	0	4	0	0	0	0
I3LGD9	Agrin OS=Sus scrofa OX=9823 GN=AGRN PE=1 SV=2	216437	22	22	20	0	0	27	0	0	5	0	0	0	0	0
A0A287B3T1	Uncharacterized protein OS=Sus scrofa OX=9823 GN=LOC100155249 PE=1 SV=1	61619	22	1	2	16	15	4	15	18	5	17	14	8	95	40
A0A286ZNN4	Uncharacterized protein OS=Sus scrofa OX=9823 GN=NDUFS3 PE=1 SV=1	30201	22	22	3	0	31	2	10	0	1	12	0	0	2	0
Q5S233	Mitochondrial associated cysteine-rich protein OS=Sus scrofa OX=9823 GN=SMCP PE=1 SV=1	11420	22	22	89	46	54	8	59	7	2	84	9	0	2	0
F1RUT4	Cathepsin F OS=Sus scrofa OX=9823 GN=CTSF PE=1 SV=1	51103	22	21	25	0	13	0	11	0	0	7	0	0	0	0
A0A286ZIE6	Enkurin TRPC channel interacting protein OS=Sus scrofa OX=9823 GN=ENKUR PE=4 SV=1	29891	22	22	7	8	17	6	3	0	9	4	14	0	1	0
I3LBF1	Serotransferrin OS=Sus scrofa OX=9823 GN=TF PE=3 SV=2	77622	22	16	8	3	3	13	2	3	4	0	1	9	1	2
Q6WSP6	Chaperonin 10 OS=Sus scrofa OX=9823 PE=2 SV=1	10932	22	2	3	0	19	0	7	0	0	7	9	25	28	27
F1SMZ6	Uncharacterized protein OS=Sus scrofa OX=9823 GN=HSPE1 PE=1 SV=1	10960	22	2	3	0	19	0	7	0	0	7	9	30	30	27
F1RRJ4	Exportin 5 OS=Sus scrofa OX=9823 GN=XPO5 PE=1 SV=2	135794	22	22	27	0	0	21	0	0	3	0	0	0	0	0
A0A1P8VJR2	Aminopeptidase OS=Sus scrofa OX=9823 GN=APN PE=2 SV=1	108830	22	22	14	0	9	0	7	0	0	5	0	0	0	0
Q28956	17beta-estradiol dehydrogenase OS=Sus scrofa OX=9823 PE=2 SV=1	80102	22	1	11	0	0	5	1	0	3	1	0	14	4	8
A0A287B5G9	AP complex subunit beta OS=Sus scrofa OX=9823 GN=AP1B1 PE=1 SV=1	103746	22	11	12	0	12	2	5	0	0	6	0	0	0	8
P00999	Seminal plasma acrosin inhibitor A1 OS=Sus scrofa OX=9823 PE=1 SV=1	7595	22	3	17	52	207	83	39	95	101	25	120	5	3	2
A0A1L1YNR3	Fatty acid synthase (Fragment) OS=Sus scrofa OX=9823 GN=FASN PE=4 SV=1	93507	22	1	28	0	0	19	0	0	15	0	0	0	0	0
F1SKI0	Myosin-11 OS=Sus scrofa OX=9823 GN=MYH11 PE=1 SV=3	197295	22	14	6	0	0	7	0	0	23	0	0	7	1	20
F1SDN7	Chromosome 2 open reading frame 70 OS=Sus scrofa OX=9823 GN=C2orf70 PE=4 SV=2	23443	22	22	6	20	18	8	8	31	18	11	51	0	0	0
P50578	Aldo-keto reductase family 1 member A1 OS=Sus scrofa OX=9823 GN=AKR1A1 PE=1 SV=3	36582	22	20	6	0	6	5	0	0	3	2	0	4	5	49
F1RPZ6	Cysteine-rich secretory protein 2 OS=Sus scrofa OX=9823 GN=CRISP2 PE=2 SV=2	27053	21	16	30	22	18	29	18	17	28	24	20	0	0	0
F1S0S5	Sperm acrosome associated 9 OS=Sus scrofa OX=9823 GN=SPACA9 PE=1 SV=2	25291	21	21	30	11	35	14	11	24	11	19	39	0	2	0
F2Z572	Uncharacterized protein OS=Sus scrofa OX=9823 GN=PRPS1 PE=1 SV=1	34834	21	3	35	1	15	19	5	1	27	7	4	0	0	0
A0A286ZRE9	CKLF like MARVEL transmembrane domain containing 2 OS=Sus scrofa OX=9823 GN=CMTM2 PE=4 SV=1	28331	21	21	17	0	59	0	21	0	0	25	0	0	0	0
K7GP28	Hydroxysteroid 17-beta dehydrogenase 10 OS=Sus scrofa OX=9823 GN=HSD17B10 PE=1 SV=1	30788	21	21	36	1	33	6	35	2	3	31	3	3	8	5
A0A287BIV4	Proteasome subunit alpha type OS=Sus scrofa OX=9823 GN=PSMA4 PE=1 SV=1	29484	21	21	23	8	34	22	16	8	22	12	12	0	3	2
B5KN75	Cytochrome c oxidase subunit 2 OS=Sus scrofa OX=9823 GN=COX2 PE=3 SV=1	26240	21	1	9	19	28	18	17	11	4	19	16	2	6	1
F1RKX1	Uncharacterized protein OS=Sus scrofa OX=9823 GN=SPACA3 PE=3 SV=2	18067	21	21	24	9	11	46	25	1	8	28	2	3	2	0
F1RKG8	Uncharacterized protein OS=Sus scrofa OX=9823 GN=PEBP1 PE=1 SV=1	20972	21	21	9	0	24	0	19	0	2	23	0	2	5	27
F1S4N2	NADH-cytochrome b5 reductase OS=Sus scrofa OX=9823 GN=CYB5R1 PE=1 SV=2	34145	21	21	31	6	20	3	15	1	0	13	2	0	0	0
K7GQK6	Casein kinase II subunit beta OS=Sus scrofa OX=9823 GN=CSNK2B PE=1 SV=1	27024	21	10	18	17	16	10	18	23	14	19	27	0	1	3
A0A287A9I6	SAMM50 sorting and assembly machinery component OS=Sus scrofa OX=9823 GN=SAMM50 PE=1 SV=1	51872	21	21	18	30	9	5	11	9	2	16	7	0	0	0
A0A288CG11	SH3 domain containing GRB2 like endophilin B1 OS=Sus scrofa OX=9823 GN=SH3GLB1 PE=1 SV=1	45075	21	21	8	0	16	2	4	0	0	4	0	0	0	0
B0LY44	Ornithine aminotransferase OS=Sus scrofa OX=9823 PE=2 SV=1	48477	21	1	28	0	12	0	16	0	0	13	0	0	0	1
A0A287BBB4	Ornithine aminotransferase OS=Sus scrofa OX=9823 GN=OAT PE=1 SV=1	53653	21	1	28	0	12	0	17	0	0	12	0	0	0	1
F1RFV5	Proteasome subunit beta OS=Sus scrofa OX=9823 GN=PSMB6 PE=1 SV=2	25692	21	21	11	4	16	13	7	5	17	11	7	1	3	2
F1S2D0	NAD(P) dependent steroid dehydrogenase-like OS=Sus scrofa OX=9823 GN=NSDHL PE=1 SV=1	40502	21	21	25	9	7	14	12	5	4	12	6	0	0	2
A0A287B4J2	Adenosylhomocysteinase OS=Sus scrofa OX=9823 GN=AHCY PE=3 SV=1	52680	21	20	4	0	20	2	2	0	2	5	0	0	1	16
A0A286ZP09	Armadillo repeat containing 3 OS=Sus scrofa OX=9823 GN=ARMC3 PE=4 SV=1	96722	21	21	17	0	16	1	5	0	0	7	0	0	0	0
P11708	Malate dehydrogenase cytoplasmic OS=Sus scrofa OX=9823 GN=MDH1 PE=1 SV=4	36454	21	21	4	0	17	0	6	0	0	12	0	0	1	27
A0A286ZWJ3	Uncharacterized protein OS=Sus scrofa OX=9823 GN=MATR3 PE=1 SV=1	96456	21	21	37	0	0	32	0	0	2	0	0	0	0	0
F1SNL7	Carnosine dipeptidase 2 OS=Sus scrofa OX=9823 GN=CNDP2 PE=1 SV=1	52734	21	21	19	0	11	6	4	0	1	9	0	0	0	0
I3L6Y1	Uncharacterized protein OS=Sus scrofa OX=9823 GN=TLE6 PE=4 SV=2	51079	21	21	0	0	0	0	0	0	0	0	10	2	3	52
A0A173G6H5	Septin 7 isoform 2 OS=Sus scrofa OX=9823 PE=2 SV=1	50680	21	21	21	0	8	13	8	0	2	12	4	0	0	0
F1S0U2	Cilia and flagella associated protein 77 OS=Sus scrofa OX=9823 GN=CFAP77 PE=4 SV=3	31623	21	21	17	11	15	10	7	2	11	4	23	0	0	0
A0A2C9F3A3	ATP synthase subunit O mitochondrial OS=Sus scrofa OX=9823 GN=ATP5PO PE=3 SV=1	23384	21	21	11	0	25	1	13	0	2	16	0	1	3	0
F1RX66	Glutathione reductase OS=Sus scrofa OX=9823 GN=GSR PE=1 SV=3	56202	21	21	4	0	4	0	4	0	0	7	0	9	8	32
F1RXG1	Uncharacterized protein OS=Sus scrofa OX=9823 GN=KRT27 PE=3 SV=2	49706	21	4	5	17	0	5	33	11	11	25	9	19	91	53
A0A0B8S047	Methylmalonyl CoA mutase OS=Sus scrofa domesticus OX=9825 GN=MUT PE=4 SV=1	83243	21	21	12	0	6	0	16	0	0	13	0	0	0	0
F1SLL4	DEAD (Asp-Glu-Ala-Asp) box polypeptide 4 OS=Sus scrofa OX=9823 GN=DDX4 PE=1 SV=3	79782	21	21	23	0	0	19	0	0	5	0	0	0	0	0
I3LGU2	Uncharacterized protein OS=Sus scrofa OX=9823 GN=CCDC114 PE=4 SV=2	80220	21	21	9	0	7	9	4	0	0	4	0	0	0	0
F1S982	Coatomer subunit beta OS=Sus scrofa OX=9823 GN=COPB1 PE=1 SV=3	107142	21	21	19	0	0	15	0	0	4	0	0	0	0	4
A0A287B7D9	EF-hand calcium binding domain 5 OS=Sus scrofa OX=9823 GN=EFCAB5 PE=4 SV=1	149841	21	21	11	0	6	0	3	0	0	8	0	0	0	0
F1S0Q1	Heat shock protein family B (small) member 9 OS=Sus scrofa OX=9823 GN=HSPB9 PE=3 SV=2	16987	20	20	62	55	12	47	53	26	41	40	34	3	7	0
A0A287AT21	Sorbitol dehydrogenase OS=Sus scrofa OX=9823 GN=SORD PE=1 SV=1	38049	20	20	52	1	0	28	1	0	29	0	0	0	0	0
P35496	Major seminal plasma glycoprotein PSP-II OS=Sus scrofa OX=9823 PE=1 SV=2	14816	20	3	164	29	17	162	27	16	85	19	48	10	5	0
F1RYU5	NAD(P)(+)--arginine ADP-ribosyltransferase OS=Sus scrofa OX=9823 GN=ART3 PE=1 SV=2	42646	20	10	18	1	32	5	20	1	5	13	0	0	2	0
F1S8I7	IZUMO family member 4 OS=Sus scrofa OX=9823 GN=IZUMO4 PE=4 SV=3	23770	20	20	22	10	39	2	18	2	0	25	3	0	5	0
F1SKJ0	RBR-type E3 ubiquitin transferase OS=Sus scrofa OX=9823 GN=ARIH2 PE=1 SV=1	57557	20	20	18	19	6	17	13	9	17	11	12	0	0	0
I7HD36	Sodium/potassium-transporting ATPase subunit alpha (Fragment) OS=Sus scrofa OX=9823 GN=atp1a1 PE=2 SV=1	112624	20	4	16	0	20	5	8	0	0	9	0	0	1	0
A0A287A0W4	Putative homeodomain transcription factor 1 OS=Sus scrofa OX=9823 GN=PHTF1 PE=4 SV=1	80993	20	18	18	2	8	12	14	1	4	17	4	0	0	0
A0A0B8RW24	ATP synthase subunit gamma OS=Sus scrofa domesticus OX=9825 GN=ATP5C1 PE=3 SV=1	32992	20	20	11	2	29	1	8	0	1	13	1	0	2	0
P62895	Cytochrome c OS=Sus scrofa OX=9823 GN=CYCS PE=1 SV=2	11704	20	20	9	0	34	0	12	0	0	11	0	2	4	5
P62936	Peptidyl-prolyl cis-trans isomerase A OS=Sus scrofa OX=9823 GN=PPIA PE=1 SV=2	17869	20	20	36	3	7	21	11	1	11	6	4	6	11	23
F1SSL6	Proteasome subunit alpha type OS=Sus scrofa OX=9823 GN=PSMA3 PE=1 SV=1	28433	20	20	8	3	19	11	6	5	16	12	3	1	2	3
K7GQS2	Uncharacterized protein OS=Sus scrofa OX=9823 GN=LOC100736569 PE=1 SV=7	46093	20	20	23	1	28	2	8	2	4	10	5	0	2	0
A0A287BF02	Dynein axonemal light intermediate chain 1 OS=Sus scrofa OX=9823 GN=DNALI1 PE=4 SV=1	29690	20	20	8	7	20	12	11	4	5	9	5	0	2	0
F1RIJ5	DnaJ heat shock protein family (Hsp40) member C11 OS=Sus scrofa OX=9823 GN=DNAJC11 PE=1 SV=3	63353	20	20	11	8	11	2	7	5	0	8	9	0	0	0
A0A0B8RZS5	Acyl-CoA synthetase long-chain family member 3 OS=Sus scrofa domesticus OX=9825 GN=ACSL3 PE=4 SV=1	80276	20	18	18	0	5	6	4	0	2	5	0	0	0	0
F1RRN6	Septin 4 OS=Sus scrofa OX=9823 GN=SEPT4 PE=1 SV=2	55178	20	18	31	1	8	16	7	2	0	14	4	0	1	0
Q6SEG5	Ubiquitin carboxyl-terminal hydrolase isozyme L1 OS=Sus scrofa OX=9823 GN=UCHL1 PE=2 SV=1	24859	20	20	2	0	6	0	2	0	0	3	0	5	2	33
F1SED5	Proline rich 30 OS=Sus scrofa OX=9823 GN=PRR30 PE=4 SV=2	42653	20	20	31	8	4	32	13	5	10	12	7	0	1	0
A0A287B1D0	Chromosome 9 open reading frame 135 OS=Sus scrofa OX=9823 GN=C9orf135 PE=4 SV=1	26780	20	20	8	15	3	6	21	18	15	13	12	0	0	0
F1RM85	ADAM metallopeptidase domain 7 OS=Sus scrofa OX=9823 GN=ADAM7 PE=1 SV=2	76758	20	20	17	0	12	8	2	0	0	1	0	0	0	0
A0A0B8RZ88	Prune exopolyphosphatase OS=Sus scrofa domesticus OX=9825 GN=PRUNE PE=4 SV=1	49947	20	20	13	0	16	0	8	0	0	8	0	0	0	0
F1SNW5	Uncharacterized protein OS=Sus scrofa OX=9823 PE=3 SV=3	40576	20	20	3	0	18	1	9	0	1	9	0	0	1	0
A0A287ALH7	Uncharacterized protein OS=Sus scrofa OX=9823 GN=LY6K PE=4 SV=1	17260	20	20	18	0	25	2	17	0	3	18	0	0	0	0
Q5US13	Mitochondrial carnitine palmitoyltransferase I OS=Sus scrofa OX=9823 PE=2 SV=1	88230	20	20	17	9	4	0	8	0	0	8	0	0	0	0
F1RIF8	6-phosphogluconate dehydrogenase decarboxylating OS=Sus scrofa OX=9823 GN=PGD PE=1 SV=3	52301	20	20	19	0	9	4	4	0	4	4	0	0	0	5
F1RRD6	Uncharacterized protein OS=Sus scrofa OX=9823 GN=PDCD6IP PE=1 SV=3	84454	20	20	13	0	5	12	3	1	4	2	2	0	0	8
F1SI77	Uncharacterized protein OS=Sus scrofa OX=9823 GN=CKMT1A PE=1 SV=1	46935	20	10	0	7	39	0	7	32	0	2	3	41	11	16
F1RZZ1	Uncharacterized protein OS=Sus scrofa OX=9823 GN=TBCD PE=1 SV=3	132418	20	20	7	0	8	1	1	0	0	1	1	0	0	8
F6PZX4	Uncharacterized protein OS=Sus scrofa OX=9823 GN=ACAA2 PE=1 SV=1	42752	19	19	22	0	11	1	11	0	0	13	0	0	0	0
F1S3H1	Aldehyde dehydrogenase 6 family member A1 OS=Sus scrofa OX=9823 GN=ALDH6A1 PE=1 SV=2	57704	19	19	18	0	5	1	9	0	5	10	0	1	0	2
A0A287A604	Galectin 3 binding protein OS=Sus scrofa OX=9823 GN=LGALS3BP PE=4 SV=1	60947	19	19	7	0	20	10	5	5	1	3	12	0	0	0
I3LQS0	Heterogeneous nuclear ribonucleoprotein K OS=Sus scrofa OX=9823 GN=HNRNPK PE=1 SV=2	48553	19	19	38	0	0	24	1	0	15	0	0	0	1	0
F1RLS7	Radial spoke head 14 homolog OS=Sus scrofa OX=9823 GN=RSPH14 PE=4 SV=3	37182	19	19	3	8	16	4	6	10	4	4	10	0	0	0
I3LBY7	Dipeptidase OS=Sus scrofa OX=9823 GN=DPEP3 PE=3 SV=2	48963	19	19	7	1	24	0	16	0	0	11	0	0	0	0
P62802	Histone H4 OS=Sus scrofa OX=9823 PE=1 SV=2	11367	19	19	12	2	12	18	8	25	32	5	25	0	10	7
A0A287A5F7	Serine/threonine-protein phosphatase 2A 65 kDa regulatory subunit A beta isoform OS=Sus scrofa OX=9823 GN=PPP2R1B PE=4 SV=1	84100	19	10	19	2	5	10	7	0	1	5	1	0	0	0
F1RLC5	Ferritin OS=Sus scrofa OX=9823 GN=FTMT PE=3 SV=2	27390	19	19	15	8	29	5	7	5	0	5	5	0	0	0
F2Z5B4	Heterogeneous nuclear ribonucleoprotein A3 OS=Sus scrofa OX=9823 GN=HNRNPA3 PE=1 SV=2	39595	19	18	29	0	0	19	0	0	8	0	1	0	0	0
K9IVW6	GLUT3 OS=Sus scrofa OX=9823 GN=SLC2A3 PE=1 SV=1	53963	19	19	13	0	21	0	23	0	0	17	0	0	2	0
F1S3C7	AP-1 complex subunit gamma OS=Sus scrofa OX=9823 GN=AP1G1 PE=1 SV=3	91397	19	19	12	0	12	2	1	0	0	0	0	0	0	0
Q8WNY6	Dynein light chain OS=Sus scrofa OX=9823 PE=2 SV=2	10882	19	2	33	14	32	20	17	22	11	26	23	3	10	32
P79274	Long-chain specific acyl-CoA dehydrogenase mitochondrial OS=Sus scrofa OX=9823 GN=ACADL PE=2 SV=1	47957	19	19	4	0	13	0	11	0	0	14	1	1	1	12
A0A287B8K8	Transmembrane protein 210 OS=Sus scrofa OX=9823 GN=TMEM210 PE=4 SV=1	13886	19	19	40	72	25	55	49	28	44	47	23	2	4	0
A0A287B1R6	Armadillo repeat containing 8 OS=Sus scrofa OX=9823 GN=ARMC8 PE=1 SV=1	66059	19	19	8	10	9	4	11	1	1	12	7	0	0	0
K7GMY4	Glomulin FKBP associated protein OS=Sus scrofa OX=9823 GN=GLMN PE=1 SV=2	65575	19	19	8	0	19	0	3	0	0	3	0	0	0	0
A0A286ZIH3	Elongation factor 1-alpha OS=Sus scrofa OX=9823 GN=LOC100620900 PE=1 SV=1	49666	19	8	10	1	5	18	2	6	5	1	8	2	3	27
A0A286ZPY2	Uncharacterized protein OS=Sus scrofa OX=9823 GN=LOC110260348 PE=3 SV=1	28739	19	1	45	66	21	67	27	53	54	47	71	6	7	15
A0A287B1Y2	Uncharacterized protein OS=Sus scrofa OX=9823 GN=LOC110260348 PE=3 SV=1	25659	19	1	43	66	21	67	27	53	54	47	71	6	7	16
F1RXF9	Keratin 25 OS=Sus scrofa OX=9823 GN=KRT25 PE=3 SV=1	49460	19	5	4	18	0	5	33	10	13	24	10	15	74	39
F1SL35	Uncharacterized protein OS=Sus scrofa OX=9823 PE=1 SV=3	25397	19	11	31	52	17	63	32	30	49	23	34	5	4	4
A0A287BTG4	Myosin IB OS=Sus scrofa OX=9823 GN=MYO1B PE=1 SV=1	124938	19	19	16	0	2	18	0	0	6	0	0	0	0	0
F1ST91	Serine/threonine kinase 31 OS=Sus scrofa OX=9823 GN=STK31 PE=4 SV=3	111816	19	19	18	0	0	20	0	0	5	0	0	0	0	0
F1SAZ0	Sperm associated antigen 17 OS=Sus scrofa OX=9823 GN=SPAG17 PE=4 SV=3	240877	19	19	12	0	2	11	2	0	0	5	0	0	0	0
F1RPE0	Oxysterol-binding protein OS=Sus scrofa OX=9823 GN=OSBP2 PE=3 SV=3	114914	19	18	8	0	7	0	1	0	0	3	0	0	0	0
I3LLQ8	AFG3 like matrix AAA peptidase subunit 2 OS=Sus scrofa OX=9823 GN=AFG3L2 PE=1 SV=2	87616	19	19	18	0	6	0	5	0	0	7	0	0	1	0
F1SDX3	Ral GTPase activating protein non-catalytic beta subunit OS=Sus scrofa OX=9823 GN=RALGAPB PE=1 SV=3	166373	19	19	4	0	9	0	2	0	0	1	0	0	0	0
A0A287BMT0	Uncharacterized protein OS=Sus scrofa OX=9823 GN=LOC100154312 PE=4 SV=1	56803	18	1	24	7	7	22	17	8	14	15	12	0	0	0
F1RKZ5	Uncharacterized protein OS=Sus scrofa OX=9823 GN=LOC100154312 PE=4 SV=2	58264	18	1	23	6	7	20	15	4	13	14	10	0	0	0
F1SJQ2	Septin 3 OS=Sus scrofa OX=9823 GN=SEPT3 PE=4 SV=2	35922	18	18	28	12	11	39	15	5	14	15	6	0	1	0
F1RI22	Uncharacterized protein OS=Sus scrofa OX=9823 GN=PSP-I PE=4 SV=3	14719	18	1	75	34	29	89	36	22	67	28	59	8	8	0
A0A286ZTX1	CutC copper transporter OS=Sus scrofa OX=9823 GN=CUTC PE=1 SV=1	29263	18	18	8	1	24	1	10	0	2	9	1	0	0	0
A0A287AJQ2	Phosphoglycerate mutase OS=Sus scrofa OX=9823 GN=PGAM1 PE=1 SV=1	28804	18	6	6	2	44	2	10	11	0	19	3	10	5	3
A0A287AP64	Short-chain-specific acyl-CoA dehydrogenase mitochondrial OS=Sus scrofa OX=9823 GN=ACADS PE=1 SV=1	42880	18	1	17	1	8	3	25	0	2	24	1	0	6	0
A0A287BEK4	NADH:ubiquinone oxidoreductase subunit V3 OS=Sus scrofa OX=9823 GN=NDUFV3 PE=1 SV=1	43166	18	17	9	0	16	0	16	0	0	16	0	0	0	0
Q5S3G4	Cytochrome c oxidase subunit 5B mitochondrial OS=Sus scrofa OX=9823 GN=COX5B PE=2 SV=1	13783	18	18	7	2	21	7	14	1	1	13	2	0	7	0
F1SPZ6	POC1 centriolar protein B OS=Sus scrofa OX=9823 GN=POC1B PE=4 SV=3	53458	18	18	12	11	5	14	5	9	6	10	8	0	0	0
A0A287AEJ8	Ubiquitin specific peptidase 4 OS=Sus scrofa OX=9823 GN=USP4 PE=1 SV=1	108738	18	17	15	0	18	4	12	0	0	12	0	0	0	0
F1SJU0	Uncharacterized protein OS=Sus scrofa OX=9823 PE=4 SV=3	31603	18	18	11	12	6	10	3	7	4	9	17	1	0	0
A0A286ZS69	Proteasome subunit beta OS=Sus scrofa OX=9823 GN=PSMB2 PE=1 SV=1	22780	18	18	13	0	19	12	4	1	13	5	2	0	1	1
P10775	Ribonuclease inhibitor OS=Sus scrofa OX=9823 GN=RNH1 PE=1 SV=1	49023	18	18	25	2	3	15	5	0	15	5	1	0	0	4
I3LMV8	ATP binding cassette subfamily B member 8 OS=Sus scrofa OX=9823 GN=ABCB8 PE=1 SV=2	77069	18	18	19	21	7	0	25	0	0	24	0	0	3	1
F1SB42	Ezrin OS=Sus scrofa OX=9823 GN=EZR PE=1 SV=2	69371	18	11	21	2	8	11	6	2	3	5	7	3	4	6
A0A286ZVL0	Heterogeneous nuclear ribonucleoprotein U OS=Sus scrofa OX=9823 GN=HNRNPU PE=1 SV=1	90666	18	18	29	0	0	18	0	0	6	0	0	0	0	0
A0A286ZWJ9	Succinate--CoA ligase [GDP-forming] subunit beta mitochondrial OS=Sus scrofa OX=9823 GN=SUCLG2 PE=3 SV=1	49503	18	17	19	0	13	0	12	0	1	12	0	0	2	0
F1S431	Uncharacterized protein OS=Sus scrofa OX=9823 GN=AARS PE=1 SV=3	105725	18	18	22	0	8	11	2	0	2	1	0	0	0	1
F1SDH5	Casein kinase 1 gamma 2 OS=Sus scrofa OX=9823 GN=CSNK1G2 PE=3 SV=2	47258	18	9	18	0	18	0	11	0	0	13	1	0	0	0
A5GFT5	Aminopeptidase-like 1 OS=Sus scrofa OX=9823 GN=NPEPL1 PE=1 SV=1	55656	18	18	9	0	12	4	3	0	8	4	0	0	0	9
F1RNC3	Protein interacting with cyclin A1 OS=Sus scrofa OX=9823 GN=PROCA1 PE=4 SV=3	42427	18	18	20	28	6	15	16	19	23	19	18	0	2	0
F1SGC2	Uncharacterized protein OS=Sus scrofa OX=9823 GN=CCDC39 PE=4 SV=2	110108	18	18	5	1	7	11	1	0	2	3	0	0	0	0
A0A287A9G0	LanC like 2 OS=Sus scrofa OX=9823 GN=LANCL2 PE=1 SV=1	51304	18	18	25	5	6	1	18	0	1	16	0	0	0	1
F1RV70	NADPH:adrenodoxin oxidoreductase mitochondrial OS=Sus scrofa OX=9823 GN=FDXR PE=1 SV=1	54193	18	18	19	0	6	0	13	0	0	19	0	3	1	0
A0A287BR34	Kinesin-like protein OS=Sus scrofa OX=9823 GN=KIF9 PE=3 SV=1	90030	18	18	10	0	9	16	8	0	2	7	0	0	0	0
F1S8D4	WD repeat domain 77 OS=Sus scrofa OX=9823 GN=WDR77 PE=1 SV=3	36975	18	18	13	0	10	4	9	0	0	7	0	0	0	0
A0A287AFA5	Uncharacterized protein OS=Sus scrofa OX=9823 PE=1 SV=1	37423	18	1	11	0	1	7	0	0	1	0	2	10	4	23
G3CKJ2	Glyceraldehyde-3-phosphate dehydrogenase (Fragment) OS=Sus scrofa OX=9823 GN=GAPDH PE=2 SV=1	29469	18	8	7	3	4	4	13	3	6	8	2	3	8	11
A0A287BG49	Short-chain-specific acyl-CoA dehydrogenase mitochondrial OS=Sus scrofa OX=9823 GN=ACADS PE=1 SV=1	42811	18	1	12	0	7	1	21	0	2	15	0	0	6	0
A0A287B6X7	Target of myb1 like 2 membrane trafficking protein OS=Sus scrofa OX=9823 GN=TOM1L2 PE=3 SV=1	52169	18	17	22	3	10	13	6	3	2	5	6	0	0	0
M3VK32	Serine/threonine-protein phosphatase OS=Sus scrofa OX=9823 GN=PPP4C PE=2 SV=1	35080	18	13	7	6	12	6	7	1	6	7	4	0	0	1
F1RZV0	Zinc finger protein 451 OS=Sus scrofa OX=9823 GN=ZNF451 PE=1 SV=2	119144	18	18	4	11	4	2	3	10	5	1	13	0	0	0
F1SJ70	Outer dense fiber of sperm tails 3 like 1 OS=Sus scrofa OX=9823 GN=ODF3L1 PE=4 SV=1	30635	18	18	3	6	7	3	3	4	0	2	21	0	0	0
A0A0B8RT78	Sodium/potassium-transporting ATPase subunit beta OS=Sus scrofa domesticus OX=9825 GN=ATP1B3 PE=3 SV=1	31752	18	18	9	0	10	0	11	0	0	12	0	0	3	0
I3L6Y6	AP complex subunit beta OS=Sus scrofa OX=9823 GN=AP2B1 PE=1 SV=2	101036	18	7	8	0	7	5	1	0	0	2	0	0	0	6
A0A0B8RVT7	Insulin-degrading enzyme OS=Sus scrofa domesticus OX=9825 GN=IDE PE=3 SV=1	118018	18	18	1	0	8	0	6	0	0	3	0	0	0	2
F1SA98	Tyrosine 3-monooxygenase/tryptophan 5-monooxygenase activation protein theta OS=Sus scrofa OX=9823 GN=YWHAQ PE=1 SV=3	27764	18	10	11	1	6	4	1	0	3	2	1	0	1	11
F1SM09	IQ motif containing with AAA domain 1 OS=Sus scrofa OX=9823 GN=IQCA1 PE=4 SV=3	96931	18	18	3	0	4	18	1	0	0	1	0	0	0	0
A0A287B088	Proteasome subunit beta OS=Sus scrofa OX=9823 GN=PSMB4 PE=1 SV=1	29053	17	17	24	5	32	19	13	7	26	14	14	0	4	4
F1RHM6	Coiled-coil domain containing 188 OS=Sus scrofa OX=9823 GN=CCDC188 PE=4 SV=3	33241	17	17	35	19	17	36	34	6	20	29	11	0	0	0
Q864V5	FUN14 domain-containing protein 2 OS=Sus scrofa OX=9823 GN=FUNDC2 PE=2 SV=1	20572	17	17	31	7	12	1	11	2	0	15	2	0	1	0
J9JIK8	Protein-L-isoaspartate O-methyltransferase OS=Sus scrofa OX=9823 GN=PCMT1 PE=3 SV=2	30294	17	17	16	0	17	1	10	1	2	6	0	0	0	3
A0A287BQ99	Uncharacterized protein OS=Sus scrofa OX=9823 GN=LOC110258345 PE=4 SV=1	51049	17	15	13	0	11	1	49	0	1	39	0	0	5	0
A0A287A4Z2	Superoxide dismutase OS=Sus scrofa OX=9823 GN=SOD2 PE=1 SV=1	24710	17	17	5	0	16	0	4	0	0	7	1	13	7	25
F1RKI3	Histidine triad nucleotide binding protein 1 OS=Sus scrofa OX=9823 GN=HINT1 PE=1 SV=1	13725	17	17	6	0	21	1	6	0	0	5	0	0	0	0
F1SH88	Uncharacterized protein OS=Sus scrofa OX=9823 GN=RACGAP1 PE=4 SV=2	59696	17	17	23	0	0	18	0	0	5	0	0	0	0	0
F1RK80	Testis-specific serine kinase 1 OS=Sus scrofa OX=9823 GN=TSSK1B PE=2 SV=1	41341	17	12	23	7	18	15	15	8	12	17	8	0	0	0
A0A287BL80	Mannose-6-phosphate isomerase OS=Sus scrofa OX=9823 GN=MPI PE=1 SV=1	46459	17	17	8	0	15	1	7	0	0	7	0	0	0	0
F1STL4	Serine and arginine rich splicing factor 4 OS=Sus scrofa OX=9823 GN=SRSF4 PE=1 SV=3	40728	17	17	16	0	11	0	9	0	0	11	0	0	0	0
Q2QLE3	Testin OS=Sus scrofa OX=9823 GN=TES PE=3 SV=1	47947	17	17	12	5	6	10	8	9	2	7	8	0	0	0
F1SL58	Dynactin subunit 2 OS=Sus scrofa OX=9823 GN=DCTN2 PE=1 SV=3	44504	17	17	11	0	16	0	9	0	0	8	0	0	0	0
Q8MIR4	Bifunctional coenzyme A synthase OS=Sus scrofa OX=9823 GN=COASY PE=1 SV=1	61749	17	17	14	0	6	1	7	0	0	8	0	0	0	0
F1SPF9	Coatomer subunit gamma OS=Sus scrofa OX=9823 GN=COPG1 PE=1 SV=3	96394	17	15	19	0	0	13	0	0	7	1	0	0	0	5
A0A0B8S051	Methylcrotonoyl-CoA carboxylase 2 (Beta) OS=Sus scrofa domesticus OX=9825 GN=MCCC2 PE=4 SV=1	61318	17	17	4	0	11	0	9	0	0	10	0	0	0	0
A0A287ASJ4	Casein kinase I isoform alpha OS=Sus scrofa OX=9823 GN=CSNK1A1 PE=1 SV=1	40590	17	17	17	5	7	14	8	3	5	11	8	0	0	0
F1S1V4	Coiled-coil domain containing 173 OS=Sus scrofa OX=9823 GN=CCDC173 PE=4 SV=2	66150	17	17	6	2	10	6	4	0	3	4	5	0	0	0
A0A286ZW70	Peptidyl-prolyl cis-trans isomerase OS=Sus scrofa OX=9823 GN=PPIB PE=1 SV=1	23785	17	17	9	0	4	7	0	1	3	0	0	2	2	17
F2Z5V0	tRNA-splicing ligase RtcB homolog OS=Sus scrofa OX=9823 GN=RTCB PE=3 SV=1	55210	17	17	13	2	0	18	2	2	3	2	2	0	0	0
F1RF34	Dynein regulatory complex subunit 7 OS=Sus scrofa OX=9823 GN=DRC7 PE=4 SV=3	103119	17	17	2	0	9	11	1	0	2	2	0	0	0	0
A0A287ARU7	Uncharacterized protein OS=Sus scrofa OX=9823 GN=YWHAE PE=1 SV=1	27419	17	15	20	1	4	6	3	2	2	4	2	1	4	21
F1RF56	Chromosome 1 open reading frame 158 OS=Sus scrofa OX=9823 GN=C1orf158 PE=4 SV=2	23274	17	17	7	13	4	4	4	16	11	7	20	0	0	0
F1SKQ0	DEAD-box helicase 17 OS=Sus scrofa OX=9823 GN=DDX17 PE=1 SV=3	70581	17	13	18	0	0	10	0	0	10	0	0	0	0	0
I3L847	IQ motif containing F1 OS=Sus scrofa OX=9823 GN=IQCF1 PE=4 SV=2	24434	17	15	13	2	1	19	7	6	6	7	18	0	0	0
F1SLY1	IQ motif and ubiquitin domain containing OS=Sus scrofa OX=9823 GN=IQUB PE=4 SV=2	93486	17	17	4	0	8	10	2	1	1	5	2	0	0	0
F1SSA6	Uncharacterized protein OS=Sus scrofa OX=9823 PE=1 SV=3	110716	17	10	20	0	0	13	2	0	11	1	0	3	0	2
F1SLU6	Ubiquitin carboxyl-terminal hydrolase OS=Sus scrofa OX=9823 GN=USP5 PE=1 SV=3	95903	17	17	17	0	5	9	4	0	4	2	0	0	0	2
P00336	L-lactate dehydrogenase B chain OS=Sus scrofa OX=9823 GN=LDHB PE=1 SV=3	36612	17	9	7	16	6	7	12	15	6	9	11	1	3	10
A0A287AVV2	Voltage-dependent anion-selective channel protein 1 OS=Sus scrofa OX=9823 GN=VDAC1 PE=1 SV=1	32072	17	12	7	22	6	7	11	11	4	9	17	2	12	7
F1SKY2	Nitrilase family member 2 OS=Sus scrofa OX=9823 GN=NIT2 PE=1 SV=3	31192	17	17	3	0	3	1	1	0	0	1	1	15	2	15
I3LJL2	von Willebrand factor A domain containing 8 OS=Sus scrofa OX=9823 GN=VWA8 PE=1 SV=2	205126	17	17	13	0	0	0	11	0	0	8	0	0	0	0
A0A287BPQ1	Nucleoporin 188 OS=Sus scrofa OX=9823 GN=NUP188 PE=1 SV=1	196099	17	2	11	0	6	0	7	0	0	8	0	0	0	0
I3LIC2	Leucine rich pentatricopeptide repeat containing OS=Sus scrofa OX=9823 GN=LRPPRC PE=1 SV=2	155981	17	17	2	0	0	0	0	0	1	0	0	4	2	14
A0A286ZPT0	Coatomer subunit beta' OS=Sus scrofa OX=9823 GN=COPB2 PE=1 SV=1	102346	17	17	8	0	0	6	0	0	6	0	0	1	1	11
A0A287A531	Annexin OS=Sus scrofa OX=9823 GN=ANXA5 PE=1 SV=1	36134	17	17	0	0	1	0	0	0	0	0	3	12	12	13
A0A287BM70	Uncharacterized protein OS=Sus scrofa OX=9823 PE=4 SV=1	16876	16	16	22	7	53	6	26	5	4	19	5	0	4	0
A0A287AE72	Uncharacterized protein OS=Sus scrofa OX=9823 GN=TEX101 PE=1 SV=1	27369	16	16	33	8	64	5	39	4	3	32	4	1	4	0
F1RPQ3	Proteasome 26S subunit non-ATPase 14 OS=Sus scrofa OX=9823 GN=PSMD14 PE=1 SV=3	34577	16	16	13	2	27	6	14	3	1	12	4	0	0	0
A0A287BFZ1	Chromosome 1 open reading frame 194 OS=Sus scrofa OX=9823 GN=C1orf194 PE=4 SV=1	19276	16	16	8	6	19	15	12	0	12	12	8	0	0	0
F1S227	Peptidyl-tRNA hydrolase 2 OS=Sus scrofa OX=9823 GN=PTRH2 PE=1 SV=1	19274	16	16	30	23	30	13	16	17	3	12	22	0	0	0
A5GFW9	Orthologue of H. sapiens chromosome 20 open reading frame 106 (C20orf106) OS=Sus scrofa OX=9823 GN=C17H20orf106 PE=4 SV=1	19441	16	16	69	4	15	45	20	4	10	23	6	1	1	0
H9N9G8	Lactate dehydrogenase C isoform 3 OS=Sus scrofa OX=9823 GN=LDHC PE=2 SV=1	10486	16	4	21	24	38	9	13	27	7	16	42	0	7	0
F1SGR0	Eukaryotic translation initiation factor 3 subunit M OS=Sus scrofa OX=9823 GN=EIF3M PE=1 SV=1	42516	16	16	19	17	3	14	11	19	3	8	20	0	0	0
A0A287B1I6	Heme oxygenase OS=Sus scrofa OX=9823 GN=HMOX2 PE=1 SV=1	35726	16	16	17	16	7	17	13	12	11	12	13	0	1	0
F1SR82	Galactosidase beta 1 like OS=Sus scrofa OX=9823 GN=GLB1L PE=3 SV=2	65587	16	15	13	0	24	1	15	0	0	14	0	0	0	0
A0A287BHE0	Radial spoke head component 1 OS=Sus scrofa OX=9823 GN=RSPH1 PE=4 SV=1	34529	16	16	7	2	16	16	11	1	6	9	3	0	2	0
A0A286ZXU8	LanC like 1 OS=Sus scrofa OX=9823 GN=LANCL1 PE=1 SV=1	45515	16	16	13	9	10	5	19	4	3	11	5	0	0	12
F1SP87	Uncharacterized protein OS=Sus scrofa OX=9823 PE=1 SV=3	15379	16	16	34	35	28	54	4	35	2	4	20	2	0	0
I3LPR1	Cancer/testis antigen 83 OS=Sus scrofa OX=9823 GN=CT83 PE=4 SV=2	14128	16	16	17	17	11	12	15	21	16	10	26	1	3	0
A0A287BL05	Heterogeneous nuclear ribonucleoprotein H1 OS=Sus scrofa OX=9823 GN=HNRNPH1 PE=1 SV=1	51221	16	9	22	0	1	20	0	1	15	0	1	0	0	0
A0A287BFP2	Adenylate kinase 8 OS=Sus scrofa OX=9823 GN=AK8 PE=3 SV=1	45947	16	16	9	2	19	16	7	0	6	5	3	0	0	0
F1RFI1	Elongation factor Tu OS=Sus scrofa OX=9823 GN=TUFM PE=1 SV=1	49451	16	16	15	0	4	3	9	0	3	15	1	2	2	5
I3LJE4	BTB domain containing 16 OS=Sus scrofa OX=9823 GN=BTBD16 PE=4 SV=2	57601	16	16	11	10	4	16	12	8	2	12	8	0	0	0
Q6UAQ8	Electron transfer flavoprotein subunit beta OS=Sus scrofa OX=9823 GN=ETFB PE=1 SV=3	27764	16	16	20	1	8	1	6	1	1	5	1	0	3	0
A0A287AH85	Adenylate kinase 2 mitochondrial OS=Sus scrofa OX=9823 GN=AK2 PE=1 SV=1	25640	16	16	17	0	16	0	6	0	0	5	0	2	1	7
M3UZ37	Heterogeneous nuclear ribonucleoprotein A2/B1 OS=Sus scrofa OX=9823 GN=HNRNPA2B1 PE=1 SV=1	36006	16	16	24	0	1	15	0	0	10	0	0	0	0	0
F1RF11	Uncharacterized protein OS=Sus scrofa OX=9823 GN=MMP2 PE=1 SV=3	65621	16	1	17	0	0	18	0	0	4	0	0	0	0	0
E1CAJ6	Protein disulfide isomerase P5 OS=Sus scrofa OX=9823 GN=pdi-p5 PE=1 SV=1	48074	16	16	4	0	0	1	0	0	0	0	0	4	2	29
A0A287BR84	Dolichyl-diphosphooligosaccharide--protein glycosyltransferase subunit 1 OS=Sus scrofa OX=9823 GN=RPN1 PE=3 SV=1	75733	16	16	21	0	3	5	1	0	7	1	0	0	8	6
A0A287BF94	Cathepsin B OS=Sus scrofa OX=9823 GN=CTSB PE=1 SV=1	40511	16	16	10	2	4	3	1	1	3	1	2	2	0	13
Q95JA4	Gelatinase A OS=Sus scrofa OX=9823 GN=MMP-2 PE=2 SV=1	73670	16	1	14	0	0	16	0	0	5	0	0	0	0	0
F1RFQ7	GTP-binding nuclear protein Ran OS=Sus scrofa OX=9823 GN=RAN PE=1 SV=2	24423	16	16	19	3	4	16	5	11	5	7	12	0	2	5
F1STV0	Prolylcarboxypeptidase OS=Sus scrofa OX=9823 GN=PRCP PE=1 SV=2	56013	16	16	9	0	9	0	8	0	0	6	0	0	0	0
I3LBB2	Vacuolar protein sorting-associated protein 35 OS=Sus scrofa OX=9823 GN=VPS35 PE=1 SV=2	91693	16	16	17	0	0	5	0	0	1	0	0	0	0	8
F1S6P4	Growth arrest specific 8 OS=Sus scrofa OX=9823 GN=GAS8 PE=4 SV=3	55962	16	16	1	0	15	2	1	0	0	4	0	0	0	0
F1RWP0	Phosphoribosyl pyrophosphate synthetase associated protein 1 OS=Sus scrofa OX=9823 GN=PRPSAP1 PE=1 SV=1	42436	16	14	13	0	8	4	1	0	7	3	0	0	0	2
F1SAL9	Trafficking protein particle complex 8 OS=Sus scrofa OX=9823 GN=TRAPPC8 PE=4 SV=2	153865	16	16	3	0	12	0	4	0	0	0	0	0	0	0
I3LND9	Uncharacterized protein OS=Sus scrofa OX=9823 PE=4 SV=2	135460	16	16	8	6	0	11	4	1	12	7	4	0	0	0
I3LCP8	Serpin family B member 6 OS=Sus scrofa OX=9823 GN=SERPINB6 PE=1 SV=2	42869	16	15	8	0	7	1	3	1	1	4	3	2	2	12
F1RQI7	Unconventional myosin-VI OS=Sus scrofa OX=9823 GN=MYO6 PE=1 SV=1	144927	16	16	8	0	5	2	0	0	0	0	2	0	0	12
A0A287AK64	Cilia and flagella associated protein 54 OS=Sus scrofa OX=9823 GN=CFAP54 PE=4 SV=1	349253	16	16	12	0	3	2	9	0	0	4	0	0	0	0
F1SAB6	Acyl carrier protein OS=Sus scrofa OX=9823 GN=NDUFAB1 PE=1 SV=2	17289	16	16	16	3	21	1	4	4	1	8	6	0	0	0
F1SQ01	Peroxiredoxin 4 OS=Sus scrofa OX=9823 GN=PRDX4 PE=1 SV=1	30555	16	11	11	0	3	5	2	2	3	3	4	4	8	25
A0A0B8RVD2	Tyrosine 3-monooxygenase/tryptophan 5-monooxygenase activation protein beta OS=Sus scrofa domesticus OX=9825 GN=YWHAB PE=3 SV=1	28112	16	9	8	1	9	1	1	0	1	2	0	0	1	8
A0A287A1A7	UBX domain protein 11 OS=Sus scrofa OX=9823 GN=UBXN11 PE=4 SV=1	50511	16	16	9	1	6	5	10	2	0	8	2	0	0	0
F1SBI2	Barrier to autointegration factor 2 OS=Sus scrofa OX=9823 GN=BANF2 PE=4 SV=1	10231	16	16	21	13	6	18	10	9	16	13	10	0	1	0
A0A287B941	Phosphodiesterase OS=Sus scrofa OX=9823 GN=PDE10A PE=3 SV=1	81196	16	16	7	0	8	0	7	0	0	7	1	0	0	0
F1S770	Uncharacterized protein OS=Sus scrofa OX=9823 GN=MROH7 PE=4 SV=3	120244	16	15	11	2	10	2	5	0	0	2	0	0	0	0
F1RJZ6	Spermatid associated OS=Sus scrofa OX=9823 GN=SPERT PE=4 SV=2	49393	16	16	20	0	0	13	1	2	10	2	2	0	0	0
A0A287BLV6	Bactericidal permeability increasing protein OS=Sus scrofa OX=9823 GN=BPI PE=1 SV=1	53251	16	16	12	0	2	10	0	1	5	0	4	0	0	0
A0A287AY61	Coiled-coil domain containing 81 OS=Sus scrofa OX=9823 GN=CCDC81 PE=4 SV=1	41330	16	1	12	6	5	9	4	0	7	5	5	0	0	0
A0A287BSG9	Nucleoporin 188 OS=Sus scrofa OX=9823 GN=NUP188 PE=1 SV=1	191344	16	1	10	0	5	0	5	0	1	6	0	0	0	0
I3LAB6	Proteasome subunit alpha type OS=Sus scrofa OX=9823 GN=PSMA2 PE=1 SV=1	25899	15	15	17	2	24	14	16	3	18	13	6	0	4	4
E7FM66	Disintegrin and metalloprotease domain-containing protein 5 (Fragment) OS=Sus scrofa OX=9823 GN=ADAM5 PE=2 SV=1	45197	15	15	15	0	17	2	10	0	0	11	0	0	3	0
A0A287B574	Succinate--CoA ligase [ADP/GDP-forming] subunit alpha mitochondrial OS=Sus scrofa OX=9823 GN=SUCLG1 PE=3 SV=1	35534	15	15	34	3	21	1	35	0	1	21	2	0	10	2
A0A286ZRQ7	Uncharacterized protein OS=Sus scrofa OX=9823 PE=4 SV=1	17370	15	15	10	4	24	3	12	6	2	11	6	0	3	0
A0A286ZYL7	ATP synthase subunit delta mitochondrial OS=Sus scrofa OX=9823 GN=ATP5F1D PE=1 SV=1	17475	15	15	3	0	18	0	2	0	0	4	0	0	0	0
A5A4F6	ADAM3a OS=Sus scrofa OX=9823 PE=2 SV=1	82947	15	15	10	0	16	1	17	0	0	20	0	0	2	0
A0A287ASY9	Serine racemase OS=Sus scrofa OX=9823 GN=SRR PE=4 SV=1	35699	15	15	12	2	20	3	6	1	0	10	5	0	0	0
P67776	Serine/threonine-protein phosphatase 2A catalytic subunit alpha isoform OS=Sus scrofa OX=9823 GN=PPP2CA PE=2 SV=1	35594	15	1	11	2	15	9	7	1	3	7	3	0	0	2
F1RX68	Serine/threonine-protein phosphatase OS=Sus scrofa OX=9823 GN=PPP2CB PE=3 SV=3	35575	15	1	12	2	14	9	7	1	3	7	3	0	0	2
A0A287B820	Quinone oxidoreductase OS=Sus scrofa OX=9823 GN=CRYZ PE=4 SV=1	31621	15	15	4	0	13	3	8	1	0	9	3	1	0	12
F1SF92	Zinc finger MYND-type containing 12 OS=Sus scrofa OX=9823 GN=ZMYND12 PE=4 SV=3	42973	15	15	2	3	16	1	7	1	0	4	1	0	0	0
F1SMM8	Family with sequence similarity 71 member F2 OS=Sus scrofa OX=9823 GN=FAM71F2 PE=4 SV=3	33158	15	15	22	11	3	18	12	5	2	13	6	0	0	0
I3LT95	Proteasome assembly chaperone 1 OS=Sus scrofa OX=9823 GN=BRWD1 PE=1 SV=2	32825	15	15	23	14	5	25	11	9	24	19	8	0	0	0
F1RVW9	Uncharacterized protein OS=Sus scrofa OX=9823 PE=4 SV=3	70631	15	15	7	10	3	11	2	8	6	4	13	0	0	0
I3LTC6	Inositol-1-monophosphatase OS=Sus scrofa OX=9823 GN=IMPA1 PE=3 SV=2	30205	15	15	3	0	26	0	8	0	0	14	0	0	0	3
F1RJB2	Uncharacterized protein OS=Sus scrofa OX=9823 GN=UBQLNL PE=4 SV=1	66616	15	15	12	13	5	20	12	6	5	10	16	0	1	0
Q9GJT2	S-formylglutathione hydrolase OS=Sus scrofa OX=9823 GN=ESD PE=2 SV=1	31482	15	15	16	0	12	3	6	0	3	10	0	0	0	6
P51779	Complement factor D OS=Sus scrofa OX=9823 GN=CFD PE=2 SV=1	27764	15	15	25	2	3	11	5	0	9	4	2	0	0	0
F1SIP5	Uncharacterized protein OS=Sus scrofa OX=9823 GN=FSCB PE=4 SV=1	83660	15	15	11	0	5	0	4	0	0	8	0	0	0	0
F1RJP5	Serine protease 55 OS=Sus scrofa OX=9823 GN=PRSS55 PE=3 SV=2	37744	15	15	16	1	22	11	17	0	4	15	0	0	1	0
F1SQR8	Leukotriene A(4) hydrolase OS=Sus scrofa OX=9823 GN=LTA4H PE=3 SV=3	69048	15	15	1	0	9	0	1	0	0	4	0	0	0	0
A0A287AKB2	YOD1 deubiquitinase OS=Sus scrofa OX=9823 GN=YOD1 PE=1 SV=1	38192	15	15	11	5	10	4	9	6	2	9	3	0	0	0
Q06AT3	Ubiquitin carboxyl-terminal hydrolase isozyme L5 OS=Sus scrofa OX=9823 GN=UCHL5 PE=2 SV=1	37577	15	12	10	1	13	2	6	0	2	8	0	0	0	0
I3LLY2	Glycerophosphodiester phosphodiesterase 1 OS=Sus scrofa OX=9823 GN=GDE1 PE=4 SV=1	37638	15	15	5	19	13	4	8	26	6	4	19	0	0	0
F1RK74	Solute carrier family 25 member 1 OS=Sus scrofa OX=9823 GN=SLC25A1 PE=1 SV=3	33957	15	15	7	0	18	0	14	0	0	11	0	0	2	0
F1RHF0	Ubiquitin carboxyl-terminal hydrolase OS=Sus scrofa OX=9823 GN=UCHL3 PE=1 SV=3	26164	15	15	11	4	15	3	7	1	0	9	0	0	0	0
A0A287BHL2	Phosphoglycolate phosphatase OS=Sus scrofa OX=9823 GN=PGP PE=1 SV=1	34290	15	15	9	8	7	6	11	5	3	10	4	0	0	0
I3LLU0	Glycerol-3-phosphate dehydrogenase [NAD(+)] OS=Sus scrofa OX=9823 GN=GPD1L PE=1 SV=1	38225	15	7	15	1	8	5	11	2	4	8	1	0	2	0
F1RV19	Archaelysin family metallopeptidase 2 OS=Sus scrofa OX=9823 GN=AMZ2 PE=4 SV=3	42419	15	15	9	8	7	10	9	6	5	8	13	0	0	0
F1SF87	Solute carrier family 25 member 13 OS=Sus scrofa OX=9823 GN=SLC25A13 PE=1 SV=3	74330	15	12	11	0	7	1	5	0	0	5	0	0	1	1
A0A286ZIE2	Uncharacterized protein OS=Sus scrofa OX=9823 PE=4 SV=1	47876	15	15	6	1	8	5	2	0	1	3	2	0	0	0
I3LCG5	Phospholipase B-like OS=Sus scrofa OX=9823 GN=PLBD1 PE=1 SV=2	62308	15	15	7	0	4	0	13	0	0	11	0	0	0	0
A0A287AYB1	Uncharacterized protein OS=Sus scrofa OX=9823 GN=LOC102165484 PE=4 SV=1	50100	15	2	11	13	4	10	6	14	6	10	14	0	0	0
A0A287AP83	Pro-epidermal growth factor OS=Sus scrofa OX=9823 GN=EGF PE=4 SV=1	110072	15	15	13	4	6	7	3	2	1	3	4	0	0	0
F1RWM9	Uncharacterized protein OS=Sus scrofa OX=9823 GN=CCDC183 PE=4 SV=2	61655	15	15	4	0	12	9	5	0	0	3	0	0	0	0
A0A287ADP5	Protein lin-7 homolog OS=Sus scrofa OX=9823 GN=LIN7A PE=1 SV=1	26003	15	15	9	9	8	7	3	7	2	7	13	0	0	0
F1S5Q9	Theg spermatid protein OS=Sus scrofa OX=9823 GN=THEG PE=4 SV=3	43616	15	15	9	5	2	6	6	2	14	10	3	0	0	0
F1S0G4	Chromosome 6 open reading frame 163 OS=Sus scrofa OX=9823 GN=C6orf163 PE=4 SV=3	38565	15	15	6	0	6	9	3	0	0	2	0	0	0	0
K7GT57	Spliceosome RNA helicase DDX39B OS=Sus scrofa OX=9823 GN=DDX39B PE=4 SV=2	57529	15	11	15	0	1	14	0	0	8	0	0	0	0	0
F1S3H7	Uncharacterized protein OS=Sus scrofa OX=9823 GN=PTGR2 PE=1 SV=3	38372	15	15	4	0	11	0	1	0	0	2	0	0	0	2
F1SBK5	Ankyrin repeat and EF-hand domain containing 1 OS=Sus scrofa OX=9823 GN=ANKEF1 PE=4 SV=1	86902	15	15	10	0	10	16	5	0	1	7	0	0	0	0
A0A287AXF5	Calnexin OS=Sus scrofa OX=9823 GN=CANX PE=1 SV=1	67597	15	15	17	0	1	6	0	0	3	0	0	7	5	3
A0A287AAS9	Catenin beta 1 OS=Sus scrofa OX=9823 GN=CTNNB1 PE=1 SV=1	80081	15	7	8	5	0	3	20	3	4	17	0	0	14	10
F1SPB5	Uncharacterized protein OS=Sus scrofa OX=9823 GN=MAATS1 PE=4 SV=3	89635	15	15	6	0	6	3	2	0	0	3	0	0	0	0
A0A287AKM3	BCS1 homolog ubiquinol-cytochrome c reductase complex chaperone OS=Sus scrofa OX=9823 GN=BCS1L PE=1 SV=1	47442	15	15	7	3	8	0	7	0	0	6	1	1	2	0
A0A286ZM75	Uncharacterized protein OS=Sus scrofa OX=9823 GN=LOC102165484 PE=4 SV=1	50239	15	2	8	7	5	9	4	11	6	7	11	0	0	0
A0A287B7S7	Acyl-CoA synthetase family member 2 OS=Sus scrofa OX=9823 GN=ACSF2 PE=1 SV=1	68113	15	15	11	0	0	4	0	0	15	0	0	0	0	0
F1RML9	Chromosome 11 open reading frame 42 OS=Sus scrofa OX=9823 GN=C11orf42 PE=4 SV=1	36123	15	15	8	6	5	9	6	5	5	5	9	0	0	0
F1RGH8	Uncharacterized protein OS=Sus scrofa OX=9823 GN=GSK3A PE=1 SV=3	50960	15	9	10	2	8	4	6	0	1	10	0	0	0	0
P19757	Protamine-2 OS=Sus scrofa OX=9823 GN=PRM2 PE=2 SV=1	11807	14	14	136	2	19	67	18	0	141	19	0	2	0	0
F1S5M0	ATPase H+ transporting V1 subunit E2 OS=Sus scrofa OX=9823 GN=ATP6V1E2 PE=3 SV=1	26081	14	14	1	0	15	0	3	0	0	4	1	0	0	0
A0A287BCV9	GLIPR1 like 1 OS=Sus scrofa OX=9823 GN=GLIPR1L1 PE=1 SV=1	26962	14	14	16	10	18	5	19	3	4	22	7	0	3	0
P05207	cAMP-dependent protein kinase type II-alpha regulatory subunit (Fragment) OS=Sus scrofa OX=9823 GN=PRKAR2A PE=1 SV=1	17706	14	1	19	1	14	7	9	0	1	12	1	0	2	0
I3LK43	NADH:ubiquinone oxidoreductase core subunit S7 OS=Sus scrofa OX=9823 GN=NDUFS7 PE=1 SV=2	21767	14	4	8	0	20	3	10	0	0	11	0	0	1	0
I3LTE3	Serine protease 54 OS=Sus scrofa OX=9823 GN=PRSS54 PE=1 SV=2	43943	14	14	12	2	13	0	11	0	0	14	0	0	0	0
A0A286ZVK0	Uncharacterized protein OS=Sus scrofa OX=9823 GN=TMEM38B PE=1 SV=1	32477	14	14	25	15	9	2	12	2	0	21	1	0	3	0
D0G773	Isovaleryl Coenzyme A dehydrogenase OS=Sus scrofa OX=9823 GN=IVD PE=2 SV=1	46680	14	2	6	0	7	1	13	0	0	14	3	3	0	7
A0A287B0I4	ADP ribosylation factor like GTPase 8B OS=Sus scrofa OX=9823 GN=ARL8B PE=1 SV=1	21554	14	8	14	2	14	10	2	0	3	2	4	0	0	0
P20305	Gelsolin (Fragment) OS=Sus scrofa OX=9823 GN=GSN PE=1 SV=1	84775	14	14	17	0	2	9	2	0	4	1	0	11	2	2
Q8SPJ0	Inactive ribonuclease-like protein 10 OS=Sus scrofa OX=9823 GN=RNASE10 PE=1 SV=1	23740	14	14	2	0	18	0	6	2	0	7	6	0	0	0
I3LFE8	Pyrophosphatase (inorganic) 2 OS=Sus scrofa OX=9823 GN=PPA2 PE=1 SV=2	38757	14	14	7	0	9	0	7	0	0	6	0	0	0	0
F1RH17	Family with sequence similarity 71 member E1 OS=Sus scrofa OX=9823 GN=FAM71E1 PE=4 SV=2	24054	14	14	23	13	9	20	14	13	6	14	23	0	2	0
A0A287AYC9	WD repeat domain 63 OS=Sus scrofa OX=9823 GN=WDR63 PE=4 SV=1	102272	14	14	5	0	7	13	3	0	1	4	0	0	0	0
F1RT83	Syndecan binding protein OS=Sus scrofa OX=9823 GN=SDCBP PE=1 SV=3	32429	14	14	18	0	2	7	3	0	3	4	0	0	0	0
P63246	Receptor of activated protein C kinase 1 OS=Sus scrofa OX=9823 GN=RACK1 PE=1 SV=3	35077	14	14	11	5	0	20	6	3	13	2	2	0	0	0
A0A287AV76	BCL2 associated athanogene 2 OS=Sus scrofa OX=9823 GN=BAG2 PE=1 SV=1	23644	14	14	5	0	20	0	4	1	0	6	3	0	0	0
F1SQP4	NADH dehydrogenase [ubiquinone] 1 alpha subcomplex subunit 12 OS=Sus scrofa OX=9823 GN=NDUFA12 PE=1 SV=2	17136	14	14	4	0	14	2	4	0	0	6	0	0	0	0
A0A287ARC8	Serine/threonine-protein phosphatase 2A activator OS=Sus scrofa OX=9823 GN=PTPA PE=1 SV=1	41385	14	14	5	7	10	4	7	5	5	6	7	0	0	2
F2Z5N6	Serine/threonine-protein phosphatase OS=Sus scrofa OX=9823 GN=PPP6C PE=1 SV=1	35144	14	14	7	8	7	11	8	5	3	10	9	0	0	0
A0A0B8RVG5	Suppression of tumorigenicity 13 (Colon carcinoma) (Hsp70 interacting protein) OS=Sus scrofa domesticus OX=9825 GN=ST13 PE=4 SV=1	41434	14	14	6	0	10	0	2	0	0	4	0	0	0	3
F1RS44	N-glycanase 1 OS=Sus scrofa OX=9823 GN=NGLY1 PE=1 SV=3	74486	14	14	6	0	13	0	6	0	0	2	1	0	0	1
Q8WNV7	Dehydrogenase/reductase SDR family member 4 OS=Sus scrofa OX=9823 GN=DHRS4 PE=1 SV=2	29919	14	14	8	0	10	0	8	0	0	8	1	3	0	9
Q3BDI7	Desmoglein-1 OS=Sus scrofa OX=9823 GN=DSG1 PE=2 SV=1	113318	14	14	3	4	2	2	11	9	5	9	7	4	29	16
F1SAN6	IlvB acetolactate synthase like OS=Sus scrofa OX=9823 GN=ILVBL PE=1 SV=3	68563	14	14	18	0	1	6	2	0	1	1	0	0	0	0
A0A287BAZ8	Aminoadipate-semialdehyde synthase OS=Sus scrofa OX=9823 GN=AASS PE=1 SV=1	102090	14	14	7	0	10	0	6	0	0	3	0	0	0	0
C4MXZ1	ADP-ribosylation factor 1 OS=Sus scrofa OX=9823 GN=ARF1 PE=1 SV=1	20697	14	9	17	1	2	5	5	2	2	3	4	0	0	10
I3LMP8	Uncharacterized protein OS=Sus scrofa OX=9823 GN=RMDN2 PE=4 SV=2	54481	14	14	9	0	10	0	8	0	0	11	0	0	0	0
A0A0K1TQQ7	Carbonyl reductase 3 OS=Sus scrofa OX=9823 GN=CBR3 PE=2 SV=1	30596	14	3	10	0	10	4	9	0	0	2	4	3	4	3
F1RKY8	Phosphomannomutase OS=Sus scrofa OX=9823 GN=PMM2 PE=1 SV=2	28014	14	14	11	6	9	7	6	2	1	8	5	0	0	0
F1S6Q1	Uncharacterized protein OS=Sus scrofa OX=9823 GN=NDUFA13 PE=1 SV=3	18494	14	14	0	0	14	0	4	0	0	2	0	0	1	0
A0A287A7V2	Acyl-CoA thioesterase 7 OS=Sus scrofa OX=9823 GN=ACOT7 PE=1 SV=1	38651	14	14	13	2	10	6	10	3	2	12	3	0	0	0
A0A287BJM7	Uncharacterized protein OS=Sus scrofa OX=9823 PE=4 SV=1	91452	14	14	11	0	3	14	3	0	0	5	0	0	0	0
I3LDC3	NADH:ubiquinone oxidoreductase subunit B10 OS=Sus scrofa OX=9823 GN=NDUFB10 PE=1 SV=1	20912	14	14	0	4	13	0	5	7	0	5	10	0	2	0
A0A287A1U0	Sortilin OS=Sus scrofa OX=9823 GN=SORT1 PE=1 SV=1	104974	14	14	5	0	9	4	3	0	1	4	0	0	0	0
A0A286ZXT4	Uncharacterized protein OS=Sus scrofa OX=9823 PE=4 SV=1	36893	14	14	10	3	5	10	2	0	1	2	0	0	0	0
I3LVF5	Uncharacterized protein OS=Sus scrofa OX=9823 GN=PA2G4 PE=1 SV=2	43788	14	14	12	1	0	12	8	1	2	4	1	0	0	0
Q45FY6	Hypoxanthine-guanine phosphoribosyltransferase OS=Sus scrofa OX=9823 GN=HPRT1 PE=2 SV=3	24555	14	14	2	1	6	0	4	2	0	6	2	2	4	14
F1RMV5	ETHE1 persulfide dioxygenase OS=Sus scrofa OX=9823 GN=ETHE1 PE=1 SV=2	27024	14	14	6	5	4	7	3	0	4	9	4	0	3	3
I3LGN8	Plakophilin 1 OS=Sus scrofa OX=9823 GN=PKP1 PE=1 SV=2	80688	14	14	3	1	0	0	4	1	1	5	0	1	18	7
A0A287A9Z2	L-2-hydroxyglutarate dehydrogenase OS=Sus scrofa OX=9823 GN=L2HGDH PE=1 SV=1	46081	14	3	6	0	5	0	9	0	0	9	0	0	0	0
A0A286ZTR0	Dynein regulatory complex subunit 1 OS=Sus scrofa OX=9823 GN=DRC1 PE=4 SV=1	75798	14	14	1	0	14	7	1	0	2	2	0	0	0	0
F1S0V3	Annexin OS=Sus scrofa OX=9823 GN=ANXA6 PE=1 SV=3	75798	14	14	8	0	0	2	0	0	0	0	0	8	1	1
P22411	Dipeptidyl peptidase 4 OS=Sus scrofa OX=9823 GN=DPP4 PE=1 SV=3	88242	14	14	3	0	7	4	3	0	1	0	0	0	0	0
A0A287A2J3	Cysteinyl-tRNA synthetase 2 mitochondrial OS=Sus scrofa OX=9823 GN=CARS2 PE=1 SV=1	61101	14	14	4	0	3	0	7	0	0	7	0	5	8	7
I3L677	Glucose-6-phosphate 1-dehydrogenase OS=Sus scrofa OX=9823 GN=G6PD PE=1 SV=2	63351	14	1	8	0	2	5	0	0	2	0	0	0	0	9
A0A0B8RVW4	Glucose-6-phosphate 1-dehydrogenase OS=Sus scrofa domesticus OX=9825 GN=G6PD PE=3 SV=1	59248	14	1	7	0	2	5	0	0	2	0	0	0	0	9
F1RWJ5	Importin subunit beta-1 OS=Sus scrofa OX=9823 GN=KPNB1 PE=1 SV=3	97225	14	14	18	0	0	4	0	0	1	0	0	0	0	5
F1SCV6	Cilia and flagella associated protein 46 OS=Sus scrofa OX=9823 GN=CFAP46 PE=4 SV=3	248424	14	7	7	0	8	0	2	0	0	5	0	0	0	0
I3L712	Phosphoribosylformylglycinamidine synthase OS=Sus scrofa OX=9823 GN=PFAS PE=1 SV=2	138938	14	14	0	0	7	0	3	0	0	3	0	0	0	7
F1RVE8	Ubiquitin like modifier activating enzyme 6 OS=Sus scrofa OX=9823 GN=UBA6 PE=1 SV=3	115604	14	14	4	0	8	0	3	0	0	0	0	0	0	3
F1RWC5	Kinesin-like protein OS=Sus scrofa OX=9823 GN=KIF5B PE=1 SV=2	109762	14	14	8	0	5	5	1	0	1	0	0	0	0	0
A0A286ZT09	Uncharacterized protein OS=Sus scrofa OX=9823 GN=CROT PE=4 SV=1	66766	14	14	1	0	0	0	0	0	0	0	6	3	9	10
A0A287BQ35	Alpha-L-fucosidase OS=Sus scrofa OX=9823 GN=FUCA1 PE=1 SV=1	51787	14	14	2	0	2	1	0	0	0	1	0	0	1	6
I3LKM6	Tudor domain containing 1 OS=Sus scrofa OX=9823 GN=TDRD1 PE=4 SV=2	129856	14	14	10	0	0	4	0	0	3	0	0	0	0	0
I3LTB4	Cystatin OS=Sus scrofa OX=9823 GN=LOC100516302 PE=3 SV=2	17221	13	13	5	0	43	2	0	2	0	1	2	0	0	0
I3LN92	NME/NM23 family member 5 OS=Sus scrofa OX=9823 GN=NME5 PE=3 SV=1	24116	13	13	5	6	24	4	6	6	4	5	7	0	0	0
K7GPW3	MICOS complex subunit OS=Sus scrofa OX=9823 GN=APOO PE=1 SV=1	22372	13	13	8	1	13	0	5	0	0	5	0	0	0	0
A0A287BEC7	Vesicle associated membrane protein 3 OS=Sus scrofa OX=9823 GN=VAMP3 PE=1 SV=1	15264	13	13	7	2	23	2	9	5	1	10	3	0	1	0
F1SJ34	Cytochrome c oxidase subunit 5A OS=Sus scrofa OX=9823 GN=COX5A PE=1 SV=1	16748	13	13	3	2	35	1	5	5	1	10	8	0	4	2
A0A286ZYM6	ATP synthase peripheral stalk-membrane subunit b OS=Sus scrofa OX=9823 GN=ATP5PB PE=1 SV=1	28627	13	13	5	0	25	0	2	0	0	6	0	0	0	0
A0A286ZJU5	Malignant T-cell-amplified sequence OS=Sus scrofa OX=9823 GN=LOC100738684 PE=1 SV=1	20546	13	13	17	17	9	19	19	18	15	16	23	1	2	0
Q32YV9	Proteasome 26S subunit non-ATPase 4 OS=Sus scrofa OX=9823 GN=PSMD4 PE=2 SV=1	40764	13	2	14	0	15	2	13	0	2	12	0	0	0	0
Q95KR6	NAD(P)(+)--arginine ADP-ribosyltransferase (Fragment) OS=Sus scrofa OX=9823 GN=ART3 PE=2 SV=1	19521	13	3	6	1	20	1	8	1	2	6	0	0	2	0
Q684M6	CDC37 cell division cycle 37 protein OS=Sus scrofa OX=9823 GN=CDC37 PE=1 SV=1	44490	13	13	5	0	12	1	1	0	0	2	0	0	0	0
A0A288CG47	Proteasome 26S subunit non-ATPase 4 OS=Sus scrofa OX=9823 GN=PSMD4 PE=1 SV=1	41106	13	2	14	0	14	1	11	0	2	10	0	0	0	0
F1SSR4	Uncharacterized protein OS=Sus scrofa OX=9823 GN=IVD PE=1 SV=2	53738	13	1	6	0	6	1	12	0	0	13	2	2	0	5
A0A287B9B0	NADH:ubiquinone oxidoreductase core subunit S7 OS=Sus scrofa OX=9823 GN=NDUFS7 PE=1 SV=1	28460	13	3	5	0	16	3	5	0	0	9	0	0	1	0
A0A287B186	Vesicle-associated membrane protein-associated protein B OS=Sus scrofa OX=9823 GN=VAPB PE=4 SV=1	27037	13	12	29	0	10	11	10	0	2	10	0	0	0	4
A0A287B7U4	Transmembrane protein 190 OS=Sus scrofa OX=9823 GN=TMEM190 PE=4 SV=1	19839	13	13	25	4	20	6	9	2	6	17	3	0	2	0
A0A286ZSD7	Stomatin like 2 OS=Sus scrofa OX=9823 GN=STOML2 PE=1 SV=1	38645	13	13	4	9	8	0	10	4	0	9	6	1	7	4
F1SFQ4	Poly(rC) binding protein 2 OS=Sus scrofa OX=9823 GN=PCBP2 PE=1 SV=2	37231	13	2	19	1	2	21	1	0	8	1	0	0	0	0
F1SDE3	Centromere protein V OS=Sus scrofa OX=9823 GN=CENPV PE=1 SV=2	28087	13	13	18	16	8	19	8	11	37	10	8	1	3	0
A0A287B5Q7	Uncharacterized protein OS=Sus scrofa OX=9823 GN=PSMD8 PE=1 SV=1	39732	13	13	1	0	15	1	2	0	0	3	0	0	0	0
A0A287BHQ2	Uncharacterized protein OS=Sus scrofa OX=9823 GN=HMGB3 PE=4 SV=1	23112	13	13	4	0	7	5	1	1	20	3	3	0	0	0
F1SGT3	Dihydrolipoamide acetyltransferase component of pyruvate dehydrogenase complex OS=Sus scrofa OX=9823 GN=PDHX PE=1 SV=2	51180	13	13	6	9	18	0	8	2	0	13	2	0	0	0
I3LEC2	Poly(rC) binding protein 1 OS=Sus scrofa OX=9823 GN=PCBP1 PE=1 SV=1	37502	13	11	21	1	1	24	1	1	12	1	0	0	1	2
I3LLY4	N-ribosyldihydronicotinamide:quinone reductase 2 OS=Sus scrofa OX=9823 GN=NQO2 PE=1 SV=2	26120	13	13	0	0	7	0	3	0	0	2	0	0	1	17
A0A287AN43	Terminal nucleotidyltransferase 5C OS=Sus scrofa OX=9823 GN=TENT5C PE=4 SV=1	44799	13	13	7	10	2	8	5	11	5	7	9	0	0	0
F1SHX9	L-2-hydroxyglutarate dehydrogenase OS=Sus scrofa OX=9823 GN=L2HGDH PE=1 SV=2	45957	13	2	7	0	5	0	8	0	0	9	0	0	0	0
F1SPF8	DnaJ heat shock protein family (Hsp40) member B8 OS=Sus scrofa OX=9823 GN=DNAJB8 PE=4 SV=1	25494	13	11	14	8	7	9	7	7	10	12	11	0	0	0
A0A286ZIJ0	Ferritin OS=Sus scrofa OX=9823 PE=3 SV=1	35200	13	3	6	8	8	7	7	10	10	7	14	0	0	0
K7GM40	Apolipoprotein A-I OS=Sus scrofa OX=9823 GN=APOA1 PE=3 SV=2	30330	13	13	0	0	14	0	6	0	0	6	0	47	1	0
F1RIY9	Protein kinase cAMP-dependent type I regulatory subunit beta OS=Sus scrofa OX=9823 GN=PRKAR1B PE=4 SV=3	43069	13	10	10	1	5	8	9	2	1	9	0	0	0	0
A0A287A3A3	A-kinase anchoring protein 12 OS=Sus scrofa OX=9823 GN=AKAP12 PE=1 SV=1	179358	13	1	1	0	10	0	7	0	0	2	0	0	0	0
A0A287AF01	Uncharacterized protein OS=Sus scrofa OX=9823 PE=4 SV=1	65285	13	13	6	1	7	11	3	0	0	3	0	0	0	0
A0A287AZQ5	TNF alpha induced protein 2 OS=Sus scrofa OX=9823 GN=TNFAIP2 PE=4 SV=1	77660	13	13	9	1	9	2	5	1	0	5	1	0	0	0
V5PZZ6	Arrestin domain-containing 5 OS=Sus scrofa OX=9823 GN=ARRDC5 PE=2 SV=1	37585	13	13	8	4	5	3	4	1	1	5	3	0	0	0
A0A287AUQ9	A-kinase anchoring protein 12 OS=Sus scrofa OX=9823 GN=AKAP12 PE=1 SV=1	177082	13	1	1	0	9	0	8	0	0	3	0	0	0	0
A0A286ZUK9	Uncharacterized protein OS=Sus scrofa OX=9823 GN=PPP1R16A PE=1 SV=1	116628	13	13	4	0	4	0	7	0	0	5	0	0	0	0
A0A287BRL7	Propionyl-CoA carboxylase subunit alpha OS=Sus scrofa OX=9823 GN=PCCA PE=1 SV=1	76668	13	12	1	0	7	0	6	0	0	2	0	0	0	0
A0A288CFV5	Serotransferrin OS=Sus scrofa OX=9823 GN=TF PE=3 SV=1	78806	13	7	1	1	3	0	0	4	0	0	0	21	13	3
F1RN71	Uncharacterized protein OS=Sus scrofa OX=9823 GN=BLMH PE=1 SV=3	28419	13	13	2	0	4	0	3	0	0	5	0	0	0	9
A9JPD4	Carnitine acetyl transferase OS=Sus scrofa OX=9823 GN=CRAT PE=2 SV=1	70865	13	13	14	0	5	2	9	0	1	8	1	0	0	0
A0A287BSI6	Armadillo repeat containing 6 OS=Sus scrofa OX=9823 GN=ARMC6 PE=1 SV=1	50465	13	13	7	3	0	10	0	1	2	1	3	0	0	0
A0A0K1TQS4	S-(hydroxymethyl)glutathione dehydrogenase OS=Sus scrofa OX=9823 GN=ADH5 PE=2 SV=1	39689	13	13	5	0	6	1	4	2	2	1	1	0	0	8
A0A287AND7	Cytochrome c oxidase subunit OS=Sus scrofa OX=9823 GN=COX6B2 PE=3 SV=1	10511	13	13	2	2	18	4	16	2	3	12	5	0	1	0
F1RPD0	Uncharacterized protein OS=Sus scrofa OX=9823 PE=4 SV=3	70161	13	13	7	0	6	0	5	0	0	2	0	0	0	0
I3LBD3	Testis specific serine kinase 4 OS=Sus scrofa OX=9823 GN=TSSK4 PE=4 SV=2	37972	13	13	7	4	9	4	10	4	2	9	3	0	0	0
F1S2K6	Translin associated factor X interacting protein 1 OS=Sus scrofa OX=9823 GN=TSNAXIP1 PE=4 SV=1	83351	13	13	7	0	3	5	1	0	0	4	0	0	0	0
A0A0B8S080	Beta-galactosidase OS=Sus scrofa domesticus OX=9825 GN=GLB1 PE=3 SV=1	74827	13	12	2	0	0	6	1	0	3	1	0	0	0	0
A0A286ZMW4	Heat shock protein family H (Hsp110) member 1 OS=Sus scrofa OX=9823 GN=HSPH1 PE=1 SV=1	91953	13	9	5	0	4	1	0	0	0	4	0	0	0	2
F1RL96	Synaptogyrin OS=Sus scrofa OX=9823 GN=SYNGR4 PE=3 SV=2	25147	12	12	7	0	17	0	7	0	0	9	0	0	2	0
A0A287BEN1	Uncharacterized protein OS=Sus scrofa OX=9823 GN=SPINK2 PE=1 SV=1	9497	12	12	10	15	37	9	17	49	11	15	68	0	1	0
A0A287B620	Uncharacterized protein OS=Sus scrofa OX=9823 PE=3 SV=1	32057	12	12	9	0	16	2	7	0	0	4	0	0	0	0
A0A287AG08	Mitochondrial pyruvate carrier OS=Sus scrofa OX=9823 GN=MPC1L PE=3 SV=1	17228	12	12	10	8	9	0	12	0	0	15	2	0	4	0
F1SRG9	Lysozyme like 4 OS=Sus scrofa OX=9823 GN=LYZL4 PE=3 SV=2	16120	12	12	6	3	9	24	2	5	9	6	5	1	0	0
F1S365	Uroporphyrinogen decarboxylase OS=Sus scrofa OX=9823 GN=UROD PE=1 SV=2	40822	12	12	4	0	14	1	1	0	0	2	0	0	0	0
F1SKR5	WD repeat domain 38 OS=Sus scrofa OX=9823 GN=WDR38 PE=4 SV=2	34430	12	12	10	13	3	7	9	9	13	8	14	0	0	0
F1RG16	Uncharacterized protein OS=Sus scrofa OX=9823 GN=HNRNPF PE=1 SV=1	45670	12	10	24	0	0	17	1	0	16	0	0	0	0	1
F1S2N0	Glutathione S-transferase zeta 1 OS=Sus scrofa OX=9823 GN=GSTZ1 PE=1 SV=2	24121	12	12	18	7	10	8	18	2	2	12	6	0	1	0
A0A286ZXQ0	Atlastin GTPase 3 OS=Sus scrofa OX=9823 GN=ATL3 PE=1 SV=1	61932	12	12	10	0	4	3	4	0	0	2	0	0	0	0
F1SBZ8	SPARC related modular calcium binding 2 OS=Sus scrofa OX=9823 GN=SMOC2 PE=4 SV=3	55181	12	12	9	0	13	1	11	0	0	8	0	0	0	0
A0A287ACY1	RAN guanine nucleotide release factor OS=Sus scrofa OX=9823 GN=RANGRF PE=1 SV=1	16290	12	12	20	13	12	12	14	12	6	14	10	0	3	0
Q29551	Succinyl-CoA:3-ketoacid coenzyme A transferase 1 mitochondrial OS=Sus scrofa OX=9823 GN=OXCT1 PE=1 SV=2	56338	12	12	11	0	9	0	10	0	0	10	0	0	0	0
K7GKN1	Casein kinase II subunit beta OS=Sus scrofa OX=9823 GN=CSNK2B PE=1 SV=2	33847	12	1	7	7	8	4	11	16	5	12	13	0	0	3
Q2EN76	Nucleoside diphosphate kinase B OS=Sus scrofa OX=9823 GN=NME2 PE=2 SV=1	17176	12	7	8	0	17	3	11	0	5	10	0	0	2	12
I3LE65	ATP6V1F neighbor OS=Sus scrofa OX=9823 GN=ATP6V1FNB PE=4 SV=2	24520	12	12	9	9	7	5	6	3	6	5	7	0	0	0
F1RQT8	T-complex-associated-testis-expressed 1 OS=Sus scrofa OX=9823 GN=TCTE1 PE=4 SV=1	55322	12	12	4	1	12	8	5	1	1	4	2	0	0	0
I3LLF2	Dolichyl-diphosphooligosaccharide--protein glycosyltransferase subunit 2 OS=Sus scrofa OX=9823 GN=RPN2 PE=1 SV=2	69197	12	12	10	0	1	4	0	0	4	0	0	0	0	1
F1SLV1	Leucine rich repeat containing 23 OS=Sus scrofa OX=9823 GN=LRRC23 PE=4 SV=2	39586	12	12	8	0	12	1	4	0	0	4	0	0	0	0
I3LGM4	Uncharacterized protein OS=Sus scrofa OX=9823 GN=NDUFA11 PE=1 SV=1	14672	12	12	1	1	16	2	3	0	0	2	2	0	0	0
A0A287BBM3	Uncharacterized protein OS=Sus scrofa OX=9823 GN=GML PE=4 SV=1	18059	12	12	3	0	14	0	11	0	0	11	0	0	1	0
A0A287BCG1	ASPSCR1 UBX domain containing tether for SLC2A4 OS=Sus scrofa OX=9823 GN=ASPSCR1 PE=4 SV=1	59755	12	12	15	4	2	14	4	2	3	4	5	0	0	0
I3LC58	GLIPR1 like 2 OS=Sus scrofa OX=9823 GN=GLIPR1L2 PE=4 SV=2	39608	12	12	0	3	13	0	3	8	2	3	10	0	0	0
I3LQ82	Endosome associated trafficking regulator 1 OS=Sus scrofa OX=9823 GN=ENTR1 PE=4 SV=2	45760	12	12	7	6	3	5	6	8	6	4	8	0	0	0
F1RT57	Protein phosphatase 1 regulatory subunit 9B OS=Sus scrofa OX=9823 GN=PPP1R9B PE=1 SV=2	88497	12	12	11	7	3	9	8	3	2	14	2	0	0	0
F1SB33	Uncharacterized protein OS=Sus scrofa OX=9823 GN=SYPL1 PE=1 SV=2	26280	12	12	16	1	20	4	20	0	2	18	1	0	2	1
A0A287BHL0	Poly(rC) binding protein 2 OS=Sus scrofa OX=9823 GN=PCBP2 PE=1 SV=1	31355	12	1	16	1	2	17	1	0	8	1	0	0	0	0
F1RP25	Citrate lyase beta like OS=Sus scrofa OX=9823 GN=CLYBL PE=1 SV=3	37494	12	12	2	0	14	0	9	0	0	7	0	0	0	0
F1SEJ6	Family with sequence similarity 170 member B OS=Sus scrofa OX=9823 GN=FAM170B PE=4 SV=2	32152	12	12	11	12	0	16	11	4	20	10	7	0	3	0
D5K8A4	Spermatogenesis associated 3 OS=Sus scrofa OX=9823 GN=SPATA3 PE=2 SV=1	22127	12	12	24	23	6	25	17	13	58	19	15	2	6	0
A5GFN6	mRNA export factor OS=Sus scrofa OX=9823 GN=RAE1 PE=3 SV=1	41025	12	12	14	9	4	9	10	2	5	8	5	0	0	0
A0A287AKD1	Chromosome 1 open reading frame 185 OS=Sus scrofa OX=9823 GN=C1orf185 PE=4 SV=1	25879	12	12	12	5	5	12	7	10	8	5	15	0	0	0
A0A287AVS0	Uncharacterized protein OS=Sus scrofa OX=9823 PE=4 SV=1	19025	12	11	3	0	14	0	6	0	0	7	0	0	0	0
F1SN46	Chromosome 15 open reading frame 48 OS=Sus scrofa OX=9823 GN=C15orf48 PE=1 SV=1	9631	12	12	1	0	18	0	8	0	0	5	0	0	0	0
A0A287ABX4	Ring finger protein 138 OS=Sus scrofa OX=9823 GN=RNF138 PE=4 SV=1	28219	12	12	13	12	2	11	7	11	10	7	12	0	0	0
A0A287BM71	Cilia and flagella associated protein 69 OS=Sus scrofa OX=9823 GN=CFAP69 PE=4 SV=1	106177	12	12	5	0	7	0	8	0	0	8	0	0	0	0
F1SHR6	Haloacid dehalogenase like hydrolase domain containing 5 OS=Sus scrofa OX=9823 GN=HDHD5 PE=1 SV=3	44899	12	12	6	0	6	0	6	0	0	7	0	1	0	1
F1S3P8	Syntaxin 7 OS=Sus scrofa OX=9823 GN=STX7 PE=1 SV=1	29865	12	12	1	0	15	0	2	0	0	1	0	0	0	0
A0A287BG40	Uncharacterized protein OS=Sus scrofa OX=9823 GN=NDUFV2 PE=1 SV=1	27407	12	12	3	0	8	0	7	0	0	9	0	1	4	1
I3LNK5	G1 to S phase transition 1 OS=Sus scrofa OX=9823 GN=GSPT1 PE=1 SV=2	69025	12	12	12	0	3	3	1	0	0	0	0	0	0	0
I3LM03	Uncharacterized protein OS=Sus scrofa OX=9823 GN=LOC110256481 PE=1 SV=2	31652	12	1	6	0	9	2	7	0	0	2	3	4	4	3
F1S8M4	Chromosome 1 open reading frame 100 OS=Sus scrofa OX=9823 GN=C1orf100 PE=4 SV=2	16400	12	12	8	9	5	8	6	3	12	10	6	0	0	0
A0A286ZUK6	Tissue specific transplantation antigen P35B OS=Sus scrofa OX=9823 GN=TSTA3 PE=1 SV=1	42697	12	12	4	2	8	2	5	5	0	4	7	0	0	2
A5GFY8	D-3-phosphoglycerate dehydrogenase OS=Sus scrofa OX=9823 GN=PHGDH PE=3 SV=1	56810	12	12	17	1	1	15	1	1	13	2	1	0	0	0
F1SSI1	Protein phosphatase Mg2+/Mn2+ dependent 1A OS=Sus scrofa OX=9823 GN=PPM1A PE=1 SV=3	54602	12	10	6	0	7	0	3	0	0	3	0	0	0	0
Q2L969	Metaxin-2 OS=Sus scrofa OX=9823 GN=MTX2 PE=2 SV=1	30106	12	12	4	2	6	2	4	0	0	5	1	0	0	0
A0A287B2N9	Fatty-acid amide hydrolase 1 OS=Sus scrofa OX=9823 GN=FAAH PE=1 SV=1	62887	12	12	7	14	6	2	7	0	0	8	1	0	0	0
K7GSE5	NADH:ubiquinone oxidoreductase subunit B9 OS=Sus scrofa OX=9823 GN=NDUFB9 PE=1 SV=1	21827	12	12	1	8	12	1	10	5	2	7	8	0	0	0
A0A286ZQ62	Casein kinase 1 gamma 1 OS=Sus scrofa OX=9823 GN=CSNK1G1 PE=3 SV=1	48381	12	4	4	0	9	0	5	0	0	6	0	0	0	0
F1RSD6	Coilin OS=Sus scrofa OX=9823 GN=COIL PE=1 SV=3	59115	12	12	9	0	1	8	4	1	2	5	1	0	0	0
A0A0B8RTN5	Lactoylglutathione lyase OS=Sus scrofa domesticus OX=9825 GN=GLO1 PE=3 SV=1	20731	12	11	2	1	16	0	5	2	0	6	0	4	4	3
I3LVS6	Uncharacterized protein OS=Sus scrofa OX=9823 GN=LOC100523123 PE=3 SV=2	54474	12	2	0	11	2	1	0	6	1	1	3	1	12	4
F1RXC2	Carbonic anhydrase 2 OS=Sus scrofa OX=9823 GN=CA2 PE=1 SV=2	29258	12	12	4	0	11	0	2	0	0	4	0	0	0	0
A0A287ADX5	Mitochondrial import inner membrane translocase subunit TIM44 OS=Sus scrofa OX=9823 GN=TIMM44 PE=1 SV=1	51675	12	12	14	0	5	0	5	0	0	6	0	0	0	0
A0A287BPU6	Adenylate cyclase 3 OS=Sus scrofa OX=9823 GN=ADCY3 PE=1 SV=1	148245	12	12	3	1	1	4	3	3	0	1	1	0	0	9
A0A287AHQ9	HECT and RLD domain containing E3 ubiquitin protein ligase 4 OS=Sus scrofa OX=9823 GN=HERC4 PE=4 SV=1	117730	12	12	6	0	7	0	2	0	0	3	0	0	0	0
F1SRV4	Glutathione S-transferase kappa OS=Sus scrofa OX=9823 GN=GSTK1 PE=1 SV=1	25496	12	12	10	0	6	0	6	0	0	2	0	1	0	6
I3L6T1	Leucine rich repeats and death domain containing 1 OS=Sus scrofa OX=9823 GN=LRRD1 PE=4 SV=2	97005	12	12	4	0	8	0	1	0	0	4	0	0	0	0
A0A287ASH3	NGG1 interacting factor 3 like 1 OS=Sus scrofa OX=9823 GN=NIF3L1 PE=1 SV=1	48992	12	12	2	0	7	0	6	0	0	3	0	0	0	3
P01965	Hemoglobin subunit alpha OS=Sus scrofa OX=9823 GN=HBA PE=1 SV=1	15039	12	12	12	1	0	7	1	0	3	0	0	2	2	0
A0A287BKG3	Gem nuclear organelle associated protein 4 OS=Sus scrofa OX=9823 GN=GEMIN4 PE=4 SV=1	119209	12	12	12	3	0	4	2	3	1	2	2	0	0	0
D0V557	Mitochondrial translocase of outer membrane protein OS=Sus scrofa OX=9823 GN=TOMM40 PE=1 SV=1	37758	12	12	9	4	4	0	3	0	0	5	0	0	0	0
F1SIW4	PHD finger protein 7 OS=Sus scrofa OX=9823 GN=PHF7 PE=4 SV=1	43964	12	12	2	6	2	4	1	1	11	2	3	0	0	0
A0A286ZL98	Uncharacterized protein OS=Sus scrofa OX=9823 GN=DCTN4 PE=1 SV=1	52033	12	12	3	0	10	0	0	0	0	2	0	0	0	0
F1SK78	Coiled-coil domain containing 77 OS=Sus scrofa OX=9823 GN=CCDC77 PE=4 SV=3	58322	12	12	3	5	0	5	3	3	6	4	1	0	0	0
O02772	Fatty acid-binding protein heart OS=Sus scrofa OX=9823 GN=FABP3 PE=2 SV=3	14749	12	12	1	0	3	0	2	0	0	3	0	0	0	13
A0A287BDR1	FAD synthase OS=Sus scrofa OX=9823 GN=CKS1B PE=1 SV=1	55987	12	12	9	1	2	0	6	2	0	3	1	0	0	0
A0A286ZQC1	SGT1 homolog MIS12 kinetochore complex assembly cochaperone OS=Sus scrofa OX=9823 GN=SUGT1 PE=1 SV=1	38290	12	12	2	0	7	0	2	0	0	3	0	0	0	9
K7GMZ8	Ceruloplasmin OS=Sus scrofa OX=9823 GN=CP PE=1 SV=2	121858	12	1	7	1	0	15	2	0	1	0	0	3	0	0
A0A287BQ96	Ral GTPase-activating protein subunit alpha-1 OS=Sus scrofa OX=9823 GN=RALGAPA1 PE=1 SV=1	285469	12	12	2	0	9	0	0	0	0	0	0	0	0	0
I3L5M8	Cullin 4B OS=Sus scrofa OX=9823 GN=CUL4B PE=1 SV=2	103873	12	10	8	0	3	0	2	0	0	2	0	0	0	0
A0A287AGA4	6-phosphofructokinase OS=Sus scrofa OX=9823 GN=PFKL PE=1 SV=1	83819	12	1	10	0	6	1	1	0	0	1	1	0	0	0
F2Z5F2	Uncharacterized protein OS=Sus scrofa OX=9823 GN=RAB10 PE=1 SV=1	22541	12	9	6	1	9	7	3	3	2	6	4	0	0	2
I3LFQ5	6-phosphofructokinase OS=Sus scrofa OX=9823 GN=PFKL PE=1 SV=2	80261	12	1	12	0	6	3	1	0	0	1	1	0	0	0
F1RST3	Testis expressed 26 OS=Sus scrofa OX=9823 GN=TEX26 PE=4 SV=3	31216	12	12	7	5	1	10	0	0	1	1	0	0	0	0
F1S089	Lactamase beta OS=Sus scrofa OX=9823 GN=LACTB PE=1 SV=1	61827	12	12	1	0	0	0	0	0	0	1	2	4	3	7
A0A286ZP27	Keratin 12 OS=Sus scrofa OX=9823 GN=KRT12 PE=3 SV=1	56905	12	2	0	1	3	2	5	5	0	4	1	2	27	12
F1SGG1	Keratin 18 OS=Sus scrofa OX=9823 GN=KRT18 PE=1 SV=3	47418	12	7	3	0	1	7	1	0	2	0	0	1	49	8
A0A287A4B9	Uncharacterized protein OS=Sus scrofa OX=9823 PE=1 SV=1	19430	11	11	9	4	30	11	12	4	4	9	8	0	0	0
A0A287AVW2	Elongation factor Ts mitochondrial OS=Sus scrofa OX=9823 GN=TSFM PE=1 SV=1	41811	11	11	12	1	4	0	17	0	1	14	1	2	0	2
A0A287AHC2	Glucosamine-6-phosphate isomerase OS=Sus scrofa OX=9823 GN=GNPDA1 PE=1 SV=1	35066	11	7	1	3	7	4	8	2	4	7	1	0	0	2
F2Z4Z8	G protein subunit beta 2 OS=Sus scrofa OX=9823 GN=GNB2 PE=1 SV=3	37331	11	7	11	0	1	7	2	1	5	1	1	1	0	0
F1RTM7	Profilin OS=Sus scrofa OX=9823 GN=LOC102159063 PE=3 SV=2	17082	11	11	17	17	6	19	9	13	19	10	16	1	4	0
A0A0D5BWD2	Mitochondrial complement component 1 Q subcomponent-binding protein OS=Sus scrofa OX=9823 GN=C1QBP PE=2 SV=1	31015	11	11	6	2	9	2	5	0	4	10	0	15	4	6
A0A287BIP5	Hydroxyacylglutathione hydrolase OS=Sus scrofa OX=9823 GN=HAGH PE=1 SV=1	33970	11	11	13	3	10	0	7	2	0	7	4	0	0	0
F1RRY6	Prostaglandin E synthase 2 OS=Sus scrofa OX=9823 GN=PTGES2 PE=1 SV=3	41796	11	11	11	1	6	0	7	0	0	7	0	0	0	0
F1RMR6	HSPA (Hsp70) binding protein 1 OS=Sus scrofa OX=9823 GN=HSPBP1 PE=1 SV=2	39113	11	11	9	11	6	5	11	4	2	6	6	0	0	0
I3LHT9	Uncharacterized protein OS=Sus scrofa OX=9823 GN=STX12 PE=1 SV=1	31417	11	11	0	0	11	0	3	0	0	4	0	0	0	0
A7XXV9	NAD-dependent protein deacylase sirtuin-5 mitochondrial OS=Sus scrofa OX=9823 GN=SIRT5 PE=2 SV=1	33619	11	11	6	0	6	0	11	0	0	12	0	3	2	1
A0A287AHB7	Uncharacterized protein OS=Sus scrofa OX=9823 PE=4 SV=1	15072	11	11	6	1	21	3	10	0	3	10	1	0	1	0
A0A287BHA2	Phosphoribosyl pyrophosphate synthetase 1-like 1 OS=Sus scrofa OX=9823 GN=PRPS1L1 PE=4 SV=1	34762	11	2	14	0	11	5	0	0	6	3	1	0	0	0
F1SUP1	Uncharacterized protein OS=Sus scrofa OX=9823 GN=AKR7A2 PE=1 SV=2	40898	11	11	9	0	6	4	7	0	2	4	1	3	2	11
F1RIQ7	Izumo sperm-egg fusion 1 OS=Sus scrofa OX=9823 GN=IZUMO1 PE=4 SV=2	36863	11	11	5	2	8	4	5	2	0	4	3	0	0	0
A0A287BR43	Protein XRP2 OS=Sus scrofa OX=9823 GN=RP2 PE=1 SV=1	37158	11	11	6	0	14	0	4	0	0	3	0	0	0	0
A0A287ASR0	Uncharacterized protein OS=Sus scrofa OX=9823 GN=SLC25A10 PE=3 SV=1	31256	11	11	2	0	9	0	1	0	0	1	0	0	5	1
A0A287AN77	Testis expressed 43 OS=Sus scrofa OX=9823 GN=TEX43 PE=4 SV=1	15563	11	11	5	5	13	1	7	2	6	6	24	0	0	0
Q8MI70	Epididymal secretory protein E3 (Fragment) OS=Sus scrofa OX=9823 GN=E3 PE=1 SV=1	18039	11	11	12	3	15	15	9	6	11	9	8	0	1	0
F1SI09	Uncharacterized protein OS=Sus scrofa OX=9823 GN=PPP1R7 PE=1 SV=2	41395	11	11	2	0	11	1	3	0	0	7	0	0	0	2
A0A287A6G6	Polyamine oxidase OS=Sus scrofa OX=9823 GN=PAOX PE=4 SV=1	55428	11	11	6	0	6	0	6	0	0	7	0	0	0	0
[truncated: 722 more rows]

## Sheet: 4 hrs T-test
					Original Spectrum Counts						Normalized to Outer Dense Spectrum Counts						Normalized by Mean to Ratios						Ratio Cell-Free/Primed			paired t test
[truncated: 2,969 more rows]

[truncated: 1 more sheets: 24 hrs T-test]
